# Supplementary material for: The Genome of Ganderma lucidum Provide Insights into Triterpense Biosynthesis and Wood Degradation
Source: PLoS One. 2012 May 2;7(5):e36146. doi: 10.1371/journal.pone.0036146 (PMC3342255; doi:10.1371/journal.pone.0036146)
Supplement: File S1 — Table S1. The codon and anti-codon usage of G. lucidum . Table S2. G. lucidum gene annotation. Table S3. Fungi used in the study and their download websites. Table S4. The gene distribution of each fungus in each pathway. Table S5. The number of genes in each gene family and each organism. Table S6. G. lucidum specific gene families as compared to other fungi. Table S7. Protein families showing the highest rate of expansion in G. lucidum genome as compared to other fungi. Table S8. Protein families showing lower size in G. lucidum genome as compared to other fungi. Table S9. The number of genes related vegetative incompatibility in each fungus. (XLS) [file pone.0036146.s001.xls]

## Sheet: S1
Table S1. The codon and anti-codon usage of G.lucidum
codon	codon usage	anti-codon	anti-codon usage
AAA	0.009	TTT	0.008
AAC	0.023	GTT	0.021
AAG	0.032	CTT	0.067
ACA	0.01	TGT	0.013
ACC	0.02	GGT	0.004
ACG	0.02	CGT	0.021
ACT	0.01	AGT	0.017
AGA	0.004	TCT	0.017
AGC	0.016	GCT	0.021
AGG	0.008	CCT	0.008
ATA	0.005	TAT	0.008
ATG	0.02	CAT	0.046
ATT	0.01	AAT	0.013
CAA	0.011	TTG	0.017
CAC	0.017	GTG	0.029
CAG	0.024	CTG	0.033
CCA	0.013	TGG	0.008
CCG	0.019	CGG	0.017
CCT	0.015	AGG	0.042
CGA	0.007	TCG	0.013
CGG	0.013	CCG	0.008
CGT	0.01	ACG	0.029
CTA	0.005	TAG	0.004
CTG	0.02	CAG	0.013
CTT	0.014	AAG	0.033
GAA	0.017	TTC	0.029
GAC	0.039	GTC	0.05
GAG	0.041	CTC	0.054
GCA	0.017	TGC	0.008
GCG	0.033	CGC	0.025
GCT	0.016	AGC	0.033
GGA	0.011	TCC	0.021
GGC	0.028	GCC	0.046
GGG	0.015	CCC	0.017
GTA	0.006	TAC	0.008
GTG	0.019	CAC	0.013
GTT	0.011	AAC	0.029
TAC	0.018	GTA	0.021
TCA	0.009	TGA	0.013
TCG	0.02	CGA	0.017
TCT	0.013	AGA	0.021
TGC	0.008	GCA	0.021
TGG	0.014	CCA	0.021
TTA	0.003	TAA	0.013
TTC	0.029	GAA	0.021
TTG	0.012	CAA	0.013
codon lacking anti-codon
AAT	0.008
AGT	0.006
ATC	0.029
CAT	0.009
CCC	0.023
CGC	0.022
CTC	0.038
GAT	0.018
GCC	0.027
GGT	0.013
GTC	0.031
TAA	0
TAG	0.001
TAT	0.008
TCC	0.021
TGA	0.001
TGT	0.004
TTT	0.008

## Sheet: S2
Table S2. G. lucidum gene annotation
Gene ID	PFAM	KEGG	COG	swissprot	trembl	NCBI NR	IPR	GO
G_lucidum_10000222	PF01987.11;	NA	COG2013 Uncharacterized conserved protein S Function unknown ;	Y233_STRP6 Uncharacterized protein M6_Spy0233 OS=Streptococcus pyogenes serotype M6 GN=M6_Spy0233 PE=1 SV=1	D5GAL7_9PEZI Whole genome shotgun sequence assembly, scaffold_183, strain Mel28 OS=Tuber melanosporum GN=GSTUM_00003674001 PE=4 SV=1	hypothetical protein [Tuber melanosporum Mel28]	IPR002838; Protein of unknown function DUF124 IPR016031; Tryptophan RNA-binding attenuator protein-like	NA
G_lucidum_10000223	NA	NA	NA	NA	B0D0Q8_LACBS Predicted protein OS=Laccaria bicolor (strain S238N-H82) GN=LACBIDRAFT_313744 PE=4 SV=1	predicted protein [Laccaria bicolor S238N-H82]	NA	NA
G_lucidum_10001701	PF00293.1;PF05026.7;	K12613 DCP2 mRNA-decapping enzyme subunit 2 3.-.-.- Genetic Information Processing; Folding, Sorting and Degradation; RNA degradation [PATH:ko03018]	COG0494 NTP pyrophosphohydrolases including oxidative damage repair enzymes LR Replication, recombination and repair ; General function prediction only ;	DCP2_SCHPO mRNA decapping complex subunit 2 OS=Schizosaccharomyces pombe GN=dcp2 PE=1 SV=1	B0CPT0_LACBS Predicted protein OS=Laccaria bicolor (strain S238N-H82) GN=LACBIDRAFT_300645 PE=4 SV=1	predicted protein [Laccaria bicolor S238N-H82]	IPR000086; NUDIX hydrolase domain IPR007722; mRNA decapping protein 2, box A IPR015797; NUDIX hydrolase domain-like IPR020084; NUDIX hydrolase, conserved site	GO:0003723; RNA binding; Molecular Function GO:0016787; hydrolase activity; Molecular Function GO:0030145; manganese ion binding; Molecular Function
G_lucidum_10001702	PF00515.22;PF01753.12;	NA	NA	NPHP3_XENLA Nephrocystin-3 OS=Xenopus laevis GN=nphp3 PE=2 SV=1	A6SAM7_BOTFB Predicted protein OS=Botryotinia fuckeliana (strain B05.10) GN=BC1G_09831 PE=4 SV=1	hypothetical protein MELLADRAFT_61077 [Melampsora larici-populina 98AG31]	IPR001440; Tetratricopeptide TPR-1 IPR002893; Zinc finger, MYND-type IPR011990; Tetratricopeptide-like helical IPR013026; Tetratricopeptide repeat-containing IPR019734; Tetratricopeptide repeat	GO:0005488; binding; Molecular Function GO:0005515; protein binding; Molecular Function GO:0008270; zinc ion binding; Molecular Function
G_lucidum_10001703	NA	NA	NA	NA	D8PQ70_SCHCO Putative uncharacterized protein (Fragment) OS=Schizophyllum commune H4-8 GN=SCHCODRAFT_103965 PE=4 SV=1	hypothetical protein SCHCODRAFT_103965 [Schizophyllum commune H4-8]	NA	NA
G_lucidum_10001704	PF04824.10;PF04825.7;	K06670 SCC1, MCD1, RAD21 cohesin complex subunit SCC1 -- Genetic Information Processing; Replication and Repair; Chromosome [BR:ko03036] Cellular Processes; Cell Growth and Death; Cell cycle [PATH:ko04110] Cellular Processes; Cell Growth and Death; Cell cycle - yeast [PATH:ko04111]	NA	REC8_SCHPO Meiotic recombination protein rec8 OS=Schizosaccharomyces pombe GN=rec8 PE=1 SV=2	A8N1F4_COPC7 Putative uncharacterized protein OS=Coprinopsis cinerea (strain Okayama-7 / 130 / FGSC 9003) GN=CC1G_11293 PE=4 SV=2	hypothetical protein CC1G_11293 [Coprinopsis cinerea okayama7#130]	IPR006909; Rad21/Rec8-like protein, C-terminal, eukaryotic IPR006910; Rad21/Rec8-like protein, N-terminal IPR023093; Rad21/Rec8-like protein, C-terminal	GO:0000228; nuclear chromosome; Cellular Component GO:0005515; protein binding; Molecular Function
G_lucidum_10001705	PF00293.1;	K01823 E5.3.3.2, idi isopentenyl-diphosphate delta-isomerase 5.3.3.2 Metabolism; Metabolism of Terpenoids and Polyketides; Terpenoid backbone biosynthesis [PATH:ko00900]	COG1443 Isopentenyldiphosphate isomerase I Lipid transport and metabolism ;	IDI1_PHARH Isopentenyl-diphosphate Delta-isomerase OS=Phaffia rhodozyma GN=IDI PE=3 SV=1	D8PQ79_SCHCO Putative uncharacterized protein OS=Schizophyllum commune H4-8 GN=SCHCODRAFT_64487 PE=4 SV=1	hypothetical protein SCHCODRAFT_64487 [Schizophyllum commune H4-8]	IPR000086; NUDIX hydrolase domain IPR011876; Isopentenyl-diphosphate delta-isomerase, type 1 IPR015797; NUDIX hydrolase domain-like	GO:0004452; isopentenyl-diphosphate delta-isomerase activity; Molecular Function GO:0008299; isoprenoid biosynthetic process; Biological Process GO:0016787; hydrolase activity; Molecular Function
G_lucidum_10001706	NA	NA	NA	NA	B8P8P1_POSPM Predicted protein OS=Postia placenta (strain ATCC 44394 / Madison 698-R) GN=POSPLDRAFT_92048 PE=4 SV=1	predicted protein [Postia placenta Mad-698-R]	NA	NA
G_lucidum_10001707	NA	NA	NA	NA	NA	NA	NA	NA
G_lucidum_10001708	NA	NA	NA	NA	NA	NA	NA	NA
G_lucidum_10001709	NA	NA	NA	NA	NA	NA	NA	NA
G_lucidum_10001710	NA	NA	NA	NA	NA	NA	NA	NA
G_lucidum_10001711	NA	NA	NA	NA	B0CPS6_LACBS Putative uncharacterized protein OS=Laccaria bicolor (strain S238N-H82) GN=LACBIDRAFT_378866 PE=4 SV=1	hypothetical protein LACBIDRAFT_378866 [Laccaria bicolor S238N-H82]	NA	NA
G_lucidum_10001712	PF03650.7;	K11086 SNRPB, SMB small nuclear ribonucleoprotein B and B' -- Genetic Information Processing; Transcription; Spliceosome [PATH:ko03040] Genetic Information Processing; Transcription; Spliceosome [BR:ko03041] Genetic Information Processing; Replication and Repair; DNA replication proteins [BR:ko03032] Human Diseases; Immune System Diseases; Systemic lupus erythematosus [PATH:ko05322]	NA	YCYB_SCHPO UPF0041 protein C1235.11 OS=Schizosaccharomyces pombe GN=SPCC1235.11 PE=2 SV=3	B8P8P4_POSPM Predicted protein OS=Postia placenta (strain ATCC 44394 / Madison 698-R) GN=POSPLDRAFT_87845 PE=4 SV=1	predicted protein [Postia placenta Mad-698-R]	IPR005336; Uncharacterised protein family UPF0041	NA
G_lucidum_10001713	PF01068.1;PF04675.8;PF04679.9;	K10747 LIG1 DNA ligase 1 6.5.1.1 Genetic Information Processing; Replication and Repair; DNA replication [PATH:ko03030] Genetic Information Processing; Replication and Repair; DNA replication proteins [BR:ko03032] Genetic Information Processing; Replication and Repair; Base excision repair [PATH:ko03410] Genetic Information Processing; Replication and Repair; Nucleotide excision repair [PATH:ko03…	COG1793 ATP-dependent DNA ligase L Replication, recombination and repair ;	DNLI1_SCHPO DNA ligase 1 OS=Schizosaccharomyces pombe GN=cdc17 PE=2 SV=1	B0CPS5_LACBS DNA ligase OS=Laccaria bicolor (strain S238N-H82) GN=LACBIDRAFT_187450 PE=3 SV=1	predicted protein [Laccaria bicolor S238N-H82]	IPR000977; DNA ligase, ATP-dependent IPR012308; DNA ligase, ATP-dependent, N-terminal IPR012309; DNA ligase, ATP-dependent, C-terminal IPR012310; DNA ligase, ATP-dependent, central IPR012340; Nucleic acid-binding, OB-fold IPR016027; Nucleic acid-binding, OB-fold-like IPR016059; DNA ligase, ATP-dependent, conserved site	GO:0003677; DNA binding; Molecular Function GO:0003909; DNA ligase activity; Molecular Function GO:0003910; DNA ligase (ATP) activity; Molecular Function GO:0005524; ATP binding; Molecular Function GO:0006260; DNA replication; Biological Process GO:0006281; DNA repair; Biological Process GO:0006310; DNA recombination; Biological Process GO:0051103; DNA ligation involved in DNA repair; Biological …
G_lucidum_10001714	PF00366.14;	K02949 RP-S11e, RPS11 small subunit ribosomal protein S11e -- Genetic Information Processing; Translation; Ribosome [PATH:ko03010] Genetic Information Processing; Translation; Ribosome [BR:ko03011]	COG0186 Ribosomal protein S17 J Translation, ribosomal structure and biogenesis ;	RS11_SCHPO 40S ribosomal protein S11 OS=Schizosaccharomyces pombe GN=rps11a PE=2 SV=2	B8P8P5_POSPM 40S ribosomal protein S11 OS=Postia placenta (strain ATCC 44394 / Madison 698-R) GN=POSPLDRAFT_135001 PE=3 SV=1	40S ribosomal protein S11 [Postia placenta Mad-698-R]	IPR000266; Ribosomal protein S17 IPR012340; Nucleic acid-binding, OB-fold IPR016027; Nucleic acid-binding, OB-fold-like IPR019978; Ribosomal protein S17, archaeal IPR019979; Ribosomal protein S17, conserved site	GO:0003735; structural constituent of ribosome; Molecular Function GO:0005622; intracellular; Cellular Component GO:0005840; ribosome; Cellular Component GO:0006412; translation; Biological Process
G_lucidum_10001715	PF00149.22;	K01090 E3.1.3.16 protein phosphatase 3.1.3.16 Unclassified; Metabolism; Others	COG0639 Diadenosine tetraphosphatase and related serine/threonine protein phosphatases T Signal transduction mechanisms ;	PPZ_SCHPO Serine/threonine-protein phosphatase PP-Z OS=Schizosaccharomyces pombe GN=pzh1 PE=1 SV=1	D8PQ87_SCHCO Serine/threonine-protein phosphatase OS=Schizophyllum commune H4-8 GN=SCHCODRAFT_255508 PE=3 SV=1	hypothetical protein SCHCODRAFT_255508 [Schizophyllum commune H4-8]	IPR004843; Metallo-dependent phosphatase IPR006186; Serine/threonine-specific protein phosphatase/bis(5-nucleosyl)-tetraphosphatase IPR011159; Phosphoprotein phosphatase PPZ	GO:0004724; magnesium-dependent protein serine/threonine phosphatase activity; Molecular Function GO:0016787; hydrolase activity; Molecular Function GO:0048037; cofactor binding; Molecular Function
G_lucidum_10001716	PF00082.16;PF05922.10;	K01336 E3.4.21.48 cerevisin 3.4.21.48 Metabolism; Enzyme Families; Peptidases [BR:ko01002] Genetic Information Processing; Folding, Sorting and Degradation; Chaperones and folding catalysts [BR:ko03110]	COG1404 Subtilisin-like serine proteases O Posttranslational modification, protein turnover, chaperones ;	CUDP_METAN Cuticle-degrading protease OS=Metarhizium anisopliae GN=PR1 PE=1 SV=1	A1YZF0_9AGAR Serine protease OS=Hypsizygus marmoreus PE=2 SV=2	serine protease [Hypsizygus marmoreus]	IPR000209; Peptidase S8/S53, subtilisin/kexin/sedolisin IPR009020; Proteinase inhibitor, propeptide IPR010259; Proteinase inhibitor I9, subtilisin propeptide IPR015500; Peptidase S8, subtilisin-related IPR022398; Peptidase S8/S53, subtilisin, active site	GO:0004252; serine-type endopeptidase activity; Molecular Function GO:0006508; proteolysis; Biological Process GO:0042802; identical protein binding; Molecular Function GO:0043086; negative regulation of catalytic activity; Biological Process
G_lucidum_10001717	PF00892.14;PF00186.13;	K00287 folA dihydrofolate reductase 1.5.1.3 Metabolism; Metabolism of Cofactors and Vitamins; Folate biosynthesis [PATH:ko00790] Metabolism; Metabolism of Cofactors and Vitamins; One carbon pool by folate [PATH:ko00670]	COG0262 Dihydrofolate reductase H Coenzyme transport and metabolism ;	DYR_CRYNE Dihydrofolate reductase OS=Cryptococcus neoformans GN=DFR1 PE=1 SV=1	B0CPS2_LACBS Predicted protein OS=Laccaria bicolor (strain S238N-H82) GN=LACBIDRAFT_192395 PE=4 SV=1	predicted protein [Laccaria bicolor S238N-H82]	IPR000620; Drug/metabolite transporter IPR001796; Dihydrofolate reductase domain IPR012259; Dihydrofolate reductase IPR017925; Dihydrofolate reductase conserved site	GO:0004146; dihydrofolate reductase activity; Molecular Function GO:0006545; glycine biosynthetic process; Biological Process GO:0009165; nucleotide biosynthetic process; Biological Process GO:0016020; membrane; Cellular Component GO:0050661; NADP or NADPH binding; Molecular Function GO:0055114; oxidation-reduction process; Biological Process
G_lucidum_10001718	PF00444.12;	K02919 RP-L36, rpmJ large subunit ribosomal protein L36 -- Genetic Information Processing; Translation; Ribosome [PATH:ko03010] Genetic Information Processing; Translation; Ribosome [BR:ko03011]	COG0257 Ribosomal protein L36 J Translation, ribosomal structure and biogenesis ;	YP18B_YEAST 54S ribosomal protein YPL183W-A, mitochondrial OS=Saccharomyces cerevisiae GN=YPL183W-A PE=1 SV=1	D8PQ89_SCHCO Putative uncharacterized protein OS=Schizophyllum commune H4-8 GN=SCHCODRAFT_48784 PE=3 SV=1	hypothetical protein PGTG_06911 [Puccinia graminis f. sp. tritici CRL 75-36-700-3]	IPR000473; Ribosomal protein L36	GO:0003735; structural constituent of ribosome; Molecular Function GO:0005622; intracellular; Cellular Component GO:0005840; ribosome; Cellular Component GO:0006412; translation; Biological Process
G_lucidum_10001719	PF04479.7;	NA	NA	RSB1_YEAS2 Sphingoid long-chain base transporter RSB1 OS=Saccharomyces cerevisiae (strain JAY291) GN=RSB1 PE=2 SV=2	A8P838_COPC7 Putative uncharacterized protein OS=Coprinopsis cinerea (strain Okayama-7 / 130 / FGSC 9003) GN=CC1G_06708 PE=4 SV=1	hypothetical protein CC1G_06708 [Coprinopsis cinerea okayama7#130]	IPR007568; RTA-like protein	GO:0006950; response to stress; Biological Process GO:0016021; integral to membrane; Cellular Component
G_lucidum_10001720	PF05002.9;PF04969.10;	K12795 SUGT1, SGT1 suppressor of G2 allele of SKP1 -- Organismal Systems; Immune System; NOD-like receptor signaling pathway [PATH:ko04621] Organismal Systems; Environmental Adaptation; Plant-pathogen interaction [PATH:ko04626]	COG5091 Suppressor of G2 allele of skp1 and related proteins R General function prediction only ;	GIT7_SCHPO Glucose-insensitive transcription protein 7 OS=Schizosaccharomyces pombe GN=git7 PE=2 SV=2	B0CPR9_LACBS Predicted protein OS=Laccaria bicolor (strain S238N-H82) GN=LACBIDRAFT_187057 PE=4 SV=1	predicted protein [Laccaria bicolor S238N-H82]	IPR007052; CS-like domain IPR007699; SGS IPR008978; HSP20-like chaperone IPR017447; CS domain	NA
G_lucidum_10001721	NA	NA	NA	NA	B0CPR7_LACBS Glycosyltransferase family 31 protein OS=Laccaria bicolor (strain S238N-H82) GN=LACBIDRAFT_300631 PE=4 SV=1	glycosyltransferase family 31 protein [Laccaria bicolor S238N-H82]	IPR002659; Glycosyl transferase, family 31 IPR004045; Glutathione S-transferase, N-terminal IPR010987; Glutathione S-transferase, C-terminal-like IPR012335; Thioredoxin fold IPR012336; Thioredoxin-like fold IPR017933; Glutathione S-transferase/chloride channel, C-terminal	GO:0005515; protein binding; Molecular Function GO:0006486; protein glycosylation; Biological Process GO:0008378; galactosyltransferase activity; Molecular Function GO:0016020; membrane; Cellular Component
G_lucidum_10001722	NA	NA	NA	NA	B0CPR6_LACBS Predicted protein OS=Laccaria bicolor (strain S238N-H82) GN=LACBIDRAFT_300630 PE=4 SV=1	predicted protein [Laccaria bicolor S238N-H82]	NA	NA
G_lucidum_10001723	NA	NA	NA	NA	NA	NA	NA	NA
G_lucidum_10001724	NA	NA	NA	NA	B0CPR5_LACBS Predicted protein OS=Laccaria bicolor (strain S238N-H82) GN=LACBIDRAFT_300629 PE=4 SV=1	predicted protein [Laccaria bicolor S238N-H82]	NA	NA
G_lucidum_10001725	PF00857.14;PF00107.20;	K00001 E1.1.1.1, adh alcohol dehydrogenase 1.1.1.1 Metabolism; Carbohydrate Metabolism; Glycolysis / Gluconeogenesis [PATH:ko00010] Metabolism; Lipid Metabolism; Fatty acid metabolism [PATH:ko00071] Metabolism; Amino Acid Metabolism; Tyrosine metabolism [PATH:ko00350] Metabolism; Metabolism of Cofactors and Vitamins; Retinol metabolism [PATH:ko00830] Metabolism; Xenobiotics Biodegradation and Met…	COG0604 NADPH:quinone reductase and related Zn-dependent oxidoreductases CR Energy production and conversion ; General function prediction only ;	YBI2_SCHPO Zinc-type alcohol dehydrogenase-like protein C16A3.02c OS=Schizosaccharomyces pombe GN=SPBC16A3.02c PE=2 SV=1	B8P0P4_POSPM Predicted protein OS=Postia placenta (strain ATCC 44394 / Madison 698-R) GN=POSPLDRAFT_88841 PE=4 SV=1	predicted protein [Postia placenta Mad-698-R]	IPR000868; Isochorismatase-like IPR002085; Alcohol dehydrogenase superfamily, zinc-containing IPR011032; GroES-like IPR013149; Alcohol dehydrogenase, C-terminal IPR020843; Polyketide synthase, enoylreductase	GO:0003824; catalytic activity; Molecular Function GO:0008152; metabolic process; Biological Process GO:0008270; zinc ion binding; Molecular Function GO:0016491; oxidoreductase activity; Molecular Function GO:0016747; transferase activity, transferring acyl groups other than amino-acyl groups; Molecular Function GO:0055114; oxidation-reduction process; Biological Process
G_lucidum_10001726	NA	NA	NA	NA	B0CPR5_LACBS Predicted protein OS=Laccaria bicolor (strain S238N-H82) GN=LACBIDRAFT_300629 PE=4 SV=1	predicted protein [Laccaria bicolor S238N-H82]	NA	NA
G_lucidum_10001727	PF00071.16;	K07976 RAB Rab family, other -- Environmental Information Processing; Signaling Molecules and Interaction; GTP-binding proteins [BR:ko04031]	NA	RAB4A_RAT Ras-related protein Rab-4A OS=Rattus norvegicus GN=Rab4a PE=2 SV=2	B0CPR3_LACBS Predicted protein OS=Laccaria bicolor (strain S238N-H82) GN=LACBIDRAFT_181778 PE=3 SV=1	predicted protein [Laccaria bicolor S238N-H82]	IPR001806; Ras GTPase IPR002041; Ran GTPase IPR003577; Ras small GTPase, Ras type IPR003578; Small GTPase, Rho type IPR003579; Ras small GTPase, Rab type IPR005225; Small GTP-binding protein IPR013753; Ras IPR020851; Small GTPase	GO:0003924; GTPase activity; Molecular Function GO:0005525; GTP binding; Molecular Function GO:0005622; intracellular; Cellular Component GO:0006886; intracellular protein transport; Biological Process GO:0006913; nucleocytoplasmic transport; Biological Process GO:0007165; signal transduction; Biological Process GO:0007264; small GTPase mediated signal transduction; Biological Process GO:0015031;…
G_lucidum_10001728	PF04479.7;	NA	NA	YEO2_SCHPO Uncharacterized protein C17G6.02c OS=Schizosaccharomyces pombe GN=SPAC17G6.02c PE=2 SV=1	D8QEF7_SCHCO Putative uncharacterized protein (Fragment) OS=Schizophyllum commune H4-8 GN=SCHCODRAFT_37561 PE=4 SV=1	hypothetical protein SCHCODRAFT_37561 [Schizophyllum commune H4-8]	IPR007568; RTA-like protein	GO:0006950; response to stress; Biological Process GO:0016021; integral to membrane; Cellular Component
G_lucidum_10001729	NA	NA	NA	NA	B8PIM1_POSPM Predicted protein OS=Postia placenta (strain ATCC 44394 / Madison 698-R) GN=POSPLDRAFT_93649 PE=4 SV=1	predicted protein [Postia placenta Mad-698-R]	NA	NA
G_lucidum_10001730	PF00270.23;PF00271.25;	K03654 recQ ATP-dependent DNA helicase RecQ 3.6.1.- Genetic Information Processing; Folding, Sorting and Degradation; RNA degradation [PATH:ko03018] Genetic Information Processing; Replication and Repair; DNA repair and recombination proteins [BR:ko03400]	COG0514 Superfamily II DNA helicase L Replication, recombination and repair ;	RQL3_ARATH ATP-dependent DNA helicase Q-like 3 OS=Arabidopsis thaliana GN=RECQL3 PE=1 SV=1	A8P8F3_COPC7 Putative uncharacterized protein OS=Coprinopsis cinerea (strain Okayama-7 / 130 / FGSC 9003) GN=CC1G_12869 PE=4 SV=2	hypothetical protein CC1G_12869 [Coprinopsis cinerea okayama7#130]	IPR001650; Helicase, C-terminal IPR004589; DNA helicase, ATP-dependent, RecQ type IPR011545; DNA/RNA helicase, DEAD/DEAH box type, N-terminal IPR014021; Helicase, superfamily 1/2, ATP-binding domain	GO:0003676; nucleic acid binding; Molecular Function GO:0004386; helicase activity; Molecular Function GO:0005524; ATP binding; Molecular Function GO:0006310; DNA recombination; Biological Process GO:0008026; ATP-dependent helicase activity; Molecular Function
G_lucidum_10000290	NA	NA	NA	NA	NA	NA	NA	NA
G_lucidum_10000291	NA	NA	NA	NA	NA	NA	NA	NA
G_lucidum_10000292	PF00331.14;	K01181 E3.2.1.8, xynA endo-1,4-beta-xylanase 3.2.1.8 Unclassified; Metabolism; Carbohydrate metabolism	COG3693 Beta-1,4-xylanase G Carbohydrate transport and metabolism ;	XLNA_AGABI Endo-1,4-beta-xylanase OS=Agaricus bisporus GN=xlnA PE=2 SV=1	B8P421_POSPM Endo-1,4-beta-xylanase OS=Postia placenta (strain ATCC 44394 / Madison 698-R) GN=POSPLDRAFT_134784 PE=3 SV=1	endo-1,4-beta-xylanase [Postia placenta Mad-698-R]	IPR001000; Glycoside hydrolase, family 10 IPR013781; Glycoside hydrolase, subgroup, catalytic core IPR017853; Glycoside hydrolase, catalytic core	GO:0003824; catalytic activity; Molecular Function GO:0004553; hydrolase activity, hydrolyzing O-glycosyl compounds; Molecular Function GO:0005975; carbohydrate metabolic process; Biological Process GO:0043169; cation binding; Molecular Function
G_lucidum_10001401	NA	K07497 K07497 putative transposase -- Unclassified; Genetic Information Processing; Replication, recombination and repair proteins	COG2801 Transposase and inactivated derivatives L Replication, recombination and repair ;	YG31B_YEAST Transposon Ty3-G Gag-Pol polyprotein OS=Saccharomyces cerevisiae GN=TY3B-G PE=1 SV=3	Q45W61_PHACH Polyprotein (Fragment) OS=Phanerochaete chrysosporium RP-78 GN=pol PE=4 SV=1	polyprotein [Phanerochaete chrysosporium RP-78]	NA	NA
G_lucidum_10001402	PF03732.11;	NA	NA	NA	Q45W62_PHACH Gag (Fragment) OS=Phanerochaete chrysosporium RP-78 GN=gag PE=4 SV=1	Gag [Phanerochaete chrysosporium RP-78]	IPR001878; Zinc finger, CCHC-type IPR005162; Retrotransposon gag protein IPR013084; Zinc finger, CCHC retroviral-type	GO:0003676; nucleic acid binding; Molecular Function GO:0008270; zinc ion binding; Molecular Function
G_lucidum_10001403	NA	NA	NA	NA	B8PJF3_POSPM Predicted protein OS=Postia placenta (strain ATCC 44394 / Madison 698-R) GN=POSPLDRAFT_105844 PE=4 SV=1	predicted protein [Postia placenta Mad-698-R]	NA	NA
G_lucidum_10001404	PF00069.19;	K04371 ERK1_2 extracellular signal-regulated kinase 1/2 2.7.11.24 Metabolism; Enzyme Families; Protein kinases [BR:ko01001] Genetic Information Processing; Replication and Repair; Chromosome [BR:ko03036] Environmental Information Processing; Signal Transduction; MAPK signaling pathway [PATH:ko04010] Environmental Information Processing; Signal Transduction; MAPK signaling pathway - fly [PATH:ko04…	NA	MAPK_FUSSO Mitogen-activated protein kinase OS=Fusarium solani subsp. pisi GN=MAPK PE=2 SV=1	B8P7P9_POSPM Mitogen activated protein kinase-like protein OS=Postia placenta (strain ATCC 44394 / Madison 698-R) GN=POSPLDRAFT_46675 PE=4 SV=1	mitogen activated protein kinase-like protein [Postia placenta Mad-698-R]	IPR000719; Protein kinase, catalytic domain IPR002290; Serine/threonine-protein kinase domain IPR003527; MAP kinase, conserved site IPR008271; Serine/threonine-protein kinase, active site IPR008352; MAP kinase, p38 IPR011009; Protein kinase-like domain IPR017441; Protein kinase, ATP binding site IPR017442; Serine/threonine-protein kinase-like domain IPR020635; Tyrosine-protein kinase, catalytic d…	GO:0004672; protein kinase activity; Molecular Function GO:0004674; protein serine/threonine kinase activity; Molecular Function GO:0004707; MAP kinase activity; Molecular Function GO:0005524; ATP binding; Molecular Function GO:0006468; protein phosphorylation; Biological Process
G_lucidum_10001405	NA	NA	NA	NA	NA	NA	NA	NA
G_lucidum_10001406	PF00076.16;	K13126 PABPC1 polyadenylate-binding protein 1 -- Genetic Information Processing; Transcription; Spliceosome [BR:ko03041]	NA	PABP_LODEL Polyadenylate-binding protein, cytoplasmic and nuclear OS=Lodderomyces elongisporus GN=PAB1 PE=3 SV=1	A8NCM2_COPC7 Putative uncharacterized protein OS=Coprinopsis cinerea (strain Okayama-7 / 130 / FGSC 9003) GN=CC1G_03580 PE=4 SV=2	hypothetical protein CC1G_03580 [Coprinopsis cinerea okayama7#130]	IPR000504; RNA recognition motif domain IPR002004; Polyadenylate-binding protein/Hyperplastic disc protein IPR012677; Nucleotide-binding, alpha-beta plait	GO:0000166; nucleotide binding; Molecular Function GO:0003676; nucleic acid binding; Molecular Function GO:0003723; RNA binding; Molecular Function
G_lucidum_10001407	NA	NA	NA	NA	NA	NA	NA	NA
G_lucidum_10001408	NA	NA	NA	NA	NA	NA	NA	NA
G_lucidum_10001409	NA	NA	NA	NA	B0E0Z8_LACBS Predicted protein OS=Laccaria bicolor (strain S238N-H82) GN=LACBIDRAFT_334986 PE=4 SV=1	predicted protein [Laccaria bicolor S238N-H82]	NA	NA
G_lucidum_10001410	PF02582.8;	NA	COG1723 Uncharacterized conserved protein S Function unknown ;	RMD8_YEAST Sporulation protein RMD8 OS=Saccharomyces cerevisiae GN=RMD8 PE=1 SV=1	D8QHE9_SCHCO Putative uncharacterized protein OS=Schizophyllum commune H4-8 GN=SCHCODRAFT_258564 PE=4 SV=1	hypothetical protein SCHCODRAFT_258564 [Schizophyllum commune H4-8]	IPR003734; Protein of unknown function DUF155	NA
G_lucidum_10001411	PF00270.23;PF00271.25;	K01529 E3.6.1.- -- -- Unclassified; Metabolism; Others	NA	MAK5_CRYNE ATP-dependent RNA helicase MAK5 OS=Cryptococcus neoformans GN=MAK5 PE=3 SV=1	D8QHD9_SCHCO Putative uncharacterized protein OS=Schizophyllum commune H4-8 GN=SCHCODRAFT_70633 PE=3 SV=1	hypothetical protein SCHCODRAFT_70633 [Schizophyllum commune H4-8]	IPR000629; RNA helicase, ATP-dependent, DEAD-box, conserved site IPR001650; Helicase, C-terminal IPR011545; DNA/RNA helicase, DEAD/DEAH box type, N-terminal IPR014001; DEAD-like helicase, N-terminal IPR014014; RNA helicase, DEAD-box type, Q motif IPR014021; Helicase, superfamily 1/2, ATP-binding domain	GO:0003676; nucleic acid binding; Molecular Function GO:0004386; helicase activity; Molecular Function GO:0005524; ATP binding; Molecular Function GO:0008026; ATP-dependent helicase activity; Molecular Function
G_lucidum_10001412	NA	NA	NA	NA	B0DRJ1_LACBS Predicted protein OS=Laccaria bicolor (strain S238N-H82) GN=LACBIDRAFT_332089 PE=4 SV=1	predicted protein [Laccaria bicolor S238N-H82]	IPR016181; Acyl-CoA N-acyltransferase	NA
G_lucidum_10001413	NA	K07494 K07494 putative transposase -- Unclassified; Genetic Information Processing; Replication, recombination and repair proteins	COG3335 Transposase and inactivated derivatives L Replication, recombination and repair ;	NA	C9K7F5_ALTAL Similar to Tc1-mariner class transposase OS=Alternaria alternata GN=TLS14 PE=4 SV=1	similar to Tc1-mariner class transposase [Alternaria alternata]	IPR004875; DDE superfamily endonuclease, CENP-B-like IPR009057; Homeodomain-like	GO:0003676; nucleic acid binding; Molecular Function GO:0005515; protein binding; Molecular Function
G_lucidum_10001414	NA	K07494 K07494 putative transposase -- Unclassified; Genetic Information Processing; Replication, recombination and repair proteins	COG3335 Transposase and inactivated derivatives L Replication, recombination and repair ;	NA	C9K7F5_ALTAL Similar to Tc1-mariner class transposase OS=Alternaria alternata GN=TLS14 PE=4 SV=1	similar to Tc1-mariner class transposase [Alternaria alternata]	IPR004875; DDE superfamily endonuclease, CENP-B-like IPR009057; Homeodomain-like	GO:0003676; nucleic acid binding; Molecular Function GO:0005515; protein binding; Molecular Function
G_lucidum_10001415	NA	NA	NA	NA	B8P0E4_POSPM Predicted protein OS=Postia placenta (strain ATCC 44394 / Madison 698-R) GN=POSPLDRAFT_103531 PE=4 SV=1	predicted protein [Postia placenta Mad-698-R]	NA	NA
G_lucidum_10001416	PF06985.5;	NA	NA	HETE1_PODAN Vegetative incompatibility protein HET-E-1 OS=Podospora anserina GN=HET-E1 PE=4 SV=1	C7YVC9_NECH7 Putative uncharacterized protein OS=Nectria haematococca (strain 77-13-4 / FGSC 9596 / MPVI) GN=NECHADRAFT_101749 PE=4 SV=1	hypothetical protein NECHADRAFT_101749 [Nectria haematococca mpVI 77-13-4]	IPR010730; Heterokaryon incompatibility	NA
G_lucidum_10001417	PF00583.18;	K00657 E2.3.1.57, speG diamine N-acetyltransferase 2.3.1.57 Metabolism; Amino Acid Metabolism; Arginine and proline metabolism [PATH:ko00330]	NA	SAT2_BOVIN Diamine acetyltransferase 2 OS=Bos taurus GN=SAT2 PE=2 SV=1	B8P7M4_POSPM Predicted protein OS=Postia placenta (strain ATCC 44394 / Madison 698-R) GN=POSPLDRAFT_93389 PE=4 SV=1	predicted protein [Postia placenta Mad-698-R]	IPR000182; GCN5-related N-acetyltransferase (GNAT) domain IPR016181; Acyl-CoA N-acyltransferase	GO:0008080; N-acetyltransferase activity; Molecular Function GO:0008152; metabolic process; Biological Process
G_lucidum_10001418	PF01849.12;	K01527 EGD1, BTF3 nascent polypeptide-associated complex subunit beta -- Unclassified; Genetic Information Processing; Protein folding and associated processing	NA	NACB_ASPTN Nascent polypeptide-associated complex subunit beta OS=Aspergillus terreus (strain NIH 2624 / FGSC A1156) GN=egd1 PE=3 SV=1	A8NC95_COPC7 Nascent polypeptide-associated complex subunit beta OS=Coprinopsis cinerea (strain Okayama-7 / 130 / FGSC 9003) GN=CC1G_11064 PE=4 SV=1	nascent polypeptide-associated complex subunit beta [Coprinopsis cinerea okayama7#130]	IPR002715; Nascent polypeptide-associated complex NAC	NA
G_lucidum_10001419	PF00400.26;	K11127 TEP1 telomerase protein component 1 -- Genetic Information Processing; Replication and Repair; DNA replication proteins [BR:ko03032]	NA	YE85_SCHPO Uncharacterized WD repeat-containing protein C9G1.05 OS=Schizosaccharomyces pombe GN=SPAC9G1.05 PE=2 SV=1	D8QHN7_SCHCO Putative uncharacterized protein OS=Schizophyllum commune H4-8 GN=SCHCODRAFT_70703 PE=4 SV=1	hypothetical protein SCHCODRAFT_70703 [Schizophyllum commune H4-8]	IPR001680; WD40 repeat IPR011046; WD40 repeat-like-containing domain IPR015943; WD40/YVTN repeat-like-containing domain IPR017986; WD40-repeat-containing domain IPR019775; WD40 repeat, conserved site IPR019781; WD40 repeat, subgroup IPR019782; WD40 repeat 2 IPR020472; G-protein beta WD-40 repeat	GO:0005515; protein binding; Molecular Function
G_lucidum_10001420	PF08311.6;	K06680 MAD3 spindle assembly checkpoint component MAD3 -- Cellular Processes; Cell Growth and Death; Cell cycle - yeast [PATH:ko04111]	NA	MAD3_SCHPO Mitotic spindle checkpoint component mad3 OS=Schizosaccharomyces pombe GN=mad3 PE=1 SV=2	A8NCL3_COPC7 Other/BUB protein kinase OS=Coprinopsis cinerea (strain Okayama-7 / 130 / FGSC 9003) GN=CC1G_03571 PE=4 SV=1	other/BUB protein kinase [Coprinopsis cinerea okayama7#130]	IPR013212; Mad3/BUB1 homology region 1 IPR015661; Mitotic checkpoint serine/threonine protein kinase, Bub1	NA
G_lucidum_10001421	PF00082.16;PF09286.5;	K01279 TPP1, CLN2 tripeptidyl-peptidase I 3.4.14.9 Metabolism; Enzyme Families; Peptidases [BR:ko01002] Genetic Information Processing; Folding, Sorting and Degradation; Chaperones and folding catalysts [BR:ko03110] Cellular Processes; Transport and Catabolism; Lysosome [PATH:ko04142]	COG4934 Predicted protease O Posttranslational modification, protein turnover, chaperones ;	SED3_ASPFU Tripeptidyl-peptidase sed3 OS=Aspergillus fumigatus GN=sed3 PE=1 SV=1	B8PJX5_POSPM Family S53 protease-like protein OS=Postia placenta (strain ATCC 44394 / Madison 698-R) GN=POSPLDRAFT_98402 PE=4 SV=1	family S53 protease-like protein [Postia placenta Mad-698-R]	IPR000209; Peptidase S8/S53, subtilisin/kexin/sedolisin IPR009020; Proteinase inhibitor, propeptide IPR015366; Peptidase S53, propeptide	GO:0004252; serine-type endopeptidase activity; Molecular Function GO:0006508; proteolysis; Biological Process GO:0008236; serine-type peptidase activity; Molecular Function
G_lucidum_10001422	PF00082.16;PF09286.5;	K01279 TPP1, CLN2 tripeptidyl-peptidase I 3.4.14.9 Metabolism; Enzyme Families; Peptidases [BR:ko01002] Genetic Information Processing; Folding, Sorting and Degradation; Chaperones and folding catalysts [BR:ko03110] Cellular Processes; Transport and Catabolism; Lysosome [PATH:ko04142]	COG4934 Predicted protease O Posttranslational modification, protein turnover, chaperones ;	SED2_ASPFU Tripeptidyl-peptidase sed2 OS=Aspergillus fumigatus GN=sed2 PE=1 SV=1	B8PMI5_POSPM Family S53 protease-like protein OS=Postia placenta (strain ATCC 44394 / Madison 698-R) GN=POSPLDRAFT_89318 PE=4 SV=1	family S53 protease-like protein [Postia placenta Mad-698-R]	IPR000209; Peptidase S8/S53, subtilisin/kexin/sedolisin IPR009020; Proteinase inhibitor, propeptide IPR015366; Peptidase S53, propeptide IPR022398; Peptidase S8/S53, subtilisin, active site	GO:0004252; serine-type endopeptidase activity; Molecular Function GO:0006508; proteolysis; Biological Process GO:0008236; serine-type peptidase activity; Molecular Function
G_lucidum_10000031	NA	NA	NA	NA	NA	NA	NA	NA
G_lucidum_10000206	PF12695.1;	K01054 MGLL acylglycerol lipase 3.1.1.23 Metabolism; Lipid Metabolism; Glycerolipid metabolism [PATH:ko00561] Metabolism; Enzyme Families; Peptidases [BR:ko01002]	COG2267 Lysophospholipase I Lipid transport and metabolism ;	YJI5_SCHPO Probable serine hydrolase C5E4.05c OS=Schizosaccharomyces pombe GN=SPCC5E4.05c PE=1 SV=1	B8P5G9_POSPM Hypothetical lysophospholipase OS=Postia placenta (strain ATCC 44394 / Madison 698-R) GN=POSPLDRAFT_122692 PE=4 SV=1	hypothetical lysophospholipase [Postia placenta Mad-698-R]	NA	NA
G_lucidum_10000482	NA	NA	NA	NA	NA	NA	NA	NA
G_lucidum_10000483	PF07690.10;	K08187 SLC16A10 MFS transporter, MCP family, solute carrier family 16 (monocarboxylic acid transporters), member 10 -- Environmental Information Processing; Membrane Transport; Transporters [BR:ko02000]	NA	MCH5_YEAST Riboflavin transporter MCH5 OS=Saccharomyces cerevisiae GN=MCH5 PE=1 SV=1	D8PUB8_SCHCO Putative uncharacterized protein OS=Schizophyllum commune H4-8 GN=SCHCODRAFT_255825 PE=4 SV=1	hypothetical protein SCHCODRAFT_255825 [Schizophyllum commune H4-8]	IPR011701; Major facilitator superfamily MFS-1 IPR016196; Major facilitator superfamily, general substrate transporter	GO:0055085; transmembrane transport; Biological Process
G_lucidum_10000484	PF00067.16;	K00517 E1.14.-.- -- -- Metabolism; Metabolism of Terpenoids and Polyketides; Limonene and pinene degradation [PATH:ko00903] Metabolism; Biosynthesis of Other Secondary Metabolites; Stilbenoid, diarylheptanoid and gingerol biosynthesis [PATH:ko00945] Metabolism; Xenobiotics Biodegradation and Metabolism; gamma-Hexachlorocyclohexane degradation [PATH:ko00361] Metabolism; Xenobiotics Biodegradation …	COG2124 Cytochrome P450 Q Secondary metabolites biosynthesis, transport and catabolism ;	CP67_UROFA Cytochrome P450 67 (Fragment) OS=Uromyces fabae GN=CYP67 PE=2 SV=1	Q2VR02_PHACH High nitrogen upregulated cytochrome P450 monooxygenase 2 OS=Phanerochaete chrysosporium PE=2 SV=1	high nitrogen upregulated cytochrome P450 monooxygenase 2 [Phanerochaete chrysosporium]	IPR001128; Cytochrome P450 IPR002401; Cytochrome P450, E-class, group I	GO:0004497; monooxygenase activity; Molecular Function GO:0005506; iron ion binding; Molecular Function GO:0009055; electron carrier activity; Molecular Function GO:0020037; heme binding; Molecular Function GO:0055114; oxidation-reduction process; Biological Process
G_lucidum_10000485	NA	NA	NA	NA	B8P4Z1_POSPM Predicted protein OS=Postia placenta (strain ATCC 44394 / Madison 698-R) GN=POSPLDRAFT_106348 PE=4 SV=1	predicted protein [Postia placenta Mad-698-R]	NA	NA
G_lucidum_10000486	PF05368.7;	NA	NA	NA	B8P4Z7_POSPM Predicted protein OS=Postia placenta (strain ATCC 44394 / Madison 698-R) GN=POSPLDRAFT_106362 PE=4 SV=1	predicted protein [Postia placenta Mad-698-R]	IPR008030; NmrA-like IPR016040; NAD(P)-binding domain	GO:0003824; catalytic activity; Molecular Function GO:0005488; binding; Molecular Function GO:0008152; metabolic process; Biological Process
G_lucidum_10000755	NA	NA	NA	NA	NA	NA	NA	NA
G_lucidum_10000756	PF00149.22;PF05011.7;PF01753.12;	K01175 E3.1.-.- -- -- Unclassified; Metabolism; Others	NA	DBR1_DROPS Lariat debranching enzyme OS=Drosophila pseudoobscura pseudoobscura GN=DBR1 PE=3 SV=2	B8P6P7_POSPM Predicted protein OS=Postia placenta (strain ATCC 44394 / Madison 698-R) GN=POSPLDRAFT_99089 PE=4 SV=1	predicted protein [Postia placenta Mad-698-R]	IPR002893; Zinc finger, MYND-type IPR004843; Metallo-dependent phosphatase IPR007708; Lariat debranching enzyme, C-terminal	GO:0006397; mRNA processing; Biological Process GO:0008270; zinc ion binding; Molecular Function GO:0016787; hydrolase activity; Molecular Function GO:0016788; hydrolase activity, acting on ester bonds; Molecular Function
G_lucidum_10000757	NA	NA	NA	NA	A8N557_COPC7 Putative uncharacterized protein OS=Coprinopsis cinerea (strain Okayama-7 / 130 / FGSC 9003) GN=CC1G_04664 PE=4 SV=1	hypothetical protein CC1G_04664 [Coprinopsis cinerea okayama7#130]	NA	NA
G_lucidum_10000758	PF04427.12;	K01873 VARS, valS valyl-tRNA synthetase 6.1.1.9 Metabolism; Amino Acid Metabolism; Valine, leucine and isoleucine biosynthesis [PATH:ko00290] Genetic Information Processing; Translation; Aminoacyl-tRNA biosynthesis [PATH:ko00970]	COG5106 Uncharacterized conserved protein S Function unknown ;	RPF2_SCHPO Ribosome production factor 2 homolog OS=Schizosaccharomyces pombe GN=SPAC926.08c PE=1 SV=1	B0DKI1_LACBS Predicted protein OS=Laccaria bicolor (strain S238N-H82) GN=LACBIDRAFT_303856 PE=4 SV=1	predicted protein [Laccaria bicolor S238N-H82]	IPR007109; Brix domain	NA
G_lucidum_10000759	NA	NA	NA	NA	A8PFW9_COPC7 Putative uncharacterized protein OS=Coprinopsis cinerea (strain Okayama-7 / 130 / FGSC 9003) GN=CC1G_04879 PE=4 SV=1	hypothetical protein CC1G_04879 [Coprinopsis cinerea okayama7#130]	NA	NA
G_lucidum_10000760	NA	NA	NA	NA	NA	NA	NA	NA
G_lucidum_10000761	NA	NA	NA	NA	NA	NA	IPR011009; Protein kinase-like domain	NA
G_lucidum_10000624	NA	NA	NA	NA	NA	NA	NA	NA
G_lucidum_10000625	NA	NA	NA	NA	D8PMF6_SCHCO Putative uncharacterized protein OS=Schizophyllum commune H4-8 GN=SCHCODRAFT_84023 PE=4 SV=1	hypothetical protein SCHCODRAFT_84023 [Schizophyllum commune H4-8]	NA	NA
G_lucidum_10000626	NA	NA	NA	NA	B8PKX1_POSPM Predicted protein OS=Postia placenta (strain ATCC 44394 / Madison 698-R) GN=POSPLDRAFT_98776 PE=4 SV=1	predicted protein [Postia placenta Mad-698-R]	NA	NA
G_lucidum_10000627	PF00331.14;	K01181 E3.2.1.8, xynA endo-1,4-beta-xylanase 3.2.1.8 Unclassified; Metabolism; Carbohydrate metabolism	COG3693 Beta-1,4-xylanase G Carbohydrate transport and metabolism ;	XLNA_AGABI Endo-1,4-beta-xylanase OS=Agaricus bisporus GN=xlnA PE=2 SV=1	Q9HEZ2_PHACH Endo-1,4-B-xylanase A OS=Phanerochaete chrysosporium GN=xynA PE=3 SV=1	endo-1,4-B-xylanase A [Phanerochaete chrysosporium]	IPR001000; Glycoside hydrolase, family 10 IPR013781; Glycoside hydrolase, subgroup, catalytic core IPR017853; Glycoside hydrolase, catalytic core	GO:0003824; catalytic activity; Molecular Function GO:0004553; hydrolase activity, hydrolyzing O-glycosyl compounds; Molecular Function GO:0005975; carbohydrate metabolic process; Biological Process GO:0043169; cation binding; Molecular Function
G_lucidum_10000628	NA	K01181 E3.2.1.8, xynA endo-1,4-beta-xylanase 3.2.1.8 Unclassified; Metabolism; Carbohydrate metabolism	NA	XLNA_AGABI Endo-1,4-beta-xylanase OS=Agaricus bisporus GN=xlnA PE=2 SV=1	Q9HEZ2_PHACH Endo-1,4-B-xylanase A OS=Phanerochaete chrysosporium GN=xynA PE=3 SV=1	endo-1,4-B-xylanase A [Phanerochaete chrysosporium]	IPR013781; Glycoside hydrolase, subgroup, catalytic core	GO:0003824; catalytic activity; Molecular Function GO:0005975; carbohydrate metabolic process; Biological Process GO:0043169; cation binding; Molecular Function
G_lucidum_10000163	NA	NA	NA	NA	NA	NA	NA	NA
G_lucidum_10000164	NA	NA	NA	NA	B0D158_LACBS Drug:h+ antiporter OS=Laccaria bicolor (strain S238N-H82) GN=LACBIDRAFT_189025 PE=4 SV=1	drug:h+ antiporter [Laccaria bicolor S238N-H82]	NA	NA
G_lucidum_10000293	NA	K03379 E1.14.13.22 cyclohexanone monooxygenase 1.14.13.22 Metabolism; Xenobiotics Biodegradation and Metabolism; Caprolactam degradation [PATH:ko00930]	COG2072 Predicted flavoprotein involved in K+ transport P Inorganic ion transport and metabolism ;	STCW_EMENI Putative sterigmatocystin biosynthesis monooxygenase stcW OS=Emericella nidulans GN=stcW PE=3 SV=1	D8PMF7_SCHCO Putative uncharacterized protein OS=Schizophyllum commune H4-8 GN=SCHCODRAFT_255301 PE=4 SV=1	hypothetical protein SCHCODRAFT_255301 [Schizophyllum commune H4-8]	NA	NA
G_lucidum_10000294	NA	NA	NA	NA	NA	NA	NA	NA
G_lucidum_10000070	NA	NA	NA	NA	B8P917_POSPM Predicted protein OS=Postia placenta (strain ATCC 44394 / Madison 698-R) GN=POSPLDRAFT_95992 PE=4 SV=1	predicted protein [Postia placenta Mad-698-R]	NA	NA
G_lucidum_10000194	NA	NA	NA	NA	D4AK52_ARTBC Putative uncharacterized protein OS=Arthroderma benhamiae (strain CBS 112371) GN=ARB_04653 PE=4 SV=1	conserved hypothetical protein [Arthroderma benhamiae CBS 112371]	IPR023114; Elongated TPR repeat-containing domain	NA
G_lucidum_10003098	PF00561.1;	K01423 E3.4.-.- -- -- Metabolism; Amino Acid Metabolism; Lysine degradation [PATH:ko00310] Metabolism; Metabolism of Cofactors and Vitamins; Biotin metabolism [PATH:ko00780]	COG0596 Predicted hydrolases or acyltransferases (alpha/beta hydrolase superfamily) R General function prediction only ;	Y2248_MYCBO Putative hydrolase Mb2248c OS=Mycobacterium bovis GN=Mb2248c PE=3 SV=1	D8QKE5_SCHCO Putative uncharacterized protein OS=Schizophyllum commune H4-8 GN=SCHCODRAFT_238491 PE=4 SV=1	hypothetical protein SCHCODRAFT_238491 [Schizophyllum commune H4-8]	IPR000073; Alpha/beta hydrolase fold-1	NA
G_lucidum_10003099	NA	NA	NA	NA	Q9P3F8_NEUCR Predicted protein OS=Neurospora crassa GN=B2A19.080 PE=4 SV=1	hypothetical protein NCU03535 [Neurospora crassa OR74A]	NA	NA
G_lucidum_10003100	NA	NA	NA	NA	B7GB28_PHATR Predicted protein OS=Phaeodactylum tricornutum CCAP 1055/1 GN=PHATRDRAFT_49571 PE=4 SV=1	hypothetical protein BuboB_31703 [Burkholderia ubonensis Bu]	NA	NA
G_lucidum_10003101	NA	NA	NA	NA	NA	NA	NA	NA
G_lucidum_10003102	NA	NA	NA	NA	B8PH90_POSPM Predicted protein OS=Postia placenta (strain ATCC 44394 / Madison 698-R) GN=POSPLDRAFT_103940 PE=4 SV=1	predicted protein [Postia placenta Mad-698-R]	NA	NA
G_lucidum_10003103	PF01370.15;	K00083 E1.1.1.195 cinnamyl-alcohol dehydrogenase 1.1.1.195 Metabolism; Biosynthesis of Other Secondary Metabolites; Phenylpropanoid biosynthesis [PATH:ko00940]	COG0451 Nucleoside-diphosphate-sugar epimerases MG Cell wall/membrane/envelope biogenesis ; Carbohydrate transport and metabolism ;	YKJ7_SCHPO Putative uncharacterized oxidoreductase C513.07 OS=Schizosaccharomyces pombe GN=SPAC513.07 PE=2 SV=1	B0DGL3_LACBS Predicted protein OS=Laccaria bicolor (strain S238N-H82) GN=LACBIDRAFT_300371 PE=4 SV=1	predicted protein [Laccaria bicolor S238N-H82]	IPR001509; NAD-dependent epimerase/dehydratase IPR016040; NAD(P)-binding domain	GO:0003824; catalytic activity; Molecular Function GO:0005488; binding; Molecular Function GO:0008152; metabolic process; Biological Process GO:0044237; cellular metabolic process; Biological Process GO:0050662; coenzyme binding; Molecular Function
G_lucidum_10003104	NA	NA	NA	NA	B7GB28_PHATR Predicted protein OS=Phaeodactylum tricornutum CCAP 1055/1 GN=PHATRDRAFT_49571 PE=4 SV=1	predicted protein [Phaeodactylum tricornutum CCAP 1055/1]	NA	NA
G_lucidum_10003105	NA	NA	NA	NA	NA	NA	NA	NA
G_lucidum_10003106	NA	NA	NA	NA	NA	NA	NA	NA
G_lucidum_10003107	NA	NA	NA	NA	NA	NA	NA	NA
G_lucidum_10003108	NA	NA	NA	NA	B8P6L3_POSPM Predicted protein OS=Postia placenta (strain ATCC 44394 / Madison 698-R) GN=POSPLDRAFT_99035 PE=4 SV=1	predicted protein [Postia placenta Mad-698-R]	IPR001810; F-box domain, cyclin-like IPR022364; F-box domain, Skp2-like	GO:0005515; protein binding; Molecular Function
G_lucidum_10003109	NA	NA	NA	NA	NA	NA	NA	NA
G_lucidum_10003110	PF02320.10;	K00416 QCR6, UQCRH ubiquinol-cytochrome c reductase subunit 6 1.10.2.2 Metabolism; Energy Metabolism; Oxidative phosphorylation [PATH:ko00190] Organismal Systems; Circulatory System; Cardiac muscle contraction [PATH:ko04260] Human Diseases; Neurodegenerative Diseases; Alzheimer's disease [PATH:ko05010] Human Diseases; Neurodegenerative Diseases; Parkinson's disease [PATH:ko05012] Human Diseases; …	NA	NA	B0DXR3_LACBS Predicted protein OS=Laccaria bicolor (strain S238N-H82) GN=LACBIDRAFT_313187 PE=4 SV=1	predicted protein [Laccaria bicolor S238N-H82]	IPR023184; Ubiquinol-cytochrome C reductase hinge domain	NA
G_lucidum_10003111	NA	NA	NA	NA	NA	NA	NA	NA
G_lucidum_10003112	NA	NA	NA	NA	NA	NA	NA	NA
G_lucidum_10003113	NA	NA	NA	NA	B0DFQ5_LACBS Predicted protein OS=Laccaria bicolor (strain S238N-H82) GN=LACBIDRAFT_299952 PE=4 SV=1	predicted protein [Laccaria bicolor S238N-H82]	NA	NA
G_lucidum_10003114	PF01625.1;	K07304 msrA peptide-methionine (S)-S-oxide reductase 1.8.4.11 Unclassified; Genetic Information Processing; Protein folding and associated processing	COG0225 Peptide methionine sulfoxide reductase O Posttranslational modification, protein turnover, chaperones ;	MSRA_SCHPO Probable peptide methionine sulfoxide reductase OS=Schizosaccharomyces pombe GN=SPAC29E6.05c PE=2 SV=2	A8NHX0_COPC7 Peptide methionine sulfoxide reductase OS=Coprinopsis cinerea (strain Okayama-7 / 130 / FGSC 9003) GN=CC1G_01524 PE=3 SV=1	peptide methionine sulfoxide reductase [Coprinopsis cinerea okayama7#130]	IPR002569; Peptide methionine sulphoxide reductase MsrA	GO:0016671; oxidoreductase activity, acting on a sulfur group of donors, disulfide as acceptor; Molecular Function GO:0019538; protein metabolic process; Biological Process GO:0055114; oxidation-reduction process; Biological Process
G_lucidum_10003115	NA	NA	NA	NA	D8PXE0_SCHCO Putative uncharacterized protein (Fragment) OS=Schizophyllum commune H4-8 GN=SCHCODRAFT_107144 PE=4 SV=1	hypothetical protein SCHCODRAFT_107144 [Schizophyllum commune H4-8]	NA	NA
G_lucidum_10003116	PF01399.21;	K12177 COPS3, CSN3 COP9 signalosome complex subunit 3 -- Genetic Information Processing; Folding, Sorting and Degradation; Ubiquitin system [BR:ko04121]	NA	CSN3_DICDI COP9 signalosome complex subunit 3 OS=Dictyostelium discoideum GN=csn3 PE=1 SV=1	B8PEP3_POSPM Predicted protein OS=Postia placenta (strain ATCC 44394 / Madison 698-R) GN=POSPLDRAFT_106417 PE=4 SV=1	predicted protein [Postia placenta Mad-698-R]	IPR000717; Proteasome component (PCI) domain IPR011991; Winged helix-turn-helix transcription repressor DNA-binding	GO:0005515; protein binding; Molecular Function
G_lucidum_10003117	PF00067.16;	K00517 E1.14.-.- -- -- Metabolism; Metabolism of Terpenoids and Polyketides; Limonene and pinene degradation [PATH:ko00903] Metabolism; Biosynthesis of Other Secondary Metabolites; Stilbenoid, diarylheptanoid and gingerol biosynthesis [PATH:ko00945] Metabolism; Xenobiotics Biodegradation and Metabolism; gamma-Hexachlorocyclohexane degradation [PATH:ko00361] Metabolism; Xenobiotics Biodegradation …	COG2124 Cytochrome P450 Q Secondary metabolites biosynthesis, transport and catabolism ;	ORDA_ASPFN O-methylsterigmatocystin oxidoreductase OS=Aspergillus flavus (strain ATCC 200026 / FGSC A1120 / NRRL 3357 / JCM 12722 / SRRC 167) GN=ordA PE=2 SV=1	B0DFK4_LACBS Predicted protein OS=Laccaria bicolor (strain S238N-H82) GN=LACBIDRAFT_251026 PE=3 SV=1	predicted protein [Laccaria bicolor S238N-H82]	IPR001128; Cytochrome P450 IPR002401; Cytochrome P450, E-class, group I IPR017972; Cytochrome P450, conserved site	GO:0004497; monooxygenase activity; Molecular Function GO:0005506; iron ion binding; Molecular Function GO:0009055; electron carrier activity; Molecular Function GO:0020037; heme binding; Molecular Function GO:0055114; oxidation-reduction process; Biological Process
G_lucidum_10003118	PF00773.13;	K12585 DIS3, RRP44 exosome complex exonuclease DIS3/RRP44 3.1.13.- Genetic Information Processing; Folding, Sorting and Degradation; RNA degradation [PATH:ko03018]	COG0557 Exoribonuclease R K Transcription ;	DIS3_SCHPO Exosome complex exonuclease dis3 OS=Schizosaccharomyces pombe GN=dis3 PE=1 SV=1	B0D4A4_LACBS Predicted protein OS=Laccaria bicolor (strain S238N-H82) GN=LACBIDRAFT_248250 PE=4 SV=1	predicted protein [Laccaria bicolor S238N-H82]	IPR001900; Ribonuclease II/R IPR006596; Nucleotide binding protein, PINc IPR022966; Ribonuclease II/R, conserved site	GO:0003723; RNA binding; Molecular Function GO:0004540; ribonuclease activity; Molecular Function
G_lucidum_10003119	PF07774.7;PF00328.1;	K01078 E3.1.3.2 acid phosphatase 3.1.3.2 Metabolism; Metabolism of Cofactors and Vitamins; Riboflavin metabolism [PATH:ko00740] Metabolism; Xenobiotics Biodegradation and Metabolism; gamma-Hexachlorocyclohexane degradation [PATH:ko00361]	NA	K0090_XENLA Uncharacterized protein KIAA0090 homolog OS=Xenopus laevis PE=2 SV=1	B0D6Z3_LACBS Predicted protein OS=Laccaria bicolor (strain S238N-H82) GN=LACBIDRAFT_318747 PE=4 SV=1	predicted protein [Laccaria bicolor S238N-H82]	IPR000560; Histidine phosphatase superfamily, clade-2 IPR011047; Quinonprotein alcohol dehydrogenase-like IPR011678; Domain of unknown function DUF1620	GO:0003993; acid phosphatase activity; Molecular Function
G_lucidum_10003120	PF05699.8;	NA	NA	TRA1_MAIZE Putative AC transposase OS=Zea mays PE=2 SV=2	A8N0A8_COPC7 Putative uncharacterized protein OS=Coprinopsis cinerea (strain Okayama-7 / 130 / FGSC 9003) GN=CC1G_02877 PE=4 SV=2	hypothetical protein CC1G_02877 [Coprinopsis cinerea okayama7#130]	IPR008906; HAT dimerisation IPR012337; Ribonuclease H-like	GO:0003676; nucleic acid binding; Molecular Function GO:0046983; protein dimerization activity; Molecular Function
G_lucidum_10003121	PF06087.6;	K10862 TDP1 tyrosyl-DNA phosphodiesterase 1 3.1.4.- Genetic Information Processing; Replication and Repair; DNA repair and recombination proteins [BR:ko03400]	NA	TYDP1_HUMAN Tyrosyl-DNA phosphodiesterase 1 OS=Homo sapiens GN=TDP1 PE=1 SV=2	A8NI36_COPC7 Putative uncharacterized protein OS=Coprinopsis cinerea (strain Okayama-7 / 130 / FGSC 9003) GN=CC1G_01574 PE=4 SV=2	hypothetical protein CC1G_01574 [Coprinopsis cinerea okayama7#130]	IPR003903; Ubiquitin interacting motif IPR010347; Tyrosyl-DNA phosphodiesterase	GO:0005634; nucleus; Cellular Component GO:0006281; DNA repair; Biological Process GO:0008081; phosphoric diester hydrolase activity; Molecular Function
G_lucidum_10003122	PF07993.6;	K00143 E1.2.1.31L aminoadipate-semialdehyde dehydrogenase large subunit 1.2.1.31 Metabolism; Amino Acid Metabolism; Lysine biosynthesis [PATH:ko00300] Metabolism; Amino Acid Metabolism; Lysine degradation [PATH:ko00310]	COG3320 Putative dehydrogenase domain of multifunctional non-ribosomal peptide synthetases and related enzymes Q Secondary metabolites biosynthesis, transport and catabolism ;	LYS2_ASHGO L-aminoadipate-semialdehyde dehydrogenase large subunit OS=Ashbya gossypii GN=LYS2 PE=3 SV=1	B0DWP1_LACBS Predicted protein OS=Laccaria bicolor (strain S238N-H82) GN=LACBIDRAFT_312779 PE=4 SV=1	predicted protein [Laccaria bicolor S238N-H82]	IPR013120; Male sterility, NAD-binding IPR016040; NAD(P)-binding domain	GO:0003824; catalytic activity; Molecular Function GO:0005488; binding; Molecular Function GO:0008152; metabolic process; Biological Process
G_lucidum_10003123	PF07993.6;PF00501.22;PF00550.19;	K00143 E1.2.1.31L aminoadipate-semialdehyde dehydrogenase large subunit 1.2.1.31 Metabolism; Amino Acid Metabolism; Lysine biosynthesis [PATH:ko00300] Metabolism; Amino Acid Metabolism; Lysine degradation [PATH:ko00310]	COG3320 Putative dehydrogenase domain of multifunctional non-ribosomal peptide synthetases and related enzymes Q Secondary metabolites biosynthesis, transport and catabolism ;	LYS2_ASHGO L-aminoadipate-semialdehyde dehydrogenase large subunit OS=Ashbya gossypii GN=LYS2 PE=3 SV=1	B0DWP1_LACBS Predicted protein OS=Laccaria bicolor (strain S238N-H82) GN=LACBIDRAFT_312779 PE=4 SV=1	predicted protein [Laccaria bicolor S238N-H82]	IPR000873; AMP-dependent synthetase/ligase IPR006163; Phosphopantetheine-binding IPR009081; Acyl carrier protein-like IPR013120; Male sterility, NAD-binding IPR016040; NAD(P)-binding domain	GO:0000036; acyl carrier activity; Molecular Function GO:0003824; catalytic activity; Molecular Function GO:0005488; binding; Molecular Function GO:0008152; metabolic process; Biological Process GO:0048037; cofactor binding; Molecular Function
G_lucidum_10003124	PF08767.5;PF07690.10;PF08389.6;	K08192 DAL MFS transporter, ACS family, allantoate permease -- Environmental Information Processing; Membrane Transport; Transporters [BR:ko02000]	NA	YHJ1_SCHPO Uncharacterized transporter PB10D8.01 OS=Schizosaccharomyces pombe GN=SPBPB10D8.01 PE=2 SV=1	A8NI04_COPC7 Putative uncharacterized protein OS=Coprinopsis cinerea (strain Okayama-7 / 130 / FGSC 9003) GN=CC1G_01550 PE=4 SV=1	hypothetical protein CC1G_01550 [Coprinopsis cinerea okayama7#130]	IPR011701; Major facilitator superfamily MFS-1 IPR011989; Armadillo-like helical IPR013598; Exportin-1/Importin-beta-like IPR014877; Exportin 1, C-terminal IPR016024; Armadillo-type fold IPR016196; Major facilitator superfamily, general substrate transporter	GO:0005488; binding; Molecular Function GO:0055085; transmembrane transport; Biological Process
G_lucidum_10003125	NA	NA	NA	NA	NA	NA	NA	NA
G_lucidum_10003126	NA	NA	NA	NA	A8NZW8_COPC7 Protein kinase subdomain-containing protein PKL/ccin3 OS=Coprinopsis cinerea (strain Okayama-7 / 130 / FGSC 9003) GN=CC1G_06974 PE=4 SV=1	protein kinase subdomain-containing protein PKL/ccin3 [Coprinopsis cinerea okayama7#130]	NA	NA
G_lucidum_10003127	NA	NA	NA	CSGA_MYXXA C-factor OS=Myxococcus xanthus GN=csgA PE=1 SV=1	D5QK83_METTR Short-chain dehydrogenase/reductase SDR OS=Methylosinus trichosporium OB3b GN=MettrDRAFT_0209 PE=4 SV=1	short-chain dehydrogenase/reductase SDR [Methylosinus trichosporium OB3b]	IPR016040; NAD(P)-binding domain	GO:0003824; catalytic activity; Molecular Function GO:0005488; binding; Molecular Function GO:0008152; metabolic process; Biological Process
G_lucidum_10003128	NA	NA	NA	NA	NA	NA	NA	NA
G_lucidum_10003129	PF00487.18;	K10256 FAD2 omega-6 fatty acid desaturase (delta-12 desaturase) 1.14.19.- Metabolism; Lipid Metabolism; Biosynthesis of unsaturated fatty acids [PATH:ko01040] Metabolism; Lipid Metabolism; Lipid biosynthesis proteins [BR:ko01004]	COG3239 Fatty acid desaturase I Lipid transport and metabolism ;	FAD12_MORIS Delta(12) fatty acid desaturase OS=Mortierella isabellina PE=2 SV=1	D8Q6W2_SCHCO Putative uncharacterized protein (Fragment) OS=Schizophyllum commune H4-8 GN=SCHCODRAFT_56616 PE=4 SV=1	hypothetical protein SCHCODRAFT_56616 [Schizophyllum commune H4-8]	NA	NA
G_lucidum_10003130	PF07690.10;	K08187 SLC16A10 MFS transporter, MCP family, solute carrier family 16 (monocarboxylic acid transporters), member 10 -- Environmental Information Processing; Membrane Transport; Transporters [BR:ko02000]	NA	MCH5_YEAST Riboflavin transporter MCH5 OS=Saccharomyces cerevisiae GN=MCH5 PE=1 SV=1	D8PUB8_SCHCO Putative uncharacterized protein OS=Schizophyllum commune H4-8 GN=SCHCODRAFT_255825 PE=4 SV=1	hypothetical protein SCHCODRAFT_255825 [Schizophyllum commune H4-8]	IPR011701; Major facilitator superfamily MFS-1 IPR016196; Major facilitator superfamily, general substrate transporter	GO:0055085; transmembrane transport; Biological Process
G_lucidum_10003131	PF07993.6;PF00501.22;PF04140.8;	K00143 E1.2.1.31L aminoadipate-semialdehyde dehydrogenase large subunit 1.2.1.31 Metabolism; Amino Acid Metabolism; Lysine biosynthesis [PATH:ko00300] Metabolism; Amino Acid Metabolism; Lysine degradation [PATH:ko00310]	COG3320 Putative dehydrogenase domain of multifunctional non-ribosomal peptide synthetases and related enzymes Q Secondary metabolites biosynthesis, transport and catabolism ;	LYS2_CANGA L-aminoadipate-semialdehyde dehydrogenase large subunit OS=Candida glabrata GN=LYS2 PE=3 SV=1	B0DWP1_LACBS Predicted protein OS=Laccaria bicolor (strain S238N-H82) GN=LACBIDRAFT_312779 PE=4 SV=1	predicted protein [Laccaria bicolor S238N-H82]	IPR000873; AMP-dependent synthetase/ligase IPR007269; Isoprenylcysteine carboxyl methyltransferase IPR009081; Acyl carrier protein-like IPR013120; Male sterility, NAD-binding IPR016040; NAD(P)-binding domain	GO:0000036; acyl carrier activity; Molecular Function GO:0003824; catalytic activity; Molecular Function GO:0004671; protein C-terminal S-isoprenylcysteine carboxyl O-methyltransferase activity; Molecular Function GO:0005488; binding; Molecular Function GO:0006481; C-terminal protein methylation; Biological Process GO:0008152; metabolic process; Biological Process GO:0016021; integral to membrane…
G_lucidum_10003132	PF00067.16;	K00517 E1.14.-.- -- -- Metabolism; Metabolism of Terpenoids and Polyketides; Limonene and pinene degradation [PATH:ko00903] Metabolism; Biosynthesis of Other Secondary Metabolites; Stilbenoid, diarylheptanoid and gingerol biosynthesis [PATH:ko00945] Metabolism; Xenobiotics Biodegradation and Metabolism; gamma-Hexachlorocyclohexane degradation [PATH:ko00361] Metabolism; Xenobiotics Biodegradation …	COG2124 Cytochrome P450 Q Secondary metabolites biosynthesis, transport and catabolism ;	CP67_UROFA Cytochrome P450 67 (Fragment) OS=Uromyces fabae GN=CYP67 PE=2 SV=1	B8P9K4_POSPM Predicted protein OS=Postia placenta (strain ATCC 44394 / Madison 698-R) GN=POSPLDRAFT_99726 PE=4 SV=1	predicted protein [Postia placenta Mad-698-R]	IPR001128; Cytochrome P450 IPR002403; Cytochrome P450, E-class, group IV IPR017972; Cytochrome P450, conserved site	GO:0004497; monooxygenase activity; Molecular Function GO:0005506; iron ion binding; Molecular Function GO:0009055; electron carrier activity; Molecular Function GO:0020037; heme binding; Molecular Function
G_lucidum_10003133	NA	NA	NA	NA	D8PKC8_SCHCO Putative uncharacterized protein (Fragment) OS=Schizophyllum commune H4-8 GN=SCHCODRAFT_103113 PE=4 SV=1	hypothetical protein SCHCODRAFT_103113 [Schizophyllum commune H4-8]	NA	NA
G_lucidum_10003134	PF00487.18;	K10256 FAD2 omega-6 fatty acid desaturase (delta-12 desaturase) 1.14.19.- Metabolism; Lipid Metabolism; Biosynthesis of unsaturated fatty acids [PATH:ko01040] Metabolism; Lipid Metabolism; Lipid biosynthesis proteins [BR:ko01004]	COG3239 Fatty acid desaturase I Lipid transport and metabolism ;	FAD12_MORAP Delta(12) fatty acid desaturase OS=Mortierella alpina PE=2 SV=2	D8Q6W2_SCHCO Putative uncharacterized protein (Fragment) OS=Schizophyllum commune H4-8 GN=SCHCODRAFT_56616 PE=4 SV=1	hypothetical protein SCHCODRAFT_56616 [Schizophyllum commune H4-8]	IPR005804; Fatty acid desaturase, type 1	GO:0006629; lipid metabolic process; Biological Process GO:0016491; oxidoreductase activity; Molecular Function GO:0055114; oxidation-reduction process; Biological Process
G_lucidum_10003135	PF00487.18;	K10256 FAD2 omega-6 fatty acid desaturase (delta-12 desaturase) 1.14.19.- Metabolism; Lipid Metabolism; Biosynthesis of unsaturated fatty acids [PATH:ko01040] Metabolism; Lipid Metabolism; Lipid biosynthesis proteins [BR:ko01004]	COG3239 Fatty acid desaturase I Lipid transport and metabolism ;	FAD12_MORAP Delta(12) fatty acid desaturase OS=Mortierella alpina PE=2 SV=2	D8Q6W2_SCHCO Putative uncharacterized protein (Fragment) OS=Schizophyllum commune H4-8 GN=SCHCODRAFT_56616 PE=4 SV=1	hypothetical protein SCHCODRAFT_56616 [Schizophyllum commune H4-8]	IPR005804; Fatty acid desaturase, type 1	GO:0006629; lipid metabolic process; Biological Process GO:0016491; oxidoreductase activity; Molecular Function GO:0055114; oxidation-reduction process; Biological Process
G_lucidum_10003136	NA	NA	NA	NA	NA	NA	NA	NA
G_lucidum_10003137	NA	NA	NA	NA	NA	NA	NA	NA
G_lucidum_10003138	NA	NA	NA	NA	NA	NA	NA	NA
G_lucidum_10003139	PF01370.15;	K00091 E1.1.1.219 dihydroflavonol-4-reductase 1.1.1.219 Metabolism; Biosynthesis of Other Secondary Metabolites; Flavonoid biosynthesis [PATH:ko00941]	COG0451 Nucleoside-diphosphate-sugar epimerases MG Cell wall/membrane/envelope biogenesis ; Carbohydrate transport and metabolism ;	YKJ7_SCHPO Putative uncharacterized oxidoreductase C513.07 OS=Schizosaccharomyces pombe GN=SPAC513.07 PE=2 SV=1	B0DGL3_LACBS Predicted protein OS=Laccaria bicolor (strain S238N-H82) GN=LACBIDRAFT_300371 PE=4 SV=1	predicted protein [Laccaria bicolor S238N-H82]	IPR001509; NAD-dependent epimerase/dehydratase IPR016040; NAD(P)-binding domain	GO:0003824; catalytic activity; Molecular Function GO:0005488; binding; Molecular Function GO:0008152; metabolic process; Biological Process GO:0044237; cellular metabolic process; Biological Process GO:0050662; coenzyme binding; Molecular Function
G_lucidum_10003140	NA	NA	NA	NA	NA	NA	NA	NA
G_lucidum_10004523	NA	K01567 E3.-.-.- -- -- Unclassified; Metabolism; Others	NA	NA	B8PF66_POSPM Predicted protein OS=Postia placenta (strain ATCC 44394 / Madison 698-R) GN=POSPLDRAFT_97634 PE=4 SV=1	predicted protein [Postia placenta Mad-698-R]	IPR011008; Dimeric alpha-beta barrel	NA
G_lucidum_10004524	NA	NA	NA	NA	NA	NA	NA	NA
G_lucidum_10004525	NA	NA	NA	NA	NA	NA	NA	NA
G_lucidum_10004526	NA	NA	NA	NA	NA	NA	NA	NA
G_lucidum_10004527	NA	NA	NA	NA	NA	NA	NA	NA
G_lucidum_10004528	NA	NA	NA	NA	NA	NA	NA	NA
G_lucidum_10004529	PF02777.12;PF00081.16;	K04564 E1.15.1.1A, sodA, sodB, SOD2 superoxide dismutase, Fe-Mn family 1.15.1.1 Cellular Processes; Transport and Catabolism; Peroxisome [PATH:ko04146] Human Diseases; Neurodegenerative Diseases; Huntington's disease [PATH:ko05016]	COG0605 Superoxide dismutase P Inorganic ion transport and metabolism ;	SODM_GANMI Superoxide dismutase [Mn], mitochondrial OS=Ganoderma microsporum PE=2 SV=1	Q96W28_PHACH Superoxide dismutase OS=Phanerochaete chrysosporium GN=MNSOD1 PE=3 SV=1	RecName: Full=Superoxide dismutase [Mn], mitochondrial; AltName: Full=Mn-SOD; Flags: Precursor	IPR001189; Manganese/iron superoxide dismutase IPR019831; Manganese/iron superoxide dismutase, N-terminal IPR019832; Manganese/iron superoxide dismutase, C-terminal IPR019833; Manganese/iron superoxide dismutase, binding site	GO:0004784; superoxide dismutase activity; Molecular Function GO:0006801; superoxide metabolic process; Biological Process GO:0046872; metal ion binding; Molecular Function GO:0055114; oxidation-reduction process; Biological Process
G_lucidum_10004530	NA	NA	NA	NA	NA	NA	NA	NA
G_lucidum_10004531	PF00135.22;	K03927 PNBA carboxylesterase type B 3.1.1.1 Metabolism; Xenobiotics Biodegradation and Metabolism; Drug metabolism - other enzymes [PATH:ko00983]	COG2272 Carboxylesterase type B I Lipid transport and metabolism ;	LIP1_CANRU Lipase 1 OS=Candida rugosa GN=LIP1 PE=1 SV=3	B0CV23_LACBS Carotenoid ester lipase OS=Laccaria bicolor (strain S238N-H82) GN=LACBIDRAFT_182815 PE=3 SV=1	carotenoid ester lipase precursor [Laccaria bicolor S238N-H82]	IPR002018; Carboxylesterase, type B	NA
G_lucidum_10004532	NA	NA	NA	NA	NA	NA	NA	NA
G_lucidum_10004533	PF03302.7;	NA	NA	NA	B0DVP7_LACBS Predicted protein OS=Laccaria bicolor (strain S238N-H82) GN=LACBIDRAFT_333369 PE=4 SV=1	predicted protein [Laccaria bicolor S238N-H82]	NA	NA
G_lucidum_10004534	NA	NA	NA	NA	NA	NA	NA	NA
G_lucidum_10004535	NA	NA	NA	NA	NA	NA	NA	NA
G_lucidum_10004536	NA	NA	NA	NA	D6RN46_COPC7 Putative uncharacterized protein OS=Coprinopsis cinerea (strain Okayama-7 / 130 / FGSC 9003) GN=CC1G_15502 PE=4 SV=1	hypothetical protein CC1G_15502 [Coprinopsis cinerea okayama7#130]	NA	NA
G_lucidum_10004537	NA	NA	NA	NA	NA	NA	NA	NA
G_lucidum_10004538	NA	NA	NA	NA	NA	NA	NA	NA
G_lucidum_10004539	NA	NA	NA	NA	NA	NA	NA	NA
G_lucidum_10004540	NA	K01567 E3.-.-.- -- -- Unclassified; Metabolism; Others	NA	NA	B8PF66_POSPM Predicted protein OS=Postia placenta (strain ATCC 44394 / Madison 698-R) GN=POSPLDRAFT_97634 PE=4 SV=1	predicted protein [Postia placenta Mad-698-R]	IPR011008; Dimeric alpha-beta barrel	NA
G_lucidum_10004541	NA	NA	NA	NA	NA	NA	NA	NA
G_lucidum_10004542	NA	K01567 E3.-.-.- -- -- Unclassified; Metabolism; Others	NA	NA	B8PHL9_POSPM Predicted protein OS=Postia placenta (strain ATCC 44394 / Madison 698-R) GN=POSPLDRAFT_93765 PE=4 SV=1	predicted protein [Postia placenta Mad-698-R]	IPR011008; Dimeric alpha-beta barrel	NA
G_lucidum_10004543	NA	NA	NA	NA	NA	NA	NA	NA
G_lucidum_10004544	NA	NA	NA	NA	NA	NA	NA	NA
G_lucidum_10004545	NA	NA	NA	NA	NA	NA	NA	NA
G_lucidum_10004546	NA	NA	NA	NA	NA	NA	NA	NA
G_lucidum_10004547	NA	NA	NA	NA	NA	NA	NA	NA
G_lucidum_10004548	NA	NA	NA	NA	NA	NA	NA	NA
G_lucidum_10004549	NA	NA	NA	NA	NA	NA	NA	NA
G_lucidum_10004550	NA	NA	NA	NA	NA	NA	NA	NA
G_lucidum_10004551	NA	NA	NA	NA	NA	NA	NA	NA
G_lucidum_10004552	NA	NA	NA	NA	Q4W2V7_PLARE Merzoite surface protein 1 OS=Plasmodium reichenowi GN=msp1 PE=4 SV=1	NA	NA	NA
G_lucidum_10004553	NA	NA	NA	NA	NA	NA	NA	NA
G_lucidum_10004554	NA	NA	NA	NA	B8PH58_POSPM Predicted protein OS=Postia placenta (strain ATCC 44394 / Madison 698-R) GN=POSPLDRAFT_103354 PE=4 SV=1	predicted protein [Postia placenta Mad-698-R]	NA	NA
G_lucidum_10004555	NA	NA	NA	NA	B0D210_LACBS Predicted protein OS=Laccaria bicolor (strain S238N-H82) GN=LACBIDRAFT_324502 PE=4 SV=1	predicted protein [Laccaria bicolor S238N-H82]	NA	NA
G_lucidum_10004556	NA	NA	NA	NA	NA	NA	NA	NA
G_lucidum_10004557	PF02902.13;	K08592 SENP1 sentrin-specific protease 1 3.4.22.- Metabolism; Enzyme Families; Peptidases [BR:ko01002] Genetic Information Processing; Folding, Sorting and Degradation; Ubiquitin system [BR:ko04121]	COG5160 Protease, Ulp1 family O Posttranslational modification, protein turnover, chaperones ;	SENP1_PONAB Sentrin-specific protease 1 OS=Pongo abelii GN=SENP1 PE=2 SV=1	B8P112_POSPM Predicted protein (Fragment) OS=Postia placenta (strain ATCC 44394 / Madison 698-R) GN=POSPLDRAFT_19052 PE=4 SV=1	predicted protein [Postia placenta Mad-698-R]	IPR003653; Peptidase C48, SUMO/Sentrin/Ubl1	GO:0006508; proteolysis; Biological Process GO:0008234; cysteine-type peptidase activity; Molecular Function
G_lucidum_10004558	NA	NA	NA	NA	NA	NA	NA	NA
G_lucidum_10004559	NA	NA	NA	NA	NA	NA	NA	NA
G_lucidum_10004560	NA	NA	NA	NA	NA	NA	NA	NA
G_lucidum_10004561	NA	NA	NA	NA	NA	NA	NA	NA
G_lucidum_10004562	PF07690.10;	K13336 PEX3 peroxin-3 -- Cellular Processes; Transport and Catabolism; Peroxisome [PATH:ko04146]	NA	TNA1_YEAST High-affinity nicotinic acid transporter OS=Saccharomyces cerevisiae GN=TNA1 PE=1 SV=1	B8PFT8_POSPM Predicted protein OS=Postia placenta (strain ATCC 44394 / Madison 698-R) GN=POSPLDRAFT_88920 PE=4 SV=1	predicted protein [Postia placenta Mad-698-R]	IPR011701; Major facilitator superfamily MFS-1 IPR016196; Major facilitator superfamily, general substrate transporter IPR020846; Major facilitator superfamily	GO:0055085; transmembrane transport; Biological Process
G_lucidum_10004563	PF07690.10;	K13336 PEX3 peroxin-3 -- Cellular Processes; Transport and Catabolism; Peroxisome [PATH:ko04146]	NA	TNA1_YEAST High-affinity nicotinic acid transporter OS=Saccharomyces cerevisiae GN=TNA1 PE=1 SV=1	B8PFT8_POSPM Predicted protein OS=Postia placenta (strain ATCC 44394 / Madison 698-R) GN=POSPLDRAFT_88920 PE=4 SV=1	predicted protein [Postia placenta Mad-698-R]	IPR011701; Major facilitator superfamily MFS-1 IPR016196; Major facilitator superfamily, general substrate transporter IPR020846; Major facilitator superfamily	GO:0055085; transmembrane transport; Biological Process
G_lucidum_10004564	PF00083.18;	K06609 iolT MFS transporter, SP family, major inositol transporter -- Environmental Information Processing; Membrane Transport; Transporters [BR:ko02000]	NA	YWTG_BACSU Putative metabolite transport protein ywtG OS=Bacillus subtilis GN=ywtG PE=3 SV=1	Q6C1A0_YARLI YALI0F18084p OS=Yarrowia lipolytica GN=YALI0F18084g PE=3 SV=1	YALI0F18084p [Yarrowia lipolytica]	IPR003663; Sugar/inositol transporter IPR005828; General substrate transporter IPR016196; Major facilitator superfamily, general substrate transporter IPR020846; Major facilitator superfamily	GO:0005215; transporter activity; Molecular Function GO:0006810; transport; Biological Process GO:0016020; membrane; Cellular Component GO:0016021; integral to membrane; Cellular Component GO:0022891; substrate-specific transmembrane transporter activity; Molecular Function GO:0055085; transmembrane transport; Biological Process
G_lucidum_10004565	NA	NA	NA	NA	A8NHX4_COPC7 Putative uncharacterized protein OS=Coprinopsis cinerea (strain Okayama-7 / 130 / FGSC 9003) GN=CC1G_01527 PE=4 SV=1	hypothetical protein CC1G_01527 [Coprinopsis cinerea okayama7#130]	NA	NA
G_lucidum_10004566	NA	NA	NA	NA	NA	NA	NA	NA
G_lucidum_10004567	NA	NA	NA	NA	NA	NA	NA	NA
G_lucidum_10004568	NA	NA	NA	NA	NA	NA	NA	NA
G_lucidum_10004569	NA	NA	NA	NA	NA	NA	NA	NA
G_lucidum_10004570	PF00657.1;	NA	NA	NA	D8PN77_SCHCO Putative uncharacterized protein (Fragment) OS=Schizophyllum commune H4-8 GN=SCHCODRAFT_103662 PE=4 SV=1	hypothetical protein SCHCODRAFT_103662 [Schizophyllum commune H4-8]	IPR001087; Lipase, GDSL IPR013831; Esterase, SGNH hydrolase-type, subgroup	GO:0006629; lipid metabolic process; Biological Process GO:0016787; hydrolase activity; Molecular Function GO:0016788; hydrolase activity, acting on ester bonds; Molecular Function
G_lucidum_10004571	PF00026.17;	K01381 E3.4.23.25 saccharopepsin 3.4.23.25 Metabolism; Enzyme Families; Peptidases [BR:ko01002]	NA	CARP_IRPLA Polyporopepsin OS=Irpex lacteus PE=1 SV=1	D8Q6D5_SCHCO Putative uncharacterized protein OS=Schizophyllum commune H4-8 GN=SCHCODRAFT_56138 PE=3 SV=1	Chain A, Crystal Structure Of Aspartic Proteinase From Irpex Lacteus	IPR001461; Peptidase A1 IPR009007; Peptidase aspartic, catalytic IPR021109; Peptidase aspartic	GO:0004190; aspartic-type endopeptidase activity; Molecular Function GO:0006508; proteolysis; Biological Process
G_lucidum_10004572	NA	NA	NA	NA	NA	NA	NA	NA
G_lucidum_10004573	NA	NA	NA	NA	NA	NA	NA	NA
G_lucidum_10004574	NA	NA	NA	NA	NA	NA	NA	NA
G_lucidum_10004575	NA	NA	NA	NA	NA	NA	NA	NA
G_lucidum_10004576	NA	NA	NA	NA	NA	NA	NA	NA
G_lucidum_10004577	NA	NA	NA	NA	Q0CKP8_ASPTN Predicted protein OS=Aspergillus terreus (strain NIH 2624 / FGSC A1156) GN=ATEG_05736 PE=4 SV=1	predicted protein [Aspergillus terreus NIH2624]	NA	NA
G_lucidum_10004578	NA	NA	NA	NA	NA	NA	NA	NA
G_lucidum_10004579	NA	NA	NA	NA	NA	NA	NA	NA
G_lucidum_10004580	NA	NA	NA	NA	A8NLI4_COPC7 Putative uncharacterized protein OS=Coprinopsis cinerea (strain Okayama-7 / 130 / FGSC 9003) GN=CC1G_05831 PE=4 SV=1	hypothetical protein CC1G_05831 [Coprinopsis cinerea okayama7#130]	NA	NA
G_lucidum_10004581	PF06985.5;	NA	NA	HETE1_PODAN Vegetative incompatibility protein HET-E-1 OS=Podospora anserina GN=HET-E1 PE=4 SV=1	B8N300_ASPFN Ankyrin repeat-containing protein, putative OS=Aspergillus flavus (strain ATCC 200026 / FGSC A1120 / NRRL 3357 / JCM 12722 / SRRC 167) GN=AFLA_025240 PE=4 SV=1	ankyrin repeat-containing protein, putative [Aspergillus flavus NRRL3357]	IPR010730; Heterokaryon incompatibility	NA
G_lucidum_10000424	NA	NA	NA	NA	Q45W62_PHACH Gag (Fragment) OS=Phanerochaete chrysosporium RP-78 GN=gag PE=4 SV=1	Gag [Phanerochaete chrysosporium RP-78]	NA	NA
G_lucidum_10000425	PF00078.21;PF08284.5;	K07497 K07497 putative transposase -- Unclassified; Genetic Information Processing; Replication, recombination and repair proteins	NA	POL3_DROME Retrovirus-related Pol polyprotein from transposon 17.6 OS=Drosophila melanogaster GN=pol PE=4 SV=1	Q45W61_PHACH Polyprotein (Fragment) OS=Phanerochaete chrysosporium RP-78 GN=pol PE=4 SV=1	polyprotein [Phanerochaete chrysosporium RP-78]	IPR000477; Reverse transcriptase IPR001878; Zinc finger, CCHC-type IPR013084; Zinc finger, CCHC retroviral-type IPR013242; Retroviral aspartyl protease IPR021109; Peptidase aspartic	GO:0003676; nucleic acid binding; Molecular Function GO:0003723; RNA binding; Molecular Function GO:0003964; RNA-directed DNA polymerase activity; Molecular Function GO:0006278; RNA-dependent DNA replication; Biological Process GO:0008270; zinc ion binding; Molecular Function
G_lucidum_10000520	PF00385.18;PF00078.21;PF00665.20;PF03732.11;	K07497 K07497 putative transposase -- Unclassified; Genetic Information Processing; Replication, recombination and repair proteins	NA	RTF21_SCHPO Retrotransposable element Tf2 155 kDa protein type 1 OS=Schizosaccharomyces pombe GN=Tf2-1 PE=2 SV=1	Q5KF44_CRYNE Retrotransposon nucleocapsid protein, putative OS=Cryptococcus neoformans GN=CNF03140 PE=4 SV=1	retrotransposon nucleocapsid protein [Cryptococcus neoformans var. neoformans JEC21]	IPR000477; Reverse transcriptase IPR000953; Chromo domain IPR001584; Integrase, catalytic core IPR005162; Retrotransposon gag protein IPR012337; Ribonuclease H-like IPR016197; Chromo domain-like	GO:0000785; chromatin; Cellular Component GO:0003676; nucleic acid binding; Molecular Function GO:0003677; DNA binding; Molecular Function GO:0003682; chromatin binding; Molecular Function GO:0003723; RNA binding; Molecular Function GO:0003964; RNA-directed DNA polymerase activity; Molecular Function GO:0005634; nucleus; Cellular Component GO:0006278; RNA-dependent DNA replication; Biological Pro…
G_lucidum_10000521	NA	NA	NA	NA	B8PBC4_POSPM Predicted protein (Fragment) OS=Postia placenta (strain ATCC 44394 / Madison 698-R) GN=POSPLDRAFT_99897 PE=4 SV=1	predicted protein [Postia placenta Mad-698-R]	NA	NA
G_lucidum_10000522	NA	NA	NA	NA	NA	NA	NA	NA
G_lucidum_10007839	NA	NA	NA	NA	NA	NA	NA	NA
G_lucidum_10007840	NA	K00968 E2.7.7.15, PCYT1 choline-phosphate cytidylyltransferase 2.7.7.15 Metabolism; Lipid Metabolism; Glycerophospholipid metabolism [PATH:ko00564] Metabolism; Metabolism of Other Amino Acids; Phosphonate and phosphinate metabolism [PATH:ko00440]	COG0615 Cytidylyltransferase MI Cell wall/membrane/envelope biogenesis ; Lipid transport and metabolism ;	PCY1_YEAST Choline-phosphate cytidylyltransferase OS=Saccharomyces cerevisiae GN=PCT1 PE=1 SV=2	B0D7I5_LACBS Cholinephosphate cytidylyltransferase OS=Laccaria bicolor (strain S238N-H82) GN=LACBIDRAFT_318954 PE=4 SV=1	cholinephosphate cytidylyltransferase [Laccaria bicolor S238N-H82]	IPR014729; Rossmann-like alpha/beta/alpha sandwich fold	NA
G_lucidum_10007841	PF07524.7;	NA	NA	NA	A8NJF8_COPC7 Putative uncharacterized protein OS=Coprinopsis cinerea (strain Okayama-7 / 130 / FGSC 9003) GN=CC1G_09715 PE=4 SV=2	hypothetical protein CC1G_09715 [Coprinopsis cinerea okayama7#130]	IPR006565; Bromodomain transcription factor	NA
G_lucidum_10007842	PF00467.23;PF01287.14;	K03263 eIF-5A, EIF5A translation initiation factor eIF-5A -- Genetic Information Processing; Translation; Translation factors [BR:ko03012]	COG0231 Translation elongation factor P (EF-P)/translation initiation factor 5A (eIF-5A) J Translation, ribosomal structure and biogenesis ;	IF5A_CANAL Eukaryotic translation initiation factor 5A OS=Candida albicans GN=ANB1 PE=3 SV=1	B8PCC0_POSPM Eukaryotic translation initiation factor 5A OS=Postia placenta (strain ATCC 44394 / Madison 698-R) GN=POSPLDRAFT_108947 PE=4 SV=1	eukaryotic translation initiation factor 5A [Postia placenta Mad-698-R]	IPR001884; Translation elongation factor IF5A IPR005824; KOW IPR008991; Translation protein SH3-like IPR012340; Nucleic acid-binding, OB-fold IPR014722; Translation protein SH3-like, subgroup IPR016027; Nucleic acid-binding, OB-fold-like IPR019769; Translation elongation factor, IF5A, hypusine site IPR020189; Translation elongation factor, IF5A C-terminal	GO:0003723; RNA binding; Molecular Function GO:0003746; translation elongation factor activity; Molecular Function GO:0006452; translational frameshifting; Biological Process GO:0008612; peptidyl-lysine modification to hypusine; Biological Process GO:0043022; ribosome binding; Molecular Function GO:0045901; positive regulation of translational elongation; Biological Process GO:0045905; positive r…
G_lucidum_10007843	PF00412.16;	K09377 CSRP cysteine and glycine-rich protein -- Genetic Information Processing; Transcription; Transcription factors [BR:ko03000]	NA	CSRP3_MOUSE Cysteine and glycine-rich protein 3 OS=Mus musculus GN=Csrp3 PE=1 SV=1	B0D7J3_LACBS Cysteine and glycine-rich protein OS=Laccaria bicolor (strain S238N-H82) GN=LACBIDRAFT_318962 PE=4 SV=1	cysteine and glycine-rich protein [Laccaria bicolor S238N-H82]	IPR001781; Zinc finger, LIM-type	GO:0008270; zinc ion binding; Molecular Function
G_lucidum_10007844	PF08190.6;	NA	NA	PIHD1_XENLA PIH1 domain-containing protein 1 OS=Xenopus laevis GN=pih1d1 PE=2 SV=1	B0D7J2_LACBS Predicted protein OS=Laccaria bicolor (strain S238N-H82) GN=LACBIDRAFT_293894 PE=4 SV=1	predicted protein [Laccaria bicolor S238N-H82]	IPR012981; Nop17p	NA
G_lucidum_10007845	PF00793.14;	K01626 E2.5.1.54, aroF, aroG, aroH 3-deoxy-7-phosphoheptulonate synthase 2.5.1.54 Metabolism; Amino Acid Metabolism; Phenylalanine, tyrosine and tryptophan biosynthesis [PATH:ko00400]	COG0722 3-deoxy-D-arabino-heptulosonate 7-phosphate (DAHP) synthase E Amino acid transport and metabolism ;	AROG_SCHPO Phospho-2-dehydro-3-deoxyheptonate aldolase, tyrosine-inhibited OS=Schizosaccharomyces pombe GN=aro4 PE=2 SV=1	B8PCB8_POSPM Phospho-2-dehydro-3-deoxyheptonate aldolase OS=Postia placenta (strain ATCC 44394 / Madison 698-R) GN=POSPLDRAFT_86771 PE=3 SV=1	predicted protein [Postia placenta Mad-698-R]	IPR006218; DAHP synthetase I/KDSA IPR006219; DHAP synthase, class 1 IPR013785; Aldolase-type TIM barrel	GO:0003824; catalytic activity; Molecular Function GO:0003849; 3-deoxy-7-phosphoheptulonate synthase activity; Molecular Function GO:0008152; metabolic process; Biological Process GO:0009058; biosynthetic process; Biological Process GO:0009073; aromatic amino acid family biosynthetic process; Biological Process
G_lucidum_10007846	PF00641.12;	NA	NA	NA	B8PCB7_POSPM Predicted protein OS=Postia placenta (strain ATCC 44394 / Madison 698-R) GN=POSPLDRAFT_91677 PE=4 SV=1	predicted protein [Postia placenta Mad-698-R]	IPR001876; Zinc finger, RanBP2-type	GO:0005622; intracellular; Cellular Component GO:0008270; zinc ion binding; Molecular Function
G_lucidum_10007847	PF02845.10;	NA	NA	NA	A8NJH0_COPC7 Putative uncharacterized protein OS=Coprinopsis cinerea (strain Okayama-7 / 130 / FGSC 9003) GN=CC1G_09723 PE=4 SV=2	hypothetical protein CC1G_09723 [Coprinopsis cinerea okayama7#130]	IPR003892; Ubiquitin system component Cue	GO:0005515; protein binding; Molecular Function
G_lucidum_10007848	PF00782.14;	K04459 DUSP, MKP dual specificity phosphatase 3.1.3.16 3.1.3.48 Environmental Information Processing; Signal Transduction; MAPK signaling pathway [PATH:ko04010]	COG2453 Predicted protein-tyrosine phosphatase T Signal transduction mechanisms ;	DUS1_HUMAN Dual specificity protein phosphatase 1 OS=Homo sapiens GN=DUSP1 PE=1 SV=3	B0D7F9_LACBS Predicted protein OS=Laccaria bicolor (strain S238N-H82) GN=LACBIDRAFT_293884 PE=4 SV=1	predicted protein [Laccaria bicolor S238N-H82]	IPR000340; Dual specificity phosphatase, catalytic domain IPR000387; Dual-specific/protein-tyrosine phosphatase, conserved region IPR001763; Rhodanese-like IPR020422; Dual specificity phosphatase, subgroup, catalytic domain	GO:0006470; protein dephosphorylation; Biological Process GO:0008138; protein tyrosine/serine/threonine phosphatase activity; Molecular Function GO:0016311; dephosphorylation; Biological Process GO:0016791; phosphatase activity; Molecular Function
G_lucidum_10007849	PF01423.16;	K12626 LSM7 U6 snRNA-associated Sm-like protein LSm7 -- Genetic Information Processing; Transcription; Spliceosome [PATH:ko03040] Genetic Information Processing; Transcription; Spliceosome [BR:ko03041] Genetic Information Processing; Folding, Sorting and Degradation; RNA degradation [PATH:ko03018]	NA	LSM7_SCHPO U6 snRNA-associated Sm-like protein LSm7 OS=Schizosaccharomyces pombe GN=lsm7 PE=2 SV=1	B0D7E4_LACBS Predicted protein (Fragment) OS=Laccaria bicolor (strain S238N-H82) GN=LACBIDRAFT_234170 PE=4 SV=1	predicted protein [Laccaria bicolor S238N-H82]	IPR001163; Like-Sm ribonucleoprotein (LSM) domain IPR006649; Like-Sm ribonucleoprotein (LSM) domain, eukaryotic/archaea-type IPR010920; Like-Sm ribonucleoprotein (LSM)-related domain IPR017132; U6 snRNA-associated Sm-like protein LSm7	NA
G_lucidum_10007850	PF03810.13;	NA	COG5215 Karyopherin (importin) beta U Intracellular trafficking, secretion, and vesicular transport ;	IMB1_SCHPO Importin subunit beta-1 OS=Schizosaccharomyces pombe GN=kap95 PE=2 SV=1	B0D7E3_LACBS Predicted protein OS=Laccaria bicolor (strain S238N-H82) GN=LACBIDRAFT_190101 PE=4 SV=1	predicted protein [Laccaria bicolor S238N-H82]	IPR000225; Armadillo IPR000357; HEAT IPR001494; Importin-beta, N-terminal IPR011989; Armadillo-like helical IPR016024; Armadillo-type fold IPR021133; HEAT, type 2	GO:0005488; binding; Molecular Function GO:0005515; protein binding; Molecular Function GO:0006886; intracellular protein transport; Biological Process GO:0008565; protein transporter activity; Molecular Function
G_lucidum_10007851	PF07969.5;	K07047 K07047 -- -- Unclassified; Poorly Characterized; General function prediction only	COG1574 Predicted metal-dependent hydrolase with the TIM-barrel fold R General function prediction only ;	YTCJ_BACSU Putative amidohydrolase ytcJ OS=Bacillus subtilis GN=ytcJ PE=4 SV=1	B8PKM2_POSPM Predicted protein OS=Postia placenta (strain ATCC 44394 / Madison 698-R) GN=POSPLDRAFT_104349 PE=4 SV=1	predicted protein [Postia placenta Mad-698-R]	IPR013108; Amidohydrolase 3	NA
G_lucidum_10007852	PF00867.12;	K10846 ERCC5, XPG, RAD2 DNA excision repair protein ERCC-5 -- Genetic Information Processing; Replication and Repair; Nucleotide excision repair [PATH:ko03420] Genetic Information Processing; Replication and Repair; DNA repair and recombination proteins [BR:ko03400]	NA	GENL2_ARATH Flap endonuclease GEN-like 2 OS=Arabidopsis thaliana GN=GEN2 PE=2 SV=2	B8PDD2_POSPM Predicted protein (Fragment) OS=Postia placenta (strain ATCC 44394 / Madison 698-R) GN=POSPLDRAFT_29770 PE=4 SV=1	predicted protein [Postia placenta Mad-698-R]	IPR006084; DNA repair protein (XPGC)/yeast Rad IPR006085; XPG N-terminal IPR006086; XPG/RAD2 endonuclease IPR020045; 5'-3' exonuclease, C-terminal subdomain	GO:0003677; DNA binding; Molecular Function GO:0003824; catalytic activity; Molecular Function GO:0004518; nuclease activity; Molecular Function GO:0006281; DNA repair; Biological Process
G_lucidum_10007853	PF03542.10;PF02145.9;	K07207 TSC2 tuberous sclerosis 2 -- Environmental Information Processing; Signal Transduction; mTOR signaling pathway [PATH:ko04150] Cellular Processes; Cell Growth and Death; p53 signaling pathway [PATH:ko04115] Organismal Systems; Endocrine System; Insulin signaling pathway [PATH:ko04910]	NA	TSC2_SCHPO Tuberous sclerosis 2 protein homolog OS=Schizosaccharomyces pombe GN=tsc2 PE=1 SV=1	D8QFX3_SCHCO Putative uncharacterized protein OS=Schizophyllum commune H4-8 GN=SCHCODRAFT_70382 PE=4 SV=1	hypothetical protein SCHCODRAFT_70382 [Schizophyllum commune H4-8]	IPR000331; Rap/ran-GAP IPR018515; Tuberin-type domain	GO:0005096; GTPase activator activity; Molecular Function GO:0005622; intracellular; Cellular Component GO:0043547; positive regulation of GTPase activity; Biological Process GO:0051056; regulation of small GTPase mediated signal transduction; Biological Process
G_lucidum_10007854	NA	NA	NA	NA	NA	NA	NA	NA
G_lucidum_10007855	PF00069.19;	K12572 PAN3 PAB-dependent poly(A)-specific ribonuclease subunit 3 -- Unclassified; Genetic Information Processing; Translation proteins	NA	PAN3_CRYNE PAB-dependent poly(A)-specific ribonuclease subunit PAN3 OS=Cryptococcus neoformans GN=PAN3 PE=3 SV=1	A8NJ49_COPC7 Putative uncharacterized protein OS=Coprinopsis cinerea (strain Okayama-7 / 130 / FGSC 9003) GN=CC1G_09103 PE=4 SV=1	hypothetical protein CC1G_09103 [Coprinopsis cinerea okayama7#130]	IPR000571; Zinc finger, CCCH-type IPR000719; Protein kinase, catalytic domain IPR011009; Protein kinase-like domain IPR017442; Serine/threonine-protein kinase-like domain	GO:0003676; nucleic acid binding; Molecular Function GO:0004672; protein kinase activity; Molecular Function GO:0005524; ATP binding; Molecular Function GO:0006468; protein phosphorylation; Biological Process GO:0008270; zinc ion binding; Molecular Function
G_lucidum_10007856	NA	K03137 TFIIE2 transcription initiation factor TFIIE beta subunit -- Genetic Information Processing; Transcription; Basal transcription factors [PATH:ko03022]	COG5174 Transcription initiation factor IIE, beta subunit K Transcription ;	T2EB_SCHPO Transcription initiation factor IIE subunit beta OS=Schizosaccharomyces pombe GN=tfa2 PE=1 SV=2	B0DSF0_LACBS Predicted protein OS=Laccaria bicolor (strain S238N-H82) GN=LACBIDRAFT_309484 PE=4 SV=1	predicted protein [Laccaria bicolor S238N-H82]	IPR003166; Transcription factor TFIIE beta subunit, DNA-binding domain IPR016656; Transcription initiation factor TFIIE, beta subunit	GO:0003702; RNA polymerase II transcription factor activity; Molecular Function GO:0005673; transcription factor TFIIE complex; Cellular Component GO:0006367; transcription initiation from RNA polymerase II promoter; Biological Process
G_lucidum_10007857	PF01909.17;PF03828.13;	K13291 TUT terminal uridylyltransferase 2.7.7.52 Unclassified; Genetic Information Processing; Others	COG5260 DNA polymerase sigma L Replication, recombination and repair ;	CID1_SCHPO Poly(A) RNA polymerase protein cid1 OS=Schizosaccharomyces pombe GN=cid1 PE=2 SV=2	B0D7E5_LACBS Predicted protein OS=Laccaria bicolor (strain S238N-H82) GN=LACBIDRAFT_318909 PE=4 SV=1	predicted protein [Laccaria bicolor S238N-H82]	IPR002058; PAP/25A-associated IPR002934; Nucleotidyl transferase domain	GO:0016779; nucleotidyltransferase activity; Molecular Function
G_lucidum_10007858	NA	NA	NA	NA	B8PPS5_POSPM Predicted protein (Fragment) OS=Postia placenta (strain ATCC 44394 / Madison 698-R) GN=POSPLDRAFT_92164 PE=4 SV=1	predicted protein [Postia placenta Mad-698-R]	NA	NA
G_lucidum_10007859	NA	NA	NA	HTR5B_XENTR HEAT repeat-containing protein 5B OS=Xenopus tropicalis GN=heatr5b PE=2 SV=1	A8NA90_COPC7 Clathrin-coated vesicle protein OS=Coprinopsis cinerea (strain Okayama-7 / 130 / FGSC 9003) GN=CC1G_08346 PE=4 SV=2	clathrin-coated vesicle protein [Coprinopsis cinerea okayama7#130]	IPR011989; Armadillo-like helical IPR016024; Armadillo-type fold	GO:0005488; binding; Molecular Function
G_lucidum_10007860	PF00076.16;PF00933.15;	K01207 E3.2.1.52, nagZ beta-N-acetylhexosaminidase 3.2.1.52 Metabolism; Carbohydrate Metabolism; Amino sugar and nucleotide sugar metabolism [PATH:ko00520]	COG1472 Beta-glucosidase-related glycosidases G Carbohydrate transport and metabolism ;	YBBD_BACSU Uncharacterized lipoprotein ybbD OS=Bacillus subtilis GN=ybbD PE=1 SV=1	D8Q4Y6_SCHCO Glycoside hydrolase family 3 protein (Fragment) OS=Schizophyllum commune H4-8 GN=SCHCODRAFT_76670 PE=4 SV=1	glycoside hydrolase family 3 protein [Schizophyllum commune H4-8]	IPR000504; RNA recognition motif domain IPR001764; Glycoside hydrolase, family 3, N-terminal IPR012677; Nucleotide-binding, alpha-beta plait IPR017853; Glycoside hydrolase, catalytic core	GO:0000166; nucleotide binding; Molecular Function GO:0003676; nucleic acid binding; Molecular Function GO:0004553; hydrolase activity, hydrolyzing O-glycosyl compounds; Molecular Function GO:0005975; carbohydrate metabolic process; Biological Process
G_lucidum_10007861	PF00790.13;PF08648.6;	K12182 HGS, HRS, VPS27 hepatocyte growth factor-regulated tyrosine kinase substrate -- Cellular Processes; Transport and Catabolism; Endocytosis [PATH:ko04144] Cellular Processes; Transport and Catabolism; Phagosome [PATH:ko04145]	NA	TM1L2_MOUSE TOM1-like protein 2 OS=Mus musculus GN=Tom1l2 PE=1 SV=1	B0D7M1_LACBS Predicted protein OS=Laccaria bicolor (strain S238N-H82) GN=LACBIDRAFT_318997 PE=4 SV=1	predicted protein [Laccaria bicolor S238N-H82]	IPR002014; VHS IPR008942; ENTH/VHS IPR018205; VHS subgroup	GO:0006886; intracellular protein transport; Biological Process
G_lucidum_10007862	PF01937.13;	NA	NA	YCFD_SCHPO UPF0364 protein C1393.13 OS=Schizosaccharomyces pombe GN=SPCC1393.13 PE=2 SV=1	A8P5N0_COPC7 DUF89 domain-containing protein OS=Coprinopsis cinerea (strain Okayama-7 / 130 / FGSC 9003) GN=CC1G_05536 PE=4 SV=2	DUF89 domain-containing protein [Coprinopsis cinerea okayama7#130]	IPR002791; Domain of unknown function DUF89	NA
G_lucidum_10007863	PF10644.3;	NA	NA	DML1_ASPCL Protein dml1 OS=Aspergillus clavatus GN=dml1 PE=3 SV=1	B8P6F2_POSPM Predicted protein OS=Postia placenta (strain ATCC 44394 / Madison 698-R) GN=POSPLDRAFT_94646 PE=4 SV=1	predicted protein [Postia placenta Mad-698-R]	IPR003008; Tubulin/FtsZ, GTPase domain IPR019605; Misato Segment II, myosin-like	GO:0043234; protein complex; Cellular Component GO:0051258; protein polymerization; Biological Process
G_lucidum_10007864	PF05362.1;PF02190.10;PF00004.23;	K01338 E3.4.21.53, lon ATP-dependent Lon protease 3.4.21.53 Metabolism; Enzyme Families; Peptidases [BR:ko01002] Cellular Processes; Cell Growth and Death; Cell cycle - Caulobacter [PATH:ko04112]	COG0466 ATP-dependent Lon protease, bacterial type O Posttranslational modification, protein turnover, chaperones ;	LONP2_YARLI Lon protease homolog 2, peroxisomal OS=Yarrowia lipolytica GN=YALI0F23595g PE=3 SV=1	B8PDD1_POSPM Lon protease homolog OS=Postia placenta (strain ATCC 44394 / Madison 698-R) GN=POSPLDRAFT_88045 PE=3 SV=1	predicted protein [Postia placenta Mad-698-R]	IPR001984; Peptidase S16, Lon protease, C-terminal IPR003111; Peptidase S16, lon N-terminal IPR003593; ATPase, AAA+ type, core IPR003959; ATPase, AAA-type, core IPR004815; Peptidase S16, ATP-dependent protease La IPR008268; Peptidase S16, active site IPR008269; Peptidase S16, Lon C-terminal IPR015947; Pseudouridine synthase/archaeosine transglycosylase-like IPR020568; Ribosomal protein S5 domain …	GO:0000166; nucleotide binding; Molecular Function GO:0004176; ATP-dependent peptidase activity; Molecular Function GO:0004252; serine-type endopeptidase activity; Molecular Function GO:0005524; ATP binding; Molecular Function GO:0006508; proteolysis; Biological Process GO:0017111; nucleoside-triphosphatase activity; Molecular Function
G_lucidum_10007865	NA	NA	NA	NA	NA	NA	NA	NA
G_lucidum_10007866	NA	NA	NA	NA	C3ZAC2_BRAFL Putative uncharacterized protein OS=Branchiostoma floridae GN=BRAFLDRAFT_87696 PE=4 SV=1	hypothetical protein BRAFLDRAFT_87696 [Branchiostoma floridae]	NA	NA
G_lucidum_10007867	NA	NA	NA	NA	NA	NA	NA	NA
G_lucidum_10007868	NA	NA	NA	NA	D8PKC8_SCHCO Putative uncharacterized protein (Fragment) OS=Schizophyllum commune H4-8 GN=SCHCODRAFT_103113 PE=4 SV=1	hypothetical protein SCHCODRAFT_103113 [Schizophyllum commune H4-8]	NA	NA
G_lucidum_10007869	PF02383.12;	K01099 E3.1.3.36 phosphatidylinositol-bisphosphatase 3.1.3.36 Metabolism; Carbohydrate Metabolism; Inositol phosphate metabolism [PATH:ko00562] Environmental Information Processing; Signal Transduction; Phosphatidylinositol signaling system [PATH:ko04070]	COG5329 Phosphoinositide polyphosphatase (Sac family) T Signal transduction mechanisms ;	FIG4_YEAST Polyphosphoinositide phosphatase OS=Saccharomyces cerevisiae GN=FIG4 PE=1 SV=1	D8QIA7_SCHCO Putative uncharacterized protein OS=Schizophyllum commune H4-8 GN=SCHCODRAFT_79409 PE=4 SV=1	hypothetical protein SCHCODRAFT_79409 [Schizophyllum commune H4-8]	IPR002013; Synaptojanin, N-terminal	GO:0042578; phosphoric ester hydrolase activity; Molecular Function
G_lucidum_10007870	NA	K09202 SWI5 regulatory protein SWI5 -- Genetic Information Processing; Transcription; Transcription factors [BR:ko03000] Cellular Processes; Cell Growth and Death; Cell cycle - yeast [PATH:ko04111]	COG5048 FOG: Zn-finger R General function prediction only ;	SWI5_YEAST Transcriptional factor SWI5 OS=Saccharomyces cerevisiae GN=SWI5 PE=1 SV=1	B8PHE0_POSPM Predicted protein OS=Postia placenta (strain ATCC 44394 / Madison 698-R) GN=POSPLDRAFT_105560 PE=4 SV=1	predicted protein [Postia placenta Mad-698-R]	IPR007087; Zinc finger, C2H2-type IPR013087; Zinc finger, C2H2-type/integrase, DNA-binding IPR015880; Zinc finger, C2H2-like	GO:0003676; nucleic acid binding; Molecular Function GO:0005622; intracellular; Cellular Component GO:0008270; zinc ion binding; Molecular Function
G_lucidum_10007871	PF00400.26;	K06666 TUP1 glucose repression regulatory protein TUP1 -- Cellular Processes; Cell Growth and Death; Cell cycle - yeast [PATH:ko04111]	NA	RCO1_NEUCR Transcriptional repressor rco-1 OS=Neurospora crassa GN=rco-1 PE=4 SV=2	D8QE21_SCHCO Putative uncharacterized protein OS=Schizophyllum commune H4-8 GN=SCHCODRAFT_59767 PE=4 SV=1	hypothetical protein SCHCODRAFT_59767 [Schizophyllum commune H4-8]	IPR001680; WD40 repeat IPR011046; WD40 repeat-like-containing domain IPR015943; WD40/YVTN repeat-like-containing domain IPR017986; WD40-repeat-containing domain IPR019775; WD40 repeat, conserved site IPR019781; WD40 repeat, subgroup IPR019782; WD40 repeat 2 IPR020472; G-protein beta WD-40 repeat	GO:0005515; protein binding; Molecular Function
G_lucidum_10007872	PF00130.16;PF00069.19;	K05743 LIMK1 LIM domain kinase 1 2.7.11.1 Metabolism; Enzyme Families; Protein kinases [BR:ko01001] Cellular Processes; Cell Motility; Regulation of actin cytoskeleton [PATH:ko04810] Organismal Systems; Immune System; Fc gamma R-mediated phagocytosis [PATH:ko04666] Organismal Systems; Development; Axon guidance [PATH:ko04360]	NA	GEFX_DICDI RasGEF domain-containing serine/threonine-protein kinase X OS=Dictyostelium discoideum GN=gefX PE=2 SV=1	A8NJH7_COPC7 TKL/LISK/LISK-DD1 protein kinase OS=Coprinopsis cinerea (strain Okayama-7 / 130 / FGSC 9003) GN=CC1G_09729 PE=4 SV=1	TKL/LISK/LISK-DD1 protein kinase [Coprinopsis cinerea okayama7#130]	IPR000719; Protein kinase, catalytic domain IPR001245; Serine-threonine/tyrosine-protein kinase IPR002219; Protein kinase C-like, phorbol ester/diacylglycerol binding IPR002290; Serine/threonine-protein kinase domain IPR008271; Serine/threonine-protein kinase, active site IPR011009; Protein kinase-like domain IPR017441; Protein kinase, ATP binding site IPR017442; Serine/threonine-protein kinase-l…	GO:0004672; protein kinase activity; Molecular Function GO:0004674; protein serine/threonine kinase activity; Molecular Function GO:0005524; ATP binding; Molecular Function GO:0006468; protein phosphorylation; Biological Process GO:0023034; intracellular signaling pathway; Biological Process
G_lucidum_10007873	NA	NA	NA	NA	NA	NA	NA	NA
G_lucidum_10007874	PF00324.15;	K09885 AQPF aquaporin rerated protein, other eukaryote -- Environmental Information Processing; Signaling Molecules and Interaction; Ion channels [BR:ko04040]	COG0531 Amino acid transporters E Amino acid transport and metabolism ;	YKM2_SCHPO Uncharacterized amino-acid permease PB24D3.02c OS=Schizosaccharomyces pombe GN=SPAPB24D3.02c PE=2 SV=1	B0DVS7_LACBS APC amino acid permease OS=Laccaria bicolor (strain S238N-H82) GN=LACBIDRAFT_254728 PE=4 SV=1	APC amino acid permease [Laccaria bicolor S238N-H82]	IPR002293; Amino acid/polyamine transporter I IPR004840; Amino acid permease, conserved site IPR004841; Amino acid permease domain	GO:0006810; transport; Biological Process GO:0006865; amino acid transport; Biological Process GO:0015171; amino acid transmembrane transporter activity; Molecular Function GO:0016020; membrane; Cellular Component GO:0016021; integral to membrane; Cellular Component GO:0055085; transmembrane transport; Biological Process
G_lucidum_10007875	NA	NA	NA	NA	B8PPS5_POSPM Predicted protein (Fragment) OS=Postia placenta (strain ATCC 44394 / Madison 698-R) GN=POSPLDRAFT_92164 PE=4 SV=1	predicted protein [Postia placenta Mad-698-R]	NA	NA
G_lucidum_10007876	NA	NA	COG5604 Uncharacterized conserved protein S Function unknown ;	NOC2_YEAST Nucleolar complex protein 2 OS=Saccharomyces cerevisiae GN=NOC2 PE=1 SV=2	D8QFJ0_SCHCO Putative uncharacterized protein OS=Schizophyllum commune H4-8 GN=SCHCODRAFT_258374 PE=4 SV=1	hypothetical protein SCHCODRAFT_258374 [Schizophyllum commune H4-8]	NA	NA
G_lucidum_10007877	PF03715.7;	NA	COG5604 Uncharacterized conserved protein S Function unknown ;	YKY4_SCHPO Uncharacterized NOC2 family protein C1142.04 OS=Schizosaccharomyces pombe GN=SPAC1142.04 PE=1 SV=1	A8NJS7_COPC7 Putative uncharacterized protein OS=Coprinopsis cinerea (strain Okayama-7 / 130 / FGSC 9003) GN=CC1G_11196 PE=4 SV=1	hypothetical protein CC1G_11196 [Coprinopsis cinerea okayama7#130]	IPR005343; Uncharacterised protein family UPF0120	NA
G_lucidum_10007878	NA	NA	NA	NA	A8NJS9_COPC7 Putative uncharacterized protein OS=Coprinopsis cinerea (strain Okayama-7 / 130 / FGSC 9003) GN=CC1G_11197 PE=4 SV=1	hypothetical protein CC1G_11197 [Coprinopsis cinerea okayama7#130]	NA	NA
G_lucidum_10007879	NA	K04044 hscA molecular chaperone HscA -- Genetic Information Processing; Folding, Sorting and Degradation; Chaperones and folding catalysts [BR:ko03110]	NA	HS12B_HUMAN Heat shock 70 kDa protein 12B OS=Homo sapiens GN=HSPA12B PE=1 SV=2	B0D7P7_LACBS Predicted protein OS=Laccaria bicolor (strain S238N-H82) GN=LACBIDRAFT_319032 PE=4 SV=1	predicted protein [Laccaria bicolor S238N-H82]	NA	NA
G_lucidum_10007880	PF04030.8;PF01565.17;	K00103 E1.1.3.8 L-gulonolactone oxidase 1.1.3.8 Metabolism; Carbohydrate Metabolism; Ascorbate and aldarate metabolism [PATH:ko00053]	COG0277 FAD/FMN-containing dehydrogenases C Energy production and conversion ;	GGLO_SCYTO L-gulonolactone oxidase OS=Scyliorhinus torazame GN=GULO PE=2 SV=1	A8NJT1_COPC7 Putative uncharacterized protein OS=Coprinopsis cinerea (strain Okayama-7 / 130 / FGSC 9003) GN=CC1G_11199 PE=4 SV=2	hypothetical protein CC1G_11199 [Coprinopsis cinerea okayama7#130]	IPR006094; FAD linked oxidase, N-terminal IPR007173; D-arabinono-1,4-lactone oxidase IPR016166; FAD-binding, type 2 IPR016168; FAD-linked oxidase, FAD-binding, subdomain 2	GO:0003824; catalytic activity; Molecular Function GO:0003885; D-arabinono-1,4-lactone oxidase activity; Molecular Function GO:0016020; membrane; Cellular Component GO:0016491; oxidoreductase activity; Molecular Function GO:0050660; FAD or FADH2 binding; Molecular Function GO:0055114; oxidation-reduction process; Biological Process
G_lucidum_10007881	NA	NA	NA	NA	NA	NA	NA	NA
G_lucidum_10007882	PF00179.1;	K04555 UBE2G2, UBC7 ubiquitin-conjugating enzyme E2 G2 6.3.2.19 Genetic Information Processing; Folding, Sorting and Degradation; Protein processing in endoplasmic reticulum [PATH:ko04141] Genetic Information Processing; Folding, Sorting and Degradation; Ubiquitin mediated proteolysis [PATH:ko04120] Genetic Information Processing; Folding, Sorting and Degradation; Ubiquitin system [BR:ko04121] Hu…	NA	UBC7_SCHPO Ubiquitin-conjugating enzyme E2-18 kDa OS=Schizosaccharomyces pombe GN=ubc7 PE=2 SV=2	B0D7P9_LACBS Predicted protein OS=Laccaria bicolor (strain S238N-H82) GN=LACBIDRAFT_190123 PE=3 SV=1	predicted protein [Laccaria bicolor S238N-H82]	IPR000608; Ubiquitin-conjugating enzyme, E2 IPR016135; Ubiquitin-conjugating enzyme/RWD-like IPR023313; Ubiquitin-conjugating enzyme, active site	GO:0016881; acid-amino acid ligase activity; Molecular Function GO:0043687; post-translational protein modification; Biological Process
G_lucidum_10007883	PF04560.14;PF00562.22;PF04566.7;PF04565.10;PF04563.9;PF04561.8;PF04567.11;	K03021 RPC2 DNA-directed RNA polymerase III subunit C2 2.7.7.6 Metabolism; Nucleotide Metabolism; Purine metabolism [PATH:ko00230] Metabolism; Nucleotide Metabolism; Pyrimidine metabolism [PATH:ko00240] Genetic Information Processing; Transcription; RNA polymerase [PATH:ko03020] Organismal Systems; Immune System; Cytosolic DNA-sensing pathway [PATH:ko04623]	COG0085 DNA-directed RNA polymerase, beta subunit/140 kD subunit K Transcription ;	RPC2_SCHPO DNA-directed RNA polymerase III subunit RPC2 OS=Schizosaccharomyces pombe GN=rpc2 PE=2 SV=1	B0D7Q0_LACBS DNA-directed RNA polymerase OS=Laccaria bicolor (strain S238N-H82) GN=LACBIDRAFT_190099 PE=3 SV=1	predicted protein [Laccaria bicolor S238N-H82]	IPR007120; DNA-directed RNA polymerase, subunit 2, domain 6 IPR007121; RNA polymerase, beta subunit, conserved site IPR007641; RNA polymerase Rpb2, domain 7 IPR007642; RNA polymerase Rpb2, domain 2 IPR007644; RNA polymerase, beta subunit, protrusion IPR007645; RNA polymerase Rpb2, domain 3 IPR007646; RNA polymerase Rpb2, domain 4 IPR007647; RNA polymerase Rpb2, domain 5 IPR014724; RNA polymerase …	GO:0003677; DNA binding; Molecular Function GO:0003899; DNA-directed RNA polymerase activity; Molecular Function GO:0006350; transcription; Biological Process GO:0032549; ribonucleoside binding; Molecular Function
G_lucidum_10007884	PF12708.1;	K01210 E3.2.1.58 glucan 1,3-beta-glucosidase 3.2.1.58 Metabolism; Carbohydrate Metabolism; Starch and sucrose metabolism [PATH:ko00500]	NA	EXG1_COCCA Glucan 1,3-beta-glucosidase OS=Cochliobolus carbonum GN=EXG1 PE=1 SV=1	Q401R8_LENED Exo-beta-1,3-glucanase OS=Lentinula edodes GN=exg2 PE=2 SV=1	exo-beta-1,3-glucanase [Lentinula edodes]	IPR011050; Pectin lyase fold/virulence factor IPR012334; Pectin lyase fold	NA
G_lucidum_10007885	PF04178.6;	NA	COG5102 Membrane protein involved in ER to Golgi transport U Intracellular trafficking, secretion, and vesicular transport ;	SFT2_SCHPO Protein transport protein sft2 OS=Schizosaccharomyces pombe GN=sft2 PE=2 SV=1	D8QFJ2_SCHCO Putative uncharacterized protein OS=Schizophyllum commune H4-8 GN=SCHCODRAFT_83256 PE=4 SV=1	hypothetical protein SCHCODRAFT_83256 [Schizophyllum commune H4-8]	IPR007305; Vesicle transport protein, Got1/SFT2-like IPR011691; Vesicle transport protein, SFT2-like	GO:0006810; transport; Biological Process GO:0016021; integral to membrane; Cellular Component GO:0016192; vesicle-mediated transport; Biological Process
G_lucidum_10007886	PF11894.2;	K10609 CUL4 cullin 4 -- Genetic Information Processing; Folding, Sorting and Degradation; Ubiquitin mediated proteolysis [PATH:ko04120] Genetic Information Processing; Folding, Sorting and Degradation; Ubiquitin system [BR:ko04121] Genetic Information Processing; Replication and Repair; Nucleotide excision repair [PATH:ko03420] Genetic Information Processing; Replication and Repair; DNA repair an…	NA	NU205_HUMAN Nuclear pore complex protein Nup205 OS=Homo sapiens GN=NUP205 PE=1 SV=3	A8NJT9_COPC7 Putative uncharacterized protein OS=Coprinopsis cinerea (strain Okayama-7 / 130 / FGSC 9003) GN=CC1G_11206 PE=4 SV=1	hypothetical protein CC1G_11206 [Coprinopsis cinerea okayama7#130]	IPR021827; Protein of unknown function DUF3414	NA
G_lucidum_10007887	PF00583.18;	K00670 E2.3.1.88 peptide alpha-N-acetyltransferase 2.3.1.88 Unclassified; Metabolism; Others	COG0456 Acetyltransferases R General function prediction only ;	NAA30_SCHPO N-alpha-acetyltransferase 30, NatC catalytic subunit OS=Schizosaccharomyces pombe GN=MAK3 PE=2 SV=1	A8NJN8_COPC7 Putative uncharacterized protein OS=Coprinopsis cinerea (strain Okayama-7 / 130 / FGSC 9003) GN=CC1G_12346 PE=4 SV=2	hypothetical protein CC1G_12346 [Coprinopsis cinerea okayama7#130]	IPR000182; GCN5-related N-acetyltransferase (GNAT) domain IPR016181; Acyl-CoA N-acyltransferase	GO:0008080; N-acetyltransferase activity; Molecular Function GO:0008152; metabolic process; Biological Process
G_lucidum_10007888	PF00012.14;	K09490 HSPA5, BIP heat shock 70kDa protein 5 -- Genetic Information Processing; Folding, Sorting and Degradation; Chaperones and folding catalysts [BR:ko03110] Genetic Information Processing; Folding, Sorting and Degradation; Protein export [PATH:ko03060] Genetic Information Processing; Folding, Sorting and Degradation; Protein processing in endoplasmic reticulum [PATH:ko04141] Human Diseases; Ne…	COG0443 Molecular chaperone O Posttranslational modification, protein turnover, chaperones ;	GRP78_ASPNG 78 kDa glucose-regulated protein homolog OS=Aspergillus niger GN=bipA PE=2 SV=1	B0D7M5_LACBS Predicted protein OS=Laccaria bicolor (strain S238N-H82) GN=LACBIDRAFT_189966 PE=3 SV=1	predicted protein [Laccaria bicolor S238N-H82]	IPR001023; Heat shock protein Hsp70 IPR013126; Heat shock protein 70 IPR018181; Heat shock protein 70, conserved site	GO:0005524; ATP binding; Molecular Function
G_lucidum_10007889	NA	NA	NA	NA	B8P824_POSPM Predicted protein OS=Postia placenta (strain ATCC 44394 / Madison 698-R) GN=POSPLDRAFT_94277 PE=4 SV=1	predicted protein [Postia placenta Mad-698-R]	NA	NA
G_lucidum_10007890	NA	K01567 E3.-.-.- -- -- Unclassified; Metabolism; Others	COG1607 Acyl-CoA hydrolase I Lipid transport and metabolism ;	ACOT9_MOUSE Acyl-coenzyme A thioesterase 9, mitochondrial OS=Mus musculus GN=Acot9 PE=1 SV=1	B8PDD9_POSPM Predicted protein (Fragment) OS=Postia placenta (strain ATCC 44394 / Madison 698-R) GN=POSPLDRAFT_23123 PE=4 SV=1	predicted protein [Postia placenta Mad-698-R]	NA	NA
G_lucidum_10007891	PF00179.1;	K10575 UBE2G1, UBC7 ubiquitin-conjugating enzyme E2 G1 6.3.2.19 Genetic Information Processing; Folding, Sorting and Degradation; Protein processing in endoplasmic reticulum [PATH:ko04141] Genetic Information Processing; Folding, Sorting and Degradation; Ubiquitin mediated proteolysis [PATH:ko04120] Genetic Information Processing; Folding, Sorting and Degradation; Ubiquitin system [BR:ko04121] Hu…	COG5078 Ubiquitin-protein ligase O Posttranslational modification, protein turnover, chaperones ;	UB2G1_RAT Ubiquitin-conjugating enzyme E2 G1 OS=Rattus norvegicus GN=Ube2g1 PE=2 SV=3	Q4PBT7_USTMA Ubiquitin carrier protein OS=Ustilago maydis GN=UM02426.1 PE=3 SV=1	hypothetical protein UM02426.1 [Ustilago maydis 521]	IPR000608; Ubiquitin-conjugating enzyme, E2 IPR016135; Ubiquitin-conjugating enzyme/RWD-like IPR023313; Ubiquitin-conjugating enzyme, active site	GO:0016881; acid-amino acid ligase activity; Molecular Function GO:0043687; post-translational protein modification; Biological Process
G_lucidum_10007892	PF06792.5;	NA	COG5441 Uncharacterized conserved protein S Function unknown ;	Y1794_CLOTE UPF0261 protein CTC_01794 OS=Clostridium tetani GN=CTC_01794 PE=3 SV=2	D1Z5D2_SORMK Whole genome shotgun sequence assembly, scaffold_4 OS=Sordaria macrospora (strain ATCC MYA-333 / DSM 997 / K(L3346) / K-hell) GN=SMAC_01553 PE=4 SV=1	unnamed protein product [Sordaria macrospora]	IPR008322; Uncharacterised protein family UPF0261	NA
G_lucidum_10007893	NA	NA	NA	NA	NA	NA	NA	NA
G_lucidum_10007894	NA	NA	NA	NA	A8NI85_COPC7 Putative uncharacterized protein OS=Coprinopsis cinerea (strain Okayama-7 / 130 / FGSC 9003) GN=CC1G_01611 PE=4 SV=1	hypothetical protein CC1G_01611 [Coprinopsis cinerea okayama7#130]	NA	NA
G_lucidum_10007895	NA	NA	NA	NA	NA	NA	NA	NA
G_lucidum_10007896	NA	NA	NA	NA	B8P4Z2_POSPM Predicted protein OS=Postia placenta (strain ATCC 44394 / Madison 698-R) GN=POSPLDRAFT_106354 PE=4 SV=1	predicted protein [Postia placenta Mad-698-R]	NA	NA
G_lucidum_10007897	PF04729.7;	K10753 ASF1 histone chaperone ASF1 -- Genetic Information Processing; Replication and Repair; Chromosome [BR:ko03036]	COG5137 Histone chaperone involved in gene silencing KB Transcription ; Chromatin structure and dynamics ;	ASF1_USTMA Histone chaperone ASF1 OS=Ustilago maydis GN=ASF1 PE=3 SV=1	D8QG21_SCHCO Putative uncharacterized protein OS=Schizophyllum commune H4-8 GN=SCHCODRAFT_17365 PE=4 SV=1	hypothetical protein SCHCODRAFT_17365 [Schizophyllum commune H4-8]	IPR006818; Histone chaperone, ASF1-like	GO:0005634; nucleus; Cellular Component GO:0006333; chromatin assembly or disassembly; Biological Process
G_lucidum_10007898	NA	NA	NA	NA	A8NIG0_COPC7 Putative uncharacterized protein OS=Coprinopsis cinerea (strain Okayama-7 / 130 / FGSC 9003) GN=CC1G_09402 PE=4 SV=2	hypothetical protein CC1G_09402 [Coprinopsis cinerea okayama7#130]	NA	NA
G_lucidum_10007899	NA	NA	NA	NA	NA	NA	NA	NA
G_lucidum_10007900	PF01529.14;	K06867 K06867 -- -- Unclassified; Poorly Characterized; General function prediction only	COG5273 Uncharacterized protein containing DHHC-type Zn finger R General function prediction only ;	ZDH20_MOUSE Probable palmitoyltransferase ZDHHC20 OS=Mus musculus GN=Zdhhc20 PE=2 SV=1	D8QGC8_SCHCO Putative uncharacterized protein OS=Schizophyllum commune H4-8 GN=SCHCODRAFT_258446 PE=3 SV=1	hypothetical protein SCHCODRAFT_258446 [Schizophyllum commune H4-8]	IPR001594; Zinc finger, DHHC-type, palmitoyltransferase	GO:0008270; zinc ion binding; Molecular Function
G_lucidum_10007901	PF08609.4;	K14001 SIL1, SLS1 nucleotide exchange factor SIL1 -- Genetic Information Processing; Folding, Sorting and Degradation; Protein processing in endoplasmic reticulum [PATH:ko04141]	NA	FES1_USTMA Hsp70 nucleotide exchange factor FES1 OS=Ustilago maydis GN=FES1 PE=3 SV=1	B8P4Z9_POSPM Nucleotide exchange factors-like protein (Fragment) OS=Postia placenta (strain ATCC 44394 / Madison 698-R) GN=POSPLDRAFT_134866 PE=4 SV=1	nucleotide exchange factors-like protein [Postia placenta Mad-698-R]	IPR011989; Armadillo-like helical IPR013918; Nucleotide exchange factor Fes1 IPR016024; Armadillo-type fold	GO:0005488; binding; Molecular Function
G_lucidum_10007902	NA	NA	NA	NA	A8NIM7_COPC7 Putative uncharacterized protein OS=Coprinopsis cinerea (strain Okayama-7 / 130 / FGSC 9003) GN=CC1G_09447 PE=4 SV=2	hypothetical protein CC1G_09447 [Coprinopsis cinerea okayama7#130]	NA	NA
G_lucidum_10007903	NA	NA	NA	NA	A8NI92_COPC7 Putative uncharacterized protein OS=Coprinopsis cinerea (strain Okayama-7 / 130 / FGSC 9003) GN=CC1G_01617 PE=4 SV=2	hypothetical protein CC1G_01617 [Coprinopsis cinerea okayama7#130]	NA	NA
G_lucidum_10007904	NA	NA	NA	NA	NA	NA	NA	NA
G_lucidum_10007905	PF00202.15;	K00819 E2.6.1.13, rocD ornithine--oxo-acid transaminase 2.6.1.13 Metabolism; Amino Acid Metabolism; Arginine and proline metabolism [PATH:ko00330]	COG4992 Ornithine/acetylornithine aminotransferase E Amino acid transport and metabolism ;	OAT_SCHPO Probable ornithine aminotransferase OS=Schizosaccharomyces pombe GN=SPBC21C3.08c PE=2 SV=1	B0D759_LACBS Ornithine-oxo-acid aminotransferase OS=Laccaria bicolor (strain S238N-H82) GN=LACBIDRAFT_184382 PE=3 SV=1	ornithine-oxo-acid aminotransferase [Laccaria bicolor S238N-H82]	IPR005814; Aminotransferase class-III IPR010164; Ornithine aminotransferase IPR015421; Pyridoxal phosphate-dependent transferase, major region, subdomain 1 IPR015422; Pyridoxal phosphate-dependent transferase, major region, subdomain 2 IPR015424; Pyridoxal phosphate-dependent transferase, major domain	GO:0003824; catalytic activity; Molecular Function GO:0008483; transaminase activity; Molecular Function GO:0030170; pyridoxal phosphate binding; Molecular Function
G_lucidum_10007906	NA	NA	NA	NA	A8NIM0_COPC7 Putative uncharacterized protein OS=Coprinopsis cinerea (strain Okayama-7 / 130 / FGSC 9003) GN=CC1G_09442 PE=4 SV=2	GH115 alpha-glucuronidase [Schizophyllum commune]	NA	NA
G_lucidum_10007907	NA	NA	NA	NA	A8NIM0_COPC7 Putative uncharacterized protein OS=Coprinopsis cinerea (strain Okayama-7 / 130 / FGSC 9003) GN=CC1G_09442 PE=4 SV=2	hypothetical protein CC1G_09442 [Coprinopsis cinerea okayama7#130]	NA	NA
G_lucidum_10007908	NA	NA	NA	NA	NA	NA	NA	NA
G_lucidum_10007909	PF00135.22;	K01044 E3.1.1.1 carboxylesterase 3.1.1.1 Metabolism; Biosynthesis of Other Secondary Metabolites; Tropane, piperidine and pyridine alkaloid biosynthesis [PATH:ko00960] Metabolism; Xenobiotics Biodegradation and Metabolism; Drug metabolism - other enzymes [PATH:ko00983]	COG2272 Carboxylesterase type B I Lipid transport and metabolism ;	LIP1_GEOFE Lipase 1 OS=Geotrichum fermentans GN=LIP1 PE=1 SV=1	D5GRP3_9AGAR Esterase 1 OS=Pleurotus sapidus GN=e1 PE=2 SV=1	esterase 1 [Pleurotus sapidus]	IPR002018; Carboxylesterase, type B	NA
G_lucidum_10007910	PF00293.1;	NA	NA	NA	A8NIH4_COPC7 Putative uncharacterized protein OS=Coprinopsis cinerea (strain Okayama-7 / 130 / FGSC 9003) GN=CC1G_09410 PE=3 SV=2	hypothetical protein CC1G_09410 [Coprinopsis cinerea okayama7#130]	IPR000086; NUDIX hydrolase domain IPR015797; NUDIX hydrolase domain-like IPR020084; NUDIX hydrolase, conserved site IPR020476; NUDIX hydrolase	GO:0016787; hydrolase activity; Molecular Function
G_lucidum_10007911	NA	NA	NA	NA	B0DVA6_LACBS Predicted protein OS=Laccaria bicolor (strain S238N-H82) GN=LACBIDRAFT_295583 PE=4 SV=1	predicted protein [Laccaria bicolor S238N-H82]	IPR000028; Chloroperoxidase	GO:0004601; peroxidase activity; Molecular Function
G_lucidum_10007912	NA	K03363 CDC20 cell division cycle 20, cofactor of APC complex -- Genetic Information Processing; Folding, Sorting and Degradation; Ubiquitin mediated proteolysis [PATH:ko04120] Genetic Information Processing; Folding, Sorting and Degradation; Ubiquitin system [BR:ko04121] Genetic Information Processing; Replication and Repair; Chromosome [BR:ko03036] Cellular Processes; Cell Growth and Death; Cell…	NA	SLP1_SCHPO WD repeat-containing protein slp1 OS=Schizosaccharomyces pombe GN=slp1 PE=1 SV=1	B0CXH1_LACBS Predicted protein OS=Laccaria bicolor (strain S238N-H82) GN=LACBIDRAFT_311479 PE=4 SV=1	predicted protein [Laccaria bicolor S238N-H82]	IPR001680; WD40 repeat IPR011046; WD40 repeat-like-containing domain IPR015943; WD40/YVTN repeat-like-containing domain IPR017986; WD40-repeat-containing domain IPR019775; WD40 repeat, conserved site IPR019781; WD40 repeat, subgroup IPR019782; WD40 repeat 2	GO:0005515; protein binding; Molecular Function
G_lucidum_10007913	NA	NA	NA	NA	D8QG44_SCHCO Putative uncharacterized protein OS=Schizophyllum commune H4-8 GN=SCHCODRAFT_70404 PE=4 SV=1	hypothetical protein SCHCODRAFT_70404 [Schizophyllum commune H4-8]	NA	NA
G_lucidum_10007914	NA	NA	NA	NA	NA	NA	NA	NA
G_lucidum_10007915	NA	NA	NA	NA	NA	NA	NA	NA
G_lucidum_10007916	PF00515.22;PF00226.25;	K09527 DNAJC7 DnaJ homolog subfamily C member 7 -- Genetic Information Processing; Folding, Sorting and Degradation; Chaperones and folding catalysts [BR:ko03110]	NA	DNJC7_SCHPO DnaJ homolog subfamily C member 7 homolog OS=Schizosaccharomyces pombe GN=SPBC543.02c PE=2 SV=1	B0E504_LACBS Predicted protein OS=Laccaria bicolor (strain S238N-H82) GN=LACBIDRAFT_186713 PE=4 SV=1	predicted protein [Laccaria bicolor S238N-H82]	IPR001440; Tetratricopeptide TPR-1 IPR001623; Heat shock protein DnaJ, N-terminal IPR003095; Heat shock protein DnaJ IPR011990; Tetratricopeptide-like helical IPR013026; Tetratricopeptide repeat-containing IPR015609; Molecular chaperone, heat shock protein, Hsp40, DnaJ IPR018253; Heat shock protein DnaJ, conserved site IPR019734; Tetratricopeptide repeat	GO:0005488; binding; Molecular Function GO:0005515; protein binding; Molecular Function GO:0006457; protein folding; Biological Process GO:0031072; heat shock protein binding; Molecular Function GO:0051082; unfolded protein binding; Molecular Function
G_lucidum_10007917	NA	K00551 E2.1.1.17, PEMT phosphatidylethanolamine N-methyltransferase 2.1.1.17 Metabolism; Lipid Metabolism; Glycerophospholipid metabolism [PATH:ko00564]	NA	CHO2_SCHPO Phosphatidylethanolamine N-methyltransferase OS=Schizosaccharomyces pombe GN=cho2 PE=1 SV=1	D8QGC6_SCHCO Putative uncharacterized protein OS=Schizophyllum commune H4-8 GN=SCHCODRAFT_258445 PE=4 SV=1	hypothetical protein SCHCODRAFT_258445 [Schizophyllum commune H4-8]	NA	NA
G_lucidum_10007918	NA	NA	NA	NA	NA	NA	NA	NA
G_lucidum_10007919	PF08240.6;PF00107.20;	K00001 E1.1.1.1, adh alcohol dehydrogenase 1.1.1.1 Metabolism; Carbohydrate Metabolism; Glycolysis / Gluconeogenesis [PATH:ko00010] Metabolism; Lipid Metabolism; Fatty acid metabolism [PATH:ko00071] Metabolism; Amino Acid Metabolism; Tyrosine metabolism [PATH:ko00350] Metabolism; Metabolism of Cofactors and Vitamins; Retinol metabolism [PATH:ko00830] Metabolism; Xenobiotics Biodegradation and Met…	COG0604 NADPH:quinone reductase and related Zn-dependent oxidoreductases CR Energy production and conversion ; General function prediction only ;	YGD6_SCHPO Zinc-type alcohol dehydrogenase-like protein C1773.06c OS=Schizosaccharomyces pombe GN=SPBC1773.06c PE=2 SV=1	B8PC22_POSPM Predicted protein OS=Postia placenta (strain ATCC 44394 / Madison 698-R) GN=POSPLDRAFT_105379 PE=4 SV=1	predicted protein [Postia placenta Mad-698-R]	IPR002085; Alcohol dehydrogenase superfamily, zinc-containing IPR011032; GroES-like IPR013149; Alcohol dehydrogenase, C-terminal IPR013154; Alcohol dehydrogenase GroES-like IPR016040; NAD(P)-binding domain IPR020843; Polyketide synthase, enoylreductase	GO:0003824; catalytic activity; Molecular Function GO:0005488; binding; Molecular Function GO:0008152; metabolic process; Biological Process GO:0008270; zinc ion binding; Molecular Function GO:0016491; oxidoreductase activity; Molecular Function GO:0016747; transferase activity, transferring acyl groups other than amino-acyl groups; Molecular Function GO:0055114; oxidation-reduction process; Biol…
G_lucidum_10007920	PF08240.6;PF00107.20;	K00001 E1.1.1.1, adh alcohol dehydrogenase 1.1.1.1 Metabolism; Carbohydrate Metabolism; Glycolysis / Gluconeogenesis [PATH:ko00010] Metabolism; Lipid Metabolism; Fatty acid metabolism [PATH:ko00071] Metabolism; Amino Acid Metabolism; Tyrosine metabolism [PATH:ko00350] Metabolism; Metabolism of Cofactors and Vitamins; Retinol metabolism [PATH:ko00830] Metabolism; Xenobiotics Biodegradation and Met…	COG0604 NADPH:quinone reductase and related Zn-dependent oxidoreductases CR Energy production and conversion ; General function prediction only ;	YGD6_SCHPO Zinc-type alcohol dehydrogenase-like protein C1773.06c OS=Schizosaccharomyces pombe GN=SPBC1773.06c PE=2 SV=1	B8PC22_POSPM Predicted protein OS=Postia placenta (strain ATCC 44394 / Madison 698-R) GN=POSPLDRAFT_105379 PE=4 SV=1	predicted protein [Postia placenta Mad-698-R]	IPR002085; Alcohol dehydrogenase superfamily, zinc-containing IPR011032; GroES-like IPR013149; Alcohol dehydrogenase, C-terminal IPR013154; Alcohol dehydrogenase GroES-like IPR016040; NAD(P)-binding domain IPR020843; Polyketide synthase, enoylreductase	GO:0003824; catalytic activity; Molecular Function GO:0005488; binding; Molecular Function GO:0008152; metabolic process; Biological Process GO:0008270; zinc ion binding; Molecular Function GO:0016491; oxidoreductase activity; Molecular Function GO:0016747; transferase activity, transferring acyl groups other than amino-acyl groups; Molecular Function GO:0055114; oxidation-reduction process; Biol…
G_lucidum_10007921	PF07690.10;	K08189 SLC16A13 MFS transporter, MCP family, solute carrier family 16 (monocarboxylic acid transporters), member 13 -- Environmental Information Processing; Membrane Transport; Transporters [BR:ko02000]	NA	MCH5_YEAST Riboflavin transporter MCH5 OS=Saccharomyces cerevisiae GN=MCH5 PE=1 SV=1	B8PKL6_POSPM Predicted protein OS=Postia placenta (strain ATCC 44394 / Madison 698-R) GN=POSPLDRAFT_104336 PE=4 SV=1	predicted protein [Postia placenta Mad-698-R]	IPR011701; Major facilitator superfamily MFS-1 IPR016196; Major facilitator superfamily, general substrate transporter IPR020846; Major facilitator superfamily	GO:0055085; transmembrane transport; Biological Process
G_lucidum_10007922	PF02096.14;	K03217 yidC, spoIIIJ, OXA1 preprotein translocase subunit YidC -- Genetic Information Processing; Folding, Sorting and Degradation; Protein export [PATH:ko03060] Environmental Information Processing; Membrane Transport; Bacterial secretion system [PATH:ko03070] Environmental Information Processing; Membrane Transport; Secretion system [BR:ko02044]	COG0706 Preprotein translocase subunit YidC U Intracellular trafficking, secretion, and vesicular transport ;	OXA1L_MOUSE Mitochondrial inner membrane protein OXA1L OS=Mus musculus GN=Oxa1l PE=2 SV=1	A8NIM1_COPC7 Inner membrane protein OXA1L OS=Coprinopsis cinerea (strain Okayama-7 / 130 / FGSC 9003) GN=CC1G_09443 PE=3 SV=1	inner membrane protein OXA1L [Coprinopsis cinerea okayama7#130]	IPR001708; Membrane insertion protein, OxaA/YidC	GO:0016021; integral to membrane; Cellular Component GO:0051205; protein insertion into membrane; Biological Process
G_lucidum_10007923	NA	NA	NA	NA	B0D787_LACBS Predicted protein OS=Laccaria bicolor (strain S238N-H82) GN=LACBIDRAFT_318847 PE=4 SV=1	predicted protein [Laccaria bicolor S238N-H82]	NA	NA
G_lucidum_10007924	NA	NA	NA	NA	B8P4Y3_POSPM Predicted protein OS=Postia placenta (strain ATCC 44394 / Madison 698-R) GN=POSPLDRAFT_106333 PE=4 SV=1	predicted protein [Postia placenta Mad-698-R]	NA	NA
G_lucidum_10007925	PF08240.6;PF00107.20;	K00001 E1.1.1.1, adh alcohol dehydrogenase 1.1.1.1 Metabolism; Carbohydrate Metabolism; Glycolysis / Gluconeogenesis [PATH:ko00010] Metabolism; Lipid Metabolism; Fatty acid metabolism [PATH:ko00071] Metabolism; Amino Acid Metabolism; Tyrosine metabolism [PATH:ko00350] Metabolism; Metabolism of Cofactors and Vitamins; Retinol metabolism [PATH:ko00830] Metabolism; Xenobiotics Biodegradation and Met…	COG0604 NADPH:quinone reductase and related Zn-dependent oxidoreductases CR Energy production and conversion ; General function prediction only ;	YGD6_SCHPO Zinc-type alcohol dehydrogenase-like protein C1773.06c OS=Schizosaccharomyces pombe GN=SPBC1773.06c PE=2 SV=1	B8PC22_POSPM Predicted protein OS=Postia placenta (strain ATCC 44394 / Madison 698-R) GN=POSPLDRAFT_105379 PE=4 SV=1	predicted protein [Postia placenta Mad-698-R]	IPR002085; Alcohol dehydrogenase superfamily, zinc-containing IPR011032; GroES-like IPR013149; Alcohol dehydrogenase, C-terminal IPR013154; Alcohol dehydrogenase GroES-like IPR016040; NAD(P)-binding domain IPR020843; Polyketide synthase, enoylreductase	GO:0003824; catalytic activity; Molecular Function GO:0005488; binding; Molecular Function GO:0008152; metabolic process; Biological Process GO:0008270; zinc ion binding; Molecular Function GO:0016491; oxidoreductase activity; Molecular Function GO:0016747; transferase activity, transferring acyl groups other than amino-acyl groups; Molecular Function GO:0055114; oxidation-reduction process; Biol…
G_lucidum_10007926	PF00999.15;	K03316 TC.CPA1 monovalent cation:H+ antiporter, CPA1 family -- Unclassified; Cellular Processes and Signaling; Other ion-coupled transporters	COG0025 NhaP-type Na+/H+ and K+/H+ antiporters P Inorganic ion transport and metabolism ;	NHX1_YEAST Endosomal/prevacuolar sodium/hydrogen exchanger OS=Saccharomyces cerevisiae GN=NHX1 PE=1 SV=1	D8QG31_SCHCO Sodium/hydrogen exchanger OS=Schizophyllum commune H4-8 GN=SCHCODRAFT_79022 PE=3 SV=1	hypothetical protein SCHCODRAFT_79022 [Schizophyllum commune H4-8]	IPR004709; Na+/H+ exchanger IPR006153; Cation/H+ exchanger IPR018408; Na+/H+ exchanger, isoform 6/7/9 IPR018422; Cation/H+ exchanger, CPA1 family	GO:0006812; cation transport; Biological Process GO:0006814; sodium ion transport; Biological Process GO:0006885; regulation of pH; Biological Process GO:0015299; solute:hydrogen antiporter activity; Molecular Function GO:0015385; sodium:hydrogen antiporter activity; Molecular Function GO:0016021; integral to membrane; Cellular Component GO:0055085; transmembrane transport; Biological Process
G_lucidum_10007927	PF07690.10;	K08177 oxlT MFS transporter, OFA family, oxalate/formate antiporter -- Environmental Information Processing; Membrane Transport; Transporters [BR:ko02000]	NA	MCH5_YEAST Riboflavin transporter MCH5 OS=Saccharomyces cerevisiae GN=MCH5 PE=1 SV=1	B8PKL6_POSPM Predicted protein OS=Postia placenta (strain ATCC 44394 / Madison 698-R) GN=POSPLDRAFT_104336 PE=4 SV=1	predicted protein [Postia placenta Mad-698-R]	IPR011701; Major facilitator superfamily MFS-1 IPR016196; Major facilitator superfamily, general substrate transporter IPR020846; Major facilitator superfamily	GO:0055085; transmembrane transport; Biological Process
G_lucidum_10007928	NA	NA	NA	NA	NA	NA	NA	NA
G_lucidum_10007929	NA	K01238 E3.2.1.- -- -- Unclassified; Metabolism; Others	NA	YHZ7_SCHPO Probable glycosidase C21B10.07 OS=Schizosaccharomyces pombe GN=SPBC21B10.07 PE=2 SV=1	B8P4X5_POSPM Putative uncharacterized protein OS=Postia placenta (strain ATCC 44394 / Madison 698-R) GN=POSPLDRAFT_116903 PE=4 SV=1	hypothetical protein POSPLDRAFT_116903 [Postia placenta Mad-698-R]	IPR008985; Concanavalin A-like lectin/glucanase IPR013320; Concanavalin A-like lectin/glucanase, subgroup	NA
G_lucidum_10007930	PF00722.15;	K01238 E3.2.1.- -- -- Unclassified; Metabolism; Others	NA	EGLX_ASPFU Probable endo-1,3(4)-beta-glucanase AFUA_2G14360 OS=Aspergillus fumigatus GN=AFUA_2G14360 PE=3 SV=1	D8QEF5_SCHCO Glycoside hydrolase family 16 protein OS=Schizophyllum commune H4-8 GN=SCHCODRAFT_258280 PE=4 SV=1	glycoside hydrolase family 16 protein [Schizophyllum commune H4-8]	IPR000757; Glycoside hydrolase, family 16 IPR008985; Concanavalin A-like lectin/glucanase IPR013320; Concanavalin A-like lectin/glucanase, subgroup	GO:0004553; hydrolase activity, hydrolyzing O-glycosyl compounds; Molecular Function GO:0005975; carbohydrate metabolic process; Biological Process
G_lucidum_10007931	NA	K06792 AGC1, CSPG1 aggrecan 1 -- Metabolism; Glycan Biosynthesis and Metabolism; Proteoglycans [BR:ko00535] Environmental Information Processing; Signaling Molecules and Interaction; Cell adhesion molecules (CAMs) [BR:ko04515] Environmental Information Processing; Signaling Molecules and Interaction; Glycan bindng proteins [BR:ko04091]	NA	PGCA_CHICK Aggrecan core protein OS=Gallus gallus GN=ACAN PE=1 SV=2	A2EAZ3_TRIVA PT repeat family protein OS=Trichomonas vaginalis GN=TVAG_088480 PE=4 SV=1	PT repeat family protein [Trichomonas vaginalis G3]	NA	NA
G_lucidum_10007932	PF00383.1;	NA	NA	NA	A4QWI4_MAGGR Putative uncharacterized protein OS=Magnaporthe grisea GN=MGG_05987 PE=4 SV=1	conserved hypothetical protein [Magnaporthe oryzae 70-15]	IPR002125; CMP/dCMP deaminase, zinc-binding IPR016193; Cytidine deaminase-like	GO:0003824; catalytic activity; Molecular Function GO:0008270; zinc ion binding; Molecular Function GO:0016787; hydrolase activity; Molecular Function
G_lucidum_10007933	PF00736.13;PF10587.3;	K03232 eEF-1B, ef1B elongation factor EF-1 beta subunit -- Genetic Information Processing; Translation; Translation factors [BR:ko03012]	COG2092 Translation elongation factor EF-1beta J Translation, ribosomal structure and biogenesis ;	EF1B_XENLA Elongation factor 1-beta OS=Xenopus laevis GN=eef1b PE=1 SV=3	B0D784_LACBS Predicted protein OS=Laccaria bicolor (strain S238N-H82) GN=LACBIDRAFT_318844 PE=3 SV=1	predicted protein [Laccaria bicolor S238N-H82]	IPR001326; Translation elongation factor EF1B, beta/delta chains, conserved site IPR010987; Glutathione S-transferase, C-terminal-like IPR014038; Translation elongation factor EF1B, beta/delta subunit, guanine nucleotide exchange IPR014717; Translation elongation factor EF1B/ribosomal protein S6 IPR018940; Elongation factor 1 beta central acidic region, eukaryote	GO:0003746; translation elongation factor activity; Molecular Function GO:0005853; eukaryotic translation elongation factor 1 complex; Cellular Component GO:0006414; translational elongation; Biological Process
G_lucidum_10007934	PF00400.26;	K03363 CDC20 cell division cycle 20, cofactor of APC complex -- Genetic Information Processing; Folding, Sorting and Degradation; Ubiquitin mediated proteolysis [PATH:ko04120] Genetic Information Processing; Folding, Sorting and Degradation; Ubiquitin system [BR:ko04121] Genetic Information Processing; Replication and Repair; Chromosome [BR:ko03036] Cellular Processes; Cell Growth and Death; Cell…	NA	CDC20_MOUSE Cell division cycle protein 20 homolog OS=Mus musculus GN=Cdc20 PE=1 SV=2	A8NIH8_COPC7 Cell division cycle 20 family protein OS=Coprinopsis cinerea (strain Okayama-7 / 130 / FGSC 9003) GN=CC1G_09412 PE=4 SV=2	cell division cycle 20 family protein [Coprinopsis cinerea okayama7#130]	IPR001680; WD40 repeat IPR011046; WD40 repeat-like-containing domain IPR015943; WD40/YVTN repeat-like-containing domain IPR017986; WD40-repeat-containing domain IPR019775; WD40 repeat, conserved site IPR019781; WD40 repeat, subgroup IPR019782; WD40 repeat 2	GO:0005515; protein binding; Molecular Function
G_lucidum_10007935	NA	NA	NA	NA	C8PBG6_9LACO Putative uncharacterized protein OS=Lactobacillus iners DSM 13335 GN=HMPREF0520_0436 PE=4 SV=1	alpha-galactosidase [Lactobacillus iners AB-1]	NA	NA
G_lucidum_10007936	NA	NA	NA	NA	A8N855_COPC7 Putative uncharacterized protein OS=Coprinopsis cinerea (strain Okayama-7 / 130 / FGSC 9003) GN=CC1G_09276 PE=4 SV=1	hypothetical protein CC1G_09276 [Coprinopsis cinerea okayama7#130]	NA	NA
G_lucidum_10007937	NA	K01238 E3.2.1.- -- -- Unclassified; Metabolism; Others	NA	EGLX_NEOFI Probable endo-1,3(4)-beta-glucanase NFIA_089530 OS=Neosartorya fischeri (strain ATCC 1020 / DSM 3700 / FGSC A1164 / NRRL 181) GN=NFIA_089530 PE=3 SV=1	B8P4X5_POSPM Putative uncharacterized protein OS=Postia placenta (strain ATCC 44394 / Madison 698-R) GN=POSPLDRAFT_116903 PE=4 SV=1	hypothetical protein POSPLDRAFT_116903 [Postia placenta Mad-698-R]	IPR008985; Concanavalin A-like lectin/glucanase IPR013320; Concanavalin A-like lectin/glucanase, subgroup	NA
G_lucidum_10007938	PF00010.20;	K09104 K09104 bHLH factor, other -- Genetic Information Processing; Transcription; Transcription factors [BR:ko03000]	NA	CBF1_YEAST Centromere-binding protein 1 OS=Saccharomyces cerevisiae GN=CBF1 PE=1 SV=2	B8P4X4_POSPM Predicted protein OS=Postia placenta (strain ATCC 44394 / Madison 698-R) GN=POSPLDRAFT_106321 PE=4 SV=1	predicted protein [Postia placenta Mad-698-R]	IPR001092; Helix-loop-helix DNA-binding domain IPR011598; Helix-loop-helix DNA-binding	GO:0005634; nucleus; Cellular Component GO:0030528; transcription regulator activity; Molecular Function GO:0045449; regulation of transcription; Biological Process
G_lucidum_10007939	PF00503.14;	K04534 GNAO, G-ALPHA-O guanine nucleotide binding protein (G protein), alpha o polypeptide -- Environmental Information Processing; Signaling Molecules and Interaction; GTP-binding proteins [BR:ko04031] Organismal Systems; Endocrine System; Melanogenesis [PATH:ko04916] Organismal Systems; Nervous System; Long-term depression [PATH:ko04730] Human Diseases; Infectious Diseases; Chagas disease [PATH…	NA	GPA4_USTMA Guanine nucleotide-binding protein alpha-4 subunit OS=Ustilago maydis GN=GPA4 PE=3 SV=1	B8PCB6_POSPM Candidate G-protein alpha subunit OS=Postia placenta (strain ATCC 44394 / Madison 698-R) GN=POSPLDRAFT_126171 PE=4 SV=1	candidate G-protein alpha subunit [Postia placenta Mad-698-R]	IPR001019; Guanine nucleotide binding protein (G-protein), alpha subunit IPR011025; G protein alpha subunit, helical insertion	GO:0004871; signal transducer activity; Molecular Function GO:0007165; signal transduction; Biological Process GO:0007186; G-protein coupled receptor protein signaling pathway; Biological Process GO:0019001; guanyl nucleotide binding; Molecular Function
G_lucidum_10007940	PF07690.10;	K08187 SLC16A10 MFS transporter, MCP family, solute carrier family 16 (monocarboxylic acid transporters), member 10 -- Environmental Information Processing; Membrane Transport; Transporters [BR:ko02000]	NA	ESBP6_YEAST Uncharacterized transporter ESBP6 OS=Saccharomyces cerevisiae GN=ESBP6 PE=1 SV=1	B8PKL6_POSPM Predicted protein OS=Postia placenta (strain ATCC 44394 / Madison 698-R) GN=POSPLDRAFT_104336 PE=4 SV=1	predicted protein [Postia placenta Mad-698-R]	IPR011701; Major facilitator superfamily MFS-1 IPR016196; Major facilitator superfamily, general substrate transporter IPR020846; Major facilitator superfamily	GO:0055085; transmembrane transport; Biological Process
G_lucidum_10007941	PF12537.2;PF12430.2;	NA	NA	GPHR_CRIGR Golgi pH regulator OS=Cricetulus griseus GN=GPR89 PE=2 SV=1	B0D7Z7_LACBS G protein-coupled receptor 89 OS=Laccaria bicolor (strain S238N-H82) GN=LACBIDRAFT_319151 PE=4 SV=1	G protein-coupled receptor 89 [Laccaria bicolor S238N-H82]	IPR015672; GPCR 89-related IPR022535; Golgi pH regulator, conserved domain	NA
G_lucidum_10007942	NA	NA	NA	NA	B0DWT0_LACBS Predicted protein OS=Laccaria bicolor (strain S238N-H82) GN=LACBIDRAFT_295648 PE=4 SV=1	predicted protein [Laccaria bicolor S238N-H82]	NA	NA
G_lucidum_10007943	PF00856.22;	K07117 K07117 -- -- Unclassified; Poorly Characterized; General function prediction only	COG2940 Proteins containing SET domain R General function prediction only ;	SET5_CRYNE Potential protein lysine methyltransferase SET5 OS=Cryptococcus neoformans GN=SET5 PE=3 SV=1	B0D7F2_LACBS Predicted protein OS=Laccaria bicolor (strain S238N-H82) GN=LACBIDRAFT_318916 PE=4 SV=1	predicted protein [Laccaria bicolor S238N-H82]	IPR001214; SET domain	GO:0005515; protein binding; Molecular Function
G_lucidum_10007944	NA	K10768 ALKBH6 alkylated DNA repair protein alkB homolog 6 -- Unclassified; Genetic Information Processing; Replication, recombination and repair proteins	NA	ALKB6_XENLA Probable alpha-ketoglutarate-dependent dioxygenase ABH6 OS=Xenopus laevis GN=alkbh6 PE=2 SV=1	D8QGC5_SCHCO Putative uncharacterized protein OS=Schizophyllum commune H4-8 GN=SCHCODRAFT_60636 PE=3 SV=1	hypothetical protein SCHCODRAFT_60636 [Schizophyllum commune H4-8]	NA	NA
G_lucidum_10007945	PF02179.10;	NA	NA	NA	B8PNB8_POSPM Predicted protein (Fragment) OS=Postia placenta (strain ATCC 44394 / Madison 698-R) GN=POSPLDRAFT_92663 PE=4 SV=1	predicted protein [Postia placenta Mad-698-R]	IPR003103; Apoptosis regulator, Bcl-2 protein, BAG	GO:0006915; apoptosis; Biological Process
G_lucidum_10007946	PF00190.16;	K01569 oxdD oxalate decarboxylase 4.1.1.2 Metabolism; Carbohydrate Metabolism; Glyoxylate and dicarboxylate metabolism [PATH:ko00630]	COG2140 Thermophilic glucose-6-phosphate isomerase and related metalloenzymes GR Carbohydrate transport and metabolism ; General function prediction only ;	OXDC_BACSU Oxalate decarboxylase oxdC OS=Bacillus subtilis GN=oxdC PE=1 SV=1	B8NWS9_ASPFN Oxalate decarboxylase oxdC, putative OS=Aspergillus flavus (strain ATCC 200026 / FGSC A1120 / NRRL 3357 / JCM 12722 / SRRC 167) GN=AFLA_121160 PE=4 SV=1	oxalate decarboxylase oxdD [Arthroderma gypseum CBS 118893]	IPR006045; Cupin 1 IPR011051; Cupin, RmlC-type IPR014710; RmlC-like jelly roll fold IPR017774; Bicupin, oxalate decarboxylase/oxidase	GO:0045735; nutrient reservoir activity; Molecular Function
G_lucidum_10007947	PF00043.19;PF00647.13;PF02798.14;	K03233 eEF-1G, ef1G elongation factor EF-1 gamma subunit -- Genetic Information Processing; Translation; Translation factors [BR:ko03012]	COG0625 Glutathione S-transferase O Posttranslational modification, protein turnover, chaperones ;	EF1G_RAT Elongation factor 1-gamma OS=Rattus norvegicus GN=Eef1g PE=1 SV=3	B0D7Z6_LACBS Predicted protein (Fragment) OS=Laccaria bicolor (strain S238N-H82) GN=LACBIDRAFT_248920 PE=4 SV=1	predicted protein [Laccaria bicolor S238N-H82]	IPR001662; Translation elongation factor EF1B, gamma chain, conserved IPR004045; Glutathione S-transferase, N-terminal IPR004046; Glutathione S-transferase, C-terminal IPR010987; Glutathione S-transferase, C-terminal-like IPR012335; Thioredoxin fold IPR012336; Thioredoxin-like fold IPR017933; Glutathione S-transferase/chloride channel, C-terminal	GO:0003746; translation elongation factor activity; Molecular Function GO:0005515; protein binding; Molecular Function GO:0005853; eukaryotic translation elongation factor 1 complex; Cellular Component GO:0006414; translational elongation; Biological Process
G_lucidum_10007948	PF01529.14;PF12796.1;PF00023.24;	K00680 E2.3.1.- -- -- Metabolism; Amino Acid Metabolism; Tyrosine metabolism [PATH:ko00350] Metabolism; Metabolism of Terpenoids and Polyketides; Limonene and pinene degradation [PATH:ko00903] Metabolism; Xenobiotics Biodegradation and Metabolism; Ethylbenzene degradation [PATH:ko00642] Metabolism; Xenobiotics Biodegradation and Metabolism; Benzoate degradation via CoA ligation [PATH:ko00632] Met…	COG0666 FOG: Ankyrin repeat R General function prediction only ;	AKR1_USTMA Palmitoyltransferase AKR1 OS=Ustilago maydis GN=AKR1 PE=3 SV=1	A8NI74_COPC7 Palmitoyltransferase AKR1 OS=Coprinopsis cinerea (strain Okayama-7 / 130 / FGSC 9003) GN=CC1G_01603 PE=4 SV=2	palmitoyltransferase AKR1 [Coprinopsis cinerea okayama7#130]	IPR001594; Zinc finger, DHHC-type, palmitoyltransferase IPR002110; Ankyrin repeat IPR020683; Ankyrin repeat-containing domain	GO:0005515; protein binding; Molecular Function GO:0008270; zinc ion binding; Molecular Function
G_lucidum_10007949	NA	NA	NA	NA	B8PNB8_POSPM Predicted protein (Fragment) OS=Postia placenta (strain ATCC 44394 / Madison 698-R) GN=POSPLDRAFT_92663 PE=4 SV=1	predicted protein [Postia placenta Mad-698-R]	IPR003103; Apoptosis regulator, Bcl-2 protein, BAG	GO:0006915; apoptosis; Biological Process
G_lucidum_10007950	PF10342.3;	NA	NA	NA	Q00GA7_LENED Mitochondrial developmentally regulated MAPK-interacting protein (Fragment) OS=Lentinula edodes GN=DRMIP PE=2 SV=1	mitochondrial developmentally regulated MAPK-interacting protein [Lentinula edodes]	IPR018466; Cell wall beta-glucan synthesis	NA
G_lucidum_10007951	NA	NA	NA	NA	B0E204_LACBS Predicted protein OS=Laccaria bicolor (strain S238N-H82) GN=LACBIDRAFT_296025 PE=4 SV=1	predicted protein [Laccaria bicolor S238N-H82]	NA	NA
G_lucidum_10007952	PF00724.14;	K00354 E1.6.99.1 NADPH2 dehydrogenase 1.6.99.1 Unclassified; Metabolism; Energy metabolism	COG1902 NADH:flavin oxidoreductases, Old Yellow Enzyme family C Energy production and conversion ;	OYEB_SCHPO Putative NADPH dehydrogenase C5H10.10 OS=Schizosaccharomyces pombe GN=SPAC5H10.10 PE=2 SV=1	D8QJL6_SCHCO Putative uncharacterized protein OS=Schizophyllum commune H4-8 GN=SCHCODRAFT_83521 PE=4 SV=1	hypothetical protein SCHCODRAFT_83521 [Schizophyllum commune H4-8]	IPR001155; NADH:flavin oxidoreductase/NADH oxidase, N-terminal IPR013785; Aldolase-type TIM barrel	GO:0003824; catalytic activity; Molecular Function GO:0008152; metabolic process; Biological Process GO:0010181; FMN binding; Molecular Function GO:0016491; oxidoreductase activity; Molecular Function
G_lucidum_10007953	NA	NA	NA	NA	B8PHG1_POSPM Predicted protein OS=Postia placenta (strain ATCC 44394 / Madison 698-R) GN=POSPLDRAFT_105586 PE=4 SV=1	predicted protein [Postia placenta Mad-698-R]	NA	NA
G_lucidum_10007954	NA	NA	NA	NA	B0CRB9_LACBS Predicted protein OS=Laccaria bicolor (strain S238N-H82) GN=LACBIDRAFT_301101 PE=4 SV=1	predicted protein [Laccaria bicolor S238N-H82]	NA	NA
G_lucidum_10007955	NA	NA	NA	NA	B8PE14_POSPM Predicted protein OS=Postia placenta (strain ATCC 44394 / Madison 698-R) GN=POSPLDRAFT_106638 PE=4 SV=1	predicted protein [Postia placenta Mad-698-R]	NA	NA
G_lucidum_10007956	PF12824.1;	NA	NA	RM20_SCHPO 60S ribosomal protein L20, mitochondrial OS=Schizosaccharomyces pombe GN=mrpl20 PE=2 SV=1	B0CVW7_LACBS Predicted protein OS=Laccaria bicolor (strain S238N-H82) GN=LACBIDRAFT_309237 PE=4 SV=1	predicted protein [Laccaria bicolor S238N-H82]	NA	NA
G_lucidum_10007957	PF00702.1;PF00122.14;	K01530 E3.6.3.1 phospholipid-translocating ATPase 3.6.3.1 Unclassified; Metabolism; Energy metabolism	NA	ATP9B_BOVIN Probable phospholipid-transporting ATPase IIB OS=Bos taurus GN=ATP9B PE=2 SV=1	B0DWL6_LACBS Aminophospholipid-transporting P-type ATPase OS=Laccaria bicolor (strain S238N-H82) GN=LACBIDRAFT_255013 PE=4 SV=1	aminophospholipid-transporting P-type ATPase [Laccaria bicolor S238N-H82]	IPR001757; ATPase, P-type, K/Mg/Cd/Cu/Zn/Na/Ca/Na/H-transporter IPR005834; Haloacid dehalogenase-like hydrolase IPR006539; ATPase, P-type, phospholipid-translocating, flippase IPR008250; ATPase, P-type, ATPase-associated domain IPR018303; ATPase, P-type phosphorylation site IPR023214; HAD-like domain IPR023299; ATPase, P-type, cytoplasmic domain N IPR023300; ATPase, P-type, cytoplasmic transducti…	GO:0000287; magnesium ion binding; Molecular Function GO:0003824; catalytic activity; Molecular Function GO:0004012; phospholipid-translocating ATPase activity; Molecular Function GO:0005524; ATP binding; Molecular Function GO:0006754; ATP biosynthetic process; Biological Process GO:0008152; metabolic process; Biological Process GO:0015662; ATPase activity, coupled to transmembrane movement of io…
G_lucidum_10007958	NA	K13849 RBP reticulocyte-binding protein -- Human Diseases; Infectious Diseases; Malaria [PATH:ko05144]	NA	NST1_ASPNC Stress response protein nst1 OS=Aspergillus niger (strain CBS 513.88 / FGSC A1513) GN=nst1 PE=3 SV=1	B0D7U9_LACBS Predicted protein OS=Laccaria bicolor (strain S238N-H82) GN=LACBIDRAFT_319090 PE=4 SV=1	predicted protein [Laccaria bicolor S238N-H82]	NA	NA
G_lucidum_10007959	NA	NA	NA	NA	B0D764_LACBS Glycoside hydrolase family 79 protein OS=Laccaria bicolor (strain S238N-H82) GN=LACBIDRAFT_234055 PE=4 SV=1	glycoside hydrolase family 79 protein [Laccaria bicolor S238N-H82]	IPR017853; Glycoside hydrolase, catalytic core	NA
G_lucidum_10007960	NA	NA	NA	NA	B0D764_LACBS Glycoside hydrolase family 79 protein OS=Laccaria bicolor (strain S238N-H82) GN=LACBIDRAFT_234055 PE=4 SV=1	glycoside hydrolase family 79 protein [Laccaria bicolor S238N-H82]	IPR017853; Glycoside hydrolase, catalytic core	NA
G_lucidum_10007961	NA	NA	NA	NA	A8NIB3_COPC7 Putative uncharacterized protein OS=Coprinopsis cinerea (strain Okayama-7 / 130 / FGSC 9003) GN=CC1G_01634 PE=4 SV=2	hypothetical protein CC1G_01634 [Coprinopsis cinerea okayama7#130]	IPR017853; Glycoside hydrolase, catalytic core	NA
G_lucidum_10007962	NA	NA	NA	NA	B8PE14_POSPM Predicted protein OS=Postia placenta (strain ATCC 44394 / Madison 698-R) GN=POSPLDRAFT_106638 PE=4 SV=1	predicted protein [Postia placenta Mad-698-R]	NA	NA
G_lucidum_10007963	NA	NA	NA	NA	NA	NA	NA	NA
G_lucidum_10007964	NA	NA	NA	NA	NA	NA	NA	NA
G_lucidum_10007965	NA	NA	NA	NA	A8NIB3_COPC7 Putative uncharacterized protein OS=Coprinopsis cinerea (strain Okayama-7 / 130 / FGSC 9003) GN=CC1G_01634 PE=4 SV=2	hypothetical protein CC1G_01634 [Coprinopsis cinerea okayama7#130]	IPR017853; Glycoside hydrolase, catalytic core	NA
G_lucidum_10007966	NA	NA	NA	NA	B8PAS9_POSPM Predicted protein OS=Postia placenta (strain ATCC 44394 / Madison 698-R) GN=POSPLDRAFT_104491 PE=4 SV=1	predicted protein [Postia placenta Mad-698-R]	IPR013781; Glycoside hydrolase, subgroup, catalytic core IPR017853; Glycoside hydrolase, catalytic core	GO:0003824; catalytic activity; Molecular Function GO:0005975; carbohydrate metabolic process; Biological Process GO:0043169; cation binding; Molecular Function
G_lucidum_10007967	NA	NA	NA	NA	NA	NA	NA	NA
G_lucidum_10007968	NA	NA	NA	NA	NA	NA	NA	NA
G_lucidum_10003794	PF00930.15;	K01282 E3.4.14.- dipeptidyl aminopeptidase 3.4.14.- Unclassified; Metabolism; Amino acid metabolism	COG0542 ATPases with chaperone activity, ATP-binding subunit O Posttranslational modification, protein turnover, chaperones ;	NA	B8P5R9_POSPM Candidate dipeptidyl aminopeptidase OS=Postia placenta (strain ATCC 44394 / Madison 698-R) GN=POSPLDRAFT_43125 PE=4 SV=1	candidate dipeptidyl aminopeptidase [Postia placenta Mad-698-R]	IPR002469; Peptidase S9B, dipeptidylpeptidase IV N-terminal	GO:0006508; proteolysis; Biological Process GO:0016020; membrane; Cellular Component
G_lucidum_10003795	NA	NA	NA	NA	B8PPS7_POSPM Predicted protein (Fragment) OS=Postia placenta (strain ATCC 44394 / Madison 698-R) GN=POSPLDRAFT_28441 PE=4 SV=1	predicted protein [Postia placenta Mad-698-R]	IPR014044; CAP domain	NA
G_lucidum_10003796	NA	NA	NA	NA	NA	NA	NA	NA
G_lucidum_10003797	PF00067.16;	K00517 E1.14.-.- -- -- Metabolism; Metabolism of Terpenoids and Polyketides; Limonene and pinene degradation [PATH:ko00903] Metabolism; Biosynthesis of Other Secondary Metabolites; Stilbenoid, diarylheptanoid and gingerol biosynthesis [PATH:ko00945] Metabolism; Xenobiotics Biodegradation and Metabolism; gamma-Hexachlorocyclohexane degradation [PATH:ko00361] Metabolism; Xenobiotics Biodegradation …	COG2124 Cytochrome P450 Q Secondary metabolites biosynthesis, transport and catabolism ;	KO1_GIBFU Ent-kaurene oxidase OS=Gibberella fujikuroi GN=CYP503A1 PE=1 SV=1	Q96WQ4_TRAVE Cytochrome P450 OS=Trametes versicolor GN=CYP512A1 PE=2 SV=1	cytochrome P450 [Trametes versicolor]	IPR001128; Cytochrome P450 IPR002403; Cytochrome P450, E-class, group IV IPR017972; Cytochrome P450, conserved site	GO:0004497; monooxygenase activity; Molecular Function GO:0005506; iron ion binding; Molecular Function GO:0009055; electron carrier activity; Molecular Function GO:0020037; heme binding; Molecular Function
G_lucidum_10003798	NA	NA	NA	NA	NA	NA	NA	NA
G_lucidum_10003799	PF09801.3;	NA	NA	NA	B8P5R8_POSPM Predicted protein OS=Postia placenta (strain ATCC 44394 / Madison 698-R) GN=POSPLDRAFT_87576 PE=4 SV=1	predicted protein [Postia placenta Mad-698-R]	IPR019185; Integral membrane protein SYS1-related	NA
G_lucidum_10003800	PF08740.5;PF00004.23;	K08900 BCS1 mitochondrial chaperone BCS1 -- Unclassified; Genetic Information Processing; Others	COG0465 ATP-dependent Zn proteases O Posttranslational modification, protein turnover, chaperones ;	BCS1B_DICDI Probable mitochondrial chaperone BCS1-B OS=Dictyostelium discoideum GN=bcsl1b PE=3 SV=1	B0CT87_LACBS Predicted protein OS=Laccaria bicolor (strain S238N-H82) GN=LACBIDRAFT_291958 PE=3 SV=1	predicted protein [Laccaria bicolor S238N-H82]	IPR003593; ATPase, AAA+ type, core IPR003959; ATPase, AAA-type, core IPR003960; ATPase, AAA-type, conserved site IPR014851; BCS1, N-terminal	GO:0000166; nucleotide binding; Molecular Function GO:0005524; ATP binding; Molecular Function GO:0017111; nucleoside-triphosphatase activity; Molecular Function
G_lucidum_10003801	NA	K08900 BCS1 mitochondrial chaperone BCS1 -- Unclassified; Genetic Information Processing; Others	NA	NA	A8N8G3_COPC7 Putative uncharacterized protein OS=Coprinopsis cinerea (strain Okayama-7 / 130 / FGSC 9003) GN=CC1G_04010 PE=3 SV=2	hypothetical protein CC1G_04010 [Coprinopsis cinerea okayama7#130]	NA	NA
G_lucidum_10003802	PF00350.17;PF02212.12;PF01031.14;	K01528 E3.6.5.5 dynamin GTPase 3.6.5.5 Cellular Processes; Transport and Catabolism; Endocytosis [PATH:ko04144] Organismal Systems; Immune System; Fc gamma R-mediated phagocytosis [PATH:ko04666] Human Diseases; Infectious Diseases; Bacterial invasion of epithelial cells [PATH:ko05100]	COG0699 Predicted GTPases (dynamin-related) R General function prediction only ;	DNM1_YEAST Dynamin-related protein DNM1 OS=Saccharomyces cerevisiae GN=DNM1 PE=1 SV=1	B0CT88_LACBS Predicted protein OS=Laccaria bicolor (strain S238N-H82) GN=LACBIDRAFT_244551 PE=3 SV=1	predicted protein [Laccaria bicolor S238N-H82]	IPR000375; Dynamin central domain IPR001401; Dynamin, GTPase domain IPR003130; Dynamin GTPase effector IPR020850; GTPase effector domain, GED IPR022812; Dynamin	GO:0003924; GTPase activity; Molecular Function GO:0005525; GTP binding; Molecular Function
G_lucidum_10003803	NA	K01282 E3.4.14.- dipeptidyl aminopeptidase 3.4.14.- Unclassified; Metabolism; Amino acid metabolism	NA	NA	B8P5R9_POSPM Candidate dipeptidyl aminopeptidase OS=Postia placenta (strain ATCC 44394 / Madison 698-R) GN=POSPLDRAFT_43125 PE=4 SV=1	candidate dipeptidyl aminopeptidase [Postia placenta Mad-698-R]	NA	NA
G_lucidum_10003804	PF00930.15;	K01282 E3.4.14.- dipeptidyl aminopeptidase 3.4.14.- Unclassified; Metabolism; Amino acid metabolism	COG1506 Dipeptidyl aminopeptidases/acylaminoacyl-peptidases E Amino acid transport and metabolism ;	YEA8_SCHPO Putative dipeptidyl aminopeptidase C2E11.08 OS=Schizosaccharomyces pombe GN=SPACUNK4.08 PE=2 SV=1	B8PJI9_POSPM Candidate dipeptidyl aminopeptidase OS=Postia placenta (strain ATCC 44394 / Madison 698-R) GN=POSPLDRAFT_111724 PE=4 SV=1	candidate dipeptidyl aminopeptidase [Postia placenta Mad-698-R]	IPR002469; Peptidase S9B, dipeptidylpeptidase IV N-terminal	GO:0006508; proteolysis; Biological Process GO:0016020; membrane; Cellular Component
G_lucidum_10003805	NA	NA	NA	NA	B8PK04_POSPM Predicted protein OS=Postia placenta (strain ATCC 44394 / Madison 698-R) GN=POSPLDRAFT_92173 PE=4 SV=1	predicted protein [Postia placenta Mad-698-R]	NA	NA
G_lucidum_10003806	PF00350.17;	K01528 E3.6.5.5 dynamin GTPase 3.6.5.5 Cellular Processes; Transport and Catabolism; Endocytosis [PATH:ko04144] Organismal Systems; Immune System; Fc gamma R-mediated phagocytosis [PATH:ko04666] Human Diseases; Infectious Diseases; Bacterial invasion of epithelial cells [PATH:ko05100]	COG0699 Predicted GTPases (dynamin-related) R General function prediction only ;	DNM1L_DANRE Dynamin-1-like protein OS=Danio rerio GN=dnm1l PE=2 SV=1	B0CT88_LACBS Predicted protein OS=Laccaria bicolor (strain S238N-H82) GN=LACBIDRAFT_244551 PE=3 SV=1	predicted protein [Laccaria bicolor S238N-H82]	IPR001401; Dynamin, GTPase domain IPR022812; Dynamin	GO:0003924; GTPase activity; Molecular Function GO:0005525; GTP binding; Molecular Function
G_lucidum_10003807	PF00930.15;PF00326.1;	K01282 E3.4.14.- dipeptidyl aminopeptidase 3.4.14.- Unclassified; Metabolism; Amino acid metabolism	COG1506 Dipeptidyl aminopeptidases/acylaminoacyl-peptidases E Amino acid transport and metabolism ;	YEA8_SCHPO Putative dipeptidyl aminopeptidase C2E11.08 OS=Schizosaccharomyces pombe GN=SPACUNK4.08 PE=2 SV=1	B8PJI9_POSPM Candidate dipeptidyl aminopeptidase OS=Postia placenta (strain ATCC 44394 / Madison 698-R) GN=POSPLDRAFT_111724 PE=4 SV=1	candidate dipeptidyl aminopeptidase [Postia placenta Mad-698-R]	IPR001375; Peptidase S9, prolyl oligopeptidase, catalytic domain IPR002469; Peptidase S9B, dipeptidylpeptidase IV N-terminal IPR002471; Peptidase S9, serine active site	GO:0004252; serine-type endopeptidase activity; Molecular Function GO:0006508; proteolysis; Biological Process GO:0008236; serine-type peptidase activity; Molecular Function GO:0016020; membrane; Cellular Component
G_lucidum_10003808	PF09801.3;	NA	NA	NA	B8P5R8_POSPM Predicted protein OS=Postia placenta (strain ATCC 44394 / Madison 698-R) GN=POSPLDRAFT_87576 PE=4 SV=1	predicted protein [Postia placenta Mad-698-R]	IPR019185; Integral membrane protein SYS1-related	NA
G_lucidum_10003809	NA	NA	NA	NA	Q96WQ4_TRAVE Cytochrome P450 OS=Trametes versicolor GN=CYP512A1 PE=2 SV=1	cytochrome P450 [Trametes versicolor]	NA	NA
G_lucidum_10003810	PF00067.16;	K00517 E1.14.-.- -- -- Metabolism; Metabolism of Terpenoids and Polyketides; Limonene and pinene degradation [PATH:ko00903] Metabolism; Biosynthesis of Other Secondary Metabolites; Stilbenoid, diarylheptanoid and gingerol biosynthesis [PATH:ko00945] Metabolism; Xenobiotics Biodegradation and Metabolism; gamma-Hexachlorocyclohexane degradation [PATH:ko00361] Metabolism; Xenobiotics Biodegradation …	NA	KO1_GIBFU Ent-kaurene oxidase OS=Gibberella fujikuroi GN=CYP503A1 PE=1 SV=1	Q96WQ4_TRAVE Cytochrome P450 OS=Trametes versicolor GN=CYP512A1 PE=2 SV=1	cytochrome P450 [Trametes versicolor]	IPR001128; Cytochrome P450	GO:0004497; monooxygenase activity; Molecular Function GO:0005506; iron ion binding; Molecular Function GO:0009055; electron carrier activity; Molecular Function GO:0020037; heme binding; Molecular Function
G_lucidum_10003811	NA	NA	NA	NA	NA	NA	NA	NA
G_lucidum_10003812	PF01494.13;	NA	NA	TETX_BACFR Tetracycline resistance protein from transposon Tn4351/Tn4400 OS=Bacteroides fragilis GN=tetX PE=4 SV=1	D9VEV3_9ACTO Monooxygenase OS=Streptomyces sp. AA4 GN=SSMG_05905 PE=4 SV=1	monooxygenase [Streptomyces sp. AA4]	IPR002938; Monooxygenase, FAD-binding	GO:0004497; monooxygenase activity; Molecular Function GO:0055114; oxidation-reduction process; Biological Process
G_lucidum_10003813	PF00011.15;	K13993 HSP20 HSP20 family protein -- Genetic Information Processing; Folding, Sorting and Degradation; Chaperones and folding catalysts [BR:ko03110] Genetic Information Processing; Folding, Sorting and Degradation; Protein processing in endoplasmic reticulum [PATH:ko04141]	COG0071 Molecular chaperone (small heat shock protein) O Posttranslational modification, protein turnover, chaperones ;	HSPC4_RICFE Small heat shock protein C4 OS=Rickettsia felis GN=hspc4-1 PE=3 SV=1	A8N4X3_COPC7 Small heat shock protein OS=Coprinopsis cinerea (strain Okayama-7 / 130 / FGSC 9003) GN=CC1G_04673 PE=3 SV=1	small heat shock protein [Coprinopsis cinerea okayama7#130]	IPR002068; Heat shock protein Hsp20 IPR008978; HSP20-like chaperone	NA
G_lucidum_10003814	PF00498.20;PF00069.19;	K02831 RAD53 ser/thr/tyr protein kinase RAD53 2.7.11.- Genetic Information Processing; Replication and Repair; DNA repair and recombination proteins [BR:ko03400] Cellular Processes; Cell Growth and Death; Cell cycle - yeast [PATH:ko04111] Cellular Processes; Cell Growth and Death; Meiosis - yeast [PATH:ko04113]	NA	FHKC_DICDI Probable serine/threonine-protein kinase fhkC OS=Dictyostelium discoideum GN=fhkC PE=3 SV=2	B0D0E9_LACBS Predicted protein OS=Laccaria bicolor (strain S238N-H82) GN=LACBIDRAFT_293051 PE=4 SV=1	predicted protein [Laccaria bicolor S238N-H82]	IPR000253; Forkhead-associated (FHA) domain IPR000719; Protein kinase, catalytic domain IPR002290; Serine/threonine-protein kinase domain IPR008271; Serine/threonine-protein kinase, active site IPR008984; SMAD/FHA domain IPR011009; Protein kinase-like domain IPR017441; Protein kinase, ATP binding site IPR017442; Serine/threonine-protein kinase-like domain IPR020635; Tyrosine-protein kinase, catal…	GO:0004672; protein kinase activity; Molecular Function GO:0004674; protein serine/threonine kinase activity; Molecular Function GO:0005515; protein binding; Molecular Function GO:0005524; ATP binding; Molecular Function GO:0006468; protein phosphorylation; Biological Process
G_lucidum_10003815	PF00498.20;PF00069.19;	K06641 CHK2 serine/threonine-protein kinase Chk2 2.7.11.1 Metabolism; Enzyme Families; Protein kinases [BR:ko01001] Genetic Information Processing; Replication and Repair; DNA repair and recombination proteins [BR:ko03400] Cellular Processes; Cell Growth and Death; Cell cycle [PATH:ko04110] Cellular Processes; Cell Growth and Death; Cell cycle - yeast [PATH:ko04111] Cellular Processes; Cell Growt…	NA	FHKC_DICDI Probable serine/threonine-protein kinase fhkC OS=Dictyostelium discoideum GN=fhkC PE=3 SV=2	A8N5L4_COPC7 CAMK/RAD53 protein kinase OS=Coprinopsis cinerea (strain Okayama-7 / 130 / FGSC 9003) GN=CC1G_09319 PE=4 SV=1	CAMK/RAD53 protein kinase [Coprinopsis cinerea okayama7#130]	IPR000253; Forkhead-associated (FHA) domain IPR000719; Protein kinase, catalytic domain IPR002290; Serine/threonine-protein kinase domain IPR008271; Serine/threonine-protein kinase, active site IPR008984; SMAD/FHA domain IPR011009; Protein kinase-like domain IPR017441; Protein kinase, ATP binding site IPR017442; Serine/threonine-protein kinase-like domain IPR020635; Tyrosine-protein kinase, catal…	GO:0004672; protein kinase activity; Molecular Function GO:0004674; protein serine/threonine kinase activity; Molecular Function GO:0005515; protein binding; Molecular Function GO:0005524; ATP binding; Molecular Function GO:0006468; protein phosphorylation; Biological Process
G_lucidum_10003816	PF00011.15;	K13993 HSP20 HSP20 family protein -- Genetic Information Processing; Folding, Sorting and Degradation; Chaperones and folding catalysts [BR:ko03110] Genetic Information Processing; Folding, Sorting and Degradation; Protein processing in endoplasmic reticulum [PATH:ko04141]	COG0071 Molecular chaperone (small heat shock protein) O Posttranslational modification, protein turnover, chaperones ;	HSP16_SCHPO Heat shock protein 16 OS=Schizosaccharomyces pombe GN=hsp16 PE=2 SV=1	A8N4X3_COPC7 Small heat shock protein OS=Coprinopsis cinerea (strain Okayama-7 / 130 / FGSC 9003) GN=CC1G_04673 PE=3 SV=1	small heat shock protein [Coprinopsis cinerea okayama7#130]	IPR002068; Heat shock protein Hsp20 IPR008978; HSP20-like chaperone	NA
G_lucidum_10003817	PF00498.20;PF00069.19;	K02831 RAD53 ser/thr/tyr protein kinase RAD53 2.7.11.- Genetic Information Processing; Replication and Repair; DNA repair and recombination proteins [BR:ko03400] Cellular Processes; Cell Growth and Death; Cell cycle - yeast [PATH:ko04111] Cellular Processes; Cell Growth and Death; Meiosis - yeast [PATH:ko04113]	NA	FHKC_DICDI Probable serine/threonine-protein kinase fhkC OS=Dictyostelium discoideum GN=fhkC PE=3 SV=2	A8N5L4_COPC7 CAMK/RAD53 protein kinase OS=Coprinopsis cinerea (strain Okayama-7 / 130 / FGSC 9003) GN=CC1G_09319 PE=4 SV=1	CAMK/RAD53 protein kinase [Coprinopsis cinerea okayama7#130]	IPR000253; Forkhead-associated (FHA) domain IPR000719; Protein kinase, catalytic domain IPR002290; Serine/threonine-protein kinase domain IPR008271; Serine/threonine-protein kinase, active site IPR008984; SMAD/FHA domain IPR011009; Protein kinase-like domain IPR017441; Protein kinase, ATP binding site IPR017442; Serine/threonine-protein kinase-like domain IPR020635; Tyrosine-protein kinase, catal…	GO:0004672; protein kinase activity; Molecular Function GO:0004674; protein serine/threonine kinase activity; Molecular Function GO:0005515; protein binding; Molecular Function GO:0005524; ATP binding; Molecular Function GO:0006468; protein phosphorylation; Biological Process
G_lucidum_10003818	PF04081.7;	K03505 POLD4 DNA polymerase delta subunit 4 -- Metabolism; Nucleotide Metabolism; Purine metabolism [PATH:ko00230] Metabolism; Nucleotide Metabolism; Pyrimidine metabolism [PATH:ko00240] Genetic Information Processing; Replication and Repair; DNA replication [PATH:ko03030] Genetic Information Processing; Replication and Repair; DNA replication proteins [BR:ko03032] Genetic Information Processing;…	NA	DPOD4_SCHPO DNA polymerase delta subunit 4 OS=Schizosaccharomyces pombe GN=cdm1 PE=2 SV=1	E2LY75_CRIPE Putative uncharacterized protein OS=Moniliophthora perniciosa FA553 GN=MPER_12255 PE=4 SV=1	hypothetical protein MPER_12255 [Moniliophthora perniciosa FA553]	IPR007218; DNA polymerase delta, subunit 4	GO:0005634; nucleus; Cellular Component GO:0006260; DNA replication; Biological Process
G_lucidum_10003819	PF00628.23;PF10513.3;PF00439.19;	K11380 NTO1 NuA3 HAT complex component NTO1 -- Genetic Information Processing; Replication and Repair; Chromosome [BR:ko03036]	COG5141 PHD zinc finger-containing protein R General function prediction only ;	BRPF1_HUMAN Peregrin OS=Homo sapiens GN=BRPF1 PE=1 SV=2	B0CT47_LACBS Bromodomain containing protein OS=Laccaria bicolor (strain S238N-H82) GN=BRD16203 PE=4 SV=1	bromodomain containing protein [Laccaria bicolor S238N-H82]	IPR001487; Bromodomain IPR001965; Zinc finger, PHD-type IPR011011; Zinc finger, FYVE/PHD-type IPR013083; Zinc finger, RING/FYVE/PHD-type IPR019542; Enhancer of polycomb-like, N-terminal IPR019786; Zinc finger, PHD-type, conserved site IPR019787; Zinc finger, PHD-finger	GO:0005515; protein binding; Molecular Function GO:0008270; zinc ion binding; Molecular Function
G_lucidum_10003820	PF00022.13;	K05692 ACTB_G1 actin beta/gamma 1 -- Genetic Information Processing; Replication and Repair; Chromosome [BR:ko03036] Cellular Processes; Transport and Catabolism; Phagosome [PATH:ko04145] Cellular Processes; Cell Motility; Regulation of actin cytoskeleton [PATH:ko04810] Cellular Processes; Cell Motility; Cytoskeleton proteins [BR:ko04812] Cellular Processes; Cell Communication; Focal adhesion [PA…	COG5277 Actin and related proteins Z Cytoskeleton ;	ARP2_RAT Actin-related protein 2 OS=Rattus norvegicus GN=Actr2 PE=1 SV=1	D8Q243_SCHCO Putative uncharacterized protein OS=Schizophyllum commune H4-8 GN=SCHCODRAFT_76297 PE=3 SV=1	hypothetical protein SCHCODRAFT_76297 [Schizophyllum commune H4-8]	IPR004000; Actin-like IPR020902; Actin/actin-like conserved site	NA
G_lucidum_10003821	PF00153.21;	K13354 SLC25A17, PMP34 solute carrier family 25 member 17 -- Cellular Processes; Transport and Catabolism; Peroxisome [PATH:ko04146]	NA	YKQ9_SCHPO Uncharacterized mitochondrial carrier C688.09 OS=Schizosaccharomyces pombe GN=SPAC688.09 PE=2 SV=1	B0DCW5_LACBS Predicted protein OS=Laccaria bicolor (strain S238N-H82) GN=LACBIDRAFT_185165 PE=3 SV=1	predicted protein [Laccaria bicolor S238N-H82]	IPR001993; Mitochondrial substrate carrier IPR002067; Mitochondrial carrier protein IPR018108; Mitochondrial substrate/solute carrier	GO:0005488; binding; Molecular Function GO:0005743; mitochondrial inner membrane; Cellular Component GO:0006810; transport; Biological Process GO:0016020; membrane; Cellular Component GO:0055085; transmembrane transport; Biological Process
G_lucidum_10003822	PF03876.11;PF08292.6;	K03022 RPC25 DNA-directed RNA polymerase III subunit C25 2.7.7.6 Metabolism; Nucleotide Metabolism; Purine metabolism [PATH:ko00230] Metabolism; Nucleotide Metabolism; Pyrimidine metabolism [PATH:ko00240] Genetic Information Processing; Transcription; RNA polymerase [PATH:ko03020] Organismal Systems; Immune System; Cytosolic DNA-sensing pathway [PATH:ko04623]	COG1095 DNA-directed RNA polymerase, subunit E' K Transcription ;	RPC8_SCHPO DNA-directed RNA polymerase III subunit rpc8 OS=Schizosaccharomyces pombe GN=rpc25 PE=1 SV=1	A8PDR7_COPC7 Polymerase III polypeptide H OS=Coprinopsis cinerea (strain Okayama-7 / 130 / FGSC 9003) GN=CC1G_10436 PE=4 SV=1	polymerase III polypeptide H [Coprinopsis cinerea okayama7#130]	IPR005576; RNA polymerase Rpb7, N-terminal IPR013238; RNA polymerase III, subunit Rpc25 IPR016027; Nucleic acid-binding, OB-fold-like	GO:0003899; DNA-directed RNA polymerase activity; Molecular Function GO:0006350; transcription; Biological Process
G_lucidum_10003823	PF00394.16;PF07732.9;PF07731.8;	K05909 E1.10.3.2 -- -- Unclassified; Metabolism; Others	COG2132 Putative multicopper oxidases Q Secondary metabolites biosynthesis, transport and catabolism ;	LAC2_TRAVI Laccase-2 OS=Trametes villosa GN=LCC2 PE=3 SV=1	Q9P8G4_9APHY Laccase OS=Coriolopsis gallica GN=lcc1 PE=2 SV=2	laccase (EC 1.10.3.2) 3 precursor - white-rot fungus (Trametes villosa)	IPR001117; Multicopper oxidase, type 1 IPR002355; Multicopper oxidase, copper-binding site IPR008972; Cupredoxin IPR011706; Multicopper oxidase, type 2 IPR011707; Multicopper oxidase, type 3	GO:0005507; copper ion binding; Molecular Function GO:0016491; oxidoreductase activity; Molecular Function GO:0055114; oxidation-reduction process; Biological Process
G_lucidum_10003824	PF00394.16;PF07732.9;PF07731.8;	K05909 E1.10.3.2 -- -- Unclassified; Metabolism; Others	COG2132 Putative multicopper oxidases Q Secondary metabolites biosynthesis, transport and catabolism ;	LAC2_TRAVI Laccase-2 OS=Trametes villosa GN=LCC2 PE=3 SV=1	Q9P8G4_9APHY Laccase OS=Coriolopsis gallica GN=lcc1 PE=2 SV=2	laccase [Coriolopsis gallica]	IPR001117; Multicopper oxidase, type 1 IPR002355; Multicopper oxidase, copper-binding site IPR008972; Cupredoxin IPR011706; Multicopper oxidase, type 2 IPR011707; Multicopper oxidase, type 3	GO:0005507; copper ion binding; Molecular Function GO:0016491; oxidoreductase activity; Molecular Function GO:0055114; oxidation-reduction process; Biological Process
G_lucidum_10003825	NA	NA	NA	NA	NA	NA	NA	NA
G_lucidum_10003826	PF00069.19;	K02831 RAD53 ser/thr/tyr protein kinase RAD53 2.7.11.- Genetic Information Processing; Replication and Repair; DNA repair and recombination proteins [BR:ko03400] Cellular Processes; Cell Growth and Death; Cell cycle - yeast [PATH:ko04111] Cellular Processes; Cell Growth and Death; Meiosis - yeast [PATH:ko04113]	NA	RAD53_YEAST Serine/threonine-protein kinase RAD53 OS=Saccharomyces cerevisiae GN=RAD53 PE=1 SV=1	A8N5L4_COPC7 CAMK/RAD53 protein kinase OS=Coprinopsis cinerea (strain Okayama-7 / 130 / FGSC 9003) GN=CC1G_09319 PE=4 SV=1	CAMK/RAD53 protein kinase [Coprinopsis cinerea okayama7#130]	IPR000719; Protein kinase, catalytic domain IPR002290; Serine/threonine-protein kinase domain IPR008271; Serine/threonine-protein kinase, active site IPR011009; Protein kinase-like domain IPR017442; Serine/threonine-protein kinase-like domain IPR020635; Tyrosine-protein kinase, catalytic domain IPR020636; Calcium/calmodulin-dependent protein kinase-like IPR020648; Serine/threonine-protein kinase …	GO:0004672; protein kinase activity; Molecular Function GO:0004674; protein serine/threonine kinase activity; Molecular Function GO:0005524; ATP binding; Molecular Function GO:0006468; protein phosphorylation; Biological Process
G_lucidum_10003827	PF00498.20;	NA	NA	NA	B0D0E9_LACBS Predicted protein OS=Laccaria bicolor (strain S238N-H82) GN=LACBIDRAFT_293051 PE=4 SV=1	predicted protein [Laccaria bicolor S238N-H82]	IPR000253; Forkhead-associated (FHA) domain IPR008984; SMAD/FHA domain	GO:0005515; protein binding; Molecular Function
G_lucidum_10003828	PF07690.10;	K13336 PEX3 peroxin-3 -- Cellular Processes; Transport and Catabolism; Peroxisome [PATH:ko04146]	COG0477 Permeases of the major facilitator superfamily GEPR Carbohydrate transport and metabolism ; Amino acid transport and metabolism ; Inorganic ion transport and metabolism ; General function prediction only ;	YIZG_SCHPO Uncharacterized transporter C1002.16c OS=Schizosaccharomyces pombe GN=SPAC1002.16c PE=2 SV=1	B2ABX9_PODAN Predicted CDS Pa_0_1270 OS=Podospora anserina PE=4 SV=1	hypothetical protein [Podospora anserina S mat+]	IPR011701; Major facilitator superfamily MFS-1 IPR016196; Major facilitator superfamily, general substrate transporter IPR020846; Major facilitator superfamily	GO:0055085; transmembrane transport; Biological Process
G_lucidum_10003829	NA	NA	NA	NA	B8PBN0_POSPM Predicted protein OS=Postia placenta (strain ATCC 44394 / Madison 698-R) GN=POSPLDRAFT_95742 PE=4 SV=1	predicted protein [Postia placenta Mad-698-R]	IPR000719; Protein kinase, catalytic domain IPR008266; Tyrosine-protein kinase, active site IPR011009; Protein kinase-like domain	GO:0004672; protein kinase activity; Molecular Function GO:0004713; protein tyrosine kinase activity; Molecular Function GO:0005524; ATP binding; Molecular Function GO:0006468; protein phosphorylation; Biological Process
G_lucidum_10003830	NA	NA	NA	NA	B8PD76_POSPM Predicted protein OS=Postia placenta (strain ATCC 44394 / Madison 698-R) GN=POSPLDRAFT_106805 PE=4 SV=1	predicted protein [Postia placenta Mad-698-R]	NA	NA
G_lucidum_10003831	PF05405.8;	K02127 ATPeF0B, ATP5F1 F-type H+-transporting ATPase subunit b 3.6.3.14 Metabolism; Energy Metabolism; Oxidative phosphorylation [PATH:ko00190] Human Diseases; Neurodegenerative Diseases; Alzheimer's disease [PATH:ko05010] Human Diseases; Neurodegenerative Diseases; Parkinson's disease [PATH:ko05012] Human Diseases; Neurodegenerative Diseases; Huntington's disease [PATH:ko05016]	NA	ATPF_NEUCR ATP synthase subunit 4, mitochondrial OS=Neurospora crassa GN=atp-4 PE=3 SV=1	A8N8N8_COPC7 ATP synthase OS=Coprinopsis cinerea (strain Okayama-7 / 130 / FGSC 9003) GN=CC1G_09897 PE=4 SV=1	ATP synthase [Coprinopsis cinerea okayama7#130]	IPR008688; ATPase, F0 complex, subunit B, mitochondrial IPR013837; ATPase, F0 complex subunit B, mitochondrial, metazoa	GO:0000276; mitochondrial proton-transporting ATP synthase complex, coupling factor F(o); Cellular Component GO:0015078; hydrogen ion transmembrane transporter activity; Molecular Function GO:0015986; ATP synthesis coupled proton transport; Biological Process
G_lucidum_10003832	NA	NA	NA	NA	NA	NA	NA	NA
G_lucidum_10003833	PF00230.14;	K03441 GLP-F aquaglyceroporin related protein, other eukaryote -- Environmental Information Processing; Signaling Molecules and Interaction; Ion channels [BR:ko04040]	COG0580 Glycerol uptake facilitator and related permeases (Major Intrinsic Protein Family) G Carbohydrate transport and metabolism ;	AQP3_RAT Aquaporin-3 OS=Rattus norvegicus GN=Aqp3 PE=2 SV=1	B0DLE4_LACBS Predicted protein (Fragment) OS=Laccaria bicolor (strain S238N-H82) GN=LACBIDRAFT_252507 PE=3 SV=1	predicted protein [Laccaria bicolor S238N-H82]	IPR000425; Major intrinsic protein IPR023271; Aquaporin-like	GO:0005215; transporter activity; Molecular Function GO:0006810; transport; Biological Process GO:0016020; membrane; Cellular Component
G_lucidum_10003834	NA	NA	NA	NA	B8P6H0_POSPM Predicted protein OS=Postia placenta (strain ATCC 44394 / Madison 698-R) GN=POSPLDRAFT_94667 PE=4 SV=1	predicted protein [Postia placenta Mad-698-R]	NA	NA
G_lucidum_10003835	NA	NA	NA	NA	NA	NA	NA	NA
G_lucidum_10003836	NA	NA	NA	NA	B8P6P9_POSPM Predicted protein OS=Postia placenta (strain ATCC 44394 / Madison 698-R) GN=POSPLDRAFT_104240 PE=4 SV=1	predicted protein [Postia placenta Mad-698-R]	NA	NA
G_lucidum_10003837	NA	NA	NA	NA	NA	NA	NA	NA
G_lucidum_10003838	NA	NA	NA	NA	B8PBU5_POSPM Predicted protein OS=Postia placenta (strain ATCC 44394 / Madison 698-R) GN=POSPLDRAFT_106232 PE=4 SV=1	predicted protein [Postia placenta Mad-698-R]	NA	NA
G_lucidum_10003839	NA	NA	NA	NA	B8PK80_POSPM Predicted protein OS=Postia placenta (strain ATCC 44394 / Madison 698-R) GN=POSPLDRAFT_104897 PE=4 SV=1	predicted protein [Postia placenta Mad-698-R]	NA	NA
G_lucidum_10003840	PF04261.6;	K07223 K07223 putative iron-dependent peroxidase -- Unclassified; Cellular Processes and Signaling; Inorganic ion transport and metabolism	COG2837 Predicted iron-dependent peroxidase P Inorganic ion transport and metabolism ;	MSP2_MARSO Peroxidase 2 OS=Marasmius scorodonius GN=msp2 PE=1 SV=1	A8PBR4_COPC7 Peroxidase TAP OS=Coprinopsis cinerea (strain Okayama-7 / 130 / FGSC 9003) GN=CC1G_02714 PE=4 SV=1	peroxidase TAP [Coprinopsis cinerea okayama7#130]	IPR006314; Dyp-type peroxidase IPR011008; Dimeric alpha-beta barrel	NA
G_lucidum_10003841	NA	NA	NA	NA	B8P5Q1_POSPM Predicted protein OS=Postia placenta (strain ATCC 44394 / Madison 698-R) GN=POSPLDRAFT_90925 PE=4 SV=1	predicted protein [Postia placenta Mad-698-R]	NA	NA
G_lucidum_10003842	NA	NA	NA	NA	B8P5Q0_POSPM Predicted protein OS=Postia placenta (strain ATCC 44394 / Madison 698-R) GN=POSPLDRAFT_90924 PE=4 SV=1	predicted protein [Postia placenta Mad-698-R]	NA	NA
G_lucidum_10003843	PF01636.17;	NA	NA	NA	B8PLS1_POSPM Predicted protein OS=Postia placenta (strain ATCC 44394 / Madison 698-R) GN=POSPLDRAFT_91970 PE=4 SV=1	predicted protein [Postia placenta Mad-698-R]	IPR011009; Protein kinase-like domain	NA
G_lucidum_10003844	NA	NA	NA	YDCM_METS1 Uncharacterized protein in dcmA 3'region (Fragment) OS=Methylophilus sp. (strain DM11) PE=4 SV=1	Q4WZ18_ASPFU Putative uncharacterized protein OS=Aspergillus fumigatus GN=AFUA_3G15010 PE=4 SV=1	conserved hypothetical protein [Aspergillus fumigatus Af293]	NA	NA
G_lucidum_10003845	NA	NA	NA	NA	NA	NA	NA	NA
G_lucidum_10003846	NA	NA	NA	YDCM_METS1 Uncharacterized protein in dcmA 3'region (Fragment) OS=Methylophilus sp. (strain DM11) PE=4 SV=1	Q4WZ18_ASPFU Putative uncharacterized protein OS=Aspergillus fumigatus GN=AFUA_3G15010 PE=4 SV=1	conserved hypothetical protein [Aspergillus fumigatus Af293]	NA	NA
G_lucidum_10003847	PF08543.6;	K00868 pdxK, pdxY pyridoxine kinase 2.7.1.35 Metabolism; Metabolism of Cofactors and Vitamins; Vitamin B6 metabolism [PATH:ko00750]	COG2240 Pyridoxal/pyridoxine/pyridoxamine kinase H Coenzyme transport and metabolism ;	BUD16_YEAST Putative pyridoxal kinase BUD16 OS=Saccharomyces cerevisiae GN=BUD16 PE=1 SV=1	D8Q217_SCHCO Putative uncharacterized protein OS=Schizophyllum commune H4-8 GN=SCHCODRAFT_85087 PE=4 SV=1	hypothetical protein SCHCODRAFT_85087 [Schizophyllum commune H4-8]	IPR004625; Pyridoxal phosphate (active vitamin B6) biosynthesis, pyridoxal kinase IPR013749; Phosphomethylpyrimidine kinase type-1	GO:0008478; pyridoxal kinase activity; Molecular Function GO:0008615; pyridoxine biosynthetic process; Biological Process
G_lucidum_10003848	NA	NA	NA	NA	B8P7I8_POSPM Predicted protein OS=Postia placenta (strain ATCC 44394 / Madison 698-R) GN=POSPLDRAFT_101032 PE=4 SV=1	predicted protein [Postia placenta Mad-698-R]	NA	NA
G_lucidum_10003849	PF01852.13;	NA	NA	LEUNG_ARATH Transcriptional corepressor LEUNIG OS=Arabidopsis thaliana GN=LUG PE=1 SV=2	B0CTF0_LACBS Predicted protein OS=Laccaria bicolor (strain S238N-H82) GN=LACBIDRAFT_305101 PE=4 SV=1	predicted protein [Laccaria bicolor S238N-H82]	IPR002913; Lipid-binding START IPR006594; LisH dimerisation motif	GO:0005515; protein binding; Molecular Function
G_lucidum_10001173	PF07690.10;	K08157 TPO1 MFS transporter, DHA1 family, multidrug resistance protein -- Environmental Information Processing; Membrane Transport; Transporters [BR:ko02000]	NA	YHA8_SCHPO Uncharacterized MFS-type transporter C409.08 OS=Schizosaccharomyces pombe GN=SPBC409.08 PE=2 SV=1	D8PUI0_SCHCO Putative uncharacterized protein OS=Schizophyllum commune H4-8 GN=SCHCODRAFT_50448 PE=4 SV=1	hypothetical protein SCHCODRAFT_50448 [Schizophyllum commune H4-8]	IPR011701; Major facilitator superfamily MFS-1 IPR016196; Major facilitator superfamily, general substrate transporter IPR020846; Major facilitator superfamily	GO:0055085; transmembrane transport; Biological Process
G_lucidum_10001174	PF07690.10;	K08157 TPO1 MFS transporter, DHA1 family, multidrug resistance protein -- Environmental Information Processing; Membrane Transport; Transporters [BR:ko02000]	NA	YHA8_SCHPO Uncharacterized MFS-type transporter C409.08 OS=Schizosaccharomyces pombe GN=SPBC409.08 PE=2 SV=1	D8PUI0_SCHCO Putative uncharacterized protein OS=Schizophyllum commune H4-8 GN=SCHCODRAFT_50448 PE=4 SV=1	hypothetical protein SCHCODRAFT_50448 [Schizophyllum commune H4-8]	IPR011701; Major facilitator superfamily MFS-1 IPR016196; Major facilitator superfamily, general substrate transporter IPR020846; Major facilitator superfamily	GO:0055085; transmembrane transport; Biological Process
G_lucidum_10001175	PF00702.1;PF00122.14;	K01533 E3.6.3.4, ATP7, copA Cu2+-exporting ATPase 3.6.3.4 Unclassified; Metabolism; Energy metabolism	COG2217 Cation transport ATPase P Inorganic ion transport and metabolism ;	ATU1_YEAST Probable copper-transporting ATPase OS=Saccharomyces cerevisiae GN=PCA1 PE=2 SV=1	B6GWG0_PENCW Pc06g02280 protein OS=Penicillium chrysogenum (strain ATCC 28089 / DSM 1075 / Wisconsin 54-1255) GN=Pc06g02280 PE=3 SV=1	Pc06g02280 [Penicillium chrysogenum Wisconsin 54-1255]	IPR001757; ATPase, P-type, K/Mg/Cd/Cu/Zn/Na/Ca/Na/H-transporter IPR005834; Haloacid dehalogenase-like hydrolase IPR006121; Heavy metal transport/detoxification protein IPR008250; ATPase, P-type, ATPase-associated domain IPR023214; HAD-like domain IPR023299; ATPase, P-type, cytoplasmic domain N IPR023300; ATPase, P-type, cytoplasmic transduction domain A	GO:0003824; catalytic activity; Molecular Function GO:0005524; ATP binding; Molecular Function GO:0006754; ATP biosynthetic process; Biological Process GO:0008152; metabolic process; Biological Process GO:0015662; ATPase activity, coupled to transmembrane movement of ions, phosphorylative mechanism; Molecular Function GO:0016020; membrane; Cellular Component GO:0016820; hydrolase activity, acting…
G_lucidum_10001176	NA	NA	NA	NA	NA	NA	NA	NA
G_lucidum_10001177	NA	NA	NA	NA	B8PK38_POSPM Predicted protein OS=Postia placenta (strain ATCC 44394 / Madison 698-R) GN=POSPLDRAFT_94794 PE=4 SV=1	predicted protein [Postia placenta Mad-698-R]	IPR008266; Tyrosine-protein kinase, active site IPR011009; Protein kinase-like domain	GO:0004713; protein tyrosine kinase activity; Molecular Function GO:0005524; ATP binding; Molecular Function GO:0006468; protein phosphorylation; Biological Process
G_lucidum_10001178	NA	NA	NA	NA	B8PL63_POSPM Predicted protein OS=Postia placenta (strain ATCC 44394 / Madison 698-R) GN=POSPLDRAFT_101854 PE=4 SV=1	predicted protein [Postia placenta Mad-698-R]	IPR008266; Tyrosine-protein kinase, active site IPR011009; Protein kinase-like domain	GO:0004713; protein tyrosine kinase activity; Molecular Function GO:0005524; ATP binding; Molecular Function GO:0006468; protein phosphorylation; Biological Process
G_lucidum_10001179	NA	NA	NA	NA	NA	NA	NA	NA
G_lucidum_10001180	NA	NA	NA	NA	B8P6K0_POSPM Predicted protein OS=Postia placenta (strain ATCC 44394 / Madison 698-R) GN=POSPLDRAFT_99014 PE=4 SV=1	predicted protein [Postia placenta Mad-698-R]	NA	NA
G_lucidum_10001181	NA	NA	NA	NA	B8P261_POSPM Predicted protein OS=Postia placenta (strain ATCC 44394 / Madison 698-R) GN=POSPLDRAFT_105757 PE=4 SV=1	predicted protein [Postia placenta Mad-698-R]	NA	NA
G_lucidum_10001182	NA	NA	NA	NA	D8PYQ2_SCHCO Putative uncharacterized protein (Fragment) OS=Schizophyllum commune H4-8 GN=SCHCODRAFT_106466 PE=4 SV=1	hypothetical protein SCHCODRAFT_106466 [Schizophyllum commune H4-8]	NA	NA
G_lucidum_10001183	NA	NA	NA	NA	B8P0Z5_POSPM Predicted protein OS=Postia placenta (strain ATCC 44394 / Madison 698-R) GN=POSPLDRAFT_105015 PE=4 SV=1	predicted protein [Postia placenta Mad-698-R]	IPR008266; Tyrosine-protein kinase, active site IPR011009; Protein kinase-like domain	GO:0004713; protein tyrosine kinase activity; Molecular Function GO:0005524; ATP binding; Molecular Function GO:0006468; protein phosphorylation; Biological Process
G_lucidum_10001184	NA	NA	NA	NA	E2L9A7_CRIPE Putative uncharacterized protein OS=Moniliophthora perniciosa FA553 GN=MPER_02581 PE=4 SV=1	hypothetical protein MPER_02581 [Moniliophthora perniciosa FA553]	NA	NA
G_lucidum_10001185	NA	NA	NA	NA	B8P6K0_POSPM Predicted protein OS=Postia placenta (strain ATCC 44394 / Madison 698-R) GN=POSPLDRAFT_99014 PE=4 SV=1	predicted protein [Postia placenta Mad-698-R]	NA	NA
G_lucidum_10001186	NA	NA	NA	NA	B8P0Z5_POSPM Predicted protein OS=Postia placenta (strain ATCC 44394 / Madison 698-R) GN=POSPLDRAFT_105015 PE=4 SV=1	predicted protein [Postia placenta Mad-698-R]	IPR008266; Tyrosine-protein kinase, active site IPR011009; Protein kinase-like domain	GO:0004713; protein tyrosine kinase activity; Molecular Function GO:0005524; ATP binding; Molecular Function GO:0006468; protein phosphorylation; Biological Process
G_lucidum_10001187	NA	NA	NA	NA	NA	NA	NA	NA
G_lucidum_10001188	NA	NA	NA	ZN511_DANRE Zinc finger protein 511 OS=Danio rerio GN=znf511 PE=2 SV=1	B0CTM5_LACBS Predicted protein OS=Laccaria bicolor (strain S238N-H82) GN=LACBIDRAFT_305186 PE=4 SV=1	predicted protein [Laccaria bicolor S238N-H82]	IPR007087; Zinc finger, C2H2-type IPR013087; Zinc finger, C2H2-type/integrase, DNA-binding IPR015880; Zinc finger, C2H2-like	GO:0003676; nucleic acid binding; Molecular Function GO:0005622; intracellular; Cellular Component GO:0008270; zinc ion binding; Molecular Function
G_lucidum_10001189	PF03876.11;PF00575.17;	K03015 RPB7 DNA-directed RNA polymerase II subunit G -- Metabolism; Nucleotide Metabolism; Purine metabolism [PATH:ko00230] Metabolism; Nucleotide Metabolism; Pyrimidine metabolism [PATH:ko00240] Genetic Information Processing; Transcription; RNA polymerase [PATH:ko03020] Genetic Information Processing; Replication and Repair; DNA repair and recombination proteins [BR:ko03400] Human Diseases; Neu…	COG1095 DNA-directed RNA polymerase, subunit E' K Transcription ;	RPB7_SCHPO DNA-directed RNA polymerase II subunit rpb7 OS=Schizosaccharomyces pombe GN=rpb7 PE=1 SV=1	B8P5T6_POSPM Predicted protein OS=Postia placenta (strain ATCC 44394 / Madison 698-R) GN=POSPLDRAFT_87580 PE=4 SV=1	predicted protein [Postia placenta Mad-698-R]	IPR003029; Ribosomal protein S1, RNA-binding domain IPR005576; RNA polymerase Rpb7, N-terminal IPR012340; Nucleic acid-binding, OB-fold IPR016027; Nucleic acid-binding, OB-fold-like	GO:0003723; RNA binding; Molecular Function GO:0003899; DNA-directed RNA polymerase activity; Molecular Function GO:0006350; transcription; Biological Process
G_lucidum_10001190	PF00106.19;	K00059 fabG 3-oxoacyl-[acyl-carrier protein] reductase 1.1.1.100 Metabolism; Lipid Metabolism; Fatty acid biosynthesis [PATH:ko00061] Metabolism; Lipid Metabolism; Biosynthesis of unsaturated fatty acids [PATH:ko01040] Metabolism; Lipid Metabolism; Lipid biosynthesis proteins [BR:ko01004]	COG1028 Dehydrogenases with different specificities (related to short-chain alcohol dehydrogenases) IQR Lipid transport and metabolism ; Secondary metabolites biosynthesis, transport and catabolism ; General function prediction only ;	SDR1_PICAB Short-chain type dehydrogenase/reductase OS=Picea abies PE=2 SV=1	B8P7J4_POSPM Predicted protein OS=Postia placenta (strain ATCC 44394 / Madison 698-R) GN=POSPLDRAFT_101039 PE=4 SV=1	predicted protein [Postia placenta Mad-698-R]	IPR002198; Short-chain dehydrogenase/reductase SDR IPR002347; Glucose/ribitol dehydrogenase IPR016040; NAD(P)-binding domain IPR020904; Short-chain dehydrogenase/reductase, conserved site	GO:0003824; catalytic activity; Molecular Function GO:0005488; binding; Molecular Function GO:0008152; metabolic process; Biological Process GO:0016491; oxidoreductase activity; Molecular Function GO:0055114; oxidation-reduction process; Biological Process
G_lucidum_10000187	NA	NA	NA	NA	NA	NA	NA	NA
G_lucidum_10000049	NA	NA	NA	NA	NA	NA	NA	NA
G_lucidum_10000011	NA	NA	NA	NA	NA	NA	NA	NA
G_lucidum_10000146	NA	NA	NA	NA	B6QWE4_PENMQ Putative uncharacterized protein OS=Penicillium marneffei (strain ATCC 18224 / CBS 334.59 / QM 7333) GN=PMAA_007950 PE=4 SV=1	conserved hypothetical protein [Penicillium marneffei ATCC 18224]	NA	NA
G_lucidum_10000367	NA	NA	NA	NA	NA	NA	NA	NA
G_lucidum_10000368	NA	NA	NA	NA	NA	NA	NA	NA
G_lucidum_10000369	NA	NA	NA	NA	NA	NA	NA	NA
G_lucidum_10007547	NA	NA	NA	NA	B8PAQ1_POSPM Predicted protein OS=Postia placenta (strain ATCC 44394 / Madison 698-R) GN=POSPLDRAFT_101442 PE=4 SV=1	predicted protein [Postia placenta Mad-698-R]	IPR001878; Zinc finger, CCHC-type	GO:0003676; nucleic acid binding; Molecular Function GO:0008270; zinc ion binding; Molecular Function
G_lucidum_10007548	NA	NA	NA	NA	B8PH96_POSPM Predicted protein OS=Postia placenta (strain ATCC 44394 / Madison 698-R) GN=POSPLDRAFT_103949 PE=4 SV=1	predicted protein [Postia placenta Mad-698-R]	NA	NA
G_lucidum_10007549	PF12678.1;	K11982 RNF115_126 E3 ubiquitin-protein ligase RNF115/126 6.3.2.19 Genetic Information Processing; Folding, Sorting and Degradation; Ubiquitin system [BR:ko04121]	NA	YC0C_SCHPO Uncharacterized RING finger protein C4G3.12c OS=Schizosaccharomyces pombe GN=SPCC4G3.12c PE=2 SV=1	B0DUJ2_LACBS Predicted protein OS=Laccaria bicolor (strain S238N-H82) GN=LACBIDRAFT_310531 PE=4 SV=1	predicted protein [Laccaria bicolor S238N-H82]	IPR001841; Zinc finger, RING-type IPR013083; Zinc finger, RING/FYVE/PHD-type IPR018957; Zinc finger, C3HC4 RING-type	GO:0005515; protein binding; Molecular Function GO:0008270; zinc ion binding; Molecular Function
G_lucidum_10007550	NA	NA	NA	NA	B8PBE5_POSPM Predicted protein OS=Postia placenta (strain ATCC 44394 / Madison 698-R) GN=POSPLDRAFT_92861 PE=4 SV=1	predicted protein [Postia placenta Mad-698-R]	NA	NA
G_lucidum_10007551	PF07687.8;PF01546.22;	K08660 CNDP2 cytosolic nonspecific dipeptidase -- Metabolism; Enzyme Families; Peptidases [BR:ko01002]	COG0624 Acetylornithine deacetylase/Succinyl-diaminopimelate desuccinylase and related deacylases E Amino acid transport and metabolism ;	DUG2_YEAST Probable di- and tripeptidase DUG2 OS=Saccharomyces cerevisiae GN=DUG2 PE=1 SV=1	B0CVC1_LACBS Predicted protein OS=Laccaria bicolor (strain S238N-H82) GN=LACBIDRAFT_188163 PE=4 SV=1	predicted protein [Laccaria bicolor S238N-H82]	IPR002933; Peptidase M20 IPR011650; Peptidase M20, dimerisation	GO:0008152; metabolic process; Biological Process GO:0016787; hydrolase activity; Molecular Function
G_lucidum_10007552	PF00400.26;	K03362 FBXW1_11, BTRC, beta-TRCP F-box and WD-40 domain protein 1/11 -- Genetic Information Processing; Folding, Sorting and Degradation; Ubiquitin mediated proteolysis [PATH:ko04120] Genetic Information Processing; Folding, Sorting and Degradation; Ubiquitin system [BR:ko04121] Environmental Information Processing; Signal Transduction; Wnt signaling pathway [PATH:ko04310] Environmental Informati…	NA	DUG2_YEAST Probable di- and tripeptidase DUG2 OS=Saccharomyces cerevisiae GN=DUG2 PE=1 SV=1	D8PW56_SCHCO Putative uncharacterized protein OS=Schizophyllum commune H4-8 GN=SCHCODRAFT_50254 PE=4 SV=1	hypothetical protein SCHCODRAFT_50254 [Schizophyllum commune H4-8]	IPR001680; WD40 repeat IPR011046; WD40 repeat-like-containing domain IPR015943; WD40/YVTN repeat-like-containing domain IPR017986; WD40-repeat-containing domain IPR019775; WD40 repeat, conserved site IPR019781; WD40 repeat, subgroup IPR019782; WD40 repeat 2 IPR020472; G-protein beta WD-40 repeat	GO:0005515; protein binding; Molecular Function
G_lucidum_10007553	PF01627.17;	K11232 YPD1 osomolarity two-component system, phosphorelay intermediate protein YPD1 -- Environmental Information Processing; Signal Transduction; Two-component system [BR:ko02022] Environmental Information Processing; Signal Transduction; MAPK signaling pathway - yeast [PATH:ko04011]	COG2198 FOG: HPt domain T Signal transduction mechanisms ;	MPR1_SCHPO Multistep phosphorelay regulator 1 OS=Schizosaccharomyces pombe GN=mpr1 PE=1 SV=1	B8PBD4_POSPM Hypothetical histidine phosphotransferase (Fragment) OS=Postia placenta (strain ATCC 44394 / Madison 698-R) GN=POSPLDRAFT_45959 PE=4 SV=1	hypothetical histidine phosphotransferase [Postia placenta Mad-698-R]	IPR008207; Signal transduction histidine kinase, phosphotransfer (Hpt) domain	GO:0000160; two-component signal transduction system (phosphorelay); Biological Process GO:0004871; signal transducer activity; Molecular Function
G_lucidum_10007554	PF00650.14;	NA	NA	SEC14_SCHPO Sec14 cytosolic factor OS=Schizosaccharomyces pombe GN=sec14 PE=2 SV=1	D8PZF3_SCHCO Putative uncharacterized protein OS=Schizophyllum commune H4-8 GN=SCHCODRAFT_66525 PE=4 SV=1	hypothetical protein SCHCODRAFT_66525 [Schizophyllum commune H4-8]	IPR001251; Cellular retinaldehyde-binding/triple function, C-terminal	NA
G_lucidum_10007555	PF12765.1;PF12830.1;	K06672 SCC2, NIPBL cohesin loading factor subunit SCC2 -- Genetic Information Processing; Replication and Repair; Chromosome [BR:ko03036] Cellular Processes; Cell Growth and Death; Cell cycle - yeast [PATH:ko04111]	NA	NPBL_COPC7 Protein rad9 OS=Coprinopsis cinerea (strain Okayama-7 / 130 / FGSC 9003) GN=rad9 PE=2 SV=2	B0CX50_LACBS Predicted protein OS=Laccaria bicolor (strain S238N-H82) GN=LACBIDRAFT_292430 PE=4 SV=1	predicted protein [Laccaria bicolor S238N-H82]	IPR011989; Armadillo-like helical IPR016024; Armadillo-type fold	GO:0005488; binding; Molecular Function
G_lucidum_10007556	PF07717.10;PF04408.17;PF00271.25;	K12818 DHX8, PRP22 ATP-dependent RNA helicase DHX8/PRP22 3.6.4.13 Genetic Information Processing; Transcription; Spliceosome [PATH:ko03040] Genetic Information Processing; Transcription; Spliceosome [BR:ko03041]	COG1643 HrpA-like helicases L Replication, recombination and repair ;	PRH1_SCHPO Probable ATP-dependent RNA helicase prh1 OS=Schizosaccharomyces pombe GN=prh1 PE=2 SV=2	B0CX49_LACBS Predicted protein OS=Laccaria bicolor (strain S238N-H82) GN=LACBIDRAFT_245637 PE=4 SV=1	predicted protein [Laccaria bicolor S238N-H82]	IPR001650; Helicase, C-terminal IPR002464; DNA/RNA helicase, ATP-dependent, DEAH-box type, conserved site IPR007502; Helicase-associated domain IPR011545; DNA/RNA helicase, DEAD/DEAH box type, N-terminal IPR011709; Domain of unknown function DUF1605 IPR014001; DEAD-like helicase, N-terminal IPR014021; Helicase, superfamily 1/2, ATP-binding domain	GO:0003676; nucleic acid binding; Molecular Function GO:0004386; helicase activity; Molecular Function GO:0005524; ATP binding; Molecular Function GO:0008026; ATP-dependent helicase activity; Molecular Function
G_lucidum_10007557	PF00005.21;PF00664.17;	K05658 ABCB1 ATP-binding cassette, subfamily B (MDR/TAP), member 1 -- Environmental Information Processing; Membrane Transport; Transporters [BR:ko02000] Environmental Information Processing; Membrane Transport; ABC transporters [PATH:ko02010] Environmental Information Processing; Signaling Molecules and Interaction; Cellular antigens [BR:ko04090]	COG1132 ABC-type multidrug transport system, ATPase and permease components V Defense mechanisms ;	PMD1_SCHPO Leptomycin B resistance protein pmd1 OS=Schizosaccharomyces pombe GN=pmd1 PE=2 SV=2	B0CV33_LACBS Predicted protein OS=Laccaria bicolor (strain S238N-H82) GN=LACBIDRAFT_188284 PE=4 SV=1	predicted protein [Laccaria bicolor S238N-H82]	IPR001140; ABC transporter, transmembrane domain IPR003439; ABC transporter-like IPR003593; ATPase, AAA+ type, core IPR011527; ABC transporter, transmembrane domain, type 1 IPR017871; ABC transporter, conserved site IPR017940; ABC transporter integral membrane type 1	GO:0000166; nucleotide binding; Molecular Function GO:0005524; ATP binding; Molecular Function GO:0006810; transport; Biological Process GO:0016021; integral to membrane; Cellular Component GO:0016887; ATPase activity; Molecular Function GO:0017111; nucleoside-triphosphatase activity; Molecular Function GO:0042626; ATPase activity, coupled to transmembrane movement of substances; Molecular Functi…
G_lucidum_10007558	NA	NA	NA	NA	B0CX25_LACBS Predicted protein OS=Laccaria bicolor (strain S238N-H82) GN=LACBIDRAFT_308731 PE=4 SV=1	predicted protein [Laccaria bicolor S238N-H82]	IPR011009; Protein kinase-like domain	NA
G_lucidum_10007559	PF04950.6;PF00009.21;PF08142.6;	K00162 PDHB, pdhB pyruvate dehydrogenase E1 component subunit beta 1.2.4.1 Metabolism; Carbohydrate Metabolism; Glycolysis / Gluconeogenesis [PATH:ko00010] Metabolism; Carbohydrate Metabolism; Citrate cycle (TCA cycle) [PATH:ko00020] Metabolism; Carbohydrate Metabolism; Pyruvate metabolism [PATH:ko00620] Metabolism; Carbohydrate Metabolism; Butanoate metabolism [PATH:ko00650] Metabolism; Amino Ac…	COG5192 GTP-binding protein required for 40S ribosome biogenesis J Translation, ribosomal structure and biogenesis ;	BMS1_SCHPO Ribosome biogenesis protein BMS1 homolog OS=Schizosaccharomyces pombe GN=SPBC31E1.06 PE=1 SV=2	D6RP72_COPC7 GTP binding protein OS=Coprinopsis cinerea (strain Okayama-7 / 130 / FGSC 9003) GN=CC1G_15058 PE=4 SV=1	GTP binding protein [Coprinopsis cinerea okayama7#130]	IPR000795; Protein synthesis factor, GTP-binding IPR003593; ATPase, AAA+ type, core IPR007034; Ribosome biogenesis protein BMS1/TSR1, C-terminal IPR012948; AARP2CN	GO:0000166; nucleotide binding; Molecular Function GO:0003924; GTPase activity; Molecular Function GO:0005525; GTP binding; Molecular Function GO:0005634; nucleus; Cellular Component GO:0017111; nucleoside-triphosphatase activity; Molecular Function GO:0042254; ribosome biogenesis; Biological Process
G_lucidum_10007560	NA	NA	NA	NA	B8PBD3_POSPM Predicted protein OS=Postia placenta (strain ATCC 44394 / Madison 698-R) GN=POSPLDRAFT_92837 PE=4 SV=1	predicted protein [Postia placenta Mad-698-R]	NA	NA
G_lucidum_10007561	NA	NA	NA	NA	A8NRB3_COPC7 Putative uncharacterized protein OS=Coprinopsis cinerea (strain Okayama-7 / 130 / FGSC 9003) GN=CC1G_07166 PE=4 SV=1	hypothetical protein CC1G_07166 [Coprinopsis cinerea okayama7#130]	NA	NA
G_lucidum_10007562	PF02714.9;	NA	COG5594 Uncharacterized integral membrane protein S Function unknown ;	YAB9_SCHPO Uncharacterized membrane protein C2G11.09 OS=Schizosaccharomyces pombe GN=SPAC2G11.09 PE=2 SV=1	B0CVR6_LACBS Predicted protein OS=Laccaria bicolor (strain S238N-H82) GN=LACBIDRAFT_309184 PE=4 SV=1	predicted protein [Laccaria bicolor S238N-H82]	IPR003864; Domain of unknown function DUF221	GO:0016020; membrane; Cellular Component
G_lucidum_10007563	PF04800.6;	K03937 NDUFS4 NADH dehydrogenase (ubiquinone) Fe-S protein 4 1.6.5.3 1.6.99.3 Metabolism; Energy Metabolism; Oxidative phosphorylation [PATH:ko00190] Human Diseases; Neurodegenerative Diseases; Alzheimer's disease [PATH:ko05010] Human Diseases; Neurodegenerative Diseases; Parkinson's disease [PATH:ko05012] Human Diseases; Neurodegenerative Diseases; Huntington's disease [PATH:ko05016]	NA	NDUS4_NEUCR NADH-ubiquinone oxidoreductase 21 kDa subunit, mitochondrial OS=Neurospora crassa GN=nuo-21 PE=1 SV=2	A8NRB1_COPC7 NADH-ubiquinone oxidoreductase 21kDa subunit OS=Coprinopsis cinerea (strain Okayama-7 / 130 / FGSC 9003) GN=CC1G_07164 PE=4 SV=1	NADH-ubiquinone oxidoreductase 21kDa subunit [Coprinopsis cinerea okayama7#130]	IPR006885; NADH dehydrogenase ubiquinone Fe-S protein 4, mitochondrial	GO:0005743; mitochondrial inner membrane; Cellular Component GO:0016651; oxidoreductase activity, acting on NADH or NADPH; Molecular Function GO:0022900; electron transport chain; Biological Process
G_lucidum_10007564	NA	K08267 RICTOR rapamycin-insensitive companion of mTOR -- Environmental Information Processing; Signal Transduction; mTOR signaling pathway [PATH:ko04150]	NA	STE16_SCHPO Protein ste16 OS=Schizosaccharomyces pombe GN=ste16 PE=2 SV=1	B0CVR4_LACBS Predicted protein OS=Laccaria bicolor (strain S238N-H82) GN=LACBIDRAFT_309182 PE=4 SV=1	predicted protein [Laccaria bicolor S238N-H82]	IPR011989; Armadillo-like helical IPR016024; Armadillo-type fold	GO:0005488; binding; Molecular Function
G_lucidum_10007565	PF06246.6;	K12870 ISY1 pre-mRNA-splicing factor ISY1 -- Genetic Information Processing; Transcription; Spliceosome [PATH:ko03040] Genetic Information Processing; Transcription; Spliceosome [BR:ko03041]	NA	ISY1_CRYNE Pre-mRNA-splicing factor ISY1 OS=Cryptococcus neoformans GN=ISY1 PE=3 SV=1	B8PEI0_POSPM Predicted protein OS=Postia placenta (strain ATCC 44394 / Madison 698-R) GN=POSPLDRAFT_103757 PE=4 SV=1	predicted protein [Postia placenta Mad-698-R]	IPR009360; Isy1-like splicing	NA
G_lucidum_10007566	PF00724.14;	K00540 E1.-.-.- -- -- Unclassified; Metabolism; Others	COG1902 NADH:flavin oxidoreductases, Old Yellow Enzyme family C Energy production and conversion ;	OYEC_SCHPO Putative NADPH dehydrogenase C23G7.10c OS=Schizosaccharomyces pombe GN=SPBC23G7.10c PE=2 SV=1	B8PNS6_POSPM Predicted protein OS=Postia placenta (strain ATCC 44394 / Madison 698-R) GN=POSPLDRAFT_90658 PE=4 SV=1	predicted protein [Postia placenta Mad-698-R]	IPR001155; NADH:flavin oxidoreductase/NADH oxidase, N-terminal IPR013785; Aldolase-type TIM barrel	GO:0003824; catalytic activity; Molecular Function GO:0008152; metabolic process; Biological Process GO:0010181; FMN binding; Molecular Function GO:0016491; oxidoreductase activity; Molecular Function
G_lucidum_10007567	PF00080.14;	K04565 E1.15.1.1C, sodC, SOD1 Cu/Zn superoxide dismutase 1.15.1.1 Cellular Processes; Transport and Catabolism; Peroxisome [PATH:ko04146] Human Diseases; Neurodegenerative Diseases; Amyotrophic lateral sclerosis (ALS) [PATH:ko05014] Human Diseases; Neurodegenerative Diseases; Huntington's disease [PATH:ko05016] Human Diseases; Neurodegenerative Diseases; Prion diseases [PATH:ko05020]	COG2032 Cu/Zn superoxide dismutase P Inorganic ion transport and metabolism ;	SODC_CRYGA Superoxide dismutase [Cu-Zn] OS=Cryptococcus gattii GN=SOD1 PE=2 SV=3	Q9C0S4_CRYNE Superoxide dismutase [Cu-Zn] OS=Cryptococcus neoformans var. neoformans GN=SOD1 PE=2 SV=1	RecName: Full=Superoxide dismutase [Cu-Zn]	IPR001424; Superoxide dismutase, copper/zinc binding IPR018152; Superoxide dismutase, copper/zinc, binding site	GO:0006801; superoxide metabolic process; Biological Process GO:0046872; metal ion binding; Molecular Function GO:0055114; oxidation-reduction process; Biological Process
G_lucidum_10007568	NA	K00650 LCAT lecithin-cholesterol acyltransferase 2.3.1.43 Metabolism; Lipid Metabolism; Glycerophospholipid metabolism [PATH:ko00564]	NA	NA	D8PXA5_SCHCO Putative uncharacterized protein (Fragment) OS=Schizophyllum commune H4-8 GN=SCHCODRAFT_107111 PE=4 SV=1	hypothetical protein SCHCODRAFT_107111 [Schizophyllum commune H4-8]	IPR013830; Esterase, SGNH hydrolase-type IPR013831; Esterase, SGNH hydrolase-type, subgroup	GO:0016787; hydrolase activity; Molecular Function
G_lucidum_10007569	PF00635.20;	K06096 VAPA vesicle-associated membrane protein-associated protein A -- Cellular Processes; Cell Communication; Tight junction [PATH:ko04530]	COG5066 VAMP-associated protein involved in inositol metabolism U Intracellular trafficking, secretion, and vesicular transport ;	YDFC_SCHPO Uncharacterized protein C17C9.12 OS=Schizosaccharomyces pombe GN=SPAC17C9.12 PE=1 SV=2	D8PXA7_SCHCO Putative uncharacterized protein OS=Schizophyllum commune H4-8 GN=SCHCODRAFT_256580 PE=4 SV=1	hypothetical protein SCHCODRAFT_256580 [Schizophyllum commune H4-8]	IPR000535; Major sperm protein IPR008962; PapD-like IPR016763; Vesicle-associated membrane protein	GO:0005198; structural molecule activity; Molecular Function
G_lucidum_10007570	PF00433.18;PF00069.19;	K08282 E2.7.11.1 non-specific serine/threonine protein kinase 2.7.11.1 Unclassified; Cellular Processes and Signaling; Signal transduction mechanisms	NA	GAD8_SCHPO Serine/threonine-protein kinase gad8 OS=Schizosaccharomyces pombe GN=gad8 PE=1 SV=1	A8NS49_COPC7 AGC/Akt protein kinase OS=Coprinopsis cinerea (strain Okayama-7 / 130 / FGSC 9003) GN=CC1G_03026 PE=4 SV=1	AGC/Akt protein kinase [Coprinopsis cinerea okayama7#130]	IPR000719; Protein kinase, catalytic domain IPR000961; AGC-kinase, C-terminal IPR002290; Serine/threonine-protein kinase domain IPR008271; Serine/threonine-protein kinase, active site IPR011009; Protein kinase-like domain IPR017441; Protein kinase, ATP binding site IPR017442; Serine/threonine-protein kinase-like domain IPR017892; Protein kinase, C-terminal IPR020635; Tyrosine-protein kinase, cata…	GO:0004672; protein kinase activity; Molecular Function GO:0004674; protein serine/threonine kinase activity; Molecular Function GO:0005524; ATP binding; Molecular Function GO:0006468; protein phosphorylation; Biological Process
G_lucidum_10007571	PF01585.17;	NA	NA	NA	B0CVS5_LACBS Predicted protein OS=Laccaria bicolor (strain S238N-H82) GN=LACBIDRAFT_309196 PE=4 SV=1	predicted protein [Laccaria bicolor S238N-H82]	IPR000467; D111/G-patch	GO:0003676; nucleic acid binding; Molecular Function GO:0005622; intracellular; Cellular Component
G_lucidum_10007572	NA	NA	NA	NA	A8NRR1_COPC7 Putative uncharacterized protein OS=Coprinopsis cinerea (strain Okayama-7 / 130 / FGSC 9003) GN=CC1G_02921 PE=4 SV=2	hypothetical protein CC1G_02921 [Coprinopsis cinerea okayama7#130]	NA	NA
G_lucidum_10007573	PF12937.1;	NA	NA	NA	B0CVS4_LACBS Predicted protein OS=Laccaria bicolor (strain S238N-H82) GN=LACBIDRAFT_322986 PE=4 SV=1	predicted protein [Laccaria bicolor S238N-H82]	IPR006553; Leucine-rich repeat, cysteine-containing subtype	NA
G_lucidum_10007574	PF04193.8;	NA	NA	RTC2_YEAST Protein RTC2 OS=Saccharomyces cerevisiae GN=RTC2 PE=1 SV=1	D8PX98_SCHCO Putative uncharacterized protein (Fragment) OS=Schizophyllum commune H4-8 GN=SCHCODRAFT_75477 PE=4 SV=1	hypothetical protein SCHCODRAFT_75477 [Schizophyllum commune H4-8]	IPR006603; Cystinosin/ERS1p repeat	NA
G_lucidum_10007575	PF01145.19;	NA	COG0330 Membrane protease subunits, stomatin/prohibitin homologs O Posttranslational modification, protein turnover, chaperones ;	PHB2_YEAST Prohibitin-2 OS=Saccharomyces cerevisiae GN=PHB2 PE=1 SV=2	B0CVS2_LACBS Predicted protein OS=Laccaria bicolor (strain S238N-H82) GN=LACBIDRAFT_245445 PE=4 SV=1	predicted protein [Laccaria bicolor S238N-H82]	IPR000163; Prohibitin IPR001107; Band 7 protein	GO:0016020; membrane; Cellular Component
G_lucidum_10007576	PF05192.12;PF00488.15;	K08741 MSH5 DNA mismatch repair protein MSH5 -- Genetic Information Processing; Replication and Repair; DNA repair and recombination proteins [BR:ko03400]	COG0249 Mismatch repair ATPase (MutS family) L Replication, recombination and repair ;	MSH5_RAT MutS protein homolog 5 OS=Rattus norvegicus GN=Msh5 PE=2 SV=1	Q7Z7S7_COPCI MSH5 OS=Coprinopsis cinerea GN=msh5 PE=2 SV=1	MSH5 [Coprinopsis cinerea]	IPR000432; DNA mismatch repair protein MutS, C-terminal IPR007696; DNA mismatch repair protein MutS, core	GO:0005524; ATP binding; Molecular Function GO:0006298; mismatch repair; Biological Process GO:0030983; mismatched DNA binding; Molecular Function
G_lucidum_10007577	PF12937.1;PF12513.2;PF00271.25;	K12599 SKI2, SKIV2L antiviral helicase SKI2 3.6.1.- Genetic Information Processing; Folding, Sorting and Degradation; RNA degradation [PATH:ko03018]	NA	SUV3_SCHPO ATP-dependent RNA helicase suv3, mitochondrial OS=Schizosaccharomyces pombe GN=suv3 PE=2 SV=1	A8PAM9_COPC7 ATP-dependent RNA helicase suv3 OS=Coprinopsis cinerea (strain Okayama-7 / 130 / FGSC 9003) GN=CC1G_10400 PE=4 SV=1	ATP-dependent RNA helicase suv3 [Coprinopsis cinerea okayama7#130]	IPR001650; Helicase, C-terminal IPR001810; F-box domain, cyclin-like IPR022192; Mitochondrial degradasome RNA helicase subunit C-terminal	GO:0003676; nucleic acid binding; Molecular Function GO:0004386; helicase activity; Molecular Function GO:0005515; protein binding; Molecular Function GO:0005524; ATP binding; Molecular Function GO:0016817; hydrolase activity, acting on acid anhydrides; Molecular Function
G_lucidum_10007578	PF08293.5;	NA	NA	RT27_YEAST Mitochondral 37S ribosomal protein S27 OS=Saccharomyces cerevisiae GN=RSM27 PE=1 SV=1	B8PMT6_POSPM Predicted protein OS=Postia placenta (strain ATCC 44394 / Madison 698-R) GN=POSPLDRAFT_104402 PE=4 SV=1	predicted protein [Postia placenta Mad-698-R]	IPR013219; Ribosomal protein S27/S33, mitochondrial	NA
G_lucidum_10007579	PF06330.5;	NA	NA	TRI5_TRIHA Trichodiene synthase OS=Trichoderma harzianum GN=TRI5 PE=3 SV=1	B0DQM0_LACBS Predicted protein OS=Laccaria bicolor (strain S238N-H82) GN=LACBIDRAFT_307631 PE=4 SV=1	predicted protein [Laccaria bicolor S238N-H82]	IPR008949; Terpenoid synthase	NA
G_lucidum_10007580	PF00326.1;	K01423 E3.4.-.- -- -- Metabolism; Amino Acid Metabolism; Lysine degradation [PATH:ko00310] Metabolism; Metabolism of Cofactors and Vitamins; Biotin metabolism [PATH:ko00780]	COG1506 Dipeptidyl aminopeptidases/acylaminoacyl-peptidases E Amino acid transport and metabolism ;	DPP5_SCHPO Dipeptidyl-peptidase 5 OS=Schizosaccharomyces pombe GN=SPBC1711.12 PE=2 SV=1	B0CV84_LACBS Predicted protein OS=Laccaria bicolor (strain S238N-H82) GN=LACBIDRAFT_308976 PE=4 SV=1	predicted protein [Laccaria bicolor S238N-H82]	IPR001375; Peptidase S9, prolyl oligopeptidase, catalytic domain IPR015943; WD40/YVTN repeat-like-containing domain	GO:0005515; protein binding; Molecular Function GO:0006508; proteolysis; Biological Process GO:0008236; serine-type peptidase activity; Molecular Function
G_lucidum_10007581	PF00004.23;	K03065 PSMC3, RPT5 26S proteasome regulatory subunit T5 -- Genetic Information Processing; Folding, Sorting and Degradation; Proteasome [PATH:ko03050] Genetic Information Processing; Folding, Sorting and Degradation; Proteasome [BR:ko03051]	COG1222 ATP-dependent 26S proteasome regulatory subunit O Posttranslational modification, protein turnover, chaperones ;	PRS6A_HUMAN 26S protease regulatory subunit 6A OS=Homo sapiens GN=PSMC3 PE=1 SV=3	A8NRC6_COPC7 Putative uncharacterized protein OS=Coprinopsis cinerea (strain Okayama-7 / 130 / FGSC 9003) GN=CC1G_07176 PE=3 SV=1	hypothetical protein CC1G_07176 [Coprinopsis cinerea okayama7#130]	IPR003593; ATPase, AAA+ type, core IPR003959; ATPase, AAA-type, core IPR003960; ATPase, AAA-type, conserved site IPR005937; 26S proteasome subunit P45	GO:0000166; nucleotide binding; Molecular Function GO:0005524; ATP binding; Molecular Function GO:0005737; cytoplasm; Cellular Component GO:0016787; hydrolase activity; Molecular Function GO:0017111; nucleoside-triphosphatase activity; Molecular Function GO:0030163; protein catabolic process; Biological Process
G_lucidum_10007582	NA	NA	NA	NA	E2LXV4_CRIPE Putative uncharacterized protein OS=Moniliophthora perniciosa FA553 GN=MPER_12123 PE=4 SV=1	hypothetical protein MPER_12123 [Moniliophthora perniciosa FA553]	NA	NA
G_lucidum_10007583	PF09340.4;	K11344 EAF6 chromatin modification-related protein EAF6 -- Genetic Information Processing; Replication and Repair; Chromosome [BR:ko03036]	NA	EAF6_YARLI Chromatin modification-related protein EAF6 OS=Yarrowia lipolytica GN=EAF6 PE=3 SV=1	B0CVI5_LACBS Predicted protein OS=Laccaria bicolor (strain S238N-H82) GN=LACBIDRAFT_309087 PE=4 SV=1	predicted protein [Laccaria bicolor S238N-H82]	IPR015418; Histone H4 acetyltransferase, NuA4 complex, Eaf6	NA
G_lucidum_10007584	PF07200.7;	K12185 VPS37 ESCRT-I complex subunit VPS37 -- Cellular Processes; Transport and Catabolism; Endocytosis [PATH:ko04144]	NA	VP37A_HUMAN Vacuolar protein sorting-associated protein 37A OS=Homo sapiens GN=VPS37A PE=1 SV=1	B0CVI3_LACBS Predicted protein OS=Laccaria bicolor (strain S238N-H82) GN=LACBIDRAFT_188376 PE=4 SV=1	predicted protein [Laccaria bicolor S238N-H82]	IPR009851; Modifier of rudimentary, Modr	NA
G_lucidum_10007585	PF03443.8;	K01238 E3.2.1.- -- -- Unclassified; Metabolism; Others	NA	EGLD_ASPNC Probable endo-beta-1,4-glucanase D OS=Aspergillus niger (strain CBS 513.88 / FGSC A1513) GN=eglD PE=3 SV=1	A8NRC9_COPC7 Endoglucanase II OS=Coprinopsis cinerea (strain Okayama-7 / 130 / FGSC 9003) GN=CC1G_07179 PE=4 SV=1	endoglucanase II [Coprinopsis cinerea okayama7#130]	IPR005103; Glycoside hydrolase, family 61	NA
G_lucidum_10007586	PF08637.4;	K07901 RAB8A, MEL Ras-related protein Rab-8A -- Environmental Information Processing; Signaling Molecules and Interaction; GTP-binding proteins [BR:ko04031]	NA	NCA2_SCHPO Nuclear control of ATPase protein 2 OS=Schizosaccharomyces pombe GN=nca2 PE=2 SV=1	B0CV83_LACBS Predicted protein OS=Laccaria bicolor (strain S238N-H82) GN=LACBIDRAFT_292510 PE=4 SV=1	predicted protein [Laccaria bicolor S238N-H82]	IPR013946; Nuclear control of ATP synthase 2	NA
G_lucidum_10007587	NA	NA	NA	NA	NA	NA	NA	NA
G_lucidum_10007588	NA	NA	NA	MCFN_DICDI Mitochondrial substrate carrier family protein N OS=Dictyostelium discoideum GN=mcfN PE=1 SV=2	D8PXC3_SCHCO Putative uncharacterized protein OS=Schizophyllum commune H4-8 GN=SCHCODRAFT_52784 PE=3 SV=1	hypothetical protein SCHCODRAFT_52784 [Schizophyllum commune H4-8]	IPR001993; Mitochondrial substrate carrier	GO:0005488; binding; Molecular Function GO:0006810; transport; Biological Process GO:0016020; membrane; Cellular Component GO:0055085; transmembrane transport; Biological Process
G_lucidum_10007589	NA	NA	NA	MPCP_YEAST Mitochondrial phosphate carrier protein OS=Saccharomyces cerevisiae GN=MIR1 PE=1 SV=1	B0CVS1_LACBS Predicted protein OS=Laccaria bicolor (strain S238N-H82) GN=LACBIDRAFT_188276 PE=3 SV=1	predicted protein [Laccaria bicolor S238N-H82]	NA	NA
G_lucidum_10007590	PF06330.5;	NA	NA	TRI5_FUSAS Trichodiene synthase OS=Fusarium asiaticum GN=TRI5 PE=3 SV=1	B0DQM0_LACBS Predicted protein OS=Laccaria bicolor (strain S238N-H82) GN=LACBIDRAFT_307631 PE=4 SV=1	predicted protein [Laccaria bicolor S238N-H82]	IPR008949; Terpenoid synthase	NA
G_lucidum_10007591	PF06330.5;	K12249 TRI5 trichodiene synthase 4.2.3.6 Metabolism; Metabolism of Terpenoids and Polyketides; Sesquiterpenoid biosynthesis [PATH:ko00909]	NA	TRI5_TRIHA Trichodiene synthase OS=Trichoderma harzianum GN=TRI5 PE=3 SV=1	B0DQM0_LACBS Predicted protein OS=Laccaria bicolor (strain S238N-H82) GN=LACBIDRAFT_307631 PE=4 SV=1	predicted protein [Laccaria bicolor S238N-H82]	IPR008949; Terpenoid synthase	NA
G_lucidum_10007592	PF06330.5;	NA	NA	TRI5_GIBPU Trichodiene synthase OS=Gibberella pulicaris GN=TRI5 PE=3 SV=1	B0DQM0_LACBS Predicted protein OS=Laccaria bicolor (strain S238N-H82) GN=LACBIDRAFT_307631 PE=4 SV=1	predicted protein [Laccaria bicolor S238N-H82]	IPR008949; Terpenoid synthase	NA
G_lucidum_10007593	PF00618.14;PF07653.11;PF00617.13;	K03099 SOS son of sevenless -- Environmental Information Processing; Signal Transduction; MAPK signaling pathway [PATH:ko04010] Environmental Information Processing; Signal Transduction; MAPK signaling pathway - fly [PATH:ko04013] Environmental Information Processing; Signal Transduction; ErbB signaling pathway [PATH:ko04012] Environmental Information Processing; Signal Transduction; Jak-STAT sig…	NA	CDC25_YEAST Cell division control protein 25 OS=Saccharomyces cerevisiae GN=CDC25 PE=1 SV=1	B0CV58_LACBS Predicted protein OS=Laccaria bicolor (strain S238N-H82) GN=LACBIDRAFT_308947 PE=4 SV=1	predicted protein [Laccaria bicolor S238N-H82]	IPR000651; Ras-like guanine nucleotide exchange factor, N-terminal IPR001452; Src homology-3 domain IPR001895; Guanine-nucleotide dissociation stimulator CDC25 IPR008937; Ras guanine nucleotide exchange factor IPR011511; Variant SH3 IPR019804; Ras guanine-nucleotide exchange factor, conserved site	GO:0005085; guanyl-nucleotide exchange factor activity; Molecular Function GO:0005515; protein binding; Molecular Function GO:0005622; intracellular; Cellular Component GO:0007264; small GTPase mediated signal transduction; Biological Process GO:0051056; regulation of small GTPase mediated signal transduction; Biological Process
G_lucidum_10007594	PF03824.10;	K07241 nixA high-affinity nickel-transport protein -- Unclassified; Cellular Processes and Signaling; Other ion-coupled transporters	COG3376 High-affinity nickel permease P Inorganic ion transport and metabolism ;	HUPN_BRAJA Hydrogenase nickel incorporation protein hupN OS=Bradyrhizobium japonicum GN=hupN PE=3 SV=1	D8QCV3_SCHCO Putative uncharacterized protein OS=Schizophyllum commune H4-8 GN=SCHCODRAFT_69749 PE=4 SV=1	hypothetical protein SCHCODRAFT_69749 [Schizophyllum commune H4-8]	IPR011541; Nickel/cobalt transporter, high-affinity	GO:0016021; integral to membrane; Cellular Component GO:0030001; metal ion transport; Biological Process GO:0046872; metal ion binding; Molecular Function GO:0055085; transmembrane transport; Biological Process
G_lucidum_10007595	PF00134.17;	K00924 E2.7.1.- -- -- Unclassified; Cellular Processes and Signaling; Signal transduction mechanisms	COG5333 Cdk activating kinase (CAK)/RNA polymerase II transcription initiation/nucleotide excision repair factor TFIIH/TFIIK, cyclin H subunit DKL Cell cycle control, cell division, chromosome partitioning ; Transcription ; Replication, recombination and repair ;	CTK2_SCHPO CTD kinase subunit beta OS=Schizosaccharomyces pombe GN=lsc1 PE=1 SV=1	A8NR92_COPC7 Putative uncharacterized protein OS=Coprinopsis cinerea (strain Okayama-7 / 130 / FGSC 9003) GN=CC1G_07151 PE=3 SV=2	hypothetical protein CC1G_07151 [Coprinopsis cinerea okayama7#130]	IPR006670; Cyclin IPR006671; Cyclin, N-terminal IPR011028; Cyclin-like IPR013763; Cyclin-related IPR015429; Transcription regulator cyclin	NA
G_lucidum_10007596	PF06728.7;	K05293 PIGU phosphatidylinositol glycan, class U -- Metabolism; Glycan Biosynthesis and Metabolism; Glycosylphosphatidylinositol(GPI)-anchor biosynthesis [PATH:ko00563]	NA	CDC91_YEAST GPI transamidase component GAB1 OS=Saccharomyces cerevisiae GN=GAB1 PE=1 SV=1	A8N7A6_COPC7 Cell division cycle protein 91 OS=Coprinopsis cinerea (strain Okayama-7 / 130 / FGSC 9003) GN=CC1G_03249 PE=4 SV=2	cell division cycle protein 91 [Coprinopsis cinerea okayama7#130]	IPR009600; GPI transamidase subunit PIG-U	GO:0005789; endoplasmic reticulum membrane; Cellular Component GO:0006506; GPI anchor biosynthetic process; Biological Process GO:0016021; integral to membrane; Cellular Component
G_lucidum_10007597	PF01073.13;	K07748 E1.1.1.170, NSDHL, ERG26 sterol-4alpha-carboxylate 3-dehydrogenase (decarboxylating) 1.1.1.170 Metabolism; Lipid Metabolism; Steroid biosynthesis [PATH:ko00100]	COG0451 Nucleoside-diphosphate-sugar epimerases MG Cell wall/membrane/envelope biogenesis ; Carbohydrate transport and metabolism ;	ERG26_YEAST Sterol-4-alpha-carboxylate 3-dehydrogenase, decarboxylating OS=Saccharomyces cerevisiae GN=ERG26 PE=1 SV=1	B0CVT7_LACBS Predicted protein OS=Laccaria bicolor (strain S238N-H82) GN=LACBIDRAFT_188460 PE=3 SV=1	predicted protein [Laccaria bicolor S238N-H82]	IPR002225; 3-beta hydroxysteroid dehydrogenase/isomerase IPR016040; NAD(P)-binding domain	GO:0003824; catalytic activity; Molecular Function GO:0003854; 3-beta-hydroxy-delta5-steroid dehydrogenase activity; Molecular Function GO:0005488; binding; Molecular Function GO:0006694; steroid biosynthetic process; Biological Process GO:0008152; metabolic process; Biological Process
G_lucidum_10007598	PF04248.6;	K12613 DCP2 mRNA-decapping enzyme subunit 2 3.-.-.- Genetic Information Processing; Folding, Sorting and Degradation; RNA degradation [PATH:ko03018]	COG2343 Uncharacterized protein conserved in bacteria S Function unknown ;	NA	B0CX13_LACBS Predicted protein OS=Laccaria bicolor (strain S238N-H82) GN=LACBIDRAFT_292416 PE=4 SV=1	predicted protein [Laccaria bicolor S238N-H82]	IPR007361; Protein of unknown function DUF427	NA
G_lucidum_10007599	PF00153.21;	K13354 SLC25A17, PMP34 solute carrier family 25 member 17 -- Cellular Processes; Transport and Catabolism; Peroxisome [PATH:ko04146]	NA	MCFW_DICDI Mitochondrial substrate carrier family protein W OS=Dictyostelium discoideum GN=mcfW PE=3 SV=1	B8PMF0_POSPM Predicted protein OS=Postia placenta (strain ATCC 44394 / Madison 698-R) GN=POSPLDRAFT_92975 PE=3 SV=1	predicted protein [Postia placenta Mad-698-R]	IPR001993; Mitochondrial substrate carrier IPR002067; Mitochondrial carrier protein IPR018108; Mitochondrial substrate/solute carrier	GO:0005488; binding; Molecular Function GO:0005743; mitochondrial inner membrane; Cellular Component GO:0006810; transport; Biological Process GO:0016020; membrane; Cellular Component GO:0055085; transmembrane transport; Biological Process
G_lucidum_10007600	NA	NA	NA	NA	D8Q088_SCHCO Expressed protein OS=Schizophyllum commune H4-8 GN=SCHCODRAFT_81729 PE=4 SV=1	expressed protein [Schizophyllum commune H4-8]	NA	NA
G_lucidum_10007601	NA	NA	NA	NA	NA	NA	NA	NA
G_lucidum_10007602	PF06108.6;	NA	NA	NA	D1ZNX3_SORMK Whole genome shotgun sequence assembly, scaffold_67 OS=Sordaria macrospora (strain ATCC MYA-333 / DSM 997 / K(L3346) / K-hell) GN=SMAC_06556 PE=4 SV=1	unnamed protein product [Sordaria macrospora]	IPR009297; Protein of unknown function DUF952	NA
G_lucidum_10007603	PF03372.17;	K07004 K07004 -- -- Unclassified; Poorly Characterized; General function prediction only	COG2374 Predicted extracellular nuclease R General function prediction only ;	NA	D8Q028_SCHCO Putative uncharacterized protein OS=Schizophyllum commune H4-8 GN=SCHCODRAFT_52565 PE=4 SV=1	hypothetical protein SCHCODRAFT_52565 [Schizophyllum commune H4-8]	IPR005135; Endonuclease/exonuclease/phosphatase	NA
G_lucidum_10007604	PF07065.8;	NA	NA	CD123_BOTFB Cell division cycle protein 123 OS=Botryotinia fuckeliana (strain B05.10) GN=cdc123 PE=3 SV=1	A8NQS1_COPC7 Cytoplasmic protein OS=Coprinopsis cinerea (strain Okayama-7 / 130 / FGSC 9003) GN=CC1G_03448 PE=4 SV=1	cytoplasmic protein [Coprinopsis cinerea okayama7#130]	IPR009772; D123	NA
G_lucidum_10007605	NA	NA	NA	NA	D8Q5K2_SCHCO Putative uncharacterized protein (Fragment) OS=Schizophyllum commune H4-8 GN=SCHCODRAFT_109245 PE=4 SV=1	hypothetical protein SCHCODRAFT_109245 [Schizophyllum commune H4-8]	NA	NA
G_lucidum_10007606	PF00702.1;	K01112 E3.1.3.- -- -- Metabolism; Carbohydrate Metabolism; Fructose and mannose metabolism [PATH:ko00051] Metabolism; Metabolism of Cofactors and Vitamins; Thiamine metabolism [PATH:ko00730] Metabolism; Metabolism of Cofactors and Vitamins; Riboflavin metabolism [PATH:ko00740]	COG0637 Predicted phosphatase/phosphohexomutase R General function prediction only ;	DOG2_YEAST 2-deoxyglucose-6-phosphate phosphatase 2 OS=Saccharomyces cerevisiae GN=DOG2 PE=1 SV=1	D8PXS6_SCHCO Putative uncharacterized protein OS=Schizophyllum commune H4-8 GN=SCHCODRAFT_84866 PE=4 SV=1	hypothetical protein SCHCODRAFT_84866 [Schizophyllum commune H4-8]	IPR005834; Haloacid dehalogenase-like hydrolase IPR006402; HAD-superfamily hydrolase, subfamily IA, variant 3 IPR023198; Phosphoglycolate phosphatase, domain 2 IPR023214; HAD-like domain	GO:0003824; catalytic activity; Molecular Function GO:0008152; metabolic process; Biological Process GO:0016787; hydrolase activity; Molecular Function
G_lucidum_10007607	PF06330.5;	NA	NA	NA	B0DQM0_LACBS Predicted protein OS=Laccaria bicolor (strain S238N-H82) GN=LACBIDRAFT_307631 PE=4 SV=1	predicted protein [Laccaria bicolor S238N-H82]	IPR008949; Terpenoid synthase	NA
G_lucidum_10007608	PF08170.6;PF06978.5;	K01164 E3.1.26.5 ribonuclease P 3.1.26.5 Unclassified; Genetic Information Processing; Translation proteins	NA	POPI_SCHPO Ribonucleases P/MRP protein subunit pop1 OS=Schizosaccharomyces pombe GN=pop1 PE=2 SV=1	B0CVT5_LACBS Predicted protein OS=Laccaria bicolor (strain S238N-H82) GN=LACBIDRAFT_230763 PE=4 SV=1	predicted protein [Laccaria bicolor S238N-H82]	IPR009723; Ribonuclease P/MRP, subunit POP1 IPR012590; POPLD	GO:0001682; tRNA 5'-leader removal; Biological Process GO:0004526; ribonuclease P activity; Molecular Function GO:0006396; RNA processing; Biological Process
G_lucidum_10007609	PF10444.3;	NA	NA	NA	B8PMH3_POSPM Predicted protein OS=Postia placenta (strain ATCC 44394 / Madison 698-R) GN=POSPLDRAFT_89720 PE=4 SV=1	predicted protein [Postia placenta Mad-698-R]	IPR018851; Borealin-like, N-terminal	NA
G_lucidum_10007610	NA	NA	NA	NA	A8NSC4_COPC7 Putative uncharacterized protein OS=Coprinopsis cinerea (strain Okayama-7 / 130 / FGSC 9003) GN=CC1G_04970 PE=4 SV=1	hypothetical protein CC1G_04970 [Coprinopsis cinerea okayama7#130]	NA	NA
G_lucidum_10007611	NA	K12820 DHX15, PRP43 pre-mRNA-splicing factor ATP-dependent RNA helicase DHX15/PRP43 3.6.4.13 Genetic Information Processing; Transcription; Spliceosome [PATH:ko03040] Genetic Information Processing; Transcription; Spliceosome [BR:ko03041]	NA	VWKA_DICDI Alpha-protein kinase vwkA OS=Dictyostelium discoideum GN=vwkA PE=1 SV=1	B0CV55_LACBS Predicted protein OS=Laccaria bicolor (strain S238N-H82) GN=LACBIDRAFT_292500 PE=4 SV=1	predicted protein [Laccaria bicolor S238N-H82]	IPR002035; von Willebrand factor, type A	GO:0005515; protein binding; Molecular Function
G_lucidum_10007612	PF08355.6;PF08477.7;PF00071.16;PF08356.6;	K06883 K06883 -- -- Unclassified; Poorly Characterized; General function prediction only	COG1100 GTPase SAR1 and related small G proteins R General function prediction only ;	GEM1_CRYNE Mitochondrial Rho GTPase 1 OS=Cryptococcus neoformans GN=GEM1 PE=3 SV=2	A8NSC7_COPC7 Mitochondrial Rho GTPase OS=Coprinopsis cinerea (strain Okayama-7 / 130 / FGSC 9003) GN=CC1G_04972 PE=3 SV=2	mitochondrial Rho 1 [Coprinopsis cinerea okayama7#130]	IPR001806; Ras GTPase IPR002048; Calcium-binding EF-hand IPR003577; Ras small GTPase, Ras type IPR003578; Small GTPase, Rho type IPR003579; Ras small GTPase, Rab type IPR005225; Small GTP-binding protein IPR011992; EF-hand-like domain IPR013566; EF hand associated, type-1 IPR013567; EF hand associated, type-2 IPR013684; Mitochondrial Rho-like IPR013753; Ras IPR018247; EF-Hand 1, calcium-binding s…	GO:0005509; calcium ion binding; Molecular Function GO:0005525; GTP binding; Molecular Function GO:0005622; intracellular; Cellular Component GO:0005741; mitochondrial outer membrane; Cellular Component GO:0007264; small GTPase mediated signal transduction; Biological Process GO:0015031; protein transport; Biological Process GO:0047497; mitochondrion transport along microtubule; Biological Process
G_lucidum_10007613	PF12937.1;	NA	NA	NA	B0CV57_LACBS Predicted protein OS=Laccaria bicolor (strain S238N-H82) GN=LACBIDRAFT_292502 PE=4 SV=1	predicted protein [Laccaria bicolor S238N-H82]	IPR001810; F-box domain, cyclin-like IPR011046; WD40 repeat-like-containing domain IPR015943; WD40/YVTN repeat-like-containing domain IPR022364; F-box domain, Skp2-like	GO:0005515; protein binding; Molecular Function
G_lucidum_10007614	NA	K00549 E2.1.1.14, metE 5-methyltetrahydropteroyltriglutamate--homocysteine methyltransferase 2.1.1.14 Metabolism; Amino Acid Metabolism; Cysteine and methionine metabolism [PATH:ko00270]	COG0620 Methionine synthase II (cobalamin-independent) E Amino acid transport and metabolism ;	METE_SULAC Probable methylcobalamin:homocysteine methyltransferase OS=Sulfolobus acidocaldarius GN=metE PE=3 SV=1	D5GBR8_9PEZI Whole genome shotgun sequence assembly, scaffold_2, strain Mel28 OS=Tuber melanosporum GN=GSTUM_00005542001 PE=4 SV=1	methionine synthase II (cobalamin-independent) [Metarhizium anisopliae ARSEF 23]	NA	NA
G_lucidum_10007615	NA	NA	NA	NA	NA	NA	NA	NA
G_lucidum_10007616	PF00271.25;	K10901 BLM, RECQL3, SGS1 bloom syndrome protein 3.6.1.- Genetic Information Processing; Replication and Repair; DNA replication proteins [BR:ko03032] Genetic Information Processing; Replication and Repair; Homologous recombination [PATH:ko03440] Genetic Information Processing; Replication and Repair; DNA repair and recombination proteins [BR:ko03400]	COG0514 Superfamily II DNA helicase L Replication, recombination and repair ;	BLM_XENLA Bloom syndrome protein homolog OS=Xenopus laevis GN=blm PE=2 SV=1	B0CZ31_LACBS Predicted protein OS=Laccaria bicolor (strain S238N-H82) GN=LACBIDRAFT_312100 PE=4 SV=1	predicted protein [Laccaria bicolor S238N-H82]	IPR001650; Helicase, C-terminal IPR004589; DNA helicase, ATP-dependent, RecQ type IPR011545; DNA/RNA helicase, DEAD/DEAH box type, N-terminal IPR014021; Helicase, superfamily 1/2, ATP-binding domain	GO:0003676; nucleic acid binding; Molecular Function GO:0004386; helicase activity; Molecular Function GO:0005524; ATP binding; Molecular Function GO:0006310; DNA recombination; Biological Process GO:0008026; ATP-dependent helicase activity; Molecular Function
G_lucidum_10007617	PF00702.1;	K01112 E3.1.3.- -- -- Metabolism; Carbohydrate Metabolism; Fructose and mannose metabolism [PATH:ko00051] Metabolism; Metabolism of Cofactors and Vitamins; Thiamine metabolism [PATH:ko00730] Metabolism; Metabolism of Cofactors and Vitamins; Riboflavin metabolism [PATH:ko00740]	COG0637 Predicted phosphatase/phosphohexomutase R General function prediction only ;	GPP2_YEAST (DL)-glycerol-3-phosphatase 2 OS=Saccharomyces cerevisiae GN=HOR2 PE=1 SV=1	D8PXS6_SCHCO Putative uncharacterized protein OS=Schizophyllum commune H4-8 GN=SCHCODRAFT_84866 PE=4 SV=1	hypothetical protein SCHCODRAFT_84866 [Schizophyllum commune H4-8]	IPR005834; Haloacid dehalogenase-like hydrolase IPR006402; HAD-superfamily hydrolase, subfamily IA, variant 3 IPR023198; Phosphoglycolate phosphatase, domain 2 IPR023214; HAD-like domain	GO:0003824; catalytic activity; Molecular Function GO:0008152; metabolic process; Biological Process GO:0016787; hydrolase activity; Molecular Function
G_lucidum_10007618	PF00538.13;	NA	NA	NA	B0D395_LACBS Predicted protein OS=Laccaria bicolor (strain S238N-H82) GN=LACBIDRAFT_315821 PE=3 SV=1	predicted protein [Laccaria bicolor S238N-H82]	IPR005818; Histone H1/H5 IPR011991; Winged helix-turn-helix transcription repressor DNA-binding	GO:0000786; nucleosome; Cellular Component GO:0003677; DNA binding; Molecular Function GO:0005634; nucleus; Cellular Component GO:0006334; nucleosome assembly; Biological Process
G_lucidum_10007619	PF01042.15;	K07567 tdcF TdcF protein -- Unclassified; Genetic Information Processing; Translation proteins	COG0251 Putative translation initiation inhibitor, yjgF family J Translation, ribosomal structure and biogenesis ;	Y1251_PYRAB RutC family protein PYRAB12510 OS=Pyrococcus abyssi GN=PYRAB12510 PE=3 SV=1	A8N2W8_COPC7 Putative uncharacterized protein OS=Coprinopsis cinerea (strain Okayama-7 / 130 / FGSC 9003) GN=CC1G_06603 PE=4 SV=1	hypothetical protein CC1G_06603 [Coprinopsis cinerea okayama7#130]	IPR006175; Endoribonuclease L-PSP IPR013813; Endoribonuclease L-PSP/chorismate mutase-like	NA
G_lucidum_10007620	PF05903.8;PF00085.14;PF08324.5;	K01227 E3.2.1.96 mannosyl-glycoprotein endo-beta-N-acetylglucosaminidase 3.2.1.96 Metabolism; Glycan Biosynthesis and Metabolism; Other glycan degradation [PATH:ko00511]	NA	PPDE2_XENLA PPPDE peptidase domain-containing protein 2 OS=Xenopus laevis GN=pppde2 PE=2 SV=1	B0CX44_LACBS Predicted protein OS=Laccaria bicolor (strain S238N-H82) GN=LACBIDRAFT_188295 PE=4 SV=1	predicted protein [Laccaria bicolor S238N-H82]	IPR008580; Domain of unknown function DUF862, eukaryotic IPR012335; Thioredoxin fold IPR012336; Thioredoxin-like fold IPR013535; PUL IPR013766; Thioredoxin domain IPR017936; Thioredoxin-like IPR017937; Thioredoxin, conserved site	GO:0045454; cell redox homeostasis; Biological Process
G_lucidum_10007621	PF00755.1;	K00624 E2.3.1.7 carnitine O-acetyltransferase 2.3.1.7 Cellular Processes; Transport and Catabolism; Peroxisome [PATH:ko04146]	NA	CACP_CANTR Carnitine O-acetyltransferase, mitochondrial OS=Candida tropicalis GN=CAT2 PE=3 SV=1	D8PXF4_SCHCO Putative uncharacterized protein OS=Schizophyllum commune H4-8 GN=SCHCODRAFT_15006 PE=3 SV=1	hypothetical protein SCHCODRAFT_15006 [Schizophyllum commune H4-8]	IPR000542; Acyltransferase ChoActase/COT/CPT	GO:0008415; acyltransferase activity; Molecular Function
G_lucidum_10007622	NA	NA	NA	NA	B8PME9_POSPM Predicted protein OS=Postia placenta (strain ATCC 44394 / Madison 698-R) GN=POSPLDRAFT_92973 PE=4 SV=1	predicted protein [Postia placenta Mad-698-R]	NA	NA
G_lucidum_10007623	NA	NA	NA	NA	D8Q029_SCHCO Putative uncharacterized protein (Fragment) OS=Schizophyllum commune H4-8 GN=SCHCODRAFT_66702 PE=4 SV=1	hypothetical protein SCHCODRAFT_66702 [Schizophyllum commune H4-8]	NA	NA
G_lucidum_10007624	NA	NA	NA	NA	A8NQR6_COPC7 Putative uncharacterized protein OS=Coprinopsis cinerea (strain Okayama-7 / 130 / FGSC 9003) GN=CC1G_03444 PE=4 SV=1	hypothetical protein CC1G_03444 [Coprinopsis cinerea okayama7#130]	NA	NA
G_lucidum_10007625	NA	NA	NA	NA	NA	NA	NA	NA
G_lucidum_10007626	PF01841.1;PF10404.3;PF10403.3;PF03835.1;PF10405.3;	K10838 XPC xeroderma pigmentosum group C-complementing protein -- Genetic Information Processing; Replication and Repair; Nucleotide excision repair [PATH:ko03420] Genetic Information Processing; Replication and Repair; DNA repair and recombination proteins [BR:ko03400]	COG5535 DNA repair protein RAD4 L Replication, recombination and repair ;	RHP42_SCHPO DNA repair protein rhp42 OS=Schizosaccharomyces pombe GN=rhp42 PE=2 SV=1	B0CZ38_LACBS Predicted protein OS=Laccaria bicolor (strain S238N-H82) GN=LACBIDRAFT_312109 PE=4 SV=1	predicted protein [Laccaria bicolor S238N-H82]	IPR002931; Transglutaminase-like IPR004583; DNA repair protein Rad4 IPR018325; DNA repair protein Rad4, transglutaminase-like domain IPR018326; DNA repair protein Rad4, DNA-binding domain 1 IPR018327; DNA repair protein Rad4, DNA-binding domain 2 IPR018328; DNA repair protein Rad4, DNA-binding domain 3	GO:0003684; damaged DNA binding; Molecular Function GO:0005634; nucleus; Cellular Component GO:0006289; nucleotide-excision repair; Biological Process
G_lucidum_10007627	PF08704.4;	K07442 E2.1.1.36, GCD14 tRNA (adenine-N1-)-methyltransferase 2.1.1.36 Unclassified; Genetic Information Processing; Translation proteins	COG2519 tRNA(1-methyladenosine) methyltransferase and related methyltransferases J Translation, ribosomal structure and biogenesis ;	TRM61_CRYNE tRNA (adenine-N(1)-)-methyltransferase catalytic subunit TRM61 OS=Cryptococcus neoformans GN=TRM61 PE=3 SV=1	A8NQG5_COPC7 GCD14 OS=Coprinopsis cinerea (strain Okayama-7 / 130 / FGSC 9003) GN=CC1G_13077 PE=4 SV=1	GCD14 [Coprinopsis cinerea okayama7#130]	IPR014816; tRNA methyltransferase complex GCD14 subunit	GO:0016429; tRNA (adenine-N1-)-methyltransferase activity; Molecular Function GO:0030488; tRNA methylation; Biological Process
G_lucidum_10007628	PF08447.5;	NA	NA	NA	B0CZ39_LACBS Predicted protein OS=Laccaria bicolor (strain S238N-H82) GN=LACBIDRAFT_312111 PE=4 SV=1	predicted protein [Laccaria bicolor S238N-H82]	IPR000014; PAS IPR013655; PAS fold-3	GO:0004871; signal transducer activity; Molecular Function GO:0005515; protein binding; Molecular Function GO:0007165; signal transduction; Biological Process
G_lucidum_10007629	NA	NA	NA	NA	A8NM72_COPC7 Putative uncharacterized protein OS=Coprinopsis cinerea (strain Okayama-7 / 130 / FGSC 9003) GN=CC1G_09783 PE=4 SV=2	hypothetical protein CC1G_09783 [Coprinopsis cinerea okayama7#130]	NA	NA
G_lucidum_10007630	PF02776.12;PF02775.15;PF00205.16;	K01568 E4.1.1.1, pdc pyruvate decarboxylase 4.1.1.1 Metabolism; Carbohydrate Metabolism; Glycolysis / Gluconeogenesis [PATH:ko00010]	COG3961 Pyruvate decarboxylase and related thiamine pyrophosphate-requiring enzymes GHR Carbohydrate transport and metabolism ; Coenzyme transport and metabolism ; General function prediction only ;	PDC_ASPFU Pyruvate decarboxylase OS=Aspergillus fumigatus GN=pdcA PE=3 SV=1	D8Q4G9_SCHCO Putative uncharacterized protein OS=Schizophyllum commune H4-8 GN=SCHCODRAFT_76560 PE=3 SV=1	hypothetical protein SCHCODRAFT_76560 [Schizophyllum commune H4-8]	IPR011766; Thiamine pyrophosphate enzyme, C-terminal TPP-binding IPR012000; Thiamine pyrophosphate enzyme, central domain IPR012001; Thiamine pyrophosphate enzyme, N-terminal TPP-binding domain IPR012110; Pyruvate decarboxylase/indolepyruvate decarboxylase	GO:0000287; magnesium ion binding; Molecular Function GO:0003824; catalytic activity; Molecular Function GO:0016831; carboxy-lyase activity; Molecular Function GO:0030976; thiamin pyrophosphate binding; Molecular Function
G_lucidum_10007631	NA	NA	NA	NA	B0CZ06_LACBS Predicted protein OS=Laccaria bicolor (strain S238N-H82) GN=LACBIDRAFT_312068 PE=4 SV=1	predicted protein [Laccaria bicolor S238N-H82]	NA	NA
G_lucidum_10007632	NA	NA	NA	NA	NA	NA	NA	NA
G_lucidum_10007633	NA	NA	NA	NA	B8PKH6_POSPM Predicted protein OS=Postia placenta (strain ATCC 44394 / Madison 698-R) GN=POSPLDRAFT_102268 PE=4 SV=1	predicted protein [Postia placenta Mad-698-R]	NA	NA
G_lucidum_10007634	PF00018.22;	NA	NA	NA	B8PKH8_POSPM Predicted protein OS=Postia placenta (strain ATCC 44394 / Madison 698-R) GN=POSPLDRAFT_102270 PE=4 SV=1	predicted protein [Postia placenta Mad-698-R]	IPR001452; Src homology-3 domain	GO:0005515; protein binding; Molecular Function
G_lucidum_10007635	PF05964.8;PF05965.8;	K09188 MLL3 myeloid/lymphoid or mixed-lineage leukemia protein 3 -- Genetic Information Processing; Transcription; Transcription factors [BR:ko03000] Genetic Information Processing; Replication and Repair; Chromosome [BR:ko03036]	NA	TBRG1_MOUSE Transforming growth factor beta regulator 1 OS=Mus musculus GN=Tbrg1 PE=1 SV=2	B8PKH9_POSPM Predicted protein OS=Postia placenta (strain ATCC 44394 / Madison 698-R) GN=POSPLDRAFT_102271 PE=4 SV=1	predicted protein [Postia placenta Mad-698-R]	IPR003888; FY-rich, N-terminal IPR003889; FY-rich, C-terminal IPR018516; FY-rich, C-terminal subgroup IPR018518; FY-rich, N-terminal subgroup	GO:0003677; DNA binding; Molecular Function GO:0005634; nucleus; Cellular Component
G_lucidum_10007636	NA	K01463 E3.5.1.- -- -- Unclassified; Metabolism; Metabolism of cofactors and vitamins	COG0388 Predicted amidohydrolase R General function prediction only ;	NTA1_SCHPO Protein N-terminal amidase OS=Schizosaccharomyces pombe GN=nta1 PE=2 SV=1	B0CZ30_LACBS Predicted protein OS=Laccaria bicolor (strain S238N-H82) GN=LACBIDRAFT_312099 PE=4 SV=1	predicted protein [Laccaria bicolor S238N-H82]	IPR003010; Nitrilase/cyanide hydratase and apolipoprotein N-acyltransferase	GO:0006807; nitrogen compound metabolic process; Biological Process GO:0016810; hydrolase activity, acting on carbon-nitrogen (but not peptide) bonds; Molecular Function
G_lucidum_10007637	PF04739.9;	K07199 PRKAB 5'-AMP-activated protein kinase, regulatory beta subunit -- Organismal Systems; Endocrine System; Insulin signaling pathway [PATH:ko04910] Organismal Systems; Endocrine System; Adipocytokine signaling pathway [PATH:ko04920] Human Diseases; Cardiovascular Diseases; Hypertrophic cardiomyopathy (HCM) [PATH:ko05410]	NA	AAKB1_MOUSE 5'-AMP-activated protein kinase subunit beta-1 OS=Mus musculus GN=Prkab1 PE=1 SV=2	D8PXT4_SCHCO Putative uncharacterized protein OS=Schizophyllum commune H4-8 GN=SCHCODRAFT_256647 PE=4 SV=1	hypothetical protein SCHCODRAFT_256647 [Schizophyllum commune H4-8]	IPR006828; 5-AMP-activated protein kinase, beta subunit, interaction domain	GO:0005515; protein binding; Molecular Function
G_lucidum_10007638	PF00702.1;	K01112 E3.1.3.- -- -- Metabolism; Carbohydrate Metabolism; Fructose and mannose metabolism [PATH:ko00051] Metabolism; Metabolism of Cofactors and Vitamins; Thiamine metabolism [PATH:ko00730] Metabolism; Metabolism of Cofactors and Vitamins; Riboflavin metabolism [PATH:ko00740]	COG0637 Predicted phosphatase/phosphohexomutase R General function prediction only ;	DOG2_YEAST 2-deoxyglucose-6-phosphate phosphatase 2 OS=Saccharomyces cerevisiae GN=DOG2 PE=1 SV=1	D8PXS6_SCHCO Putative uncharacterized protein OS=Schizophyllum commune H4-8 GN=SCHCODRAFT_84866 PE=4 SV=1	hypothetical protein SCHCODRAFT_84866 [Schizophyllum commune H4-8]	IPR005834; Haloacid dehalogenase-like hydrolase IPR006402; HAD-superfamily hydrolase, subfamily IA, variant 3 IPR023198; Phosphoglycolate phosphatase, domain 2 IPR023214; HAD-like domain	GO:0003824; catalytic activity; Molecular Function GO:0008152; metabolic process; Biological Process GO:0016787; hydrolase activity; Molecular Function
G_lucidum_10007639	PF03936.10;	K12250 E4.2.3.7 pentalenene synthase 4.2.3.7 Metabolism; Metabolism of Terpenoids and Polyketides; Sesquiterpenoid biosynthesis [PATH:ko00909]	NA	PTLS_STRS3 Pentalenene synthase OS=Streptomyces sp. (strain UC5319) PE=1 SV=4	B8PHT3_POSPM Predicted protein OS=Postia placenta (strain ATCC 44394 / Madison 698-R) GN=POSPLDRAFT_101549 PE=4 SV=1	predicted protein [Postia placenta Mad-698-R]	IPR005630; Terpene synthase, metal-binding domain IPR008949; Terpenoid synthase	GO:0000287; magnesium ion binding; Molecular Function GO:0016829; lyase activity; Molecular Function
G_lucidum_10007640	PF01090.13;	K02966 RP-S19e, RPS19 small subunit ribosomal protein S19e -- Genetic Information Processing; Translation; Ribosome [PATH:ko03010] Genetic Information Processing; Translation; Ribosome [BR:ko03011]	COG2238 Ribosomal protein S19E (S16A) J Translation, ribosomal structure and biogenesis ;	RS19A_SCHPO 40S ribosomal protein S19-A OS=Schizosaccharomyces pombe GN=rps19a PE=2 SV=1	B0CV79_LACBS Predicted protein OS=Laccaria bicolor (strain S238N-H82) GN=LACBIDRAFT_292507 PE=4 SV=1	predicted protein [Laccaria bicolor S238N-H82]	IPR001266; Ribosomal protein S19e	GO:0003735; structural constituent of ribosome; Molecular Function GO:0005622; intracellular; Cellular Component GO:0005840; ribosome; Cellular Component GO:0006412; translation; Biological Process
G_lucidum_10007641	PF00487.18;	K10256 FAD2 omega-6 fatty acid desaturase (delta-12 desaturase) 1.14.19.- Metabolism; Lipid Metabolism; Biosynthesis of unsaturated fatty acids [PATH:ko01040] Metabolism; Lipid Metabolism; Lipid biosynthesis proteins [BR:ko01004]	COG3239 Fatty acid desaturase I Lipid transport and metabolism ;	FAD12_MORAP Delta(12) fatty acid desaturase OS=Mortierella alpina PE=2 SV=2	D4Q8S6_CERSU Delta12-fatty acid desaturase OS=Ceriporiopsis subvermispora GN=Cs-fad2 PE=4 SV=1	delta12-fatty acid desaturase [Ceriporiopsis subvermispora]	IPR005804; Fatty acid desaturase, type 1	GO:0006629; lipid metabolic process; Biological Process GO:0016491; oxidoreductase activity; Molecular Function GO:0055114; oxidation-reduction process; Biological Process
G_lucidum_10007642	PF00069.19;	K00924 E2.7.1.- -- -- Unclassified; Cellular Processes and Signaling; Signal transduction mechanisms	NA	KC1D_ARATH Casein kinase I isoform delta-like OS=Arabidopsis thaliana GN=At4g26100 PE=2 SV=2	D8Q002_SCHCO Putative uncharacterized protein OS=Schizophyllum commune H4-8 GN=SCHCODRAFT_75339 PE=4 SV=1	hypothetical protein SCHCODRAFT_75339 [Schizophyllum commune H4-8]	IPR000719; Protein kinase, catalytic domain IPR002290; Serine/threonine-protein kinase domain IPR011009; Protein kinase-like domain IPR017441; Protein kinase, ATP binding site IPR017442; Serine/threonine-protein kinase-like domain	GO:0004672; protein kinase activity; Molecular Function GO:0004674; protein serine/threonine kinase activity; Molecular Function GO:0005524; ATP binding; Molecular Function GO:0006468; protein phosphorylation; Biological Process
G_lucidum_10007643	PF02055.10;	K01201 E3.2.1.45, GBA, srfJ glucosylceramidase 3.2.1.45 Metabolism; Lipid Metabolism; Sphingolipid metabolism [PATH:ko00600] Metabolism; Glycan Biosynthesis and Metabolism; Other glycan degradation [PATH:ko00511] Cellular Processes; Transport and Catabolism; Lysosome [PATH:ko04142]	COG5520 O-Glycosyl hydrolase M Cell wall/membrane/envelope biogenesis ;	NEG1_NEUCR Endo-1,6-beta-D-glucanase OS=Neurospora crassa GN=neg-1 PE=1 SV=2	B8PGR0_POSPM Putative uncharacterized protein OS=Postia placenta (strain ATCC 44394 / Madison 698-R) GN=POSPLDRAFT_135050 PE=4 SV=1	hypothetical protein POSPLDRAFT_135050 [Postia placenta Mad-698-R]	IPR001139; Glycoside hydrolase, family 30 IPR013781; Glycoside hydrolase, subgroup, catalytic core IPR017853; Glycoside hydrolase, catalytic core	GO:0003824; catalytic activity; Molecular Function GO:0004348; glucosylceramidase activity; Molecular Function GO:0005764; lysosome; Cellular Component GO:0005975; carbohydrate metabolic process; Biological Process GO:0006665; sphingolipid metabolic process; Biological Process GO:0007040; lysosome organization; Biological Process GO:0043169; cation binding; Molecular Function
G_lucidum_10007644	PF04146.9;	NA	NA	YTDC2_MOUSE Probable ATP-dependent RNA helicase YTHDC2 OS=Mus musculus GN=Ythdc2 PE=2 SV=1	B0CZ01_LACBS Predicted protein OS=Laccaria bicolor (strain S238N-H82) GN=LACBIDRAFT_312062 PE=4 SV=1	predicted protein [Laccaria bicolor S238N-H82]	IPR000504; RNA recognition motif domain IPR007275; YTH domain IPR012677; Nucleotide-binding, alpha-beta plait	GO:0000166; nucleotide binding; Molecular Function GO:0003676; nucleic acid binding; Molecular Function
G_lucidum_10007645	PF00651.25;	NA	NA	NA	D8PXT5_SCHCO Putative uncharacterized protein (Fragment) OS=Schizophyllum commune H4-8 GN=SCHCODRAFT_107292 PE=4 SV=1	hypothetical protein SCHCODRAFT_107292 [Schizophyllum commune H4-8]	IPR000210; BTB/POZ-like IPR011333; BTB/POZ fold IPR013069; BTB/POZ	GO:0005515; protein binding; Molecular Function
G_lucidum_10007646	PF00400.26;	K03246 eIF-32, EIF3S2 translation initiation factor eIF-3 subunit 2 -- Genetic Information Processing; Translation; Translation factors [BR:ko03012]	NA	EIF3I_CRYNE Eukaryotic translation initiation factor 3 subunit I OS=Cryptococcus neoformans GN=TIF34 PE=3 SV=1	D8PXS3_SCHCO Putative uncharacterized protein OS=Schizophyllum commune H4-8 GN=SCHCODRAFT_66951 PE=4 SV=1	hypothetical protein SCHCODRAFT_66951 [Schizophyllum commune H4-8]	IPR001680; WD40 repeat IPR011046; WD40 repeat-like-containing domain IPR015943; WD40/YVTN repeat-like-containing domain IPR017986; WD40-repeat-containing domain IPR019781; WD40 repeat, subgroup IPR019782; WD40 repeat 2	GO:0005515; protein binding; Molecular Function
G_lucidum_10007647	PF00962.16;	K01490 E3.5.4.6, AMPD AMP deaminase 3.5.4.6 Metabolism; Nucleotide Metabolism; Purine metabolism [PATH:ko00230]	COG1816 Adenosine deaminase F Nucleotide transport and metabolism ;	AMPD_YEAST AMP deaminase OS=Saccharomyces cerevisiae GN=AMD1 PE=1 SV=2	D8PXT3_SCHCO Putative uncharacterized protein OS=Schizophyllum commune H4-8 GN=SCHCODRAFT_66959 PE=4 SV=1	hypothetical protein SCHCODRAFT_66959 [Schizophyllum commune H4-8]	IPR001365; Adenosine/AMP deaminase IPR006329; AMP deaminase IPR006650; Adenosine/AMP deaminase active site	GO:0003876; AMP deaminase activity; Molecular Function GO:0009168; purine ribonucleoside monophosphate biosynthetic process; Biological Process GO:0019239; deaminase activity; Molecular Function
G_lucidum_10007648	NA	NA	NA	NA	B0E161_LACBS Predicted protein OS=Laccaria bicolor (strain S238N-H82) GN=LACBIDRAFT_316568 PE=4 SV=1	predicted protein [Laccaria bicolor S238N-H82]	NA	NA
G_lucidum_10007649	PF12937.1;	NA	NA	NA	B0CV78_LACBS Predicted protein (Fragment) OS=Laccaria bicolor (strain S238N-H82) GN=LACBIDRAFT_322822 PE=4 SV=1	predicted protein [Laccaria bicolor S238N-H82]	IPR022364; F-box domain, Skp2-like	NA
G_lucidum_10007650	PF02867.1;PF03477.10;PF00317.15;	K10807 RRM1 ribonucleoside-diphosphate reductase subunit M1 1.17.4.1 Metabolism; Nucleotide Metabolism; Purine metabolism [PATH:ko00230] Metabolism; Nucleotide Metabolism; Pyrimidine metabolism [PATH:ko00240] Metabolism; Metabolism of Other Amino Acids; Glutathione metabolism [PATH:ko00480] Genetic Information Processing; Replication and Repair; DNA repair and recombination proteins [BR:ko03400]	COG0209 Ribonucleotide reductase, alpha subunit F Nucleotide transport and metabolism ;	RIR1_NEUCR Ribonucleoside-diphosphate reductase large chain OS=Neurospora crassa GN=rnr-1 PE=1 SV=2	A8NR17_COPC7 Ribonucleoside-diphosphate reductase OS=Coprinopsis cinerea (strain Okayama-7 / 130 / FGSC 9003) GN=CC1G_03383 PE=3 SV=2	hypothetical protein CC1G_03383 [Coprinopsis cinerea okayama7#130]	IPR000788; Ribonucleotide reductase large subunit, C-terminal IPR005144; ATP-cone IPR008926; Ribonucleotide reductase R1 subunit, N-terminal IPR013346; Ribonucleoside-diphosphate reductase, alpha subunit IPR013509; Ribonucleotide reductase large subunit, N-terminal	GO:0004748; ribonucleoside-diphosphate reductase activity; Molecular Function GO:0005524; ATP binding; Molecular Function GO:0005971; ribonucleoside-diphosphate reductase complex; Cellular Component GO:0006260; DNA replication; Biological Process GO:0055114; oxidation-reduction process; Biological Process
G_lucidum_10007651	NA	NA	NA	NA	B0CWU4_LACBS Predicted protein OS=Laccaria bicolor (strain S238N-H82) GN=LACBIDRAFT_308634 PE=4 SV=1	predicted protein [Laccaria bicolor S238N-H82]	NA	NA
G_lucidum_10007652	PF03781.10;PF10017.3;	NA	COG1262 Uncharacterized conserved protein S Function unknown ;	MU158_SCHPO Meiotically up-regulated gene 158 protein OS=Schizosaccharomyces pombe GN=mug158 PE=1 SV=4	A8NRV0_COPC7 DUF323 domain-containing protein OS=Coprinopsis cinerea (strain Okayama-7 / 130 / FGSC 9003) GN=CC1G_02949 PE=4 SV=1	DUF323 domain-containing protein [Coprinopsis cinerea okayama7#130]	IPR005532; Sulphatase-modifying factor IPR016187; C-type lectin fold IPR017805; SAM-dependent methyltransferase, EsaF-type, putative IPR019257; Methyltransferase, domain of unknown function DUF2260	GO:0005488; binding; Molecular Function
G_lucidum_10007653	PF00026.17;	K01382 CTSE cathepsin E 3.4.23.34 Metabolism; Enzyme Families; Peptidases [BR:ko01002] Cellular Processes; Transport and Catabolism; Lysosome [PATH:ko04142]	NA	CARP_IRPLA Polyporopepsin OS=Irpex lacteus PE=1 SV=1	D8PMQ4_SCHCO Putative uncharacterized protein (Fragment) OS=Schizophyllum commune H4-8 GN=SCHCODRAFT_48367 PE=3 SV=1	hypothetical protein SCHCODRAFT_48367 [Schizophyllum commune H4-8]	IPR001461; Peptidase A1 IPR001969; Peptidase aspartic, active site IPR009007; Peptidase aspartic, catalytic IPR021109; Peptidase aspartic	GO:0004190; aspartic-type endopeptidase activity; Molecular Function GO:0006508; proteolysis; Biological Process
G_lucidum_10007654	NA	NA	NA	NA	B8PM48_POSPM Predicted protein OS=Postia placenta (strain ATCC 44394 / Madison 698-R) GN=POSPLDRAFT_96826 PE=4 SV=1	predicted protein [Postia placenta Mad-698-R]	IPR000210; BTB/POZ-like IPR011333; BTB/POZ fold	GO:0005515; protein binding; Molecular Function
G_lucidum_10007655	NA	NA	NA	NA	B8PH23_POSPM Predicted protein OS=Postia placenta (strain ATCC 44394 / Madison 698-R) GN=POSPLDRAFT_95459 PE=4 SV=1	predicted protein [Postia placenta Mad-698-R]	NA	NA
G_lucidum_10007656	NA	NA	NA	NA	NA	NA	NA	NA
G_lucidum_10007657	NA	K11800 WDR22, BCRP2 WD repeat-containing protein 22 -- Genetic Information Processing; Folding, Sorting and Degradation; Ubiquitin system [BR:ko04121]	NA	DCAF5_MOUSE DDB1- and CUL4-associated factor 5 OS=Mus musculus GN=Dcaf5 PE=1 SV=2	B0CVL7_LACBS Predicted protein OS=Laccaria bicolor (strain S238N-H82) GN=LACBIDRAFT_309123 PE=4 SV=1	predicted protein [Laccaria bicolor S238N-H82]	IPR001680; WD40 repeat IPR011046; WD40 repeat-like-containing domain IPR015943; WD40/YVTN repeat-like-containing domain IPR019781; WD40 repeat, subgroup	GO:0005515; protein binding; Molecular Function
G_lucidum_10007658	PF00626.16;	K05768 GSN gelsolin -- Cellular Processes; Cell Motility; Regulation of actin cytoskeleton [PATH:ko04810] Cellular Processes; Cell Motility; Cytoskeleton proteins [BR:ko04812] Organismal Systems; Immune System; Fc gamma R-mediated phagocytosis [PATH:ko04666]	NA	SEVE_DICDI Severin OS=Dictyostelium discoideum GN=sevA PE=1 SV=1	D8PXX0_SCHCO Putative uncharacterized protein OS=Schizophyllum commune H4-8 GN=SCHCODRAFT_256659 PE=4 SV=1	hypothetical protein SCHCODRAFT_256659 [Schizophyllum commune H4-8]	IPR007122; Gelsolin IPR007123; Gelsolin domain	GO:0003779; actin binding; Molecular Function
G_lucidum_10007659	PF00248.15;	K00100 E1.1.1.- -- -- Metabolism; Carbohydrate Metabolism; Fructose and mannose metabolism [PATH:ko00051] Metabolism; Carbohydrate Metabolism; Butanoate metabolism [PATH:ko00650] Metabolism; Lipid Metabolism; Linoleic acid metabolism [PATH:ko00591] Metabolism; Xenobiotics Biodegradation and Metabolism; Tetrachloroethene degradation [PATH:ko00625] Metabolism; Xenobiotics Biodegradation and Metabol…	COG0656 Aldo/keto reductases, related to diketogulonate reductase R General function prediction only ;	I3ACR_SCHPO NAD/NADP-dependent indole-3-acetaldehyde reductase OS=Schizosaccharomyces pombe GN=SPAC19G12.09 PE=1 SV=1	B8PI47_POSPM Predicted protein OS=Postia placenta (strain ATCC 44394 / Madison 698-R) GN=POSPLDRAFT_100317 PE=4 SV=1	predicted protein [Postia placenta Mad-698-R]	IPR001395; Aldo/keto reductase IPR018170; Aldo/keto reductase, conserved site IPR020471; Aldo/keto reductase subgroup IPR023210; NADP-dependent oxidoreductase domain	GO:0016491; oxidoreductase activity; Molecular Function GO:0055114; oxidation-reduction process; Biological Process
G_lucidum_10007660	NA	NA	NA	NA	B8PH28_POSPM Predicted protein OS=Postia placenta (strain ATCC 44394 / Madison 698-R) GN=POSPLDRAFT_95466 PE=4 SV=1	predicted protein [Postia placenta Mad-698-R]	NA	NA
G_lucidum_10007661	NA	K00540 E1.-.-.- -- -- Unclassified; Metabolism; Others	COG1028 Dehydrogenases with different specificities (related to short-chain alcohol dehydrogenases) IQR Lipid transport and metabolism ; Secondary metabolites biosynthesis, transport and catabolism ; General function prediction only ;	CSGA_MYXXA C-factor OS=Myxococcus xanthus GN=csgA PE=1 SV=1	B8P358_POSPM Predicted protein OS=Postia placenta (strain ATCC 44394 / Madison 698-R) GN=POSPLDRAFT_88304 PE=4 SV=1	predicted protein [Postia placenta Mad-698-R]	IPR002198; Short-chain dehydrogenase/reductase SDR IPR016040; NAD(P)-binding domain	GO:0003824; catalytic activity; Molecular Function GO:0005488; binding; Molecular Function GO:0008152; metabolic process; Biological Process GO:0016491; oxidoreductase activity; Molecular Function
G_lucidum_10007662	PF01126.14;	K00510 E1.14.99.3 heme oxygenase 1.14.99.3 Metabolism; Metabolism of Cofactors and Vitamins; Porphyrin and chlorophyll metabolism [PATH:ko00860]	COG5398 Heme oxygenase P Inorganic ion transport and metabolism ;	HMOX1_BOVIN Heme oxygenase 1 OS=Bos taurus GN=HMOX1 PE=1 SV=1	B0CVJ6_LACBS Predicted protein OS=Laccaria bicolor (strain S238N-H82) GN=LACBIDRAFT_322919 PE=4 SV=1	heme oxygenase [Taiwanofungus camphoratus]	IPR002051; Haem oxygenase IPR016053; Haem oxygenase-like IPR016084; Haem oxygenase-like, multi-helical	GO:0004392; heme oxygenase (decyclizing) activity; Molecular Function GO:0006788; heme oxidation; Biological Process GO:0055114; oxidation-reduction process; Biological Process
G_lucidum_10007663	PF00642.18;	NA	NA	NA	NA	NA	IPR000571; Zinc finger, CCCH-type	GO:0003676; nucleic acid binding; Molecular Function GO:0008270; zinc ion binding; Molecular Function
G_lucidum_10007664	PF00097.19;PF02225.16;	K10629 RNF128, GRAIL E3 ubiquitin-protein ligase RNF128 6.3.2.19 Genetic Information Processing; Folding, Sorting and Degradation; Ubiquitin system [BR:ko04121]	COG5540 RING-finger-containing ubiquitin ligase O Posttranslational modification, protein turnover, chaperones ;	YDM9_SCHPO Uncharacterized RING finger protein C57A7.09 OS=Schizosaccharomyces pombe GN=SPAC57A7.09 PE=1 SV=1	B0CVJ3_LACBS Predicted protein OS=Laccaria bicolor (strain S238N-H82) GN=LACBIDRAFT_309098 PE=4 SV=1	predicted protein [Laccaria bicolor S238N-H82]	IPR001841; Zinc finger, RING-type IPR003137; Protease-associated domain, PA IPR013083; Zinc finger, RING/FYVE/PHD-type IPR018957; Zinc finger, C3HC4 RING-type	GO:0005515; protein binding; Molecular Function GO:0008270; zinc ion binding; Molecular Function
G_lucidum_10007665	NA	NA	NA	NA	B0CX42_LACBS Predicted protein OS=Laccaria bicolor (strain S238N-H82) GN=LACBIDRAFT_322669 PE=4 SV=1	predicted protein [Laccaria bicolor S238N-H82]	NA	NA
G_lucidum_10007666	NA	NA	NA	NA	B0CX25_LACBS Predicted protein OS=Laccaria bicolor (strain S238N-H82) GN=LACBIDRAFT_308731 PE=4 SV=1	predicted protein [Laccaria bicolor S238N-H82]	NA	NA
G_lucidum_10007667	PF02055.10;	K01201 E3.2.1.45, GBA, srfJ glucosylceramidase 3.2.1.45 Metabolism; Lipid Metabolism; Sphingolipid metabolism [PATH:ko00600] Metabolism; Glycan Biosynthesis and Metabolism; Other glycan degradation [PATH:ko00511] Cellular Processes; Transport and Catabolism; Lysosome [PATH:ko04142]	COG5520 O-Glycosyl hydrolase M Cell wall/membrane/envelope biogenesis ;	NEG1_NEUCR Endo-1,6-beta-D-glucanase OS=Neurospora crassa GN=neg-1 PE=1 SV=2	B8PGR0_POSPM Putative uncharacterized protein OS=Postia placenta (strain ATCC 44394 / Madison 698-R) GN=POSPLDRAFT_135050 PE=4 SV=1	hypothetical protein POSPLDRAFT_135050 [Postia placenta Mad-698-R]	IPR001139; Glycoside hydrolase, family 30 IPR013781; Glycoside hydrolase, subgroup, catalytic core IPR017853; Glycoside hydrolase, catalytic core	GO:0003824; catalytic activity; Molecular Function GO:0004348; glucosylceramidase activity; Molecular Function GO:0005764; lysosome; Cellular Component GO:0005975; carbohydrate metabolic process; Biological Process GO:0006665; sphingolipid metabolic process; Biological Process GO:0007040; lysosome organization; Biological Process GO:0043169; cation binding; Molecular Function
G_lucidum_10007668	NA	NA	NA	NA	B0CVL9_LACBS Predicted protein OS=Laccaria bicolor (strain S238N-H82) GN=LACBIDRAFT_292561 PE=4 SV=1	predicted protein [Laccaria bicolor S238N-H82]	NA	NA
G_lucidum_10007669	NA	NA	NA	NA	B0CVL9_LACBS Predicted protein OS=Laccaria bicolor (strain S238N-H82) GN=LACBIDRAFT_292561 PE=4 SV=1	predicted protein [Laccaria bicolor S238N-H82]	NA	NA
G_lucidum_10007670	PF02515.11;	K07749 E2.8.3.16 formyl-CoA transferase 2.8.3.16 Unclassified; Metabolism; Energy metabolism	COG1804 Predicted acyl-CoA transferases/carnitine dehydratase C Energy production and conversion ;	CG010_HUMAN CaiB/baiF CoA-transferase family protein C7orf10 OS=Homo sapiens GN=C7orf10 PE=1 SV=2	D6RP71_COPC7 CAIB/BAIF family enzyme OS=Coprinopsis cinerea (strain Okayama-7 / 130 / FGSC 9003) GN=CC1G_15019 PE=4 SV=1	CAIB/BAIF family enzyme [Coprinopsis cinerea okayama7#130]	IPR003673; CoA-transferase family III	GO:0003824; catalytic activity; Molecular Function GO:0008152; metabolic process; Biological Process
G_lucidum_10007671	NA	NA	NA	NA	B0DA80_LACBS Glycoside hydrolase family 79 protein OS=Laccaria bicolor (strain S238N-H82) GN=LACBIDRAFT_184692 PE=4 SV=1	glycoside hydrolase family 79 protein [Laccaria bicolor S238N-H82]	IPR017853; Glycoside hydrolase, catalytic core	NA
G_lucidum_10007672	PF09994.3;	NA	COG3673 Uncharacterized conserved protein S Function unknown ;	YEC3_YEAST Uncharacterized protein YEL023C OS=Saccharomyces cerevisiae GN=YEL023C PE=2 SV=1	B0CWW3_LACBS Predicted protein OS=Laccaria bicolor (strain S238N-H82) GN=LACBIDRAFT_308654 PE=4 SV=1	predicted protein [Laccaria bicolor S238N-H82]	IPR018712; Domain of unknown function DUF2235	NA
G_lucidum_10007673	PF08672.5;PF00888.16;	K03349 APC2 anaphase-promoting complex subunit 2 -- Genetic Information Processing; Folding, Sorting and Degradation; Ubiquitin mediated proteolysis [PATH:ko04120] Genetic Information Processing; Folding, Sorting and Degradation; Ubiquitin system [BR:ko04121] Genetic Information Processing; Replication and Repair; Chromosome [BR:ko03036] Cellular Processes; Cell Growth and Death; Cell cycle [PATH…	NA	ANC2_HUMAN Anaphase-promoting complex subunit 2 OS=Homo sapiens GN=ANAPC2 PE=1 SV=1	B8PA13_POSPM Predicted protein OS=Postia placenta (strain ATCC 44394 / Madison 698-R) GN=POSPLDRAFT_88677 PE=3 SV=1	predicted protein [Postia placenta Mad-698-R]	IPR001373; Cullin, N-terminal IPR011991; Winged helix-turn-helix transcription repressor DNA-binding IPR014786; Anaphase promoting complex subunit 2 IPR016158; Cullin homology	GO:0006511; ubiquitin-dependent protein catabolic process; Biological Process GO:0031461; cullin-RING ubiquitin ligase complex; Cellular Component GO:0031625; ubiquitin protein ligase binding; Molecular Function
G_lucidum_10007674	PF07859.7;	NA	NA	NA	B0CZ33_LACBS Predicted protein OS=Laccaria bicolor (strain S238N-H82) GN=LACBIDRAFT_312102 PE=4 SV=1	predicted protein [Laccaria bicolor S238N-H82]	IPR013094; Alpha/beta hydrolase fold-3	GO:0008152; metabolic process; Biological Process GO:0016787; hydrolase activity; Molecular Function
G_lucidum_10007675	PF02146.1;	K11121 SIR2 NAD-dependent histone deacetylase SIR2 3.5.1.- Genetic Information Processing; Replication and Repair; DNA replication proteins [BR:ko03032] Genetic Information Processing; Replication and Repair; Chromosome [BR:ko03036]	COG0846 NAD-dependent protein deacetylases, SIR2 family K Transcription ;	HST2_SCHPO NAD-dependent deacetylase hst2 OS=Schizosaccharomyces pombe GN=hst2 PE=2 SV=1	B8NZG8_POSPM Predicted protein (Fragment) OS=Postia placenta (strain ATCC 44394 / Madison 698-R) GN=POSPLDRAFT_23327 PE=4 SV=1	predicted protein [Postia placenta Mad-698-R]	IPR003000; NAD-dependent histone deacetylase, silent information regulator Sir2 IPR017328; NAD-dependent deacetylase sirtuin-2, eukaryota	GO:0006342; chromatin silencing; Biological Process GO:0006476; protein deacetylation; Biological Process GO:0008270; zinc ion binding; Molecular Function GO:0016811; hydrolase activity, acting on carbon-nitrogen (but not peptide) bonds, in linear amides; Molecular Function GO:0045449; regulation of transcription; Biological Process GO:0051287; NAD or NADH binding; Molecular Function GO:0070403; …
G_lucidum_10007676	PF02146.1;PF05577.6;	K11121 SIR2 NAD-dependent histone deacetylase SIR2 3.5.1.- Genetic Information Processing; Replication and Repair; DNA replication proteins [BR:ko03032] Genetic Information Processing; Replication and Repair; Chromosome [BR:ko03036]	COG0846 NAD-dependent protein deacetylases, SIR2 family K Transcription ;	HST2_SCHPO NAD-dependent deacetylase hst2 OS=Schizosaccharomyces pombe GN=hst2 PE=2 SV=1	D8PXE9_SCHCO Putative uncharacterized protein OS=Schizophyllum commune H4-8 GN=SCHCODRAFT_15001 PE=4 SV=1	hypothetical protein SCHCODRAFT_15001 [Schizophyllum commune H4-8]	IPR003000; NAD-dependent histone deacetylase, silent information regulator Sir2 IPR008758; Peptidase S28	GO:0006342; chromatin silencing; Biological Process GO:0006476; protein deacetylation; Biological Process GO:0006508; proteolysis; Biological Process GO:0008236; serine-type peptidase activity; Molecular Function GO:0008270; zinc ion binding; Molecular Function GO:0016811; hydrolase activity, acting on carbon-nitrogen (but not peptide) bonds, in linear amides; Molecular Function GO:0045449; regul…
G_lucidum_10007677	PF01753.12;	NA	NA	NA	B8NZG9_POSPM Predicted protein OS=Postia placenta (strain ATCC 44394 / Madison 698-R) GN=POSPLDRAFT_87698 PE=4 SV=1	predicted protein [Postia placenta Mad-698-R]	IPR002893; Zinc finger, MYND-type	GO:0008270; zinc ion binding; Molecular Function
G_lucidum_10007678	PF03853.9;	K12615 EDC3 enhancer of mRNA-decapping protein 3 -- Genetic Information Processing; Folding, Sorting and Degradation; RNA degradation [PATH:ko03018]	COG0062 Uncharacterized conserved protein S Function unknown ;	YJEFN_DROAN YjeF N-terminal domain-containing protein GF19489 OS=Drosophila ananassae GN=GF19489 PE=4 SV=1	B0CWV7_LACBS Predicted protein OS=Laccaria bicolor (strain S238N-H82) GN=LACBIDRAFT_245214 PE=4 SV=1	predicted protein [Laccaria bicolor S238N-H82]	IPR004443; YjeF-related protein, N-terminal	NA
G_lucidum_10007679	PF05460.7;	NA	NA	NA	B0CWV3_LACBS Predicted protein OS=Laccaria bicolor (strain S238N-H82) GN=LACBIDRAFT_292406 PE=4 SV=1	predicted protein [Laccaria bicolor S238N-H82]	IPR008721; Origin recognition complex, subunit 6	GO:0003677; DNA binding; Molecular Function GO:0005664; nuclear origin of replication recognition complex; Cellular Component GO:0006260; DNA replication; Biological Process
G_lucidum_10007680	PF05241.6;	K03844 ALG11 alpha-1,2-mannosyltransferase 2.4.1.- Metabolism; Glycan Biosynthesis and Metabolism; Glycosyltransferases [BR:ko01003] Metabolism; Glycan Biosynthesis and Metabolism; N-Glycan biosynthesis [PATH:ko00510]	NA	EBPL_MOUSE Emopamil-binding protein-like OS=Mus musculus GN=Ebpl PE=2 SV=1	D8PXG1_SCHCO Putative uncharacterized protein OS=Schizophyllum commune H4-8 GN=SCHCODRAFT_233609 PE=4 SV=1	hypothetical protein SCHCODRAFT_233609 [Schizophyllum commune H4-8]	IPR007905; Emopamil-binding	GO:0005783; endoplasmic reticulum; Cellular Component GO:0016021; integral to membrane; Cellular Component GO:0016125; sterol metabolic process; Biological Process GO:0047750; cholestenol delta-isomerase activity; Molecular Function
G_lucidum_10007681	PF01979.14;	K01487 E3.5.4.3, guaD guanine deaminase 3.5.4.3 Metabolism; Nucleotide Metabolism; Purine metabolism [PATH:ko00230]	COG0402 Cytosine deaminase and related metal-dependent hydrolases FR Nucleotide transport and metabolism ; General function prediction only ;	GUAD_DICDI Guanine deaminase OS=Dictyostelium discoideum GN=guaD PE=1 SV=1	D8PXI1_SCHCO Putative uncharacterized protein OS=Schizophyllum commune H4-8 GN=SCHCODRAFT_52752 PE=4 SV=1	hypothetical protein SCHCODRAFT_52752 [Schizophyllum commune H4-8]	IPR006680; Amidohydrolase 1 IPR014311; Guanine deaminase	GO:0008270; zinc ion binding; Molecular Function GO:0008892; guanine deaminase activity; Molecular Function GO:0016787; hydrolase activity; Molecular Function
G_lucidum_10007682	PF00651.25;	NA	NA	NA	B8NZH3_POSPM Predicted protein OS=Postia placenta (strain ATCC 44394 / Madison 698-R) GN=POSPLDRAFT_91468 PE=4 SV=1	predicted protein [Postia placenta Mad-698-R]	IPR000210; BTB/POZ-like IPR011333; BTB/POZ fold IPR013069; BTB/POZ	GO:0005515; protein binding; Molecular Function
G_lucidum_10007683	PF03164.8;	NA	NA	MON1_CRYNE Vacuolar fusion protein MON1 OS=Cryptococcus neoformans GN=MON1 PE=3 SV=1	B8PA08_POSPM Predicted protein OS=Postia placenta (strain ATCC 44394 / Madison 698-R) GN=POSPLDRAFT_95830 PE=4 SV=1	predicted protein [Postia placenta Mad-698-R]	IPR004353; Vacuolar fusion protein MON1	NA
G_lucidum_10007684	PF10408.3;PF00300.1;PF04564.9;	K10597 UBE4B, UFD2 ubiquitin conjugation factor E4 B 6.3.2.19 Genetic Information Processing; Folding, Sorting and Degradation; Protein processing in endoplasmic reticulum [PATH:ko04141] Genetic Information Processing; Folding, Sorting and Degradation; Ubiquitin mediated proteolysis [PATH:ko04120] Genetic Information Processing; Folding, Sorting and Degradation; Ubiquitin system [BR:ko04121]	COG5113 Ubiquitin fusion degradation protein 2 O Posttranslational modification, protein turnover, chaperones ;	UFD2_SCHPO Ubiquitin conjugation factor E4 OS=Schizosaccharomyces pombe GN=ufd2 PE=2 SV=1	B0CVQ7_LACBS Predicted protein (Fragment) OS=Laccaria bicolor (strain S238N-H82) GN=LACBIDRAFT_245367 PE=4 SV=1	predicted protein [Laccaria bicolor S238N-H82]	IPR003613; U box domain IPR013078; Histidine phosphatase superfamily, clade-1 IPR013083; Zinc finger, RING/FYVE/PHD-type IPR019474; Ubiquitin conjugation factor E4, core	GO:0000151; ubiquitin ligase complex; Cellular Component GO:0004842; ubiquitin-protein ligase activity; Molecular Function GO:0006511; ubiquitin-dependent protein catabolic process; Biological Process GO:0016567; protein ubiquitination; Biological Process GO:0034450; ubiquitin-ubiquitin ligase activity; Molecular Function
G_lucidum_10007685	PF01428.10;	K07059 K07059 -- -- Unclassified; Poorly Characterized; General function prediction only	COG3582 Predicted nucleic acid binding protein containing the AN1-type Zn-finger R General function prediction only ;	ZFN2B_MOUSE AN1-type zinc finger protein 2B OS=Mus musculus GN=Zfand2b PE=1 SV=1	A8NR87_COPC7 Putative uncharacterized protein OS=Coprinopsis cinerea (strain Okayama-7 / 130 / FGSC 9003) GN=CC1G_07148 PE=4 SV=1	hypothetical protein CC1G_07148 [Coprinopsis cinerea okayama7#130]	IPR000058; Zinc finger, AN1-type	GO:0008270; zinc ion binding; Molecular Function
G_lucidum_10007686	NA	NA	NA	NA	A8NBK6_COPC7 Putative uncharacterized protein OS=Coprinopsis cinerea (strain Okayama-7 / 130 / FGSC 9003) GN=CC1G_02466 PE=4 SV=2	hypothetical protein CC1G_02466 [Coprinopsis cinerea okayama7#130]	NA	NA
G_lucidum_10000907	NA	NA	NA	NA	B0DMU9_LACBS Predicted protein OS=Laccaria bicolor (strain S238N-H82) GN=LACBIDRAFT_306411 PE=4 SV=1	predicted protein [Laccaria bicolor S238N-H82]	NA	NA
G_lucidum_10000908	NA	NA	NA	NA	NA	NA	NA	NA
G_lucidum_10000909	NA	NA	NA	NA	B8P5S1_POSPM Predicted protein OS=Postia placenta (strain ATCC 44394 / Madison 698-R) GN=POSPLDRAFT_90958 PE=4 SV=1	predicted protein [Postia placenta Mad-698-R]	NA	NA
G_lucidum_10000910	PF00665.20;	K07497 K07497 putative transposase -- Unclassified; Genetic Information Processing; Replication, recombination and repair proteins	COG2801 Transposase and inactivated derivatives L Replication, recombination and repair ;	RTF22_SCHPO Retrotransposable element Tf2 155 kDa protein type 2 OS=Schizosaccharomyces pombe GN=Tf2-7 PE=2 SV=1	B6Q6R4_PENMQ Retrovirus polyprotein, putative OS=Penicillium marneffei (strain ATCC 18224 / CBS 334.59 / QM 7333) GN=PMAA_034670 PE=4 SV=1	PREDICTED: retrotransposable element Tf2 155 kDa protein type 1-like [Xenopus (Silurana) tropicalis]	IPR001584; Integrase, catalytic core IPR012337; Ribonuclease H-like	GO:0003676; nucleic acid binding; Molecular Function GO:0003677; DNA binding; Molecular Function GO:0015074; DNA integration; Biological Process
G_lucidum_10000911	NA	NA	NA	NA	NA	NA	NA	NA
G_lucidum_10000912	NA	K12388 SORT1 sortilin -- Cellular Processes; Transport and Catabolism; Lysosome [PATH:ko04142] Organismal Systems; Nervous System; Neurotrophin signaling pathway [PATH:ko04722]	NA	YN94_YEAST Uncharacterized membrane glycoprotein YNR065C OS=Saccharomyces cerevisiae GN=YNR065C PE=1 SV=1	B0E2U2_LACBS Predicted protein OS=Laccaria bicolor (strain S238N-H82) GN=LACBIDRAFT_192355 PE=4 SV=1	predicted protein [Laccaria bicolor S238N-H82]	IPR006581; VPS10	GO:0016021; integral to membrane; Cellular Component
G_lucidum_10000913	NA	NA	NA	NA	B8PLS1_POSPM Predicted protein OS=Postia placenta (strain ATCC 44394 / Madison 698-R) GN=POSPLDRAFT_91970 PE=4 SV=1	predicted protein [Postia placenta Mad-698-R]	NA	NA
G_lucidum_10000914	NA	NA	NA	NA	B8PC53_POSPM Predicted protein OS=Postia placenta (strain ATCC 44394 / Madison 698-R) GN=POSPLDRAFT_93974 PE=4 SV=1	predicted protein [Postia placenta Mad-698-R]	NA	NA
G_lucidum_10000915	NA	NA	NA	NA	NA	NA	NA	NA
G_lucidum_10001313	PF07690.10;	K08231 SLC16A2 MFS transporter, MCP family, solute carrier family 16 (monocarboxylic acid transporters), member 2 -- Environmental Information Processing; Membrane Transport; Transporters [BR:ko02000]	NA	MCH5_YEAST Riboflavin transporter MCH5 OS=Saccharomyces cerevisiae GN=MCH5 PE=1 SV=1	D8PUB8_SCHCO Putative uncharacterized protein OS=Schizophyllum commune H4-8 GN=SCHCODRAFT_255825 PE=4 SV=1	hypothetical protein SCHCODRAFT_255825 [Schizophyllum commune H4-8]	IPR011701; Major facilitator superfamily MFS-1 IPR016196; Major facilitator superfamily, general substrate transporter IPR020846; Major facilitator superfamily	GO:0055085; transmembrane transport; Biological Process
G_lucidum_10001314	NA	NA	NA	NA	NA	NA	NA	NA
G_lucidum_10001315	PF01764.1;PF03060.9;	K09252 E3.1.1.73 feruloyl esterase 3.1.1.73 Unclassified; Metabolism; Others	COG2070 Dioxygenases related to 2-nitropropane dioxygenase R General function prediction only ;	LIP_RHIOR Lipase OS=Rhizopus oryzae PE=1 SV=1	A8QM10_TAICA Lipase OS=Taiwanofungus camphoratus PE=2 SV=1	lipase [Taiwanofungus camphoratus]	IPR001356; Homeobox IPR002921; Lipase, class 3 IPR004136; 2-nitropropane dioxygenase, NPD IPR009057; Homeodomain-like IPR012287; Homeodomain-related IPR013785; Aldolase-type TIM barrel	GO:0003677; DNA binding; Molecular Function GO:0003700; sequence-specific DNA binding transcription factor activity; Molecular Function GO:0003824; catalytic activity; Molecular Function GO:0004806; triglyceride lipase activity; Molecular Function GO:0005515; protein binding; Molecular Function GO:0006355; regulation of transcription, DNA-dependent; Biological Process GO:0006629; lipid metabolic …
G_lucidum_10001316	NA	NA	NA	NA	NA	NA	IPR012287; Homeodomain-related	GO:0003677; DNA binding; Molecular Function GO:0045449; regulation of transcription; Biological Process
G_lucidum_10001317	PF00324.15;	K03293 TC.AAT amino acid transporter, AAT family -- Unclassified; Cellular Processes and Signaling; Other ion-coupled transporters	NA	DIP5_YEAST Dicarboxylic amino acid permease OS=Saccharomyces cerevisiae GN=DIP5 PE=1 SV=1	B0CTL8_LACBS General APC amino acid permease OS=Laccaria bicolor (strain S238N-H82) GN=LACBIDRAFT_188015 PE=4 SV=1	general APC amino acid permease [Laccaria bicolor S238N-H82]	IPR002293; Amino acid/polyamine transporter I IPR004840; Amino acid permease, conserved site IPR004841; Amino acid permease domain	GO:0006810; transport; Biological Process GO:0006865; amino acid transport; Biological Process GO:0015171; amino acid transmembrane transporter activity; Molecular Function GO:0016020; membrane; Cellular Component GO:0016021; integral to membrane; Cellular Component GO:0055085; transmembrane transport; Biological Process
G_lucidum_10001318	NA	NA	NA	NA	NA	NA	NA	NA
G_lucidum_10001319	PF01764.1;	K09252 E3.1.1.73 feruloyl esterase 3.1.1.73 Unclassified; Metabolism; Others	NA	LIP_RHIOR Lipase OS=Rhizopus oryzae PE=1 SV=1	A8QM10_TAICA Lipase OS=Taiwanofungus camphoratus PE=2 SV=1	lipase [Taiwanofungus camphoratus]	IPR002921; Lipase, class 3	GO:0004806; triglyceride lipase activity; Molecular Function GO:0006629; lipid metabolic process; Biological Process
G_lucidum_10001320	PF06985.5;	NA	NA	HETE1_PODAN Vegetative incompatibility protein HET-E-1 OS=Podospora anserina GN=HET-E1 PE=4 SV=1	B8NBD8_ASPFN Putative uncharacterized protein OS=Aspergillus flavus (strain ATCC 200026 / FGSC A1120 / NRRL 3357 / JCM 12722 / SRRC 167) GN=AFLA_045130 PE=4 SV=1	conserved hypothetical protein [Aspergillus flavus NRRL3357]	IPR010730; Heterokaryon incompatibility	NA
G_lucidum_10001321	NA	NA	NA	NA	D8Q2L9_SCHCO Putative uncharacterized protein (Fragment) OS=Schizophyllum commune H4-8 GN=SCHCODRAFT_107534 PE=4 SV=1	hypothetical protein SCHCODRAFT_107534 [Schizophyllum commune H4-8]	NA	NA
G_lucidum_10001322	NA	NA	NA	NA	NA	NA	NA	NA
G_lucidum_10001323	NA	NA	NA	NA	D6RNE8_COPC7 Other/FunK1 protein kinase OS=Coprinopsis cinerea (strain Okayama-7 / 130 / FGSC 9003) GN=CC1G_15618 PE=4 SV=1	other/FunK1 protein kinase [Coprinopsis cinerea okayama7#130]	NA	NA
G_lucidum_10001324	NA	NA	NA	NA	D6RNE9_COPC7 Other/FunK1 protein kinase OS=Coprinopsis cinerea (strain Okayama-7 / 130 / FGSC 9003) GN=CC1G_15619 PE=4 SV=1	other/FunK1 protein kinase [Coprinopsis cinerea okayama7#130]	NA	NA
G_lucidum_10000395	NA	NA	NA	NA	NA	NA	NA	NA
G_lucidum_10008625	PF00098.17;	NA	NA	NA	B6QF01_PENMQ Reverse transcriptase, putative OS=Penicillium marneffei (strain ATCC 18224 / CBS 334.59 / QM 7333) GN=PMAA_090210 PE=4 SV=1	reverse transcriptase, putative [Penicillium marneffei ATCC 18224]	IPR001878; Zinc finger, CCHC-type IPR013084; Zinc finger, CCHC retroviral-type	GO:0003676; nucleic acid binding; Molecular Function GO:0008270; zinc ion binding; Molecular Function
G_lucidum_10008626	NA	NA	NA	NA	NA	NA	NA	NA
G_lucidum_10008627	NA	NA	NA	NA	NA	NA	NA	NA
G_lucidum_10008628	PF09445.4;	K01090 E3.1.3.16 protein phosphatase 3.1.3.16 Unclassified; Metabolism; Others	NA	TGS1_MOUSE Trimethylguanosine synthase OS=Mus musculus GN=Tgs1 PE=1 SV=2	A8N897_COPC7 Tgs1 protein OS=Coprinopsis cinerea (strain Okayama-7 / 130 / FGSC 9003) GN=CC1G_03944 PE=4 SV=1	Tgs1 protein [Coprinopsis cinerea okayama7#130]	IPR019012; RNA cap guanine-N2 methyltransferase	GO:0001510; RNA methylation; Biological Process GO:0008168; methyltransferase activity; Molecular Function GO:0009452; RNA capping; Biological Process
G_lucidum_10008629	PF00067.16;	K07415 CYP2E cytochrome P450, family 2, subfamily E 1.14.14.1 Metabolism; Lipid Metabolism; Arachidonic acid metabolism [PATH:ko00590] Metabolism; Lipid Metabolism; Linoleic acid metabolism [PATH:ko00591] Metabolism; Xenobiotics Biodegradation and Metabolism; Metabolism of xenobiotics by cytochrome P450 [PATH:ko00980] Metabolism; Xenobiotics Biodegradation and Metabolism; Drug metabolism - cytoch…	NA	ORDA_ASPFN O-methylsterigmatocystin oxidoreductase OS=Aspergillus flavus (strain ATCC 200026 / FGSC A1120 / NRRL 3357 / JCM 12722 / SRRC 167) GN=ordA PE=2 SV=1	B8MVW6_ASPFN Cytochrome P450 oxidoreductase OrdA-like, putative OS=Aspergillus flavus (strain ATCC 200026 / FGSC A1120 / NRRL 3357 / JCM 12722 / SRRC 167) GN=AFLA_073130 PE=3 SV=1	cytochrome P450 [Postia placenta]	IPR001128; Cytochrome P450 IPR002401; Cytochrome P450, E-class, group I	GO:0004497; monooxygenase activity; Molecular Function GO:0005506; iron ion binding; Molecular Function GO:0009055; electron carrier activity; Molecular Function GO:0020037; heme binding; Molecular Function GO:0055114; oxidation-reduction process; Biological Process
G_lucidum_10008630	PF00651.25;	NA	NA	NA	B8P6A9_POSPM Predicted protein OS=Postia placenta (strain ATCC 44394 / Madison 698-R) GN=POSPLDRAFT_97191 PE=4 SV=1	predicted protein [Postia placenta Mad-698-R]	IPR000210; BTB/POZ-like IPR011333; BTB/POZ fold IPR013069; BTB/POZ	GO:0005515; protein binding; Molecular Function
G_lucidum_10008631	PF01425.15;	K02433 gatA aspartyl-tRNA(Asn)/glutamyl-tRNA (Gln) amidotransferase subunit A 6.3.5.6 6.3.5.7 Genetic Information Processing; Translation; Aminoacyl-tRNA biosynthesis [PATH:ko00970]	COG0154 Asp-tRNAAsn/Glu-tRNAGln amidotransferase A subunit and related amidases J Translation, ribosomal structure and biogenesis ;	GATA_CLONN Glutamyl-tRNA(Gln) amidotransferase subunit A OS=Clostridium novyi (strain NT) GN=gatA PE=3 SV=1	B0CTH2_LACBS Predicted protein (Fragment) OS=Laccaria bicolor (strain S238N-H82) GN=LACBIDRAFT_143274 PE=4 SV=1	predicted protein [Laccaria bicolor S238N-H82]	IPR000120; Amidase IPR020556; Amidase, conserved site	GO:0016884; carbon-nitrogen ligase activity, with glutamine as amido-N-donor; Molecular Function
G_lucidum_10008632	PF00400.26;	K11684 BDF1 bromodomain-containing factor 1 -- Genetic Information Processing; Replication and Repair; Chromosome [BR:ko03036]	NA	PK1IP_DANRE p21-activated protein kinase-interacting protein 1-like OS=Danio rerio GN=pak1ip1 PE=2 SV=1	D8Q1W6_SCHCO Putative uncharacterized protein OS=Schizophyllum commune H4-8 GN=SCHCODRAFT_67600 PE=4 SV=1	hypothetical protein SCHCODRAFT_67600 [Schizophyllum commune H4-8]	IPR001680; WD40 repeat IPR011046; WD40 repeat-like-containing domain IPR015943; WD40/YVTN repeat-like-containing domain IPR017986; WD40-repeat-containing domain IPR019775; WD40 repeat, conserved site IPR019781; WD40 repeat, subgroup IPR019782; WD40 repeat 2	GO:0005515; protein binding; Molecular Function
G_lucidum_10008633	PF07713.7;PF01585.17;	K13123 GPATCH1 G patch domain-containing protein 1 -- Genetic Information Processing; Transcription; Spliceosome [BR:ko03041]	NA	GPTC1_BOVIN G patch domain-containing protein 1 OS=Bos taurus GN=GPATCH1 PE=2 SV=1	D8Q1W1_SCHCO Putative uncharacterized protein OS=Schizophyllum commune H4-8 GN=SCHCODRAFT_15518 PE=4 SV=1	hypothetical protein SCHCODRAFT_15518 [Schizophyllum commune H4-8]	IPR000467; D111/G-patch IPR011666; Domain of unknown function DUF1604	GO:0003676; nucleic acid binding; Molecular Function GO:0005622; intracellular; Cellular Component
G_lucidum_10008634	PF00324.15;	K03293 TC.AAT amino acid transporter, AAT family -- Unclassified; Cellular Processes and Signaling; Other ion-coupled transporters	NA	DIP5_YEAST Dicarboxylic amino acid permease OS=Saccharomyces cerevisiae GN=DIP5 PE=1 SV=1	Q8J266_HEBCY General amino acid permease 1 OS=Hebeloma cylindrosporum GN=GAP1 PE=2 SV=1	general amino acid permease 1 [Hebeloma cylindrosporum]	IPR002293; Amino acid/polyamine transporter I IPR004840; Amino acid permease, conserved site IPR004841; Amino acid permease domain	GO:0006810; transport; Biological Process GO:0006865; amino acid transport; Biological Process GO:0015171; amino acid transmembrane transporter activity; Molecular Function GO:0016020; membrane; Cellular Component GO:0016021; integral to membrane; Cellular Component GO:0055085; transmembrane transport; Biological Process
G_lucidum_10008635	PF00505.13;	K09274 K09274 HMG box factor, other -- Genetic Information Processing; Transcription; Transcription factors [BR:ko03000]	NA	ROX1_YEAST Repressor ROX1 OS=Saccharomyces cerevisiae GN=ROX1 PE=1 SV=1	C4QZE2_PICPG Heme-dependent repressor of hypoxic genes OS=Pichia pastoris (strain GS115) GN=PAS_chr2-1_0017 PE=4 SV=1	hypothetical protein HPODL_0274 [Pichia angusta DL-1]	IPR000910; High mobility group, HMG1/HMG2 IPR009071; High mobility group, superfamily	GO:0003677; DNA binding; Molecular Function GO:0005515; protein binding; Molecular Function GO:0005634; nucleus; Cellular Component
G_lucidum_10008636	PF00067.16;	K07422 CYP2U cytochrome P450, family 2, subfamily U -- Metabolism; Lipid Metabolism; Arachidonic acid metabolism [PATH:ko00590] Metabolism; Enzyme Families; Cytochrome P450 [BR:ko00199]	COG2124 Cytochrome P450 Q Secondary metabolites biosynthesis, transport and catabolism ;	ORDA_ASPFN O-methylsterigmatocystin oxidoreductase OS=Aspergillus flavus (strain ATCC 200026 / FGSC A1120 / NRRL 3357 / JCM 12722 / SRRC 167) GN=ordA PE=2 SV=1	Q2WCN3_9AGAR Putative CyP450 monooxygenase OS=Pleurotus sapidus GN=cyp450 PE=2 SV=1	putative CyP450 monooxygenase [Pleurotus sapidus]	IPR001128; Cytochrome P450 IPR002401; Cytochrome P450, E-class, group I	GO:0004497; monooxygenase activity; Molecular Function GO:0005506; iron ion binding; Molecular Function GO:0009055; electron carrier activity; Molecular Function GO:0020037; heme binding; Molecular Function GO:0055114; oxidation-reduction process; Biological Process
G_lucidum_10008637	NA	NA	NA	NA	NA	NA	NA	NA
G_lucidum_10008638	PF00780.16;PF00169.23;PF00621.14;PF00610.15;	K12331 ARHGEF11 Rho guanine nucleotide exchange factor 11 -- Organismal Systems; Circulatory System; Vascular smooth muscle contraction [PATH:ko04270]	COG5422 RhoGEF, Guanine nucleotide exchange factor for Rho/Rac/Cdc42-like GTPases T Signal transduction mechanisms ;	RGF1_SCHPO Rho1 guanine nucleotide exchange factor 1 OS=Schizosaccharomyces pombe GN=rgf1 PE=1 SV=1	B0CTN6_LACBS Predicted protein OS=Laccaria bicolor (strain S238N-H82) GN=LACBIDRAFT_291994 PE=4 SV=1	predicted protein [Laccaria bicolor S238N-H82]	IPR000219; Dbl homology (DH) domain IPR000591; DEP domain IPR001180; Citron-like IPR001331; Guanine-nucleotide dissociation stimulator, CDC24, conserved site IPR001849; Pleckstrin homology domain IPR011993; Pleckstrin homology-type	GO:0005083; small GTPase regulator activity; Molecular Function GO:0005085; guanyl-nucleotide exchange factor activity; Molecular Function GO:0005089; Rho guanyl-nucleotide exchange factor activity; Molecular Function GO:0005515; protein binding; Molecular Function GO:0005622; intracellular; Cellular Component GO:0023034; intracellular signaling pathway; Biological Process GO:0035023; regulation …
G_lucidum_10008639	PF08242.6;	K00599 E2.1.1.- -- -- Metabolism; Amino Acid Metabolism; Histidine metabolism [PATH:ko00340] Metabolism; Amino Acid Metabolism; Tyrosine metabolism [PATH:ko00350] Metabolism; Metabolism of Other Amino Acids; Selenoamino acid metabolism [PATH:ko00450] Metabolism; Xenobiotics Biodegradation and Metabolism; Naphthalene and anthracene degradation [PATH:ko00626]	NA	AB140_YEAST Uncharacterized methyltransferase ABP140 OS=Saccharomyces cerevisiae GN=ABP140 PE=1 SV=3	A8N8R7_COPC7 Actin filament binding protein OS=Coprinopsis cinerea (strain Okayama-7 / 130 / FGSC 9003) GN=CC1G_00792 PE=4 SV=1	actin filament binding protein [Coprinopsis cinerea okayama7#130]	IPR013217; Methyltransferase type 12 IPR017280; Methyltransferase, METTL2, predicted	GO:0008168; methyltransferase activity; Molecular Function
G_lucidum_10008640	PF01764.1;	K09252 E3.1.1.73 feruloyl esterase 3.1.1.73 Unclassified; Metabolism; Others	NA	LIP_THELA Lipase OS=Thermomyces lanuginosus GN=LIP PE=1 SV=1	A8QM10_TAICA Lipase OS=Taiwanofungus camphoratus PE=2 SV=1	lipase [Taiwanofungus camphoratus]	IPR002921; Lipase, class 3	GO:0004806; triglyceride lipase activity; Molecular Function GO:0006629; lipid metabolic process; Biological Process
G_lucidum_10008641	PF00150.12;	K01238 E3.2.1.- -- -- Unclassified; Metabolism; Others	COG2730 Endoglucanase G Carbohydrate transport and metabolism ;	EXGB_EMENI Glucan endo-1,6-beta-glucosidase B OS=Emericella nidulans GN=exgB PE=2 SV=1	B0CTA3_LACBS Glycoside hydrolase family 5 protein OS=Laccaria bicolor (strain S238N-H82) GN=LACBIDRAFT_305032 PE=4 SV=1	glycoside hydrolase family 5 protein [Laccaria bicolor S238N-H82]	IPR001547; Glycoside hydrolase, family 5 IPR013781; Glycoside hydrolase, subgroup, catalytic core IPR017853; Glycoside hydrolase, catalytic core	GO:0003824; catalytic activity; Molecular Function GO:0004553; hydrolase activity, hydrolyzing O-glycosyl compounds; Molecular Function GO:0005975; carbohydrate metabolic process; Biological Process GO:0043169; cation binding; Molecular Function
G_lucidum_10008642	NA	NA	NA	NA	B0E022_LACBS Predicted protein OS=Laccaria bicolor (strain S238N-H82) GN=LACBIDRAFT_315197 PE=4 SV=1	predicted protein [Laccaria bicolor S238N-H82]	NA	NA
G_lucidum_10008643	NA	NA	NA	NA	B8PB66_POSPM Predicted protein OS=Postia placenta (strain ATCC 44394 / Madison 698-R) GN=POSPLDRAFT_99125 PE=4 SV=1	predicted protein [Postia placenta Mad-698-R]	NA	NA
G_lucidum_10008644	NA	NA	NA	NA	NA	NA	NA	NA
G_lucidum_10008645	NA	K01852 E5.4.99.7, LSS, ERG7 lanosterol synthase 5.4.99.7 Metabolism; Lipid Metabolism; Steroid biosynthesis [PATH:ko00100]	COG1657 Squalene cyclase I Lipid transport and metabolism ;	ERG7_PNECA Lanosterol synthase OS=Pneumocystis carinii GN=ERG7 PE=2 SV=1	D7NJ68_GANLU Lanosterol synthase OS=Ganoderma lucidum GN=OSC PE=2 SV=1	lanosterol synthase [Ganoderma lucidum]	IPR008930; Terpenoid cylases/protein prenyltransferase alpha-alpha toroid	NA
G_lucidum_10008646	PF00432.15;	K01852 E5.4.99.7, LSS, ERG7 lanosterol synthase 5.4.99.7 Metabolism; Lipid Metabolism; Steroid biosynthesis [PATH:ko00100]	COG1657 Squalene cyclase I Lipid transport and metabolism ;	ERG7_PNECA Lanosterol synthase OS=Pneumocystis carinii GN=ERG7 PE=2 SV=1	D7NJ68_GANLU Lanosterol synthase OS=Ganoderma lucidum GN=OSC PE=2 SV=1	lanosterol synthase [Ganoderma lucidum]	IPR001330; Prenyltransferase/squalene oxidase IPR008930; Terpenoid cylases/protein prenyltransferase alpha-alpha toroid IPR018333; Squalene cyclase	GO:0003824; catalytic activity; Molecular Function GO:0016866; intramolecular transferase activity; Molecular Function
G_lucidum_10008647	PF00107.20;	K07119 K07119 -- -- Unclassified; Poorly Characterized; General function prediction only	COG2130 Putative NADP-dependent oxidoreductases R General function prediction only ;	YKM8_SCHPO Zinc-type alcohol dehydrogenase-like protein PB24D3.08c OS=Schizosaccharomyces pombe GN=SPAPB24D3.08c PE=2 SV=1	B0DP13_LACBS Predicted protein OS=Laccaria bicolor (strain S238N-H82) GN=LACBIDRAFT_185826 PE=4 SV=1	predicted protein [Laccaria bicolor S238N-H82]	IPR002085; Alcohol dehydrogenase superfamily, zinc-containing IPR011032; GroES-like IPR013149; Alcohol dehydrogenase, C-terminal IPR016040; NAD(P)-binding domain IPR020843; Polyketide synthase, enoylreductase	GO:0003824; catalytic activity; Molecular Function GO:0005488; binding; Molecular Function GO:0008152; metabolic process; Biological Process GO:0008270; zinc ion binding; Molecular Function GO:0016491; oxidoreductase activity; Molecular Function GO:0016747; transferase activity, transferring acyl groups other than amino-acyl groups; Molecular Function GO:0055114; oxidation-reduction process; Biol…
G_lucidum_10008648	PF12937.1;	NA	NA	NA	B8P005_POSPM Predicted protein OS=Postia placenta (strain ATCC 44394 / Madison 698-R) GN=POSPLDRAFT_93794 PE=4 SV=1	predicted protein [Postia placenta Mad-698-R]	NA	NA
G_lucidum_10008649	PF03061.16;	K07107 K07107 -- -- Unclassified; Poorly Characterized; General function prediction only	COG0824 Predicted thioesterase R General function prediction only ;	NA	D8Q1Z8_SCHCO Putative uncharacterized protein (Fragment) OS=Schizophyllum commune H4-8 GN=SCHCODRAFT_108425 PE=4 SV=1	hypothetical protein SCHCODRAFT_108425 [Schizophyllum commune H4-8]	IPR006683; Thioesterase superfamily	NA
G_lucidum_10008650	PF01302.19;	K10422 CLIP2, CYLN2 CAP-Gly domain-containing linker protein 2 -- Cellular Processes; Cell Motility; Cytoskeleton proteins [BR:ko04812]	NA	TBCB_BOVIN Tubulin-folding cofactor B OS=Bos taurus GN=TBCB PE=2 SV=1	A8N8L9_COPC7 Tubulin-folding cofactor B OS=Coprinopsis cinerea (strain Okayama-7 / 130 / FGSC 9003) GN=CC1G_09878 PE=4 SV=1	tubulin-folding cofactor B [Coprinopsis cinerea okayama7#130]	IPR000938; Cytoskeleton-associated protein, Gly-rich domain IPR023092; Cytoskeleton-associated protein, Gly-rich conserved site	NA
G_lucidum_10008651	PF02933.11;PF03982.7;PF02359.12;PF09336.4;PF00004.23;	K13525 VCP, CDC48 transitional endoplasmic reticulum ATPase -- Genetic Information Processing; Folding, Sorting and Degradation; Protein processing in endoplasmic reticulum [PATH:ko04141] Unclassified; Cellular Processes and Signaling; Other transporters	COG0464 ATPases of the AAA+ class O Posttranslational modification, protein turnover, chaperones ;	CDC48_SOYBN Cell division cycle protein 48 homolog OS=Glycine max GN=CDC48 PE=2 SV=1	D8Q215_SCHCO Putative uncharacterized protein OS=Schizophyllum commune H4-8 GN=SCHCODRAFT_85085 PE=3 SV=1	hypothetical protein SCHCODRAFT_85085 [Schizophyllum commune H4-8]	IPR003338; ATPase, AAA-type, VAT, N-terminal IPR003593; ATPase, AAA+ type, core IPR003959; ATPase, AAA-type, core IPR003960; ATPase, AAA-type, conserved site IPR004201; Cell division protein 48, CDC48, domain 2 IPR005938; ATPase, AAA-type, CDC48 IPR007130; Diacylglycerol acyltransferase IPR009010; Aspartate decarboxylase-like fold IPR015415; Vps4 oligomerisation, C-terminal	GO:0000166; nucleotide binding; Molecular Function GO:0005488; binding; Molecular Function GO:0005524; ATP binding; Molecular Function GO:0016747; transferase activity, transferring acyl groups other than amino-acyl groups; Molecular Function GO:0016787; hydrolase activity; Molecular Function GO:0017111; nucleoside-triphosphatase activity; Molecular Function
G_lucidum_10008652	PF12937.1;	NA	NA	NA	B8P005_POSPM Predicted protein OS=Postia placenta (strain ATCC 44394 / Madison 698-R) GN=POSPLDRAFT_93794 PE=4 SV=1	predicted protein [Postia placenta Mad-698-R]	NA	NA
G_lucidum_10008653	NA	NA	NA	NA	NA	NA	NA	NA
G_lucidum_10008654	PF00097.19;	NA	NA	NA	D8Q1U6_SCHCO Putative uncharacterized protein (Fragment) OS=Schizophyllum commune H4-8 GN=SCHCODRAFT_108367 PE=4 SV=1	hypothetical protein SCHCODRAFT_108367 [Schizophyllum commune H4-8]	IPR001841; Zinc finger, RING-type IPR013083; Zinc finger, RING/FYVE/PHD-type IPR017907; Zinc finger, RING-type, conserved site	GO:0005515; protein binding; Molecular Function GO:0008270; zinc ion binding; Molecular Function
G_lucidum_10008655	PF05871.6;	K12189 VPS25, EAP20 ESCRT-II complex subunit VPS25 -- Cellular Processes; Transport and Catabolism; Endocytosis [PATH:ko04144]	NA	VPS25_DANRE Vacuolar protein-sorting-associated protein 25 OS=Danio rerio GN=vps25 PE=2 SV=2	D8Q1R9_SCHCO Putative uncharacterized protein (Fragment) OS=Schizophyllum commune H4-8 GN=SCHCODRAFT_54547 PE=4 SV=1	hypothetical protein SCHCODRAFT_54547 [Schizophyllum commune H4-8]	IPR008570; ESCRT-II complex, vps25 subunit IPR014040; ESCRT-II complex, vps25 subunit, C-terminal winged helix IPR014041; ESCRT-II complex, vps25 subunit, N-terminal winged helix	NA
G_lucidum_10008656	NA	NA	NA	NA	NA	NA	NA	NA
G_lucidum_10008657	PF08766.5;	NA	NA	NA	D8Q1S2_SCHCO Putative uncharacterized protein OS=Schizophyllum commune H4-8 GN=SCHCODRAFT_234387 PE=4 SV=1	hypothetical protein SCHCODRAFT_234387 [Schizophyllum commune H4-8]	IPR014876; DEK, C-terminal	NA
G_lucidum_10008658	NA	NA	NA	NA	B0CTN4_LACBS Predicted protein (Fragment) OS=Laccaria bicolor (strain S238N-H82) GN=LACBIDRAFT_291993 PE=4 SV=1	predicted protein [Laccaria bicolor S238N-H82]	NA	NA
G_lucidum_10008659	PF00638.12;	NA	NA	NA	B0D338_LACBS Predicted protein OS=Laccaria bicolor (strain S238N-H82) GN=LACBIDRAFT_315759 PE=4 SV=1	predicted protein [Laccaria bicolor S238N-H82]	IPR000156; Ran binding protein 1 IPR011993; Pleckstrin homology-type	GO:0005515; protein binding; Molecular Function GO:0046907; intracellular transport; Biological Process
G_lucidum_10008660	PF00085.14;	K09584 PDIA6, TXNDC7 protein disulfide-isomerase A6 5.3.4.1 Genetic Information Processing; Folding, Sorting and Degradation; Chaperones and folding catalysts [BR:ko03110] Genetic Information Processing; Folding, Sorting and Degradation; Protein processing in endoplasmic reticulum [PATH:ko04141]	COG0526 Thiol-disulfide isomerase and thioredoxins OC Posttranslational modification, protein turnover, chaperones ; Energy production and conversion ;	YEU5_SCHPO Thioredoxin domain-containing protein C13F5.05, mitochondrial OS=Schizosaccharomyces pombe GN=SPAC13F5.05 PE=2 SV=2	B0CT48_LACBS Protein disulfide isomerase OS=Laccaria bicolor (strain S238N-H82) GN=LbPDI2 PE=4 SV=1	protein disulfide isomerase [Laccaria bicolor S238N-H82]	IPR005746; Thioredoxin IPR012335; Thioredoxin fold IPR012336; Thioredoxin-like fold IPR013766; Thioredoxin domain IPR017936; Thioredoxin-like	GO:0006662; glycerol ether metabolic process; Biological Process GO:0009055; electron carrier activity; Molecular Function GO:0015035; protein disulfide oxidoreductase activity; Molecular Function GO:0045454; cell redox homeostasis; Biological Process
G_lucidum_10008661	NA	NA	NA	NA	B8PK08_POSPM Predicted protein OS=Postia placenta (strain ATCC 44394 / Madison 698-R) GN=POSPLDRAFT_92177 PE=4 SV=1	predicted protein [Postia placenta Mad-698-R]	NA	NA
G_lucidum_10008662	PF02516.8;	K07151 STT3 dolichyl-diphosphooligosaccharide--protein glycosyltransferase 2.4.1.119 Metabolism; Glycan Biosynthesis and Metabolism; Glycosyltransferases [BR:ko01003] Metabolism; Glycan Biosynthesis and Metabolism; N-Glycan biosynthesis [PATH:ko00510] Genetic Information Processing; Folding, Sorting and Degradation; Protein processing in endoplasmic reticulum [PATH:ko04141]	COG1287 Uncharacterized membrane protein, required for N-linked glycosylation R General function prediction only ;	STT3_SCHPO Dolichyl-diphosphooligosaccharide--protein glycosyltransferase subunit stt3 OS=Schizosaccharomyces pombe GN=stt3 PE=2 SV=1	B0CT90_LACBS Oligosaccharyl transferase STT3 subunit OS=Laccaria bicolor (strain S238N-H82) GN=STT3 PE=4 SV=1	oligosaccharyl transferase STT3 subunit [Laccaria bicolor S238N-H82]	IPR003674; Oligosaccharyl transferase, STT3 subunit	GO:0004576; oligosaccharyl transferase activity; Molecular Function GO:0006486; protein glycosylation; Biological Process GO:0016020; membrane; Cellular Component
G_lucidum_10008663	PF00789.14;	K03671 trxA thioredoxin 1 -- Genetic Information Processing; Folding, Sorting and Degradation; Chaperones and folding catalysts [BR:ko03110]	NA	UBXN1_DANRE UBX domain-containing protein 1 OS=Danio rerio GN=ubxn1 PE=2 SV=1	E2LY43_CRIPE Putative uncharacterized protein OS=Moniliophthora perniciosa FA553 GN=MPER_12222 PE=4 SV=1	hypothetical protein MPER_12222 [Moniliophthora perniciosa FA553]	IPR001012; UBX IPR007087; Zinc finger, C2H2-type IPR009060; UBA-like IPR015940; Ubiquitin-associated/translation elongation factor EF1B, N-terminal, eukaryote	GO:0005515; protein binding; Molecular Function GO:0005622; intracellular; Cellular Component GO:0008270; zinc ion binding; Molecular Function
G_lucidum_10008664	NA	NA	NA	NA	B0CTQ3_LACBS Predicted protein OS=Laccaria bicolor (strain S238N-H82) GN=LACBIDRAFT_305221 PE=4 SV=1	predicted protein [Laccaria bicolor S238N-H82]	NA	NA
G_lucidum_10008665	NA	NA	NA	NA	B0DU85_LACBS Predicted protein OS=Laccaria bicolor (strain S238N-H82) GN=LACBIDRAFT_310382 PE=4 SV=1	predicted protein [Laccaria bicolor S238N-H82]	NA	NA
G_lucidum_10008666	NA	NA	NA	NA	NA	NA	NA	NA
G_lucidum_10008667	NA	NA	NA	NA	D8Q274_SCHCO Putative uncharacterized protein OS=Schizophyllum commune H4-8 GN=SCHCODRAFT_67662 PE=4 SV=1	hypothetical protein SCHCODRAFT_67662 [Schizophyllum commune H4-8]	NA	NA
G_lucidum_10008668	PF12937.1;	NA	NA	NA	B8P662_POSPM Predicted protein OS=Postia placenta (strain ATCC 44394 / Madison 698-R) GN=POSPLDRAFT_97135 PE=4 SV=1	predicted protein [Postia placenta Mad-698-R]	NA	NA
G_lucidum_10008669	PF12937.1;	NA	NA	NA	B8P662_POSPM Predicted protein OS=Postia placenta (strain ATCC 44394 / Madison 698-R) GN=POSPLDRAFT_97135 PE=4 SV=1	predicted protein [Postia placenta Mad-698-R]	NA	NA
G_lucidum_10008670	PF00097.19;	K12008 TRIM26 tripartite motif-containing protein 26 -- Genetic Information Processing; Folding, Sorting and Degradation; Ubiquitin system [BR:ko04121]	NA	PSH1_YEAST RING finger protein PSH1 OS=Saccharomyces cerevisiae GN=PSH1 PE=1 SV=1	A8N8R0_COPC7 Putative uncharacterized protein OS=Coprinopsis cinerea (strain Okayama-7 / 130 / FGSC 9003) GN=CC1G_00785 PE=4 SV=1	hypothetical protein CC1G_00785 [Coprinopsis cinerea okayama7#130]	IPR001841; Zinc finger, RING-type IPR013083; Zinc finger, RING/FYVE/PHD-type IPR018957; Zinc finger, C3HC4 RING-type	GO:0005515; protein binding; Molecular Function GO:0008270; zinc ion binding; Molecular Function
G_lucidum_10008671	NA	NA	NA	NA	NA	NA	NA	NA
G_lucidum_10008672	PF00150.12;	K01238 E3.2.1.- -- -- Unclassified; Metabolism; Others	COG2730 Endoglucanase G Carbohydrate transport and metabolism ;	EXGB_ASPTN Probable glucan endo-1,6-beta-glucosidase B OS=Aspergillus terreus (strain NIH 2624 / FGSC A1156) GN=exgB PE=3 SV=1	B0CTA3_LACBS Glycoside hydrolase family 5 protein OS=Laccaria bicolor (strain S238N-H82) GN=LACBIDRAFT_305032 PE=4 SV=1	glycoside hydrolase family 5 protein [Laccaria bicolor S238N-H82]	IPR001547; Glycoside hydrolase, family 5 IPR013781; Glycoside hydrolase, subgroup, catalytic core IPR017853; Glycoside hydrolase, catalytic core	GO:0003824; catalytic activity; Molecular Function GO:0004553; hydrolase activity, hydrolyzing O-glycosyl compounds; Molecular Function GO:0005975; carbohydrate metabolic process; Biological Process GO:0043169; cation binding; Molecular Function
G_lucidum_10008673	PF01764.1;	K01046 E3.1.1.3 triacylglycerol lipase 3.1.1.3 Metabolism; Lipid Metabolism; Glycerolipid metabolism [PATH:ko00561]	NA	LIP_RHIMI Lipase OS=Rhizomucor miehei PE=1 SV=2	A8QM10_TAICA Lipase OS=Taiwanofungus camphoratus PE=2 SV=1	lipase [Taiwanofungus camphoratus]	IPR002921; Lipase, class 3	GO:0004806; triglyceride lipase activity; Molecular Function GO:0006629; lipid metabolic process; Biological Process
G_lucidum_10008674	PF00083.18;	K08070 E1.3.1.74 2-alkenal reductase 1.3.1.74 Unclassified; Metabolism; Others	COG0477 Permeases of the major facilitator superfamily GEPR Carbohydrate transport and metabolism ; Amino acid transport and metabolism ; Inorganic ion transport and metabolism ; General function prediction only ;	PLT1_ARATH Putative polyol transporter 1 OS=Arabidopsis thaliana GN=PLT1 PE=2 SV=1	Q6CAT5_YARLI YALI0D00132p OS=Yarrowia lipolytica GN=YALI0D00132g PE=3 SV=1	YALI0D00132p [Yarrowia lipolytica]	IPR003663; Sugar/inositol transporter IPR005828; General substrate transporter IPR016196; Major facilitator superfamily, general substrate transporter IPR020846; Major facilitator superfamily	GO:0005215; transporter activity; Molecular Function GO:0006810; transport; Biological Process GO:0016020; membrane; Cellular Component GO:0016021; integral to membrane; Cellular Component GO:0022891; substrate-specific transmembrane transporter activity; Molecular Function GO:0055085; transmembrane transport; Biological Process
G_lucidum_10008675	PF10355.3;PF10348.3;	NA	NA	YTP1_YEAST Protein YTP1 OS=Saccharomyces cerevisiae GN=YTP1 PE=1 SV=1	D8Q1Z2_SCHCO Putative uncharacterized protein OS=Schizophyllum commune H4-8 GN=SCHCODRAFT_76267 PE=4 SV=1	hypothetical protein SCHCODRAFT_76267 [Schizophyllum commune H4-8]	IPR018825; Domain of unknown function DUF2427 IPR018827; Uncharacterised protein family YCR061W, C-terminal	NA
G_lucidum_10008676	NA	NA	NA	NA	NA	NA	NA	NA
G_lucidum_10008677	NA	NA	NA	NA	B8PDV2_POSPM Predicted protein OS=Postia placenta (strain ATCC 44394 / Madison 698-R) GN=POSPLDRAFT_105148 PE=4 SV=1	predicted protein [Postia placenta Mad-698-R]	IPR007087; Zinc finger, C2H2-type IPR013087; Zinc finger, C2H2-type/integrase, DNA-binding	GO:0003676; nucleic acid binding; Molecular Function GO:0005622; intracellular; Cellular Component GO:0008270; zinc ion binding; Molecular Function
G_lucidum_10008678	NA	NA	NA	NA	D8Q3E3_SCHCO Putative uncharacterized protein OS=Schizophyllum commune H4-8 GN=SCHCODRAFT_53625 PE=4 SV=1	hypothetical protein SCHCODRAFT_53625 [Schizophyllum commune H4-8]	NA	NA
G_lucidum_10008679	NA	NA	NA	NA	B8PH67_POSPM Predicted protein OS=Postia placenta (strain ATCC 44394 / Madison 698-R) GN=POSPLDRAFT_97341 PE=4 SV=1	predicted protein [Postia placenta Mad-698-R]	NA	NA
G_lucidum_10008680	PF08615.5;	K02542 MCM6 minichromosome maintenance protein 6 -- Genetic Information Processing; Replication and Repair; DNA replication [PATH:ko03030] Genetic Information Processing; Replication and Repair; DNA replication proteins [BR:ko03032] Cellular Processes; Cell Growth and Death; Cell cycle [PATH:ko04110] Cellular Processes; Cell Growth and Death; Cell cycle - yeast [PATH:ko04111] Cellular Processes; …	NA	NA	D8Q2F8_SCHCO Putative uncharacterized protein (Fragment) OS=Schizophyllum commune H4-8 GN=SCHCODRAFT_108584 PE=4 SV=1	hypothetical protein SCHCODRAFT_108584 [Schizophyllum commune H4-8]	IPR013924; Ribonuclease H2, subunit C	NA
G_lucidum_10008681	NA	NA	NA	NA	D8PQ12_SCHCO Putative uncharacterized protein OS=Schizophyllum commune H4-8 GN=SCHCODRAFT_83799 PE=4 SV=1	hypothetical protein MELLADRAFT_72374 [Melampsora larici-populina 98AG31]	NA	NA
G_lucidum_10008682	NA	NA	NA	NA	B8PL37_POSPM Predicted protein OS=Postia placenta (strain ATCC 44394 / Madison 698-R) GN=POSPLDRAFT_96138 PE=4 SV=1	predicted protein [Postia placenta Mad-698-R]	NA	NA
G_lucidum_10008683	NA	NA	NA	NA	B8PKM8_POSPM Predicted protein OS=Postia placenta (strain ATCC 44394 / Madison 698-R) GN=POSPLDRAFT_104361 PE=4 SV=1	predicted protein [Postia placenta Mad-698-R]	NA	NA
G_lucidum_10008684	PF03060.9;	K00540 E1.-.-.- -- -- Unclassified; Metabolism; Others	COG2070 Dioxygenases related to 2-nitropropane dioxygenase R General function prediction only ;	Y1533_MYCTU Putative monooxygenase Rv1533 OS=Mycobacterium tuberculosis GN=Rv1533 PE=3 SV=1	A8N8R3_COPC7 2-nitropropane dioxygenase OS=Coprinopsis cinerea (strain Okayama-7 / 130 / FGSC 9003) GN=CC1G_00788 PE=4 SV=1	2-nitropropane dioxygenase [Coprinopsis cinerea okayama7#130]	IPR004136; 2-nitropropane dioxygenase, NPD IPR013785; Aldolase-type TIM barrel	GO:0003824; catalytic activity; Molecular Function GO:0008152; metabolic process; Biological Process GO:0018580; nitronate monooxygenase activity; Molecular Function GO:0055114; oxidation-reduction process; Biological Process
G_lucidum_10008685	NA	NA	NA	NA	D8Q1R4_SCHCO Putative uncharacterized protein OS=Schizophyllum commune H4-8 GN=SCHCODRAFT_67570 PE=4 SV=1	hypothetical protein SCHCODRAFT_67570 [Schizophyllum commune H4-8]	NA	NA
G_lucidum_10008686	NA	NA	NA	NA	B8P0Q2_POSPM Predicted protein OS=Postia placenta (strain ATCC 44394 / Madison 698-R) GN=POSPLDRAFT_96483 PE=4 SV=1	predicted protein [Postia placenta Mad-698-R]	NA	NA
G_lucidum_10008687	PF04156.8;PF10495.3;	NA	NA	NA	B0CTQ9_LACBS Putative uncharacterized protein OS=Laccaria bicolor (strain S238N-H82) GN=LACBIDRAFT_305228 PE=4 SV=1	hypothetical protein LACBIDRAFT_305228 [Laccaria bicolor S238N-H82]	IPR009053; Prefoldin IPR019528; Pericentrin/AKAP-450 centrosomal targeting domain	NA
G_lucidum_10008688	PF01066.15;	K08744 CRLS cardiolipin synthase 2.7.8.- Metabolism; Lipid Metabolism; Glycerophospholipid metabolism [PATH:ko00564]	COG0558 Phosphatidylglycerophosphate synthase I Lipid transport and metabolism ;	CRD1_YEAST Cardiolipin synthase OS=Saccharomyces cerevisiae GN=CRD1 PE=1 SV=1	D6RNP4_COPC7 Phosphatidyl synthase OS=Coprinopsis cinerea (strain Okayama-7 / 130 / FGSC 9003) GN=CC1G_14816 PE=3 SV=1	phosphatidyl synthase [Coprinopsis cinerea okayama7#130]	IPR000462; CDP-alcohol phosphatidyltransferase IPR004570; CDP-diacylglycerol--glycerol-3-phosphate 3-phosphatidyltransferase	GO:0008444; CDP-diacylglycerol-glycerol-3-phosphate 3-phosphatidyltransferase activity; Molecular Function GO:0008654; phospholipid biosynthetic process; Biological Process GO:0016020; membrane; Cellular Component GO:0016021; integral to membrane; Cellular Component GO:0016780; phosphotransferase activity, for other substituted phosphate groups; Molecular Function
G_lucidum_10008689	NA	NA	NA	NA	NA	NA	NA	NA
G_lucidum_10008690	NA	NA	NA	NA	B0D988_LACBS Predicted protein OS=Laccaria bicolor (strain S238N-H82) GN=LACBIDRAFT_326619 PE=4 SV=1	predicted protein [Laccaria bicolor S238N-H82]	IPR012337; Ribonuclease H-like	GO:0003676; nucleic acid binding; Molecular Function
G_lucidum_10008691	PF00651.25;	NA	NA	NA	B8P6E8_POSPM Predicted protein OS=Postia placenta (strain ATCC 44394 / Madison 698-R) GN=POSPLDRAFT_94637 PE=4 SV=1	predicted protein [Postia placenta Mad-698-R]	IPR000210; BTB/POZ-like IPR011333; BTB/POZ fold IPR013069; BTB/POZ	GO:0005515; protein binding; Molecular Function
G_lucidum_10008692	PF02204.12;PF02845.10;	NA	NA	VPS91_SCHPO Vacuolar protein sorting-associated protein 9a OS=Schizosaccharomyces pombe GN=vps901 PE=2 SV=1	B0CTR9_LACBS Predicted protein OS=Laccaria bicolor (strain S238N-H82) GN=LACBIDRAFT_305240 PE=4 SV=1	predicted protein [Laccaria bicolor S238N-H82]	IPR003123; Vacuolar sorting protein 9 IPR003892; Ubiquitin system component Cue IPR009060; UBA-like IPR013995; Vacuolar sorting protein 9, subgroup	GO:0005515; protein binding; Molecular Function
G_lucidum_10008693	PF00651.25;	NA	NA	NA	B8P0R1_POSPM Predicted protein OS=Postia placenta (strain ATCC 44394 / Madison 698-R) GN=POSPLDRAFT_96498 PE=4 SV=1	predicted protein [Postia placenta Mad-698-R]	IPR000210; BTB/POZ-like IPR013069; BTB/POZ	GO:0005515; protein binding; Molecular Function
G_lucidum_10008694	PF00651.25;	NA	NA	NA	B8P0R1_POSPM Predicted protein OS=Postia placenta (strain ATCC 44394 / Madison 698-R) GN=POSPLDRAFT_96498 PE=4 SV=1	predicted protein [Postia placenta Mad-698-R]	IPR000210; BTB/POZ-like IPR013069; BTB/POZ	GO:0005515; protein binding; Molecular Function
G_lucidum_10008695	NA	NA	NA	NA	NA	NA	NA	NA
G_lucidum_10008696	PF08550.4;	NA	NA	YIDF_SCHPO Uncharacterized protein C227.15 OS=Schizosaccharomyces pombe GN=SPAC227.15 PE=2 SV=1	B8P0P9_POSPM Predicted protein OS=Postia placenta (strain ATCC 44394 / Madison 698-R) GN=POSPLDRAFT_96477 PE=4 SV=1	predicted protein [Postia placenta Mad-698-R]	IPR013860; Protein of unknown function DUF1752, fungi	NA
G_lucidum_10008697	PF00651.25;	NA	NA	NA	B8P6A9_POSPM Predicted protein OS=Postia placenta (strain ATCC 44394 / Madison 698-R) GN=POSPLDRAFT_97191 PE=4 SV=1	predicted protein [Postia placenta Mad-698-R]	IPR000210; BTB/POZ-like IPR011333; BTB/POZ fold IPR013069; BTB/POZ	GO:0005515; protein binding; Molecular Function
G_lucidum_10008698	PF00651.25;	NA	NA	NA	B8P0R1_POSPM Predicted protein OS=Postia placenta (strain ATCC 44394 / Madison 698-R) GN=POSPLDRAFT_96498 PE=4 SV=1	predicted protein [Postia placenta Mad-698-R]	IPR000210; BTB/POZ-like IPR011333; BTB/POZ fold IPR013069; BTB/POZ	GO:0005515; protein binding; Molecular Function
G_lucidum_10008699	PF00651.25;	NA	NA	NA	B8P0R1_POSPM Predicted protein OS=Postia placenta (strain ATCC 44394 / Madison 698-R) GN=POSPLDRAFT_96498 PE=4 SV=1	predicted protein [Postia placenta Mad-698-R]	IPR000210; BTB/POZ-like IPR011333; BTB/POZ fold IPR013069; BTB/POZ	GO:0005515; protein binding; Molecular Function
G_lucidum_10008700	PF00651.25;	NA	NA	NA	B8P0R1_POSPM Predicted protein OS=Postia placenta (strain ATCC 44394 / Madison 698-R) GN=POSPLDRAFT_96498 PE=4 SV=1	predicted protein [Postia placenta Mad-698-R]	IPR000210; BTB/POZ-like IPR011333; BTB/POZ fold IPR013069; BTB/POZ	GO:0005515; protein binding; Molecular Function
G_lucidum_10008701	PF01154.11;PF08540.4;	K01641 E2.3.3.10, pksG hydroxymethylglutaryl-CoA synthase 2.3.3.10 Metabolism; Carbohydrate Metabolism; Butanoate metabolism [PATH:ko00650] Metabolism; Lipid Metabolism; Synthesis and degradation of ketone bodies [PATH:ko00072] Metabolism; Amino Acid Metabolism; Valine, leucine and isoleucine degradation [PATH:ko00280] Metabolism; Metabolism of Terpenoids and Polyketides; Terpenoid backbone biosy…	COG3425 3-hydroxy-3-methylglutaryl CoA synthase I Lipid transport and metabolism ;	HMCSA_DICDI Hydroxymethylglutaryl-CoA synthase A OS=Dictyostelium discoideum GN=hgsA PE=1 SV=2	B0CTR5_LACBS Predicted protein OS=Laccaria bicolor (strain S238N-H82) GN=LACBIDRAFT_182480 PE=4 SV=1	predicted protein [Laccaria bicolor S238N-H82]	IPR010122; Hydroxymethylglutaryl-CoA synthase, eukaryotic IPR013528; Hydroxymethylglutaryl-coenzyme A synthase, N-terminal IPR013746; Hydroxymethylglutaryl-coenzyme A synthase C-terminal IPR016038; Thiolase-like, subgroup IPR016039; Thiolase-like	GO:0003824; catalytic activity; Molecular Function GO:0004421; hydroxymethylglutaryl-CoA synthase activity; Molecular Function GO:0008152; metabolic process; Biological Process GO:0008299; isoprenoid biosynthetic process; Biological Process
G_lucidum_10008702	NA	NA	NA	NA	B8P0R1_POSPM Predicted protein OS=Postia placenta (strain ATCC 44394 / Madison 698-R) GN=POSPLDRAFT_96498 PE=4 SV=1	predicted protein [Postia placenta Mad-698-R]	NA	NA
G_lucidum_10008703	PF01256.11;	NA	COG0063 Predicted sugar kinase G Carbohydrate transport and metabolism ;	CARKD_HUMAN Carbohydrate kinase domain-containing protein OS=Homo sapiens GN=CARKD PE=1 SV=1	B8P0R3_POSPM Predicted protein OS=Postia placenta (strain ATCC 44394 / Madison 698-R) GN=POSPLDRAFT_96500 PE=4 SV=1	predicted protein [Postia placenta Mad-698-R]	IPR000631; Uncharacterised protein family, carbohydrate kinase-related	NA
G_lucidum_10008704	NA	NA	NA	NA	NA	NA	NA	NA
G_lucidum_10008705	NA	NA	NA	SFC4_SCHPO Transcription factor tau subunit sfc4 OS=Schizosaccharomyces pombe GN=sfc4 PE=1 SV=1	B0DP27_LACBS Predicted protein OS=Laccaria bicolor (strain S238N-H82) GN=LACBIDRAFT_306967 PE=4 SV=1	predicted protein [Laccaria bicolor S238N-H82]	IPR011990; Tetratricopeptide-like helical IPR013026; Tetratricopeptide repeat-containing IPR019734; Tetratricopeptide repeat	GO:0005488; binding; Molecular Function GO:0005515; protein binding; Molecular Function
G_lucidum_10008706	PF08271.6;PF00382.13;	K03124 TFIIB transcription initiation factor TFIIB -- Genetic Information Processing; Transcription; Basal transcription factors [PATH:ko03022]	COG1405 Transcription initiation factor TFIIIB, Brf1 subunit/Transcription initiation factor TFIIB K Transcription ;	TF2B_SCHPO Transcription initiation factor IIB OS=Schizosaccharomyces pombe GN=sua7 PE=2 SV=1	B0CXM4_LACBS Predicted protein OS=Laccaria bicolor (strain S238N-H82) GN=LACBIDRAFT_188636 PE=4 SV=1	predicted protein [Laccaria bicolor S238N-H82]	IPR000812; Transcription factor TFIIB-related IPR011028; Cyclin-like IPR013137; Zinc finger, TFIIB-type IPR013150; Transcription factor TFIIB, cyclin-related IPR013763; Cyclin-related	GO:0003743; translation initiation factor activity; Molecular Function GO:0006352; transcription initiation; Biological Process GO:0006355; regulation of transcription, DNA-dependent; Biological Process GO:0006413; translational initiation; Biological Process GO:0008270; zinc ion binding; Molecular Function GO:0030528; transcription regulator activity; Molecular Function GO:0045449; regulation of…
G_lucidum_10008707	NA	NA	NA	NA	NA	NA	NA	NA
G_lucidum_10008708	NA	NA	NA	NA	NA	NA	NA	NA
G_lucidum_10008709	NA	NA	NA	NA	A0E1Q1_PARTE Chromosome undetermined scaffold_73, whole genome shotgun sequence OS=Paramecium tetraurelia GN=GSPATT00022389001 PE=4 SV=1	hypothetical protein [Paramecium tetraurelia strain d4-2]	NA	NA
G_lucidum_10008710	PF03936.10;	K12250 E4.2.3.7 pentalenene synthase 4.2.3.7 Metabolism; Metabolism of Terpenoids and Polyketides; Sesquiterpenoid biosynthesis [PATH:ko00909]	NA	PTLS_STRS3 Pentalenene synthase OS=Streptomyces sp. (strain UC5319) PE=1 SV=4	D8QHD1_SCHCO Putative uncharacterized protein OS=Schizophyllum commune H4-8 GN=SCHCODRAFT_17515 PE=4 SV=1	hypothetical protein SCHCODRAFT_17515 [Schizophyllum commune H4-8]	IPR005630; Terpene synthase, metal-binding domain IPR008949; Terpenoid synthase	GO:0000287; magnesium ion binding; Molecular Function GO:0016829; lyase activity; Molecular Function
G_lucidum_10008711	NA	NA	NA	NA	NA	NA	NA	NA
G_lucidum_10008712	PF01794.13;PF08030.6;PF08022.6;	K00521 E1.16.1.7 ferric-chelate reductase 1.16.1.7 Unclassified; Metabolism; Others	NA	FRE7_YEAST Ferric/cupric reductase transmembrane component 7 OS=Saccharomyces cerevisiae GN=FRE7 PE=1 SV=2	D8Q5S3_SCHCO Putative uncharacterized protein OS=Schizophyllum commune H4-8 GN=SCHCODRAFT_235086 PE=4 SV=1	hypothetical protein SCHCODRAFT_235086 [Schizophyllum commune H4-8]	IPR013112; FAD-binding 8 IPR013121; Ferric reductase, NAD binding IPR013130; Flavoprotein transmembrane component IPR017927; Ferredoxin reductase-type FAD-binding domain	GO:0005506; iron ion binding; Molecular Function GO:0009055; electron carrier activity; Molecular Function GO:0016021; integral to membrane; Cellular Component GO:0016491; oxidoreductase activity; Molecular Function GO:0050660; FAD or FADH2 binding; Molecular Function GO:0055114; oxidation-reduction process; Biological Process
G_lucidum_10008713	PF08740.5;PF00004.23;	K08900 BCS1 mitochondrial chaperone BCS1 -- Unclassified; Genetic Information Processing; Others	COG0465 ATP-dependent Zn proteases O Posttranslational modification, protein turnover, chaperones ;	BCS1B_DICDI Probable mitochondrial chaperone BCS1-B OS=Dictyostelium discoideum GN=bcsl1b PE=3 SV=1	A8N8W7_COPC7 Mitochondrial chaperone bcs1 OS=Coprinopsis cinerea (strain Okayama-7 / 130 / FGSC 9003) GN=CC1G_00842 PE=3 SV=2	mitochondrial chaperone bcs1 [Coprinopsis cinerea okayama7#130]	IPR003593; ATPase, AAA+ type, core IPR003959; ATPase, AAA-type, core IPR014851; BCS1, N-terminal	GO:0000166; nucleotide binding; Molecular Function GO:0005524; ATP binding; Molecular Function GO:0017111; nucleoside-triphosphatase activity; Molecular Function
G_lucidum_10008714	PF08740.5;PF00004.23;	K08900 BCS1 mitochondrial chaperone BCS1 -- Unclassified; Genetic Information Processing; Others	COG0465 ATP-dependent Zn proteases O Posttranslational modification, protein turnover, chaperones ;	BCS1B_DICDI Probable mitochondrial chaperone BCS1-B OS=Dictyostelium discoideum GN=bcsl1b PE=3 SV=1	A8N8W7_COPC7 Mitochondrial chaperone bcs1 OS=Coprinopsis cinerea (strain Okayama-7 / 130 / FGSC 9003) GN=CC1G_00842 PE=3 SV=2	mitochondrial chaperone bcs1 [Coprinopsis cinerea okayama7#130]	IPR003593; ATPase, AAA+ type, core IPR003959; ATPase, AAA-type, core IPR003960; ATPase, AAA-type, conserved site IPR014851; BCS1, N-terminal	GO:0000166; nucleotide binding; Molecular Function GO:0005524; ATP binding; Molecular Function GO:0017111; nucleoside-triphosphatase activity; Molecular Function
G_lucidum_10008715	NA	NA	NA	NA	A8N8V0_COPC7 Putative uncharacterized protein OS=Coprinopsis cinerea (strain Okayama-7 / 130 / FGSC 9003) GN=CC1G_00825 PE=4 SV=1	hypothetical protein CC1G_00825 [Coprinopsis cinerea okayama7#130]	NA	NA
G_lucidum_10008716	PF07690.10;	K13336 PEX3 peroxin-3 -- Cellular Processes; Transport and Catabolism; Peroxisome [PATH:ko04146]	NA	YHDC_SCHPO Uncharacterized transporter C1683.12 OS=Schizosaccharomyces pombe GN=SPBC1683.12 PE=2 SV=1	D8Q1P3_SCHCO Putative uncharacterized protein (Fragment) OS=Schizophyllum commune H4-8 GN=SCHCODRAFT_108320 PE=4 SV=1	hypothetical protein SCHCODRAFT_108320 [Schizophyllum commune H4-8]	IPR011701; Major facilitator superfamily MFS-1 IPR016196; Major facilitator superfamily, general substrate transporter IPR020846; Major facilitator superfamily	GO:0055085; transmembrane transport; Biological Process
G_lucidum_10008717	PF01569.15;	K07252 E3.6.1.43 dolichyldiphosphatase 3.6.1.43 Metabolism; Glycan Biosynthesis and Metabolism; N-Glycan biosynthesis [PATH:ko00510]	COG0671 Membrane-associated phospholipid phosphatase I Lipid transport and metabolism ;	DOPP_NEUCR Putative dolichyldiphosphatase OS=Neurospora crassa GN=17E5.220 PE=3 SV=1	B8PM79_POSPM Predicted protein OS=Postia placenta (strain ATCC 44394 / Madison 698-R) GN=POSPLDRAFT_89025 PE=4 SV=1	predicted protein [Postia placenta Mad-698-R]	IPR000326; Phosphatidic acid phosphatase type 2/haloperoxidase IPR016118; Phosphatidic acid phosphatase/chloroperoxidase, N-terminal	GO:0003824; catalytic activity; Molecular Function GO:0016020; membrane; Cellular Component
G_lucidum_10008718	PF02569.1;	K01918 panC pantoate--beta-alanine ligase 6.3.2.1 Metabolism; Metabolism of Other Amino Acids; beta-Alanine metabolism [PATH:ko00410] Metabolism; Metabolism of Cofactors and Vitamins; Pantothenate and CoA biosynthesis [PATH:ko00770]	COG0414 Panthothenate synthetase H Coenzyme transport and metabolism ;	PANC_YEAST Pantoate--beta-alanine ligase OS=Saccharomyces cerevisiae GN=PAN6 PE=1 SV=2	A8N8U6_COPC7 Pantothenate synthetase OS=Coprinopsis cinerea (strain Okayama-7 / 130 / FGSC 9003) GN=CC1G_00821 PE=3 SV=2	pantothenate synthetase [Coprinopsis cinerea okayama7#130]	IPR003721; Pantoate-beta-alanine ligase IPR014729; Rossmann-like alpha/beta/alpha sandwich fold	GO:0004592; pantoate-beta-alanine ligase activity; Molecular Function GO:0015940; pantothenate biosynthetic process; Biological Process
G_lucidum_10008719	NA	NA	NA	NA	B0CYZ4_LACBS Predicted protein OS=Laccaria bicolor (strain S238N-H82) GN=LACBIDRAFT_312056 PE=4 SV=1	predicted protein [Laccaria bicolor S238N-H82]	NA	NA
G_lucidum_10008720	NA	NA	NA	NA	B8PHG1_POSPM Predicted protein OS=Postia placenta (strain ATCC 44394 / Madison 698-R) GN=POSPLDRAFT_105586 PE=4 SV=1	predicted protein [Postia placenta Mad-698-R]	NA	NA
G_lucidum_10008721	PF00145.11;PF00176.17;	K08282 E2.7.11.1 non-specific serine/threonine protein kinase 2.7.11.1 Unclassified; Cellular Processes and Signaling; Signal transduction mechanisms	COG0553 Superfamily II DNA/RNA helicases, SNF2 family KL Transcription ; Replication, recombination and repair ;	RAD5_YARLI DNA repair protein RAD5 OS=Yarrowia lipolytica GN=RAD5 PE=3 SV=1	B8P7F7_POSPM Predicted protein OS=Postia placenta (strain ATCC 44394 / Madison 698-R) GN=POSPLDRAFT_100986 PE=4 SV=1	predicted protein [Postia placenta Mad-698-R]	IPR000330; SNF2-related IPR001525; C-5 cytosine methyltransferase IPR001650; Helicase, C-terminal IPR014001; DEAD-like helicase, N-terminal	GO:0003676; nucleic acid binding; Molecular Function GO:0003677; DNA binding; Molecular Function GO:0004386; helicase activity; Molecular Function GO:0005524; ATP binding; Molecular Function GO:0006306; DNA methylation; Biological Process
G_lucidum_10008722	NA	NA	NA	NA	D8QIN4_SCHCO Putative uncharacterized protein OS=Schizophyllum commune H4-8 GN=SCHCODRAFT_61553 PE=4 SV=1	hypothetical protein SCHCODRAFT_61553 [Schizophyllum commune H4-8]	NA	NA
G_lucidum_10008723	PF00067.16;	K00517 E1.14.-.- -- -- Metabolism; Metabolism of Terpenoids and Polyketides; Limonene and pinene degradation [PATH:ko00903] Metabolism; Biosynthesis of Other Secondary Metabolites; Stilbenoid, diarylheptanoid and gingerol biosynthesis [PATH:ko00945] Metabolism; Xenobiotics Biodegradation and Metabolism; gamma-Hexachlorocyclohexane degradation [PATH:ko00361] Metabolism; Xenobiotics Biodegradation …	COG2124 Cytochrome P450 Q Secondary metabolites biosynthesis, transport and catabolism ;	ORDA_ASPFN O-methylsterigmatocystin oxidoreductase OS=Aspergillus flavus (strain ATCC 200026 / FGSC A1120 / NRRL 3357 / JCM 12722 / SRRC 167) GN=ordA PE=2 SV=1	B0D6B8_LACBS Predicted protein OS=Laccaria bicolor (strain S238N-H82) GN=LACBIDRAFT_248655 PE=3 SV=1	predicted protein [Laccaria bicolor S238N-H82]	IPR001128; Cytochrome P450 IPR002401; Cytochrome P450, E-class, group I IPR017972; Cytochrome P450, conserved site	GO:0004497; monooxygenase activity; Molecular Function GO:0005506; iron ion binding; Molecular Function GO:0009055; electron carrier activity; Molecular Function GO:0020037; heme binding; Molecular Function GO:0055114; oxidation-reduction process; Biological Process
G_lucidum_10008724	PF00067.16;	K00517 E1.14.-.- -- -- Metabolism; Metabolism of Terpenoids and Polyketides; Limonene and pinene degradation [PATH:ko00903] Metabolism; Biosynthesis of Other Secondary Metabolites; Stilbenoid, diarylheptanoid and gingerol biosynthesis [PATH:ko00945] Metabolism; Xenobiotics Biodegradation and Metabolism; gamma-Hexachlorocyclohexane degradation [PATH:ko00361] Metabolism; Xenobiotics Biodegradation …	COG2124 Cytochrome P450 Q Secondary metabolites biosynthesis, transport and catabolism ;	ORDA_ASPFN O-methylsterigmatocystin oxidoreductase OS=Aspergillus flavus (strain ATCC 200026 / FGSC A1120 / NRRL 3357 / JCM 12722 / SRRC 167) GN=ordA PE=2 SV=1	B0D6B8_LACBS Predicted protein OS=Laccaria bicolor (strain S238N-H82) GN=LACBIDRAFT_248655 PE=3 SV=1	predicted protein [Laccaria bicolor S238N-H82]	IPR001128; Cytochrome P450 IPR002401; Cytochrome P450, E-class, group I IPR017972; Cytochrome P450, conserved site	GO:0004497; monooxygenase activity; Molecular Function GO:0005506; iron ion binding; Molecular Function GO:0009055; electron carrier activity; Molecular Function GO:0020037; heme binding; Molecular Function GO:0055114; oxidation-reduction process; Biological Process
G_lucidum_10008725	PF00067.16;	K00517 E1.14.-.- -- -- Metabolism; Metabolism of Terpenoids and Polyketides; Limonene and pinene degradation [PATH:ko00903] Metabolism; Biosynthesis of Other Secondary Metabolites; Stilbenoid, diarylheptanoid and gingerol biosynthesis [PATH:ko00945] Metabolism; Xenobiotics Biodegradation and Metabolism; gamma-Hexachlorocyclohexane degradation [PATH:ko00361] Metabolism; Xenobiotics Biodegradation …	COG2124 Cytochrome P450 Q Secondary metabolites biosynthesis, transport and catabolism ;	ORDA_ASPFN O-methylsterigmatocystin oxidoreductase OS=Aspergillus flavus (strain ATCC 200026 / FGSC A1120 / NRRL 3357 / JCM 12722 / SRRC 167) GN=ordA PE=2 SV=1	B0D6B8_LACBS Predicted protein OS=Laccaria bicolor (strain S238N-H82) GN=LACBIDRAFT_248655 PE=3 SV=1	predicted protein [Laccaria bicolor S238N-H82]	IPR001128; Cytochrome P450 IPR002401; Cytochrome P450, E-class, group I IPR017972; Cytochrome P450, conserved site	GO:0004497; monooxygenase activity; Molecular Function GO:0005506; iron ion binding; Molecular Function GO:0009055; electron carrier activity; Molecular Function GO:0020037; heme binding; Molecular Function GO:0055114; oxidation-reduction process; Biological Process
G_lucidum_10008726	PF00069.19;	K04456 AKT RAC serine/threonine-protein kinase 2.7.11.1 Metabolism; Enzyme Families; Protein kinases [BR:ko01001] Environmental Information Processing; Signal Transduction; MAPK signaling pathway [PATH:ko04010] Environmental Information Processing; Signal Transduction; ErbB signaling pathway [PATH:ko04012] Environmental Information Processing; Signal Transduction; VEGF signaling pathway [PATH:ko0…	NA	AKT2A_XENLA RAC-beta serine/threonine-protein kinase A OS=Xenopus laevis GN=akt2-a PE=2 SV=1	B8P676_POSPM Predicted protein OS=Postia placenta (strain ATCC 44394 / Madison 698-R) GN=POSPLDRAFT_97158 PE=4 SV=1	predicted protein [Postia placenta Mad-698-R]	IPR000719; Protein kinase, catalytic domain IPR002290; Serine/threonine-protein kinase domain IPR008271; Serine/threonine-protein kinase, active site IPR011009; Protein kinase-like domain IPR017441; Protein kinase, ATP binding site IPR017442; Serine/threonine-protein kinase-like domain IPR020635; Tyrosine-protein kinase, catalytic domain	GO:0004672; protein kinase activity; Molecular Function GO:0004674; protein serine/threonine kinase activity; Molecular Function GO:0005524; ATP binding; Molecular Function GO:0006468; protein phosphorylation; Biological Process
G_lucidum_10008727	PF10294.3;	NA	COG3897 Predicted methyltransferase R General function prediction only ;	NNT1_SCHPO Putative nicotinamide N-methyltransferase OS=Schizosaccharomyces pombe GN=nnt1 PE=2 SV=1	B8P0T3_POSPM Predicted protein OS=Postia placenta (strain ATCC 44394 / Madison 698-R) GN=POSPLDRAFT_96530 PE=4 SV=1	predicted protein [Postia placenta Mad-698-R]	IPR019410; Nicotinamide N-methyltransferase, putative	NA
G_lucidum_10008728	NA	NA	NA	NA	D8Q1M3_SCHCO Putative uncharacterized protein (Fragment) OS=Schizophyllum commune H4-8 GN=SCHCODRAFT_108300 PE=4 SV=1	hypothetical protein SCHCODRAFT_108300 [Schizophyllum commune H4-8]	NA	NA
G_lucidum_10008729	NA	NA	NA	NA	B0CTZ6_LACBS Predicted protein OS=Laccaria bicolor (strain S238N-H82) GN=LACBIDRAFT_292035 PE=4 SV=1	predicted protein [Laccaria bicolor S238N-H82]	NA	NA
G_lucidum_10008730	NA	NA	NA	NA	NA	NA	NA	NA
G_lucidum_10008731	PF00067.16;	K00517 E1.14.-.- -- -- Metabolism; Metabolism of Terpenoids and Polyketides; Limonene and pinene degradation [PATH:ko00903] Metabolism; Biosynthesis of Other Secondary Metabolites; Stilbenoid, diarylheptanoid and gingerol biosynthesis [PATH:ko00945] Metabolism; Xenobiotics Biodegradation and Metabolism; gamma-Hexachlorocyclohexane degradation [PATH:ko00361] Metabolism; Xenobiotics Biodegradation …	COG2124 Cytochrome P450 Q Secondary metabolites biosynthesis, transport and catabolism ;	ORDA_ASPFN O-methylsterigmatocystin oxidoreductase OS=Aspergillus flavus (strain ATCC 200026 / FGSC A1120 / NRRL 3357 / JCM 12722 / SRRC 167) GN=ordA PE=2 SV=1	B0D6B8_LACBS Predicted protein OS=Laccaria bicolor (strain S238N-H82) GN=LACBIDRAFT_248655 PE=3 SV=1	predicted protein [Laccaria bicolor S238N-H82]	IPR001128; Cytochrome P450 IPR002401; Cytochrome P450, E-class, group I IPR017972; Cytochrome P450, conserved site	GO:0004497; monooxygenase activity; Molecular Function GO:0005506; iron ion binding; Molecular Function GO:0009055; electron carrier activity; Molecular Function GO:0020037; heme binding; Molecular Function GO:0055114; oxidation-reduction process; Biological Process
G_lucidum_10008732	PF02146.1;	K11414 SIRT4, SIR2L4 NAD-dependent deacetylase sirtuin 4 3.5.1.- Genetic Information Processing; Replication and Repair; Chromosome [BR:ko03036]	COG0846 NAD-dependent protein deacetylases, SIR2 family K Transcription ;	SIRT4_MOUSE NAD-dependent ADP-ribosyltransferase sirtuin-4 OS=Mus musculus GN=Sirt4 PE=1 SV=2	D8Q1N0_SCHCO Putative uncharacterized protein OS=Schizophyllum commune H4-8 GN=SCHCODRAFT_256939 PE=4 SV=1	hypothetical protein SCHCODRAFT_256939 [Schizophyllum commune H4-8]	IPR003000; NAD-dependent histone deacetylase, silent information regulator Sir2	GO:0006342; chromatin silencing; Biological Process GO:0006476; protein deacetylation; Biological Process GO:0008270; zinc ion binding; Molecular Function GO:0016811; hydrolase activity, acting on carbon-nitrogen (but not peptide) bonds, in linear amides; Molecular Function GO:0045449; regulation of transcription; Biological Process GO:0070403; NAD binding; Molecular Function
G_lucidum_10008733	NA	K13341 PEX7, PTS2R peroxin-7 -- Cellular Processes; Transport and Catabolism; Peroxisome [PATH:ko04146]	NA	NA	D6RNV1_COPC7 Peroxin 7 OS=Coprinopsis cinerea (strain Okayama-7 / 130 / FGSC 9003) GN=CC1G_14826 PE=4 SV=1	peroxin 7 [Coprinopsis cinerea okayama7#130]	NA	NA
G_lucidum_10008734	PF00400.26;	K13341 PEX7, PTS2R peroxin-7 -- Cellular Processes; Transport and Catabolism; Peroxisome [PATH:ko04146]	NA	PEX7_PICPA Peroxisomal targeting signal 2 receptor OS=Pichia pastoris GN=PEX7 PE=3 SV=1	D6RNV1_COPC7 Peroxin 7 OS=Coprinopsis cinerea (strain Okayama-7 / 130 / FGSC 9003) GN=CC1G_14826 PE=4 SV=1	peroxin 7 [Coprinopsis cinerea okayama7#130]	IPR001680; WD40 repeat IPR011046; WD40 repeat-like-containing domain IPR015943; WD40/YVTN repeat-like-containing domain IPR017986; WD40-repeat-containing domain IPR019775; WD40 repeat, conserved site IPR019781; WD40 repeat, subgroup IPR019782; WD40 repeat 2 IPR020472; G-protein beta WD-40 repeat	GO:0005515; protein binding; Molecular Function
G_lucidum_10008735	PF00722.15;	K01180 E3.2.1.6 endo-1,3(4)-beta-glucanase 3.2.1.6 Unclassified; Metabolism; Others	NA	YHZ7_SCHPO Probable glycosidase C21B10.07 OS=Schizosaccharomyces pombe GN=SPBC21B10.07 PE=2 SV=1	B8P0T4_POSPM Putative uncharacterized protein OS=Postia placenta (strain ATCC 44394 / Madison 698-R) GN=POSPLDRAFT_120595 PE=4 SV=1	hypothetical protein POSPLDRAFT_120595 [Postia placenta Mad-698-R]	IPR000757; Glycoside hydrolase, family 16 IPR008985; Concanavalin A-like lectin/glucanase IPR013320; Concanavalin A-like lectin/glucanase, subgroup	GO:0004553; hydrolase activity, hydrolyzing O-glycosyl compounds; Molecular Function GO:0005975; carbohydrate metabolic process; Biological Process
G_lucidum_10008736	PF03443.8;	K01238 E3.2.1.- -- -- Unclassified; Metabolism; Others	NA	EGLD_EMENI Endo-beta-1,4-glucanase D OS=Emericella nidulans GN=eglD PE=1 SV=1	A8PFT1_COPC7 Putative uncharacterized protein OS=Coprinopsis cinerea (strain Okayama-7 / 130 / FGSC 9003) GN=CC1G_04849 PE=4 SV=1	hypothetical protein CC1G_04849 [Coprinopsis cinerea okayama7#130]	IPR005103; Glycoside hydrolase, family 61	NA
G_lucidum_10008737	PF00145.11;PF00176.17;	K01529 E3.6.1.- -- -- Unclassified; Metabolism; Others	COG0553 Superfamily II DNA/RNA helicases, SNF2 family KL Transcription ; Replication, recombination and repair ;	YF2C_SCHPO Uncharacterized ATP-dependent helicase C17A2.12 OS=Schizosaccharomyces pombe GN=SPAC17A2.12 PE=2 SV=1	B8P7F7_POSPM Predicted protein OS=Postia placenta (strain ATCC 44394 / Madison 698-R) GN=POSPLDRAFT_100986 PE=4 SV=1	predicted protein [Postia placenta Mad-698-R]	IPR000330; SNF2-related IPR001525; C-5 cytosine methyltransferase IPR006569; RNA polymerase II, large subunit, CTD IPR008942; ENTH/VHS IPR014001; DEAD-like helicase, N-terminal	GO:0003677; DNA binding; Molecular Function GO:0005524; ATP binding; Molecular Function GO:0006306; DNA methylation; Biological Process
G_lucidum_10008738	PF01569.15;	K01080 E3.1.3.4, PPAP2 phosphatidate phosphatase 3.1.3.4 Metabolism; Lipid Metabolism; Glycerolipid metabolism [PATH:ko00561] Metabolism; Lipid Metabolism; Glycerophospholipid metabolism [PATH:ko00564] Metabolism; Lipid Metabolism; Ether lipid metabolism [PATH:ko00565] Metabolism; Lipid Metabolism; Sphingolipid metabolism [PATH:ko00600] Organismal Systems; Immune System; Fc gamma R-mediated phago…	COG0671 Membrane-associated phospholipid phosphatase I Lipid transport and metabolism ;	LPP3_ARATH Putative lipid phosphate phosphatase 3, chloroplastic OS=Arabidopsis thaliana GN=LPP3 PE=2 SV=1	A8N8Z8_COPC7 Lipid phosphate phosphatase 1 OS=Coprinopsis cinerea (strain Okayama-7 / 130 / FGSC 9003) GN=CC1G_00873 PE=4 SV=2	lipid phosphate phosphatase 1 [Coprinopsis cinerea okayama7#130]	IPR000326; Phosphatidic acid phosphatase type 2/haloperoxidase IPR016118; Phosphatidic acid phosphatase/chloroperoxidase, N-terminal	GO:0003824; catalytic activity; Molecular Function GO:0016020; membrane; Cellular Component
G_lucidum_10008739	PF11989.2;PF06248.7;	K11578 ZW10 centromere/kinetochore protein ZW10 -- Genetic Information Processing; Replication and Repair; Chromosome [BR:ko03036]	NA	ZW10_HUMAN Centromere/kinetochore protein zw10 homolog OS=Homo sapiens GN=ZW10 PE=1 SV=3	B0CTX8_LACBS Predicted protein OS=Laccaria bicolor (strain S238N-H82) GN=LACBIDRAFT_305315 PE=4 SV=1	predicted protein [Laccaria bicolor S238N-H82]	IPR009361; RZZ complex, subunit Zw10 IPR021876; Retrograde transport protein Dsl1 C-terminal	GO:0000775; chromosome, centromeric region; Cellular Component GO:0005634; nucleus; Cellular Component GO:0007067; mitosis; Biological Process
G_lucidum_10008740	NA	NA	NA	NA	B8P6H0_POSPM Predicted protein OS=Postia placenta (strain ATCC 44394 / Madison 698-R) GN=POSPLDRAFT_94667 PE=4 SV=1	predicted protein [Postia placenta Mad-698-R]	IPR002198; Short-chain dehydrogenase/reductase SDR IPR016040; NAD(P)-binding domain	GO:0003824; catalytic activity; Molecular Function GO:0005488; binding; Molecular Function GO:0008152; metabolic process; Biological Process GO:0016491; oxidoreductase activity; Molecular Function
G_lucidum_10008741	PF00106.19;	K00540 E1.-.-.- -- -- Unclassified; Metabolism; Others	NA	YQ53_SCHPO Uncharacterized oxidoreductase C162.03 OS=Schizosaccharomyces pombe GN=SPCC162.03 PE=2 SV=1	B8P7R6_POSPM Predicted protein OS=Postia placenta (strain ATCC 44394 / Madison 698-R) GN=POSPLDRAFT_90033 PE=3 SV=1	predicted protein [Postia placenta Mad-698-R]	IPR002198; Short-chain dehydrogenase/reductase SDR IPR002347; Glucose/ribitol dehydrogenase IPR016040; NAD(P)-binding domain IPR020904; Short-chain dehydrogenase/reductase, conserved site	GO:0003824; catalytic activity; Molecular Function GO:0005488; binding; Molecular Function GO:0008152; metabolic process; Biological Process GO:0016491; oxidoreductase activity; Molecular Function GO:0055114; oxidation-reduction process; Biological Process
G_lucidum_10008742	PF08542.5;PF00004.23;	K10756 RFC3_5 replication factor C subunit 3/5 -- Genetic Information Processing; Replication and Repair; DNA replication [PATH:ko03030] Genetic Information Processing; Replication and Repair; DNA replication proteins [BR:ko03032] Genetic Information Processing; Replication and Repair; Chromosome [BR:ko03036] Genetic Information Processing; Replication and Repair; Nucleotide excision repair [PATH…	COG0470 ATPase involved in DNA replication L Replication, recombination and repair ;	RFC3_SCHPO Replication factor C subunit 3 OS=Schizosaccharomyces pombe GN=rfc3 PE=1 SV=2	B8P7F6_POSPM Predicted protein OS=Postia placenta (strain ATCC 44394 / Madison 698-R) GN=POSPLDRAFT_89704 PE=4 SV=1	predicted protein [Postia placenta Mad-698-R]	IPR003593; ATPase, AAA+ type, core IPR003959; ATPase, AAA-type, core IPR008921; DNA polymerase III, clamp loader complex, gamma/delta/delta subunit, C-terminal IPR013748; Replication factor C	GO:0000166; nucleotide binding; Molecular Function GO:0003677; DNA binding; Molecular Function GO:0003689; DNA clamp loader activity; Molecular Function GO:0005524; ATP binding; Molecular Function GO:0005663; DNA replication factor C complex; Cellular Component GO:0006260; DNA replication; Biological Process GO:0017111; nucleoside-triphosphatase activity; Molecular Function
G_lucidum_10008743	PF00240.17;PF01599.13;	K02977 RP-S27Ae, RPS27A small subunit ribosomal protein S27Ae -- Genetic Information Processing; Translation; Ribosome [PATH:ko03010] Genetic Information Processing; Translation; Ribosome [BR:ko03011]	COG5272 Ubiquitin O Posttranslational modification, protein turnover, chaperones ;	RS27A_CHICK Ubiquitin-40S ribosomal protein S27a OS=Gallus gallus GN=RPS27A PE=2 SV=3	B8P0U2_POSPM Ubiquitin/40s ribosomal protein S27a fusion OS=Postia placenta (strain ATCC 44394 / Madison 698-R) GN=POSPLDRAFT_107500 PE=4 SV=1	ubiquitin/40s ribosomal protein S27a fusion [Postia placenta Mad-698-R]	IPR000626; Ubiquitin IPR002906; Ribosomal protein S27a IPR019954; Ubiquitin conserved site IPR019955; Ubiquitin supergroup IPR019956; Ubiquitin subgroup	GO:0003735; structural constituent of ribosome; Molecular Function GO:0005515; protein binding; Molecular Function GO:0005622; intracellular; Cellular Component GO:0005840; ribosome; Cellular Component GO:0006412; translation; Biological Process
G_lucidum_10008744	NA	NA	NA	NA	B0CTY5_LACBS Predicted protein OS=Laccaria bicolor (strain S238N-H82) GN=LACBIDRAFT_292032 PE=4 SV=1	predicted protein [Laccaria bicolor S238N-H82]	NA	NA
G_lucidum_10008745	NA	NA	NA	NA	B8P0U1_POSPM Predicted protein OS=Postia placenta (strain ATCC 44394 / Madison 698-R) GN=POSPLDRAFT_88853 PE=4 SV=1	predicted protein [Postia placenta Mad-698-R]	NA	NA
G_lucidum_10008746	NA	NA	NA	NA	B8P7F4_POSPM Predicted protein OS=Postia placenta (strain ATCC 44394 / Madison 698-R) GN=POSPLDRAFT_89703 PE=4 SV=1	predicted protein [Postia placenta Mad-698-R]	NA	NA
G_lucidum_10008747	PF12460.2;	NA	NA	MMS19_MOUSE MMS19 nucleotide excision repair protein homolog OS=Mus musculus GN=Mms19 PE=1 SV=1	B0CU71_LACBS Predicted protein (Fragment) OS=Laccaria bicolor (strain S238N-H82) GN=LACBIDRAFT_243929 PE=4 SV=1	predicted protein [Laccaria bicolor S238N-H82]	IPR011989; Armadillo-like helical IPR016024; Armadillo-type fold	GO:0005488; binding; Molecular Function
G_lucidum_10008748	NA	NA	NA	NA	D8Q584_SCHCO Putative uncharacterized protein OS=Schizophyllum commune H4-8 GN=SCHCODRAFT_82302 PE=4 SV=1	hypothetical protein SCHCODRAFT_82302 [Schizophyllum commune H4-8]	NA	NA
G_lucidum_10008749	PF02636.11;	K10589 UBE3C ubiquitin-protein ligase E3 C 6.3.2.19 Genetic Information Processing; Folding, Sorting and Degradation; Ubiquitin mediated proteolysis [PATH:ko04120] Genetic Information Processing; Folding, Sorting and Degradation; Ubiquitin system [BR:ko04121]	NA	MIDA_SCHPO Protein midA homolog OS=Schizosaccharomyces pombe GN=SPAC25A8.03c PE=2 SV=2	B0CU70_LACBS Predicted protein OS=Laccaria bicolor (strain S238N-H82) GN=LACBIDRAFT_182268 PE=4 SV=1	predicted protein [Laccaria bicolor S238N-H82]	IPR003788; Protein of unknown function DUF185	NA
G_lucidum_10008750	NA	NA	NA	NA	B8P7G1_POSPM Predicted protein OS=Postia placenta (strain ATCC 44394 / Madison 698-R) GN=POSPLDRAFT_100990 PE=4 SV=1	predicted protein [Postia placenta Mad-698-R]	NA	NA
G_lucidum_10008751	NA	NA	NA	NA	NA	NA	NA	NA
G_lucidum_10008752	PF03647.7;	NA	COG5548 Small integral membrane protein S Function unknown ;	YK45_SCHPO UPF0136 membrane protein P14E8.05c OS=Schizosaccharomyces pombe GN=SPAP14E8.05c PE=2 SV=1	B0CUA4_LACBS Predicted protein OS=Laccaria bicolor (strain S238N-H82) GN=LACBIDRAFT_305463 PE=4 SV=1	predicted protein [Laccaria bicolor S238N-H82]	IPR005349; Uncharacterised protein family UPF0136, Transmembrane	GO:0016020; membrane; Cellular Component
G_lucidum_10008753	PF12847.1;	K01415 E3.4.24.71, ECE1, ECE2 endothelin-converting enzyme 3.4.24.71 Metabolism; Enzyme Families; Peptidases [BR:ko01002]	NA	MTL13_BOVIN Methyltransferase-like protein 13 OS=Bos taurus GN=METTL13 PE=2 SV=1	B8P0U4_POSPM Predicted protein OS=Postia placenta (strain ATCC 44394 / Madison 698-R) GN=POSPLDRAFT_88860 PE=4 SV=1	predicted protein [Postia placenta Mad-698-R]	IPR013216; Methyltransferase type 11	GO:0008152; metabolic process; Biological Process GO:0008168; methyltransferase activity; Molecular Function
G_lucidum_10008754	PF00654.14;	K05393 CLCNF chloride channel, other eukaryote -- Environmental Information Processing; Signaling Molecules and Interaction; Ion channels [BR:ko04040]	COG0038 Chloride channel protein EriC P Inorganic ion transport and metabolism ;	CLCN3_RABIT H(+)/Cl(-) exchange transporter 3 OS=Oryctolagus cuniculus GN=CLCN3 PE=2 SV=3	B0CU98_LACBS Cl-channel protein OS=Laccaria bicolor (strain S238N-H82) GN=LACBIDRAFT_305456 PE=4 SV=1	Cl-channel protein [Laccaria bicolor S238N-H82]	IPR001807; Chloride channel, voltage gated IPR014743; Chloride channel, core	GO:0005216; ion channel activity; Molecular Function GO:0005247; voltage-gated chloride channel activity; Molecular Function GO:0006821; chloride transport; Biological Process GO:0016020; membrane; Cellular Component GO:0055085; transmembrane transport; Biological Process
G_lucidum_10008755	NA	NA	NA	NA	NA	NA	NA	NA
G_lucidum_10008756	PF00782.14;	K01090 E3.1.3.16 protein phosphatase 3.1.3.16 Unclassified; Metabolism; Others	COG2453 Predicted protein-tyrosine phosphatase T Signal transduction mechanisms ;	DUS13_MOUSE Dual specificity protein phosphatase 13 OS=Mus musculus GN=Dusp13 PE=1 SV=1	B8P7G2_POSPM Predicted protein OS=Postia placenta (strain ATCC 44394 / Madison 698-R) GN=POSPLDRAFT_100991 PE=4 SV=1	predicted protein [Postia placenta Mad-698-R]	IPR000340; Dual specificity phosphatase, catalytic domain IPR000387; Dual-specific/protein-tyrosine phosphatase, conserved region IPR016130; Protein-tyrosine phosphatase, active site IPR020422; Dual specificity phosphatase, subgroup, catalytic domain	GO:0004725; protein tyrosine phosphatase activity; Molecular Function GO:0006470; protein dephosphorylation; Biological Process GO:0008138; protein tyrosine/serine/threonine phosphatase activity; Molecular Function GO:0016311; dephosphorylation; Biological Process GO:0016791; phosphatase activity; Molecular Function
G_lucidum_10008757	NA	NA	NA	NA	D8PPY9_SCHCO Putative uncharacterized protein OS=Schizophyllum commune H4-8 GN=SCHCODRAFT_49478 PE=4 SV=1	hypothetical protein SCHCODRAFT_49478 [Schizophyllum commune H4-8]	NA	NA
G_lucidum_10008758	PF00450.16;	K01289 E3.4.16.- carboxypeptidase 3.4.16.- Unclassified; Metabolism; Amino acid metabolism	COG2939 Carboxypeptidase C (cathepsin A) E Amino acid transport and metabolism ;	CBP22_HORVU Serine carboxypeptidase II-2 (Fragment) OS=Hordeum vulgare GN=CXP;2-2 PE=1 SV=1	B0CU43_LACBS Predicted protein OS=Laccaria bicolor (strain S238N-H82) GN=LACBIDRAFT_292054 PE=4 SV=1	predicted protein [Laccaria bicolor S238N-H82]	IPR001563; Peptidase S10, serine carboxypeptidase IPR018202; Peptidase S10, serine carboxypeptidase, active site	GO:0004185; serine-type carboxypeptidase activity; Molecular Function GO:0006508; proteolysis; Biological Process
G_lucidum_10008759	PF10018.3;	NA	NA	NA	B8P0U5_POSPM Predicted protein (Fragment) OS=Postia placenta (strain ATCC 44394 / Madison 698-R) GN=POSPLDRAFT_28122 PE=4 SV=1	predicted protein [Postia placenta Mad-698-R]	IPR019258; Mediator complex, subunit Med4	GO:0006357; regulation of transcription from RNA polymerase II promoter; Biological Process GO:0016455; RNA polymerase II transcription mediator activity; Molecular Function GO:0016592; mediator complex; Cellular Component
G_lucidum_10008760	PF00569.11;PF00564.18;	NA	NA	NA	B0CU66_LACBS Predicted protein OS=Laccaria bicolor (strain S238N-H82) GN=LACBIDRAFT_305418 PE=4 SV=1	predicted protein [Laccaria bicolor S238N-H82]	IPR000270; Phox/Bem1p IPR000433; Zinc finger, ZZ-type	GO:0005515; protein binding; Molecular Function GO:0008270; zinc ion binding; Molecular Function
G_lucidum_10008761	PF00106.19;	K00218 E1.3.1.33, por protochlorophyllide reductase 1.3.1.33 Metabolism; Metabolism of Cofactors and Vitamins; Porphyrin and chlorophyll metabolism [PATH:ko00860]	NA	YJCD_SCHPO Uncharacterized oxidoreductase C736.13 OS=Schizosaccharomyces pombe GN=SPCC736.13 PE=2 SV=1	B8PD11_POSPM Predicted protein OS=Postia placenta (strain ATCC 44394 / Madison 698-R) GN=POSPLDRAFT_90606 PE=4 SV=1	predicted protein [Postia placenta Mad-698-R]	IPR002198; Short-chain dehydrogenase/reductase SDR IPR002347; Glucose/ribitol dehydrogenase IPR016040; NAD(P)-binding domain	GO:0003824; catalytic activity; Molecular Function GO:0005488; binding; Molecular Function GO:0008152; metabolic process; Biological Process GO:0016491; oxidoreductase activity; Molecular Function GO:0055114; oxidation-reduction process; Biological Process
G_lucidum_10008762	NA	NA	NA	YO048_YEAST Uncharacterized membrane protein YOL048C OS=Saccharomyces cerevisiae GN=YOL048C PE=1 SV=2	Q5KJ24_CRYNE Expressed protein OS=Cryptococcus neoformans GN=CNBD5390 PE=4 SV=1	hypothetical protein CGB_D3140W [Cryptococcus gattii WM276]	IPR007496; Uncharacterised protein family CysZ	GO:0009276; Gram-negative-bacterium-type cell wall; Cellular Component GO:0016021; integral to membrane; Cellular Component GO:0019344; cysteine biosynthetic process; Biological Process
G_lucidum_10008763	PF01522.15;	K01452 E3.5.1.41, CDA1 chitin deacetylase 3.5.1.41 Metabolism; Carbohydrate Metabolism; Amino sugar and nucleotide sugar metabolism [PATH:ko00520]	COG0726 Predicted xylanase/chitin deacetylase G Carbohydrate transport and metabolism ;	CDA_MUCRO Chitin deacetylase OS=Mucor rouxii PE=1 SV=1	B0CU46_LACBS Carbohydrate esterase family 4 protein OS=Laccaria bicolor (strain S238N-H82) GN=LACBIDRAFT_229432 PE=4 SV=1	carbohydrate esterase family 4 protein [Laccaria bicolor S238N-H82]	IPR002509; Polysaccharide deacetylase IPR011330; Glycoside hydrolase/deacetylase, beta/alpha-barrel	GO:0003824; catalytic activity; Molecular Function GO:0005975; carbohydrate metabolic process; Biological Process GO:0016810; hydrolase activity, acting on carbon-nitrogen (but not peptide) bonds; Molecular Function
G_lucidum_10008764	PF00995.17;	K12479 VPS45 vacuolar protein sorting-associated protein 45 -- Cellular Processes; Transport and Catabolism; Endocytosis [PATH:ko04144]	COG5158 Proteins involved in synaptic transmission and general secretion, Sec1 family U Intracellular trafficking, secretion, and vesicular transport ;	SEC1_SCHPO Protein transport protein sec1 OS=Schizosaccharomyces pombe GN=sec1 PE=2 SV=1	A8N9H9_COPC7 Ras opposite OS=Coprinopsis cinerea (strain Okayama-7 / 130 / FGSC 9003) GN=CC1G_09014 PE=4 SV=1	Ras opposite [Coprinopsis cinerea okayama7#130]	IPR001619; Sec1-like protein	GO:0006904; vesicle docking involved in exocytosis; Biological Process GO:0016192; vesicle-mediated transport; Biological Process
G_lucidum_10008765	PF00780.16;PF00621.14;PF00610.15;	K07532 ARHGEF12, LARG Rho guanine nucleotide exchange factor 12 -- Cellular Processes; Cell Motility; Regulation of actin cytoskeleton [PATH:ko04810] Organismal Systems; Circulatory System; Vascular smooth muscle contraction [PATH:ko04270] Organismal Systems; Development; Axon guidance [PATH:ko04360]	COG5422 RhoGEF, Guanine nucleotide exchange factor for Rho/Rac/Cdc42-like GTPases T Signal transduction mechanisms ;	RGF1_SCHPO Rho1 guanine nucleotide exchange factor 1 OS=Schizosaccharomyces pombe GN=rgf1 PE=1 SV=1	D6RNQ8_COPC7 RhoGEF Rgf2 OS=Coprinopsis cinerea (strain Okayama-7 / 130 / FGSC 9003) GN=CC1G_14847 PE=4 SV=1	RhoGEF Rgf2 [Coprinopsis cinerea okayama7#130]	IPR000219; Dbl homology (DH) domain IPR000591; DEP domain IPR001180; Citron-like IPR001849; Pleckstrin homology domain IPR011991; Winged helix-turn-helix transcription repressor DNA-binding IPR011993; Pleckstrin homology-type	GO:0005083; small GTPase regulator activity; Molecular Function GO:0005089; Rho guanyl-nucleotide exchange factor activity; Molecular Function GO:0005515; protein binding; Molecular Function GO:0005622; intracellular; Cellular Component GO:0023034; intracellular signaling pathway; Biological Process GO:0035023; regulation of Rho protein signal transduction; Biological Process
G_lucidum_10008766	PF00755.1;	K00624 E2.3.1.7 carnitine O-acetyltransferase 2.3.1.7 Cellular Processes; Transport and Catabolism; Peroxisome [PATH:ko04146]	NA	CACP_CANTR Carnitine O-acetyltransferase, mitochondrial OS=Candida tropicalis GN=CAT2 PE=3 SV=1	A8N9S9_COPC7 Carnitine acetyl transferase OS=Coprinopsis cinerea (strain Okayama-7 / 130 / FGSC 9003) GN=CC1G_11582 PE=3 SV=2	carnitine acetyl transferase [Coprinopsis cinerea okayama7#130]	IPR000542; Acyltransferase ChoActase/COT/CPT	GO:0008415; acyltransferase activity; Molecular Function
G_lucidum_10008767	PF00755.1;	K00624 E2.3.1.7 carnitine O-acetyltransferase 2.3.1.7 Cellular Processes; Transport and Catabolism; Peroxisome [PATH:ko04146]	NA	CACP_CANTR Carnitine O-acetyltransferase, mitochondrial OS=Candida tropicalis GN=CAT2 PE=3 SV=1	B0CU67_LACBS Predicted protein OS=Laccaria bicolor (strain S238N-H82) GN=LACBIDRAFT_244106 PE=4 SV=1	predicted protein [Laccaria bicolor S238N-H82]	IPR000542; Acyltransferase ChoActase/COT/CPT	GO:0008415; acyltransferase activity; Molecular Function
G_lucidum_10008768	PF00240.17;PF08325.4;	NA	NA	YQ77_SCHPO Ubiquitin and WLM domain-containing protein C1442.07c OS=Schizosaccharomyces pombe GN=SPCC1442.07c PE=2 SV=1	D6RNN9_COPC7 Putative uncharacterized protein OS=Coprinopsis cinerea (strain Okayama-7 / 130 / FGSC 9003) GN=CC1G_14811 PE=4 SV=1	hypothetical protein CC1G_14811 [Coprinopsis cinerea okayama7#130]	IPR000626; Ubiquitin IPR013536; WLM IPR019955; Ubiquitin supergroup	GO:0005515; protein binding; Molecular Function
G_lucidum_10008769	NA	NA	NA	NA	D6RNU9_COPC7 Putative uncharacterized protein OS=Coprinopsis cinerea (strain Okayama-7 / 130 / FGSC 9003) GN=CC1G_14824 PE=4 SV=1	hypothetical protein CC1G_14824 [Coprinopsis cinerea okayama7#130]	NA	NA
G_lucidum_10008770	PF00226.25;	NA	COG2214 DnaJ-class molecular chaperone O Posttranslational modification, protein turnover, chaperones ;	YAY1_SCHPO Uncharacterized J domain-containing protein C4H3.01 OS=Schizosaccharomyces pombe GN=SPAC4H3.01 PE=1 SV=1	B0CU14_LACBS Predicted protein OS=Laccaria bicolor (strain S238N-H82) GN=LACBIDRAFT_305357 PE=4 SV=1	predicted protein [Laccaria bicolor S238N-H82]	IPR001623; Heat shock protein DnaJ, N-terminal IPR015609; Molecular chaperone, heat shock protein, Hsp40, DnaJ	GO:0031072; heat shock protein binding; Molecular Function
G_lucidum_10008771	NA	NA	NA	NA	NA	NA	NA	NA
G_lucidum_10008772	NA	NA	NA	NA	NA	NA	NA	NA
G_lucidum_10008773	PF00651.25;	NA	NA	NA	B8P0R1_POSPM Predicted protein OS=Postia placenta (strain ATCC 44394 / Madison 698-R) GN=POSPLDRAFT_96498 PE=4 SV=1	predicted protein [Postia placenta Mad-698-R]	IPR000210; BTB/POZ-like IPR011333; BTB/POZ fold IPR013069; BTB/POZ	GO:0005515; protein binding; Molecular Function
G_lucidum_10008774	PF00067.16;	K00517 E1.14.-.- -- -- Metabolism; Metabolism of Terpenoids and Polyketides; Limonene and pinene degradation [PATH:ko00903] Metabolism; Biosynthesis of Other Secondary Metabolites; Stilbenoid, diarylheptanoid and gingerol biosynthesis [PATH:ko00945] Metabolism; Xenobiotics Biodegradation and Metabolism; gamma-Hexachlorocyclohexane degradation [PATH:ko00361] Metabolism; Xenobiotics Biodegradation …	COG2124 Cytochrome P450 Q Secondary metabolites biosynthesis, transport and catabolism ;	ORDA_ASPFN O-methylsterigmatocystin oxidoreductase OS=Aspergillus flavus (strain ATCC 200026 / FGSC A1120 / NRRL 3357 / JCM 12722 / SRRC 167) GN=ordA PE=2 SV=1	A8P027_COPC7 Cytochrome P450 OS=Coprinopsis cinerea (strain Okayama-7 / 130 / FGSC 9003) GN=CC1G_11452 PE=3 SV=2	cytochrome P450 [Postia placenta]	IPR001128; Cytochrome P450 IPR002401; Cytochrome P450, E-class, group I IPR017972; Cytochrome P450, conserved site	GO:0004497; monooxygenase activity; Molecular Function GO:0005506; iron ion binding; Molecular Function GO:0009055; electron carrier activity; Molecular Function GO:0020037; heme binding; Molecular Function GO:0055114; oxidation-reduction process; Biological Process
G_lucidum_10008775	NA	NA	NA	NA	B8PI61_POSPM Predicted protein OS=Postia placenta (strain ATCC 44394 / Madison 698-R) GN=POSPLDRAFT_98947 PE=4 SV=1	predicted protein [Postia placenta Mad-698-R]	NA	NA
G_lucidum_10008776	PF10294.3;	NA	COG0500 SAM-dependent methyltransferases QR Secondary metabolites biosynthesis, transport and catabolism ; General function prediction only ;	YB9P_YEAST Uncharacterized protein YBR271W OS=Saccharomyces cerevisiae GN=YBR271W PE=1 SV=1	B0DKQ9_LACBS Predicted protein OS=Laccaria bicolor (strain S238N-H82) GN=LACBIDRAFT_252407 PE=4 SV=1	predicted protein [Laccaria bicolor S238N-H82]	IPR019410; Nicotinamide N-methyltransferase, putative	NA
G_lucidum_10008777	PF07976.6;PF01494.13;	K03380 E1.14.13.7 phenol 2-monooxygenase 1.14.13.7 Metabolism; Xenobiotics Biodegradation and Metabolism; Toluene and xylene degradation [PATH:ko00622] Metabolism; Xenobiotics Biodegradation and Metabolism; gamma-Hexachlorocyclohexane degradation [PATH:ko00361] Metabolism; Xenobiotics Biodegradation and Metabolism; Naphthalene and anthracene degradation [PATH:ko00626]	COG0654 2-polyprenyl-6-methoxyphenol hydroxylase and related FAD-dependent oxidoreductases HC Coenzyme transport and metabolism ; Energy production and conversion ;	PH2M_TRICU Phenol 2-monooxygenase OS=Trichosporon cutaneum PE=1 SV=3	B8P5N9_POSPM Predicted protein OS=Postia placenta (strain ATCC 44394 / Madison 698-R) GN=POSPLDRAFT_90902 PE=4 SV=1	predicted protein [Postia placenta Mad-698-R]	IPR002938; Monooxygenase, FAD-binding IPR003042; Aromatic-ring hydroxylase-like IPR012336; Thioredoxin-like fold IPR012941; Phenol hydroxylase, C-terminal dimerisation	GO:0004497; monooxygenase activity; Molecular Function GO:0008152; metabolic process; Biological Process GO:0016491; oxidoreductase activity; Molecular Function GO:0055114; oxidation-reduction process; Biological Process
G_lucidum_10008778	PF00443.23;	K11839 USP8, UBP5 ubiquitin carboxyl-terminal hydrolase 8 3.1.2.15 Metabolism; Enzyme Families; Peptidases [BR:ko01002] Genetic Information Processing; Folding, Sorting and Degradation; Ubiquitin system [BR:ko04121] Cellular Processes; Transport and Catabolism; Endocytosis [PATH:ko04144]	NA	UBP8_MOUSE Ubiquitin carboxyl-terminal hydrolase 8 OS=Mus musculus GN=Usp8 PE=1 SV=2	B8P7I3_POSPM Ubiquitin carboxyl-terminal hydrolase OS=Postia placenta (strain ATCC 44394 / Madison 698-R) GN=POSPLDRAFT_89715 PE=3 SV=1	predicted protein [Postia placenta Mad-698-R]	IPR001394; Peptidase C19, ubiquitin carboxyl-terminal hydrolase 2 IPR001763; Rhodanese-like IPR018200; Peptidase C19, ubiquitin carboxyl-terminal hydrolase 2, conserved site	GO:0004221; ubiquitin thiolesterase activity; Molecular Function GO:0006511; ubiquitin-dependent protein catabolic process; Biological Process
G_lucidum_10008779	PF00628.23;PF00320.21;PF01426.12;	K11380 NTO1 NuA3 HAT complex component NTO1 -- Genetic Information Processing; Replication and Repair; Chromosome [BR:ko03036]	NA	SNT2_SCHPO Lid2 complex component snt2 OS=Schizosaccharomyces pombe GN=snt2 PE=2 SV=1	A8N8P9_COPC7 ZNF1 OS=Coprinopsis cinerea (strain Okayama-7 / 130 / FGSC 9003) GN=CC1G_00774 PE=4 SV=2	ZNF1 [Coprinopsis cinerea okayama7#130]	IPR000679; Zinc finger, GATA-type IPR001025; Bromo adjacent homology (BAH) domain IPR001965; Zinc finger, PHD-type IPR011011; Zinc finger, FYVE/PHD-type IPR013083; Zinc finger, RING/FYVE/PHD-type IPR013088; Zinc finger, NHR/GATA-type	GO:0003677; DNA binding; Molecular Function GO:0003700; sequence-specific DNA binding transcription factor activity; Molecular Function GO:0005515; protein binding; Molecular Function GO:0006355; regulation of transcription, DNA-dependent; Biological Process GO:0008270; zinc ion binding; Molecular Function GO:0043565; sequence-specific DNA binding; Molecular Function
G_lucidum_10008780	PF03660.8;	K12834 PHF5A PHD finger-like domain-containing protein 5A -- Genetic Information Processing; Transcription; Spliceosome [PATH:ko03040] Genetic Information Processing; Transcription; Spliceosome [BR:ko03041]	NA	PHF5_ARATH Uncharacterized protein At1g07170/At2g30000 OS=Arabidopsis thaliana GN=At1g07170 PE=2 SV=1	D6RNX4_COPC7 Pre-mRNA splicing factor ini1 OS=Coprinopsis cinerea (strain Okayama-7 / 130 / FGSC 9003) GN=CC1G_14869 PE=4 SV=1	pre-mRNA splicing factor ini1 [Coprinopsis cinerea okayama7#130]	IPR005345; PHF5-like	NA
G_lucidum_10008781	NA	NA	NA	NA	NA	NA	NA	NA
G_lucidum_10008782	NA	NA	NA	NA	B8P6H0_POSPM Predicted protein OS=Postia placenta (strain ATCC 44394 / Madison 698-R) GN=POSPLDRAFT_94667 PE=4 SV=1	predicted protein [Postia placenta Mad-698-R]	NA	NA
G_lucidum_10008783	NA	NA	NA	GUN5_TRIRE Endoglucanase-5 OS=Trichoderma reesei GN=egl5 PE=3 SV=1	B3Y002_PHACH Endoglucanase V-like protein OS=Phanerochaete chrysosporium GN=egv PE=2 SV=1	endoglucanase V-like protein [Phanerochaete chrysosporium]	IPR007112; Expansin/pollen allergen, DPBB domain IPR009009; Barwin-related endoglucanase IPR014733; Barwin-like endoglucanase	NA
G_lucidum_10008784	PF00202.15;	K00837 E2.6.1.- -- -- Unclassified; Metabolism; Amino acid metabolism	COG0161 Adenosylmethionine-8-amino-7-oxononanoate aminotransferase H Coenzyme transport and metabolism ;	YGD3_SCHPO Uncharacterized aminotransferase C1771.03c OS=Schizosaccharomyces pombe GN=SPBC1773.03c PE=2 SV=1	B0CU63_LACBS Predicted protein OS=Laccaria bicolor (strain S238N-H82) GN=LACBIDRAFT_305415 PE=3 SV=1	predicted protein [Laccaria bicolor S238N-H82]	IPR005814; Aminotransferase class-III IPR015421; Pyridoxal phosphate-dependent transferase, major region, subdomain 1 IPR015422; Pyridoxal phosphate-dependent transferase, major region, subdomain 2 IPR015424; Pyridoxal phosphate-dependent transferase, major domain	GO:0003824; catalytic activity; Molecular Function GO:0008483; transaminase activity; Molecular Function GO:0030170; pyridoxal phosphate binding; Molecular Function
G_lucidum_10008785	PF00702.1;	K01564 E3.8.1.- -- -- Metabolism; Xenobiotics Biodegradation and Metabolism; Atrazine degradation [PATH:ko00791]	COG1011 Predicted hydrolase (HAD superfamily) R General function prediction only ;	DEH2_MORSB Haloacetate dehalogenase H-2 OS=Moraxella sp. (strain B) GN=dehH2 PE=1 SV=1	Q0U5J0_PHANO Putative uncharacterized protein OS=Phaeosphaeria nodorum GN=SNOG_12974 PE=4 SV=1	hypothetical protein SNOG_12974 [Phaeosphaeria nodorum SN15]	IPR005834; Haloacid dehalogenase-like hydrolase IPR023214; HAD-like domain	GO:0003824; catalytic activity; Molecular Function GO:0008152; metabolic process; Biological Process
G_lucidum_10008786	NA	NA	NA	NA	D8PU79_SCHCO Putative uncharacterized protein OS=Schizophyllum commune H4-8 GN=SCHCODRAFT_51483 PE=4 SV=1	hypothetical protein SCHCODRAFT_51483 [Schizophyllum commune H4-8]	NA	NA
G_lucidum_10008787	PF00004.23;	K03064 PSMC6, RPT4 26S proteasome regulatory subunit T4 -- Genetic Information Processing; Folding, Sorting and Degradation; Proteasome [PATH:ko03050] Genetic Information Processing; Folding, Sorting and Degradation; Proteasome [BR:ko03051]	COG1222 ATP-dependent 26S proteasome regulatory subunit O Posttranslational modification, protein turnover, chaperones ;	PRS10_SCHPO Probable 26S protease subunit rpt4 OS=Schizosaccharomyces pombe GN=rpt4 PE=2 SV=2	A8N9I0_COPC7 ATPase OS=Coprinopsis cinerea (strain Okayama-7 / 130 / FGSC 9003) GN=CC1G_09015 PE=3 SV=1	ATPase [Coprinopsis cinerea okayama7#130]	IPR003593; ATPase, AAA+ type, core IPR003959; ATPase, AAA-type, core IPR003960; ATPase, AAA-type, conserved site IPR005937; 26S proteasome subunit P45	GO:0000166; nucleotide binding; Molecular Function GO:0005524; ATP binding; Molecular Function GO:0005737; cytoplasm; Cellular Component GO:0016787; hydrolase activity; Molecular Function GO:0017111; nucleoside-triphosphatase activity; Molecular Function GO:0030163; protein catabolic process; Biological Process
G_lucidum_10008788	PF00248.15;	K00540 E1.-.-.- -- -- Unclassified; Metabolism; Others	NA	ARK73_RAT Aflatoxin B1 aldehyde reductase member 3 OS=Rattus norvegicus GN=Akr7a3 PE=1 SV=2	Q0C939_ASPTN Predicted protein OS=Aspergillus terreus (strain NIH 2624 / FGSC A1156) GN=ATEG_09795 PE=4 SV=1	predicted protein [Aspergillus terreus NIH2624]	IPR001395; Aldo/keto reductase IPR023210; NADP-dependent oxidoreductase domain	GO:0016491; oxidoreductase activity; Molecular Function GO:0055114; oxidation-reduction process; Biological Process
G_lucidum_10008789	PF12706.1;PF07522.8;	K08282 E2.7.11.1 non-specific serine/threonine protein kinase 2.7.11.1 Unclassified; Cellular Processes and Signaling; Signal transduction mechanisms	COG1236 Predicted exonuclease of the beta-lactamase fold involved in RNA processing J Translation, ribosomal structure and biogenesis ;	PSO2_SCHPO DNA cross-link repair protein pso2/snm1 OS=Schizosaccharomyces pombe GN=pso2 PE=2 SV=3	D8Q156_SCHCO Putative uncharacterized protein (Fragment) OS=Schizophyllum commune H4-8 GN=SCHCODRAFT_53758 PE=4 SV=1	hypothetical protein SCHCODRAFT_53758 [Schizophyllum commune H4-8]	IPR011084; DNA repair metallo-beta-lactamase	NA
G_lucidum_10008790	PF01479.19;PF00900.14;PF08071.6;	K02987 RP-S4e, RPS4 small subunit ribosomal protein S4e -- Genetic Information Processing; Translation; Ribosome [PATH:ko03010] Genetic Information Processing; Translation; Ribosome [BR:ko03011]	COG1471 Ribosomal protein S4E J Translation, ribosomal structure and biogenesis ;	RS4_YARLI 40S ribosomal protein S4 OS=Yarrowia lipolytica GN=RPS4 PE=2 SV=1	B8P7G3_POSPM 40S ribosomal protein S4 OS=Postia placenta (strain ATCC 44394 / Madison 698-R) GN=POSPLDRAFT_135095 PE=4 SV=1	40S ribosomal protein S4 [Postia placenta Mad-698-R]	IPR000876; Ribosomal protein S4e IPR002942; RNA-binding S4 IPR013843; Ribosomal protein S4e, N-terminal IPR013845; Ribosomal protein S4e, central IPR018199; Ribosomal protein S4e, N-terminal, conserved site	GO:0003723; RNA binding; Molecular Function GO:0003735; structural constituent of ribosome; Molecular Function GO:0005622; intracellular; Cellular Component GO:0005840; ribosome; Cellular Component GO:0006412; translation; Biological Process
G_lucidum_10008791	PF12457.2;PF07842.6;PF01585.17;	K13103 TFIP11 tuftelin-interacting protein 11 -- Genetic Information Processing; Transcription; Spliceosome [BR:ko03041]	NA	YKR3_SCHPO G-patch domain-containing protein C1486.03 OS=Schizosaccharomyces pombe GN=SPAC1486.03c PE=2 SV=1	A8N942_COPC7 Sip1/TFIP11 interacting protein OS=Coprinopsis cinerea (strain Okayama-7 / 130 / FGSC 9003) GN=CC1G_00917 PE=4 SV=2	Sip1/TFIP11 interacting protein [Coprinopsis cinerea okayama7#130]	IPR000467; D111/G-patch IPR022159; Tuftelin interacting protein N-terminal IPR022783; GC-rich sequence DNA-binding factor domain	GO:0003676; nucleic acid binding; Molecular Function GO:0003677; DNA binding; Molecular Function GO:0003700; sequence-specific DNA binding transcription factor activity; Molecular Function GO:0005622; intracellular; Cellular Component GO:0005634; nucleus; Cellular Component GO:0045449; regulation of transcription; Biological Process
G_lucidum_10008792	PF00632.19;	K10590 TRIP12 E3 ubiquitin-protein ligase TRIP12 6.3.2.19 Genetic Information Processing; Folding, Sorting and Degradation; Ubiquitin mediated proteolysis [PATH:ko04120] Genetic Information Processing; Folding, Sorting and Degradation; Ubiquitin system [BR:ko04121]	COG5021 Ubiquitin-protein ligase O Posttranslational modification, protein turnover, chaperones ;	UFD4_YEAST Ubiquitin fusion degradation protein 4 OS=Saccharomyces cerevisiae GN=UFD4 PE=1 SV=1	B0CU64_LACBS Predicted protein OS=Laccaria bicolor (strain S238N-H82) GN=LACBIDRAFT_176411 PE=4 SV=1	predicted protein [Laccaria bicolor S238N-H82]	IPR000569; HECT IPR011989; Armadillo-like helical IPR016024; Armadillo-type fold	GO:0005488; binding; Molecular Function GO:0005622; intracellular; Cellular Component GO:0006464; protein modification process; Biological Process GO:0016881; acid-amino acid ligase activity; Molecular Function
G_lucidum_10008793	NA	NA	NA	NA	D8QHH4_SCHCO Putative uncharacterized protein (Fragment) OS=Schizophyllum commune H4-8 GN=SCHCODRAFT_113324 PE=4 SV=1	hypothetical protein SCHCODRAFT_113324 [Schizophyllum commune H4-8]	NA	NA
G_lucidum_10008794	NA	NA	NA	NA	NA	NA	NA	NA
G_lucidum_10008795	PF01370.15;	K00091 E1.1.1.219 dihydroflavonol-4-reductase 1.1.1.219 Metabolism; Biosynthesis of Other Secondary Metabolites; Flavonoid biosynthesis [PATH:ko00941]	COG0451 Nucleoside-diphosphate-sugar epimerases MG Cell wall/membrane/envelope biogenesis ; Carbohydrate transport and metabolism ;	DFRA_DIACA Dihydroflavonol-4-reductase OS=Dianthus caryophyllus GN=A PE=2 SV=1	B0DGL3_LACBS Predicted protein OS=Laccaria bicolor (strain S238N-H82) GN=LACBIDRAFT_300371 PE=4 SV=1	predicted protein [Laccaria bicolor S238N-H82]	IPR001509; NAD-dependent epimerase/dehydratase IPR016040; NAD(P)-binding domain	GO:0003824; catalytic activity; Molecular Function GO:0005488; binding; Molecular Function GO:0008152; metabolic process; Biological Process GO:0044237; cellular metabolic process; Biological Process GO:0050662; coenzyme binding; Molecular Function
G_lucidum_10008796	PF00067.16;	K00517 E1.14.-.- -- -- Metabolism; Metabolism of Terpenoids and Polyketides; Limonene and pinene degradation [PATH:ko00903] Metabolism; Biosynthesis of Other Secondary Metabolites; Stilbenoid, diarylheptanoid and gingerol biosynthesis [PATH:ko00945] Metabolism; Xenobiotics Biodegradation and Metabolism; gamma-Hexachlorocyclohexane degradation [PATH:ko00361] Metabolism; Xenobiotics Biodegradation …	COG2124 Cytochrome P450 Q Secondary metabolites biosynthesis, transport and catabolism ;	ORDA_ASPPA O-methylsterigmatocystin oxidoreductase OS=Aspergillus parasiticus GN=ordA PE=3 SV=1	C7YJK8_NECH7 Predicted protein OS=Nectria haematococca (strain 77-13-4 / FGSC 9596 / MPVI) GN=NECHADRAFT_31801 PE=3 SV=1	hypothetical protein FG10571.1 [Gibberella zeae PH-1]	IPR001128; Cytochrome P450 IPR002401; Cytochrome P450, E-class, group I IPR017972; Cytochrome P450, conserved site	GO:0004497; monooxygenase activity; Molecular Function GO:0005506; iron ion binding; Molecular Function GO:0009055; electron carrier activity; Molecular Function GO:0020037; heme binding; Molecular Function GO:0055114; oxidation-reduction process; Biological Process
G_lucidum_10008797	PF07976.6;PF01494.13;	K03380 E1.14.13.7 phenol 2-monooxygenase 1.14.13.7 Metabolism; Xenobiotics Biodegradation and Metabolism; Toluene and xylene degradation [PATH:ko00622] Metabolism; Xenobiotics Biodegradation and Metabolism; gamma-Hexachlorocyclohexane degradation [PATH:ko00361] Metabolism; Xenobiotics Biodegradation and Metabolism; Naphthalene and anthracene degradation [PATH:ko00626]	COG0654 2-polyprenyl-6-methoxyphenol hydroxylase and related FAD-dependent oxidoreductases HC Coenzyme transport and metabolism ; Energy production and conversion ;	PH2M_TRICU Phenol 2-monooxygenase OS=Trichosporon cutaneum PE=1 SV=3	B8P5N9_POSPM Predicted protein OS=Postia placenta (strain ATCC 44394 / Madison 698-R) GN=POSPLDRAFT_90902 PE=4 SV=1	predicted protein [Postia placenta Mad-698-R]	IPR002938; Monooxygenase, FAD-binding IPR003042; Aromatic-ring hydroxylase-like IPR012336; Thioredoxin-like fold IPR012941; Phenol hydroxylase, C-terminal dimerisation	GO:0004497; monooxygenase activity; Molecular Function GO:0008152; metabolic process; Biological Process GO:0016491; oxidoreductase activity; Molecular Function GO:0055114; oxidation-reduction process; Biological Process
G_lucidum_10008798	NA	NA	NA	NA	NA	NA	NA	NA
G_lucidum_10008799	NA	NA	NA	NA	B8PBU5_POSPM Predicted protein OS=Postia placenta (strain ATCC 44394 / Madison 698-R) GN=POSPLDRAFT_106232 PE=4 SV=1	predicted protein [Postia placenta Mad-698-R]	NA	NA
G_lucidum_10008800	PF00067.16;	K00517 E1.14.-.- -- -- Metabolism; Metabolism of Terpenoids and Polyketides; Limonene and pinene degradation [PATH:ko00903] Metabolism; Biosynthesis of Other Secondary Metabolites; Stilbenoid, diarylheptanoid and gingerol biosynthesis [PATH:ko00945] Metabolism; Xenobiotics Biodegradation and Metabolism; gamma-Hexachlorocyclohexane degradation [PATH:ko00361] Metabolism; Xenobiotics Biodegradation …	NA	ORDA_ASPPA O-methylsterigmatocystin oxidoreductase OS=Aspergillus parasiticus GN=ordA PE=3 SV=1	B0DFK4_LACBS Predicted protein OS=Laccaria bicolor (strain S238N-H82) GN=LACBIDRAFT_251026 PE=3 SV=1	cytochrome P450 [Postia placenta]	IPR001128; Cytochrome P450 IPR002401; Cytochrome P450, E-class, group I	GO:0004497; monooxygenase activity; Molecular Function GO:0005506; iron ion binding; Molecular Function GO:0009055; electron carrier activity; Molecular Function GO:0020037; heme binding; Molecular Function GO:0055114; oxidation-reduction process; Biological Process
G_lucidum_10008801	PF02353.14;	K00574 E2.1.1.79, cfa cyclopropane-fatty-acyl-phospholipid synthase 2.1.1.79 Unclassified; Cellular Processes and Signaling; Membrane and intracellular structural molecules	COG2230 Cyclopropane fatty acid synthase and related methyltransferases M Cell wall/membrane/envelope biogenesis ;	CFA_ECOLI Cyclopropane-fatty-acyl-phospholipid synthase OS=Escherichia coli (strain K12) GN=cfa PE=1 SV=2	A8PGI3_COPC7 Cyclopropane-fatty-acyl-phospholipid synthase OS=Coprinopsis cinerea (strain Okayama-7 / 130 / FGSC 9003) GN=CC1G_11387 PE=4 SV=1	cyclopropane-fatty-acyl-phospholipid synthase [Coprinopsis cinerea okayama7#130]	IPR003333; Cyclopropane-fatty-acyl-phospholipid/mycolic acid synthase	GO:0008610; lipid biosynthetic process; Biological Process
G_lucidum_10008802	NA	NA	NA	NA	B0DG25_LACBS Predicted protein OS=Laccaria bicolor (strain S238N-H82) GN=LACBIDRAFT_300118 PE=4 SV=1	predicted protein [Laccaria bicolor S238N-H82]	NA	NA
G_lucidum_10008803	PF07690.10;	K10866 RAD50 DNA repair protein RAD50 3.6.-.- Genetic Information Processing; Replication and Repair; DNA replication proteins [BR:ko03032] Genetic Information Processing; Replication and Repair; Homologous recombination [PATH:ko03440] Genetic Information Processing; Replication and Repair; Non-homologous end-joining [PATH:ko03450] Genetic Information Processing; Replication and Repair; DNA repai…	COG0477 Permeases of the major facilitator superfamily GEPR Carbohydrate transport and metabolism ; Amino acid transport and metabolism ; Inorganic ion transport and metabolism ; General function prediction only ;	YI32_SCHPO Uncharacterized MFS-type transporter C1399.02 OS=Schizosaccharomyces pombe GN=SPAC1399.02 PE=2 SV=1	D8PZX3_SCHCO Putative uncharacterized protein OS=Schizophyllum commune H4-8 GN=SCHCODRAFT_233429 PE=4 SV=1	hypothetical protein SCHCODRAFT_233429 [Schizophyllum commune H4-8]	IPR001411; Tetracycline resistance protein, TetB IPR005829; Sugar transporter, conserved site IPR011701; Major facilitator superfamily MFS-1 IPR016196; Major facilitator superfamily, general substrate transporter IPR020846; Major facilitator superfamily	GO:0005215; transporter activity; Molecular Function GO:0006810; transport; Biological Process GO:0015520; tetracycline:hydrogen antiporter activity; Molecular Function GO:0015904; tetracycline transport; Biological Process GO:0016020; membrane; Cellular Component GO:0016021; integral to membrane; Cellular Component GO:0046677; response to antibiotic; Biological Process GO:0055085; transmembrane …
G_lucidum_10008804	PF12697.1;	NA	NA	NA	B0D935_LACBS Predicted protein OS=Laccaria bicolor (strain S238N-H82) GN=LACBIDRAFT_296555 PE=4 SV=1	predicted protein [Laccaria bicolor S238N-H82]	NA	NA
G_lucidum_10008805	PF00067.16;	K07422 CYP2U cytochrome P450, family 2, subfamily U -- Metabolism; Lipid Metabolism; Arachidonic acid metabolism [PATH:ko00590] Metabolism; Enzyme Families; Cytochrome P450 [BR:ko00199]	NA	ORDA_ASPFN O-methylsterigmatocystin oxidoreductase OS=Aspergillus flavus (strain ATCC 200026 / FGSC A1120 / NRRL 3357 / JCM 12722 / SRRC 167) GN=ordA PE=2 SV=1	Q0CET7_ASPTN Putative uncharacterized protein OS=Aspergillus terreus (strain NIH 2624 / FGSC A1156) GN=ATEG_07797 PE=3 SV=1	conserved hypothetical protein [Aspergillus terreus NIH2624]	IPR001128; Cytochrome P450 IPR002401; Cytochrome P450, E-class, group I	GO:0004497; monooxygenase activity; Molecular Function GO:0005506; iron ion binding; Molecular Function GO:0009055; electron carrier activity; Molecular Function GO:0020037; heme binding; Molecular Function GO:0055114; oxidation-reduction process; Biological Process
G_lucidum_10008806	NA	NA	NA	NA	NA	NA	NA	NA
G_lucidum_10008807	PF12697.1;	NA	NA	NA	B0D935_LACBS Predicted protein OS=Laccaria bicolor (strain S238N-H82) GN=LACBIDRAFT_296555 PE=4 SV=1	predicted protein [Laccaria bicolor S238N-H82]	NA	NA
G_lucidum_10008808	PF07690.10;	K10866 RAD50 DNA repair protein RAD50 3.6.-.- Genetic Information Processing; Replication and Repair; DNA replication proteins [BR:ko03032] Genetic Information Processing; Replication and Repair; Homologous recombination [PATH:ko03440] Genetic Information Processing; Replication and Repair; Non-homologous end-joining [PATH:ko03450] Genetic Information Processing; Replication and Repair; DNA repai…	NA	YAN6_SCHPO Uncharacterized transporter C3H1.06c OS=Schizosaccharomyces pombe GN=SPAC3H1.06c PE=2 SV=1	Q9UVM6_COPCI Mfs1.1 OS=Coprinopsis cinerea GN=mfs1.1 PE=4 SV=1	Mfs1.1 [Coprinopsis cinerea]	IPR005829; Sugar transporter, conserved site IPR011701; Major facilitator superfamily MFS-1 IPR016196; Major facilitator superfamily, general substrate transporter IPR020846; Major facilitator superfamily	GO:0005215; transporter activity; Molecular Function GO:0006810; transport; Biological Process GO:0016020; membrane; Cellular Component GO:0055085; transmembrane transport; Biological Process
G_lucidum_10008809	NA	NA	NA	NA	A8NLB7_COPC7 Putative uncharacterized protein OS=Coprinopsis cinerea (strain Okayama-7 / 130 / FGSC 9003) GN=CC1G_05783 PE=4 SV=1	hypothetical protein CC1G_05783 [Coprinopsis cinerea okayama7#130]	NA	NA
G_lucidum_10008810	PF02353.14;	K00574 E2.1.1.79, cfa cyclopropane-fatty-acyl-phospholipid synthase 2.1.1.79 Unclassified; Cellular Processes and Signaling; Membrane and intracellular structural molecules	COG2230 Cyclopropane fatty acid synthase and related methyltransferases M Cell wall/membrane/envelope biogenesis ;	CFA_ECOLI Cyclopropane-fatty-acyl-phospholipid synthase OS=Escherichia coli (strain K12) GN=cfa PE=1 SV=2	Q8X1K0_COPCI Putative cyclopropane fatty acid synthase OS=Coprinopsis cinerea GN=cfs1 PE=4 SV=1	putative cyclopropane fatty acid synthase [Coprinopsis cinerea]	IPR003333; Cyclopropane-fatty-acyl-phospholipid/mycolic acid synthase	GO:0008610; lipid biosynthetic process; Biological Process
G_lucidum_10008811	PF00067.16;	K00517 E1.14.-.- -- -- Metabolism; Metabolism of Terpenoids and Polyketides; Limonene and pinene degradation [PATH:ko00903] Metabolism; Biosynthesis of Other Secondary Metabolites; Stilbenoid, diarylheptanoid and gingerol biosynthesis [PATH:ko00945] Metabolism; Xenobiotics Biodegradation and Metabolism; gamma-Hexachlorocyclohexane degradation [PATH:ko00361] Metabolism; Xenobiotics Biodegradation …	NA	ORDA_ASPPA O-methylsterigmatocystin oxidoreductase OS=Aspergillus parasiticus GN=ordA PE=3 SV=1	C8VN98_EMENI Cytochrome P450, putative (Eurofung) OS=Aspergillus nidulans FGSC A4 GN=ANIA_01601 PE=3 SV=1	cytochrome P450 [Postia placenta]	IPR001128; Cytochrome P450 IPR002401; Cytochrome P450, E-class, group I	GO:0004497; monooxygenase activity; Molecular Function GO:0005506; iron ion binding; Molecular Function GO:0009055; electron carrier activity; Molecular Function GO:0020037; heme binding; Molecular Function GO:0055114; oxidation-reduction process; Biological Process
G_lucidum_10008812	PF12697.1;PF01370.15;	K00083 E1.1.1.195 cinnamyl-alcohol dehydrogenase 1.1.1.195 Metabolism; Biosynthesis of Other Secondary Metabolites; Phenylpropanoid biosynthesis [PATH:ko00940]	COG0451 Nucleoside-diphosphate-sugar epimerases MG Cell wall/membrane/envelope biogenesis ; Carbohydrate transport and metabolism ;	YKJ7_SCHPO Putative uncharacterized oxidoreductase C513.07 OS=Schizosaccharomyces pombe GN=SPAC513.07 PE=2 SV=1	B0D935_LACBS Predicted protein OS=Laccaria bicolor (strain S238N-H82) GN=LACBIDRAFT_296555 PE=4 SV=1	predicted protein [Laccaria bicolor S238N-H82]	IPR001509; NAD-dependent epimerase/dehydratase IPR016040; NAD(P)-binding domain	GO:0003824; catalytic activity; Molecular Function GO:0005488; binding; Molecular Function GO:0008152; metabolic process; Biological Process GO:0044237; cellular metabolic process; Biological Process GO:0050662; coenzyme binding; Molecular Function
G_lucidum_10008813	PF00067.16;	K00517 E1.14.-.- -- -- Metabolism; Metabolism of Terpenoids and Polyketides; Limonene and pinene degradation [PATH:ko00903] Metabolism; Biosynthesis of Other Secondary Metabolites; Stilbenoid, diarylheptanoid and gingerol biosynthesis [PATH:ko00945] Metabolism; Xenobiotics Biodegradation and Metabolism; gamma-Hexachlorocyclohexane degradation [PATH:ko00361] Metabolism; Xenobiotics Biodegradation …	COG2124 Cytochrome P450 Q Secondary metabolites biosynthesis, transport and catabolism ;	ORDA_ASPFN O-methylsterigmatocystin oxidoreductase OS=Aspergillus flavus (strain ATCC 200026 / FGSC A1120 / NRRL 3357 / JCM 12722 / SRRC 167) GN=ordA PE=2 SV=1	A8P027_COPC7 Cytochrome P450 OS=Coprinopsis cinerea (strain Okayama-7 / 130 / FGSC 9003) GN=CC1G_11452 PE=3 SV=2	hypothetical protein ANI_1_1054164 [Aspergillus niger CBS 513.88]	IPR001128; Cytochrome P450 IPR002401; Cytochrome P450, E-class, group I IPR017972; Cytochrome P450, conserved site	GO:0004497; monooxygenase activity; Molecular Function GO:0005506; iron ion binding; Molecular Function GO:0009055; electron carrier activity; Molecular Function GO:0020037; heme binding; Molecular Function GO:0055114; oxidation-reduction process; Biological Process
G_lucidum_10008814	PF11559.2;	NA	NA	NA	B8P7H4_POSPM Predicted protein OS=Postia placenta (strain ATCC 44394 / Madison 698-R) GN=POSPLDRAFT_101012 PE=4 SV=1	predicted protein [Postia placenta Mad-698-R]	IPR021622; Afadin/alpha-actinin-binding	NA
G_lucidum_10008815	NA	NA	NA	NA	B8P0G5_POSPM Predicted protein OS=Postia placenta (strain ATCC 44394 / Madison 698-R) GN=POSPLDRAFT_103569 PE=4 SV=1	predicted protein [Postia placenta Mad-698-R]	NA	NA
G_lucidum_10008816	PF01636.17;	NA	NA	NA	B0CV43_LACBS Predicted protein OS=Laccaria bicolor (strain S238N-H82) GN=LACBIDRAFT_322797 PE=4 SV=1	predicted protein [Laccaria bicolor S238N-H82]	IPR002575; Aminoglycoside phosphotransferase	NA
G_lucidum_10008817	NA	NA	NA	TRA1_MAIZE Putative AC transposase OS=Zea mays PE=2 SV=2	A8N0A8_COPC7 Putative uncharacterized protein OS=Coprinopsis cinerea (strain Okayama-7 / 130 / FGSC 9003) GN=CC1G_02877 PE=4 SV=2	hypothetical protein CC1G_02877 [Coprinopsis cinerea okayama7#130]	IPR012337; Ribonuclease H-like	GO:0003676; nucleic acid binding; Molecular Function
G_lucidum_10008818	PF01636.17;	NA	NA	NA	B0CV43_LACBS Predicted protein OS=Laccaria bicolor (strain S238N-H82) GN=LACBIDRAFT_322797 PE=4 SV=1	predicted protein [Laccaria bicolor S238N-H82]	IPR002575; Aminoglycoside phosphotransferase IPR011009; Protein kinase-like domain	NA
G_lucidum_10002310	NA	NA	NA	NA	B8PEH8_POSPM Predicted protein (Fragment) OS=Postia placenta (strain ATCC 44394 / Madison 698-R) GN=POSPLDRAFT_27166 PE=4 SV=1	predicted protein [Postia placenta Mad-698-R]	IPR023114; Elongated TPR repeat-containing domain	NA
G_lucidum_10002311	NA	NA	NA	NA	B8PK38_POSPM Predicted protein OS=Postia placenta (strain ATCC 44394 / Madison 698-R) GN=POSPLDRAFT_94794 PE=4 SV=1	predicted protein [Postia placenta Mad-698-R]	NA	NA
G_lucidum_10002312	NA	NA	NA	NA	D6RNE9_COPC7 Other/FunK1 protein kinase OS=Coprinopsis cinerea (strain Okayama-7 / 130 / FGSC 9003) GN=CC1G_15619 PE=4 SV=1	other/FunK1 protein kinase [Coprinopsis cinerea okayama7#130]	NA	NA
G_lucidum_10002313	NA	NA	NA	NA	NA	NA	NA	NA
G_lucidum_10002314	NA	NA	NA	NA	NA	NA	NA	NA
G_lucidum_10002315	NA	K04460 PPP5C, PP5 protein phosphatase 5 3.1.3.16 Environmental Information Processing; Signal Transduction; MAPK signaling pathway [PATH:ko04010]	NA	TOM34_RAT Mitochondrial import receptor subunit TOM34 OS=Rattus norvegicus GN=Tomm34 PE=2 SV=1	A8PB27_COPC7 Putative uncharacterized protein OS=Coprinopsis cinerea (strain Okayama-7 / 130 / FGSC 9003) GN=CC1G_12852 PE=4 SV=1	hypothetical protein CC1G_12852 [Coprinopsis cinerea okayama7#130]	IPR011990; Tetratricopeptide-like helical IPR013026; Tetratricopeptide repeat-containing IPR019734; Tetratricopeptide repeat	GO:0005488; binding; Molecular Function GO:0005515; protein binding; Molecular Function
G_lucidum_10002316	NA	K04460 PPP5C, PP5 protein phosphatase 5 3.1.3.16 Environmental Information Processing; Signal Transduction; MAPK signaling pathway [PATH:ko04010]	NA	RPAP3_CHICK RNA polymerase II-associated protein 3 OS=Gallus gallus GN=RPAP3 PE=2 SV=1	B8PEH8_POSPM Predicted protein (Fragment) OS=Postia placenta (strain ATCC 44394 / Madison 698-R) GN=POSPLDRAFT_27166 PE=4 SV=1	predicted protein [Postia placenta Mad-698-R]	IPR011990; Tetratricopeptide-like helical	GO:0005488; binding; Molecular Function
G_lucidum_10002317	NA	NA	NA	NA	D6RNE8_COPC7 Other/FunK1 protein kinase OS=Coprinopsis cinerea (strain Okayama-7 / 130 / FGSC 9003) GN=CC1G_15618 PE=4 SV=1	other/FunK1 protein kinase [Coprinopsis cinerea okayama7#130]	IPR011009; Protein kinase-like domain	NA
G_lucidum_10002318	NA	NA	NA	NA	D6RNE9_COPC7 Other/FunK1 protein kinase OS=Coprinopsis cinerea (strain Okayama-7 / 130 / FGSC 9003) GN=CC1G_15619 PE=4 SV=1	other/FunK1 protein kinase [Coprinopsis cinerea okayama7#130]	NA	NA
G_lucidum_10002319	NA	NA	NA	NA	NA	NA	NA	NA
G_lucidum_10002320	NA	NA	NA	NA	NA	NA	NA	NA
G_lucidum_10002321	PF02265.10;	K05986 E3.1.30.1 -- -- Unclassified; Metabolism; Others	NA	NUP3_PENSQ Nuclease PA3 OS=Penicillium sp. PE=1 SV=1	Q9P356_LENED Nuclease Le1 OS=Lentinula edodes GN=ncl-le1 PE=2 SV=1	nuclease Le1 [Lentinula edodes]	IPR003154; S1/P1 nuclease IPR008947; Phospholipase C/P1 nuclease, core	GO:0003676; nucleic acid binding; Molecular Function GO:0004519; endonuclease activity; Molecular Function GO:0006308; DNA catabolic process; Biological Process GO:0016788; hydrolase activity, acting on ester bonds; Molecular Function
G_lucidum_10002322	NA	NA	NA	NA	NA	NA	NA	NA
G_lucidum_10002323	PF03235.8;	NA	COG1479 Uncharacterized conserved protein S Function unknown ;	NA	B0E0M1_LACBS Predicted protein OS=Laccaria bicolor (strain S238N-H82) GN=LACBIDRAFT_295945 PE=4 SV=1	predicted protein [Laccaria bicolor S238N-H82]	IPR004919; Domain of unknown function DUF262	NA
G_lucidum_10002324	PF05557.7;	K06679 MAD1 mitotic spindle assembly checkpoint protein MAD1 -- Genetic Information Processing; Replication and Repair; Chromosome [BR:ko03036] Cellular Processes; Cell Growth and Death; Cell cycle - yeast [PATH:ko04111] Cellular Processes; Cell Growth and Death; Meiosis - yeast [PATH:ko04113] Cellular Processes; Cell Growth and Death; Oocyte meiosis [PATH:ko04114]	NA	MAD1_SCHPO Spindle assembly checkpoint component mad1 OS=Schizosaccharomyces pombe GN=mad1 PE=2 SV=1	A8PBC7_COPC7 Putative uncharacterized protein OS=Coprinopsis cinerea (strain Okayama-7 / 130 / FGSC 9003) GN=CC1G_02614 PE=4 SV=1	hypothetical protein CC1G_02614 [Coprinopsis cinerea okayama7#130]	IPR008672; Mitotic checkpoint	NA
G_lucidum_10002325	NA	NA	NA	NA	NA	NA	NA	NA
G_lucidum_10002326	NA	NA	NA	NA	C9NYY9_9VIBR Putative uncharacterized protein OS=Vibrio coralliilyticus ATCC BAA-450 GN=VIC_004665 PE=4 SV=1	hypothetical protein VIC_004665 [Vibrio coralliilyticus ATCC BAA-450]	IPR011008; Dimeric alpha-beta barrel	NA
G_lucidum_10002327	NA	NA	NA	NA	D6RNE9_COPC7 Other/FunK1 protein kinase OS=Coprinopsis cinerea (strain Okayama-7 / 130 / FGSC 9003) GN=CC1G_15619 PE=4 SV=1	other/FunK1 protein kinase [Coprinopsis cinerea okayama7#130]	IPR008266; Tyrosine-protein kinase, active site IPR011009; Protein kinase-like domain IPR017442; Serine/threonine-protein kinase-like domain	GO:0004672; protein kinase activity; Molecular Function GO:0004713; protein tyrosine kinase activity; Molecular Function GO:0005524; ATP binding; Molecular Function GO:0006468; protein phosphorylation; Biological Process
G_lucidum_10002328	NA	NA	NA	NA	D8PWR8_SCHCO Putative uncharacterized protein (Fragment) OS=Schizophyllum commune H4-8 GN=SCHCODRAFT_105639 PE=4 SV=1	hypothetical protein SCHCODRAFT_105639 [Schizophyllum commune H4-8]	NA	NA
G_lucidum_10002329	NA	NA	NA	NA	D6RNE9_COPC7 Other/FunK1 protein kinase OS=Coprinopsis cinerea (strain Okayama-7 / 130 / FGSC 9003) GN=CC1G_15619 PE=4 SV=1	other/FunK1 protein kinase [Coprinopsis cinerea okayama7#130]	IPR008266; Tyrosine-protein kinase, active site IPR011009; Protein kinase-like domain IPR017442; Serine/threonine-protein kinase-like domain	GO:0004672; protein kinase activity; Molecular Function GO:0004713; protein tyrosine kinase activity; Molecular Function GO:0005524; ATP binding; Molecular Function GO:0006468; protein phosphorylation; Biological Process
G_lucidum_10002330	NA	NA	NA	NA	D8PWR8_SCHCO Putative uncharacterized protein (Fragment) OS=Schizophyllum commune H4-8 GN=SCHCODRAFT_105639 PE=4 SV=1	hypothetical protein SCHCODRAFT_105639 [Schizophyllum commune H4-8]	NA	NA
G_lucidum_10002331	NA	NA	NA	NA	A8PDC0_COPC7 Other/FunK1 protein kinase OS=Coprinopsis cinerea (strain Okayama-7 / 130 / FGSC 9003) GN=CC1G_09455 PE=4 SV=2	other/FunK1 protein kinase [Coprinopsis cinerea okayama7#130]	NA	NA
G_lucidum_10002332	NA	NA	NA	NA	D6RNE9_COPC7 Other/FunK1 protein kinase OS=Coprinopsis cinerea (strain Okayama-7 / 130 / FGSC 9003) GN=CC1G_15619 PE=4 SV=1	other/FunK1 protein kinase [Coprinopsis cinerea okayama7#130]	IPR008266; Tyrosine-protein kinase, active site IPR011009; Protein kinase-like domain	GO:0004713; protein tyrosine kinase activity; Molecular Function GO:0005524; ATP binding; Molecular Function GO:0006468; protein phosphorylation; Biological Process
G_lucidum_10002333	NA	NA	NA	NA	A8PDD1_COPC7 Other/FunK1 protein kinase OS=Coprinopsis cinerea (strain Okayama-7 / 130 / FGSC 9003) GN=CC1G_09461 PE=4 SV=2	other/FunK1 protein kinase [Coprinopsis cinerea okayama7#130]	NA	NA
G_lucidum_10002334	NA	NA	NA	NA	D6RNE9_COPC7 Other/FunK1 protein kinase OS=Coprinopsis cinerea (strain Okayama-7 / 130 / FGSC 9003) GN=CC1G_15619 PE=4 SV=1	other/FunK1 protein kinase [Coprinopsis cinerea okayama7#130]	NA	NA
G_lucidum_10002335	NA	NA	NA	NA	D6RNE9_COPC7 Other/FunK1 protein kinase OS=Coprinopsis cinerea (strain Okayama-7 / 130 / FGSC 9003) GN=CC1G_15619 PE=4 SV=1	other/FunK1 protein kinase [Coprinopsis cinerea okayama7#130]	NA	NA
G_lucidum_10002336	NA	NA	NA	NA	D6RNE9_COPC7 Other/FunK1 protein kinase OS=Coprinopsis cinerea (strain Okayama-7 / 130 / FGSC 9003) GN=CC1G_15619 PE=4 SV=1	other/FunK1 protein kinase [Coprinopsis cinerea okayama7#130]	IPR008266; Tyrosine-protein kinase, active site	GO:0004713; protein tyrosine kinase activity; Molecular Function GO:0005524; ATP binding; Molecular Function GO:0006468; protein phosphorylation; Biological Process
G_lucidum_10002337	NA	NA	NA	NA	D8PWR8_SCHCO Putative uncharacterized protein (Fragment) OS=Schizophyllum commune H4-8 GN=SCHCODRAFT_105639 PE=4 SV=1	hypothetical protein SCHCODRAFT_105639 [Schizophyllum commune H4-8]	NA	NA
G_lucidum_10002338	PF00789.14;PF08059.7;	K14012 SHP1, UBX1, NSFL1C UBX domain-containing protein 1 -- Genetic Information Processing; Folding, Sorting and Degradation; Protein processing in endoplasmic reticulum [PATH:ko04141]	NA	UBX1_EMENI UBX domain-containing protein 1 OS=Emericella nidulans GN=ubx1 PE=3 SV=1	D8Q6Y8_SCHCO Putative uncharacterized protein (Fragment) OS=Schizophyllum commune H4-8 GN=SCHCODRAFT_56909 PE=4 SV=1	hypothetical protein SCHCODRAFT_56909 [Schizophyllum commune H4-8]	IPR001012; UBX IPR012989; SEP domain	GO:0005515; protein binding; Molecular Function
G_lucidum_10002339	PF02996.11;	K04797 pfdA, PFDN5 prefoldin alpha subunit -- Genetic Information Processing; Folding, Sorting and Degradation; Chaperones and folding catalysts [BR:ko03110]	COG1730 Predicted prefoldin, molecular chaperone implicated in de novo protein folding O Posttranslational modification, protein turnover, chaperones ;	PFD5_SCHPO Probable prefoldin subunit 5 OS=Schizosaccharomyces pombe GN=bob1 PE=1 SV=1	B0DTA5_LACBS Predicted protein OS=Laccaria bicolor (strain S238N-H82) GN=LACBIDRAFT_332595 PE=4 SV=1	predicted protein [Laccaria bicolor S238N-H82]	IPR004127; Prefoldin subunit IPR009053; Prefoldin IPR011599; Prefoldin alpha subunit	GO:0006457; protein folding; Biological Process GO:0016272; prefoldin complex; Cellular Component GO:0051082; unfolded protein binding; Molecular Function
G_lucidum_10002340	NA	NA	NA	NA	D8PKC8_SCHCO Putative uncharacterized protein (Fragment) OS=Schizophyllum commune H4-8 GN=SCHCODRAFT_103113 PE=4 SV=1	hypothetical protein SCHCODRAFT_103113 [Schizophyllum commune H4-8]	NA	NA
G_lucidum_10002341	NA	NA	NA	NA	A8PBC3_COPC7 Putative uncharacterized protein OS=Coprinopsis cinerea (strain Okayama-7 / 130 / FGSC 9003) GN=CC1G_02611 PE=4 SV=1	hypothetical protein CC1G_02611 [Coprinopsis cinerea okayama7#130]	NA	NA
G_lucidum_10002342	PF00083.18;PF01494.13;	K08139 HXT MFS transporter, SP family, sugar:H+ symporter -- Environmental Information Processing; Membrane Transport; Transporters [BR:ko02000] Cellular Processes; Cell Growth and Death; Meiosis - yeast [PATH:ko04113]	NA	GHT2_SCHPO High-affinity glucose transporter ght2 OS=Schizosaccharomyces pombe GN=ght2 PE=1 SV=1	D8Q6V6_SCHCO Putative uncharacterized protein OS=Schizophyllum commune H4-8 GN=SCHCODRAFT_68300 PE=3 SV=1	hypothetical protein SCHCODRAFT_68300 [Schizophyllum commune H4-8]	IPR002938; Monooxygenase, FAD-binding IPR003663; Sugar/inositol transporter IPR005828; General substrate transporter IPR005829; Sugar transporter, conserved site IPR016196; Major facilitator superfamily, general substrate transporter IPR020846; Major facilitator superfamily	GO:0004497; monooxygenase activity; Molecular Function GO:0005215; transporter activity; Molecular Function GO:0006810; transport; Biological Process GO:0016020; membrane; Cellular Component GO:0016021; integral to membrane; Cellular Component GO:0022891; substrate-specific transmembrane transporter activity; Molecular Function GO:0055085; transmembrane transport; Biological Process GO:0055114; o…
G_lucidum_10002343	NA	NA	NA	NA	B8PHI1_POSPM Predicted protein OS=Postia placenta (strain ATCC 44394 / Madison 698-R) GN=POSPLDRAFT_100617 PE=4 SV=1	predicted protein [Postia placenta Mad-698-R]	NA	NA
G_lucidum_10002344	PF00106.19;	K06123 E1.1.1.101, AYR1 1-acylglycerone phosphate reductase 1.1.1.101 Metabolism; Lipid Metabolism; Glycerophospholipid metabolism [PATH:ko00564] Metabolism; Lipid Metabolism; Ether lipid metabolism [PATH:ko00565]	COG1028 Dehydrogenases with different specificities (related to short-chain alcohol dehydrogenases) IQR Lipid transport and metabolism ; Secondary metabolites biosynthesis, transport and catabolism ; General function prediction only ;	YAEB_SCHPO Uncharacterized oxidoreductase C23D3.11 OS=Schizosaccharomyces pombe GN=SPAC23D3.11 PE=2 SV=2	B0CR92_LACBS Oxidoreductase OS=Laccaria bicolor (strain S238N-H82) GN=LACBIDRAFT_187296 PE=3 SV=1	oxidoreductase [Laccaria bicolor S238N-H82]	IPR002198; Short-chain dehydrogenase/reductase SDR IPR002347; Glucose/ribitol dehydrogenase IPR016040; NAD(P)-binding domain	GO:0003824; catalytic activity; Molecular Function GO:0005488; binding; Molecular Function GO:0008152; metabolic process; Biological Process GO:0016491; oxidoreductase activity; Molecular Function GO:0055114; oxidation-reduction process; Biological Process
G_lucidum_10002345	NA	NA	NA	NA	D6RNE3_COPC7 Other/FunK1 protein kinase OS=Coprinopsis cinerea (strain Okayama-7 / 130 / FGSC 9003) GN=CC1G_15613 PE=4 SV=1	other/FunK1 protein kinase [Coprinopsis cinerea okayama7#130]	IPR008266; Tyrosine-protein kinase, active site IPR011009; Protein kinase-like domain	GO:0004713; protein tyrosine kinase activity; Molecular Function GO:0005524; ATP binding; Molecular Function GO:0006468; protein phosphorylation; Biological Process
G_lucidum_10002346	NA	NA	NA	NA	D6RNE9_COPC7 Other/FunK1 protein kinase OS=Coprinopsis cinerea (strain Okayama-7 / 130 / FGSC 9003) GN=CC1G_15619 PE=4 SV=1	other/FunK1 protein kinase [Coprinopsis cinerea okayama7#130]	NA	NA
G_lucidum_10000409	NA	NA	NA	NA	NA	NA	NA	NA
G_lucidum_10000410	NA	NA	NA	NA	NA	NA	NA	NA
G_lucidum_10000024	NA	NA	NA	NA	NA	NA	NA	NA
G_lucidum_10000411	PF00743.13;	K00485 E1.14.13.8 dimethylaniline monooxygenase (N-oxide forming) 1.14.13.8 Metabolism; Xenobiotics Biodegradation and Metabolism; Drug metabolism - cytochrome P450 [PATH:ko00982]	COG2072 Predicted flavoprotein involved in K+ transport P Inorganic ion transport and metabolism ;	YUC11_ARATH Putative flavin-containing monooxygenase YUCCA11 OS=Arabidopsis thaliana GN=YUC11 PE=3 SV=1	B8PKT5_POSPM Predicted protein OS=Postia placenta (strain ATCC 44394 / Madison 698-R) GN=POSPLDRAFT_105236 PE=4 SV=1	predicted protein [Postia placenta Mad-698-R]	IPR020946; Flavin-containing monooxygenase-like	GO:0004499; flavin-containing monooxygenase activity; Molecular Function GO:0050660; FAD or FADH2 binding; Molecular Function GO:0050661; NADP or NADPH binding; Molecular Function GO:0055114; oxidation-reduction process; Biological Process
G_lucidum_10000646	NA	NA	NA	NA	NA	NA	NA	NA
G_lucidum_10000647	PF00075.18;	K03469 E3.1.26.4A, RNASEH1, rnhA ribonuclease HI 3.1.26.4 Genetic Information Processing; Replication and Repair; DNA replication [PATH:ko03030] Genetic Information Processing; Replication and Repair; DNA replication proteins [BR:ko03032]	COG0328 Ribonuclease HI L Replication, recombination and repair ;	RNH1_RAT Ribonuclease H1 OS=Rattus norvegicus GN=Rnaseh1 PE=2 SV=1	E2LRK4_CRIPE Putative uncharacterized protein (Fragment) OS=Moniliophthora perniciosa FA553 GN=MPER_09617 PE=4 SV=1	hypothetical protein MPER_09617 [Moniliophthora perniciosa FA553]	IPR002156; Ribonuclease H domain IPR012337; Ribonuclease H-like	GO:0003676; nucleic acid binding; Molecular Function GO:0004523; ribonuclease H activity; Molecular Function
G_lucidum_10000648	NA	NA	NA	NA	NA	NA	NA	NA
G_lucidum_10000649	NA	NA	NA	NA	NA	NA	NA	NA
G_lucidum_10000006	NA	NA	NA	NA	D8Q716_SCHCO Putative uncharacterized protein (Fragment) OS=Schizophyllum commune H4-8 GN=SCHCODRAFT_109595 PE=4 SV=1	hypothetical protein SCHCODRAFT_109595 [Schizophyllum commune H4-8]	NA	NA
G_lucidum_10004380	PF07249.6;	NA	NA	AL15_ASPFU Allergen Asp f 15 OS=Aspergillus fumigatus GN=AFUA_2G12630 PE=1 SV=1	C9SYD6_VERA1 SnodProt1 OS=Verticillium albo-atrum (strain VaMs.102) GN=VDBG_09911 PE=4 SV=1	SnodProt1 [Verticillium albo-atrum VaMs.102]	IPR010829; Cerato-platanin	NA
G_lucidum_10004381	PF06244.6;	NA	NA	CC124_SCHPO Coiled-coil domain-containing protein 124 homolog OS=Schizosaccharomyces pombe GN=SPBC29A10.12 PE=2 SV=1	A8P9V3_COPC7 Putative uncharacterized protein OS=Coprinopsis cinerea (strain Okayama-7 / 130 / FGSC 9003) GN=CC1G_09182 PE=4 SV=2	hypothetical protein CC1G_09182 [Coprinopsis cinerea okayama7#130]	IPR010422; Protein of unknown function DUF1014	NA
G_lucidum_10004382	PF04847.6;	NA	NA	RCAN2_BOVIN Calcipressin-2 OS=Bos taurus GN=RCAN2 PE=2 SV=1	A8P9V1_COPC7 Calcineurin-binding protein OS=Coprinopsis cinerea (strain Okayama-7 / 130 / FGSC 9003) GN=CC1G_09181 PE=4 SV=1	calcineurin-binding protein [Coprinopsis cinerea okayama7#130]	IPR006931; Calcipressin	GO:0019722; calcium-mediated signaling; Biological Process
G_lucidum_10004383	PF07249.6;	NA	NA	NA	NA	NA	IPR010829; Cerato-platanin	NA
G_lucidum_10004384	PF06985.5;	NA	NA	HETE1_PODAN Vegetative incompatibility protein HET-E-1 OS=Podospora anserina GN=HET-E1 PE=4 SV=1	C5FMV4_NANOT HET domain-containing protein OS=Nannizzia otae (strain CBS 113480) GN=MCYG_04009 PE=4 SV=1	hypothetical protein GLRG_11089 [Glomerella graminicola M1.001]	IPR010730; Heterokaryon incompatibility	NA
G_lucidum_10004385	NA	NA	NA	NA	B0D2Y5_LACBS Predicted protein OS=Laccaria bicolor (strain S238N-H82) GN=LACBIDRAFT_324760 PE=4 SV=1	predicted protein [Laccaria bicolor S238N-H82]	NA	NA
G_lucidum_10004386	PF03370.7;	K07189 PPP1R3 protein phosphatase 1, regulatory (inhibitor) subunit 3 -- Organismal Systems; Endocrine System; Insulin signaling pathway [PATH:ko04910]	NA	PPR3D_HUMAN Protein phosphatase 1 regulatory subunit 3D OS=Homo sapiens GN=PPP1R3D PE=1 SV=1	B8PDJ0_POSPM Putative uncharacterized protein OS=Postia placenta (strain ATCC 44394 / Madison 698-R) GN=POSPLDRAFT_92415 PE=4 SV=1	hypothetical protein POSPLDRAFT_92415 [Postia placenta Mad-698-R]	IPR005036; Putative phosphatase regulatory subunit	GO:0005515; protein binding; Molecular Function
G_lucidum_10004387	PF12937.1;	NA	NA	NA	NA	NA	IPR001810; F-box domain, cyclin-like	GO:0005515; protein binding; Molecular Function
G_lucidum_10004388	PF05051.7;	K02260 COX17 cytochrome c oxidase subunit XVII assembly protein -- Metabolism; Energy Metabolism; Oxidative phosphorylation [PATH:ko00190]	NA	COX17_PIG Cytochrome c oxidase copper chaperone OS=Sus scrofa GN=COX17 PE=1 SV=1	D6RKZ8_COPC7 Putative uncharacterized protein OS=Coprinopsis cinerea (strain Okayama-7 / 130 / FGSC 9003) GN=CC1G_13991 PE=4 SV=1	hypothetical protein CC1G_13991 [Coprinopsis cinerea okayama7#130]	IPR007745; Cytochrome c oxidase copper chaperone IPR009069; MTCP1	GO:0005507; copper ion binding; Molecular Function GO:0005758; mitochondrial intermembrane space; Cellular Component GO:0006825; copper ion transport; Biological Process GO:0016531; copper chaperone activity; Molecular Function
G_lucidum_10004389	PF01485.15;	K11968 ARIH1 ariadne-1 -- Genetic Information Processing; Folding, Sorting and Degradation; Ubiquitin system [BR:ko04121]	NA	YKX2_SCHPO Uncharacterized RING finger protein C328.02 OS=Schizosaccharomyces pombe GN=SPAC328.02 PE=2 SV=1	B0D1I9_LACBS Predicted protein OS=Laccaria bicolor (strain S238N-H82) GN=LACBIDRAFT_246915 PE=4 SV=1	predicted protein [Laccaria bicolor S238N-H82]	IPR002867; Zinc finger, C6HC-type	GO:0008270; zinc ion binding; Molecular Function
G_lucidum_10004390	PF00400.26;PF06985.5;	K00777 E2.4.2.- -- -- Unclassified; Metabolism; Others	COG2319 FOG: WD40 repeat R General function prediction only ;	PFS2_CRYNE Polyadenylation factor subunit 2 OS=Cryptococcus neoformans GN=PFS2 PE=3 SV=1	B0D356_LACBS Predicted protein OS=Laccaria bicolor (strain S238N-H82) GN=LACBIDRAFT_384388 PE=4 SV=1	predicted protein [Laccaria bicolor S238N-H82]	IPR001680; WD40 repeat IPR010730; Heterokaryon incompatibility IPR011046; WD40 repeat-like-containing domain IPR015943; WD40/YVTN repeat-like-containing domain IPR017986; WD40-repeat-containing domain IPR019781; WD40 repeat, subgroup IPR019782; WD40 repeat 2	GO:0005515; protein binding; Molecular Function
G_lucidum_10004391	PF07249.6;	NA	NA	SNP1_PHANO Protein SnodProt1 OS=Phaeosphaeria nodorum GN=SNOG_13722 PE=2 SV=1	A7EXN1_SCLS1 Putative uncharacterized protein OS=Sclerotinia sclerotiorum (strain ATCC 18683 / 1980 / Ss-1) GN=SS1G_10096 PE=4 SV=1	hypothetical protein SS1G_10096 [Sclerotinia sclerotiorum 1980]	IPR009009; Barwin-related endoglucanase IPR010829; Cerato-platanin	NA
G_lucidum_10004392	NA	NA	NA	NA	D6RNE9_COPC7 Other/FunK1 protein kinase OS=Coprinopsis cinerea (strain Okayama-7 / 130 / FGSC 9003) GN=CC1G_15619 PE=4 SV=1	other/FunK1 protein kinase [Coprinopsis cinerea okayama7#130]	IPR011009; Protein kinase-like domain	NA
G_lucidum_10004393	PF00534.14;	K03843 ALG2 alpha-1,3/alpha-1,6-mannosyltransferase 2.4.1.132 2.4.1.- Metabolism; Glycan Biosynthesis and Metabolism; Glycosyltransferases [BR:ko01003] Metabolism; Glycan Biosynthesis and Metabolism; N-Glycan biosynthesis [PATH:ko00510]	COG0438 Glycosyltransferase M Cell wall/membrane/envelope biogenesis ;	ALG2_RHIPU Alpha-1,3-mannosyltransferase ALG2 OS=Rhizomucor pusillus GN=ALG2 PE=1 SV=1	B0D2Y7_LACBS Mannosyltransferase OS=Laccaria bicolor (strain S238N-H82) GN=ALG2 PE=4 SV=1	mannosyltransferase [Laccaria bicolor S238N-H82]	IPR001296; Glycosyl transferase, group 1	GO:0009058; biosynthetic process; Biological Process
G_lucidum_10004394	NA	NA	NA	NA	NA	NA	NA	NA
G_lucidum_10004395	PF03169.9;	NA	NA	OPT6_ARATH Oligopeptide transporter 6 OS=Arabidopsis thaliana GN=OPT6 PE=2 SV=1	B0DAP1_LACBS Oligopeptide transporter OS=Laccaria bicolor (strain S238N-H82) GN=LACBIDRAFT_190652 PE=4 SV=1	oligopeptide transporter [Laccaria bicolor S238N-H82]	IPR004813; Oligopeptide transporter OPT superfamily	GO:0055085; transmembrane transport; Biological Process
G_lucidum_10004396	PF07249.6;	NA	NA	AL15_ASPFU Allergen Asp f 15 OS=Aspergillus fumigatus GN=AFUA_2G12630 PE=1 SV=1	B0D2X1_LACBS Cerato-platanin-related secreted protein OS=Laccaria bicolor (strain S238N-H82) GN=LACBIDRAFT_172945 PE=4 SV=1	cerato-platanin-related secreted protein [Laccaria bicolor S238N-H82]	IPR010829; Cerato-platanin	NA
G_lucidum_10004397	PF00067.16;	K00490 CYP4F cytochrome P450, family 4, subfamily F (leukotriene-B4 20-monooxygenase) 1.14.13.30 Metabolism; Lipid Metabolism; Arachidonic acid metabolism [PATH:ko00590] Metabolism; Enzyme Families; Cytochrome P450 [BR:ko00199]	NA	C13AA_CAEEL Putative cytochrome P450 CYP13A10 OS=Caenorhabditis elegans GN=cyp-13A10 PE=2 SV=3	B8PDY3_POSPM Predicted protein (Fragment) OS=Postia placenta (strain ATCC 44394 / Madison 698-R) GN=POSPLDRAFT_20385 PE=3 SV=1	predicted protein [Postia placenta Mad-698-R]	IPR001128; Cytochrome P450 IPR002401; Cytochrome P450, E-class, group I	GO:0004497; monooxygenase activity; Molecular Function GO:0005506; iron ion binding; Molecular Function GO:0009055; electron carrier activity; Molecular Function GO:0020037; heme binding; Molecular Function GO:0055114; oxidation-reduction process; Biological Process
G_lucidum_10004398	NA	NA	NA	NA	NA	NA	NA	NA
G_lucidum_10004399	PF00067.16;	K00490 CYP4F cytochrome P450, family 4, subfamily F (leukotriene-B4 20-monooxygenase) 1.14.13.30 Metabolism; Lipid Metabolism; Arachidonic acid metabolism [PATH:ko00590] Metabolism; Enzyme Families; Cytochrome P450 [BR:ko00199]	COG2124 Cytochrome P450 Q Secondary metabolites biosynthesis, transport and catabolism ;	CP3AS_BOVIN Cytochrome P450 3A28 OS=Bos taurus GN=CYP3A28 PE=2 SV=1	B8PDY3_POSPM Predicted protein (Fragment) OS=Postia placenta (strain ATCC 44394 / Madison 698-R) GN=POSPLDRAFT_20385 PE=3 SV=1	predicted protein [Postia placenta Mad-698-R]	IPR001128; Cytochrome P450	GO:0004497; monooxygenase activity; Molecular Function GO:0005506; iron ion binding; Molecular Function GO:0009055; electron carrier activity; Molecular Function GO:0020037; heme binding; Molecular Function
G_lucidum_10004400	PF00067.16;	K00490 CYP4F cytochrome P450, family 4, subfamily F (leukotriene-B4 20-monooxygenase) 1.14.13.30 Metabolism; Lipid Metabolism; Arachidonic acid metabolism [PATH:ko00590] Metabolism; Enzyme Families; Cytochrome P450 [BR:ko00199]	COG2124 Cytochrome P450 Q Secondary metabolites biosynthesis, transport and catabolism ;	C13A1_CAEEL Putative cytochrome P450 CYP13A1 OS=Caenorhabditis elegans GN=cyp-13A1 PE=2 SV=1	B8PJV2_POSPM Predicted protein OS=Postia placenta (strain ATCC 44394 / Madison 698-R) GN=POSPLDRAFT_92220 PE=3 SV=1	predicted protein [Postia placenta Mad-698-R]	IPR001128; Cytochrome P450 IPR002401; Cytochrome P450, E-class, group I	GO:0004497; monooxygenase activity; Molecular Function GO:0005506; iron ion binding; Molecular Function GO:0009055; electron carrier activity; Molecular Function GO:0020037; heme binding; Molecular Function GO:0055114; oxidation-reduction process; Biological Process
G_lucidum_10004401	NA	NA	NA	NA	D6RNE8_COPC7 Other/FunK1 protein kinase OS=Coprinopsis cinerea (strain Okayama-7 / 130 / FGSC 9003) GN=CC1G_15618 PE=4 SV=1	other/FunK1 protein kinase [Coprinopsis cinerea okayama7#130]	NA	NA
G_lucidum_10004402	NA	NA	NA	NA	A9RXW5_PHYPA Predicted protein OS=Physcomitrella patens subsp. patens GN=PHYPADRAFT_161667 PE=4 SV=1	predicted protein [Physcomitrella patens subsp. patens]	NA	NA
G_lucidum_10004403	PF00689.15;PF00702.1;PF01915.16;PF00690.20;PF00933.15;PF00122.14;	K01539 ATP1A sodium/potassium-transporting ATPase subunit alpha 3.6.3.9 Organismal Systems; Circulatory System; Cardiac muscle contraction [PATH:ko04260] Organismal Systems; Digestive System; Salivary secretion [PATH:ko04970] Organismal Systems; Digestive System; Gastric acid secretion [PATH:ko04971] Organismal Systems; Excretory System; Aldosterone-regulated sodium reabsorption [PATH:ko04960] Or…	COG0474 Cation transport ATPase P Inorganic ion transport and metabolism ;	BXLB_ASPTN Probable exo-1,4-beta-xylosidase bxlB OS=Aspergillus terreus (strain NIH 2624 / FGSC A1156) GN=bxlB PE=3 SV=1	B0D375_LACBS Aminophospholipid-transporting P-type ATPase OS=Laccaria bicolor (strain S238N-H82) GN=LACBIDRAFT_232929 PE=3 SV=1	aminophospholipid-transporting P-type ATPase [Laccaria bicolor S238N-H82]	IPR001757; ATPase, P-type, K/Mg/Cd/Cu/Zn/Na/Ca/Na/H-transporter IPR001764; Glycoside hydrolase, family 3, N-terminal IPR002772; Glycoside hydrolase, family 3, C-terminal IPR004014; ATPase, P-type cation-transporter, N-terminal IPR005834; Haloacid dehalogenase-like hydrolase IPR006068; ATPase, P-type cation-transporter, C-terminal IPR006069; ATPase, P-type cation exchange, alpha subunit IPR008250;…	GO:0003824; catalytic activity; Molecular Function GO:0004553; hydrolase activity, hydrolyzing O-glycosyl compounds; Molecular Function GO:0005524; ATP binding; Molecular Function GO:0005975; carbohydrate metabolic process; Biological Process GO:0006754; ATP biosynthetic process; Biological Process GO:0006812; cation transport; Biological Process GO:0008152; metabolic process; Biological Process …
G_lucidum_10004404	NA	NA	NA	NA	B8PNK2_POSPM Predicted protein OS=Postia placenta (strain ATCC 44394 / Madison 698-R) GN=POSPLDRAFT_99780 PE=4 SV=1	predicted protein [Postia placenta Mad-698-R]	NA	NA
G_lucidum_10004405	PF00505.13;	K09274 K09274 HMG box factor, other -- Genetic Information Processing; Transcription; Transcription factors [BR:ko03000]	NA	MAT2_COCHE Mating-type protein MAT-2 OS=Cochliobolus heterostrophus GN=MAT2 PE=4 SV=1	B8PDJ2_POSPM Predicted protein OS=Postia placenta (strain ATCC 44394 / Madison 698-R) GN=POSPLDRAFT_92418 PE=4 SV=1	predicted protein [Postia placenta Mad-698-R]	IPR000910; High mobility group, HMG1/HMG2 IPR009071; High mobility group, superfamily	GO:0003677; DNA binding; Molecular Function GO:0005515; protein binding; Molecular Function GO:0005634; nucleus; Cellular Component
G_lucidum_10004406	PF07950.5;	NA	NA	NA	B0D376_LACBS Predicted protein OS=Laccaria bicolor (strain S238N-H82) GN=LACBIDRAFT_315798 PE=4 SV=1	predicted protein [Laccaria bicolor S238N-H82]	IPR012472; Domain of unknown function DUF1691	NA
G_lucidum_10004407	PF08208.5;	NA	NA	NA	A8PA03_COPC7 Putative uncharacterized protein OS=Coprinopsis cinerea (strain Okayama-7 / 130 / FGSC 9003) GN=CC1G_06063 PE=4 SV=1	hypothetical protein CC1G_06063 [Coprinopsis cinerea okayama7#130]	IPR013240; RNA polymerase I, subunit RPA34.5	NA
G_lucidum_10004408	PF10198.3;	K11315 TADA3L, ADA3, NGG1 transcriptional adapter 3 -- Genetic Information Processing; Replication and Repair; Chromosome [BR:ko03036]	NA	NGG1_SCHPO Chromatin-remodeling complexes subunit ngg1 OS=Schizosaccharomyces pombe GN=ngg1 PE=1 SV=1	B8PDI9_POSPM Predicted protein OS=Postia placenta (strain ATCC 44394 / Madison 698-R) GN=POSPLDRAFT_92412 PE=4 SV=1	predicted protein [Postia placenta Mad-698-R]	IPR019340; Histone acetyltransferases subunit 3	NA
G_lucidum_10004409	PF01769.10;	K07244 K07244 mgtE-like transporter -- Unclassified; Cellular Processes and Signaling; Other transporters	COG1824 Permease, similar to cation transporters P Inorganic ion transport and metabolism ;	S41A2_MOUSE Solute carrier family 41 member 2 OS=Mus musculus GN=Slc41a2 PE=2 SV=1	B0D2T7_LACBS Mg transporter OS=Laccaria bicolor (strain S238N-H82) GN=LACBIDRAFT_315632 PE=4 SV=1	Mg transporter [Laccaria bicolor S238N-H82]	IPR006667; MgtE magnesium transporter, integral membrane	GO:0006812; cation transport; Biological Process GO:0008324; cation transmembrane transporter activity; Molecular Function
[truncated: 11,248 more rows]

## Sheet: S3
Table S3 Fungi used in the study and their download website
Fungi			Download website
Basidiomycota
	Agaricomycotina
		Ganoderma lucidum	Our sequenced genome data
		Schizophyllum commune	http://genome.jgi-psf.org/Schco1/
		Laccaria bicolor	http://www.broadinstitute.org/annotation/genome/coprinus_cinereus/MultiDownloads.html
[truncated: 22 more rows]

## Sheet: S4
Table S4 The gene distribution of each fungus in each pathway
[truncated: 40 more rows]

[truncated: 5 more sheets: S5, S6, S7, S8, S9]
